# Supplementary material for: Nickel/photoredox-catalyzed carbonylative transformations of α-phosphorus-, α-sulfur-, and α-boron-substituted alkyl halides
Source: Royal Society of Chemistry journal article supplement (doi:10.1039/d4qo00167b), 2024-01-01

# Supporting Information

## Nickel/Photoredox-Catalyzed Carbonylative Transformations of $\alpha$ -Phosphorus-, $\alpha$ -Sulfur-, $\alpha$ -Boron-Substituted Alkyl Halides

Le-Cheng Wang <sup>a,b</sup> and Xiao-Feng Wu <sup>\*a,b</sup>

- 
- <sup>a</sup> *Dalian National Laboratory for Clean Energy, Dalian Institute of Chemical Physics, Chinese Academy of Sciences, 116023 Dalian, Liaoning, China. E-mail: xwu2020@dicp.ac.cn*
- <sup>b</sup> *Leibniz-Institut für Katalyse e.V., 18059 Rostock, Germany. E-mail: Xiao-Feng.Wu@catalysis.de*

---

# Contents

|                                                                                                   |     |
|---------------------------------------------------------------------------------------------------|-----|
| <b>1. General Information</b> .....                                                               | S1  |
| <b>2. Synthesis of the Starting Materials</b> .....                                               | S2  |
| <b>3. Optimization of the Reaction Conditions</b> .....                                           | S3  |
| <i>Table S1.</i> Optimization of the Reaction Conditions .....                                    | S3  |
| <i>Table S2.</i> Control reactions .....                                                          | S4  |
| <i>Table S3.</i> Research on other methods and alkyl halides .....                                | S5  |
| <b>4. General Procedure</b> .....                                                                 | S5  |
| General procedure for carbonylation of $\alpha$ -bromo alkyl phosphates with nucleophiles .....   | S5  |
| General procedure for carbonylation of $\alpha$ -bromo alkyl phosphates with alkyl bromides ..... | S5  |
| General procedure for four-component carbonylation of vinyl phosphonate .....                     | S5  |
| General procedure for 1 mmol scale synthesis .....                                                | S6  |
| <b>5. Synthetic applications.</b> .....                                                           | S7  |
| Synthesis of Wittig-Horner reagent .....                                                          | S7  |
| Synthesis of P-ligand .....                                                                       | S8  |
| <b>6. Mechanism Studies</b> .....                                                                 | S8  |
| <b>7. Competition between primary and second <math>\alpha</math>-phosphate halides</b> .....      | S9  |
| <b>8. Testing the reactivity of 3-iodopropanol</b> .....                                          | S9  |
| <b>9. Spectroscopic Data of Products</b> .....                                                    | S11 |
| <b>10. References</b> .....                                                                       | S47 |
| <b>11. Spectra Data for the Compounds</b> .....                                                   | S48 |

## 1. General Information

### Reagents, solvents, and analytical methods:

Unless otherwise noted, all reactions were carried out under carbon monoxide or nitrogen atmosphere. The reagents were ordered from Adamas-beta®, Energy Chemical, Sigma-Aldrich, Bidepharm and used without purification. All solvents were dried by standard techniques and distilled prior to use. Column chromatography was performed on silica gel (200-300 meshes) using petroleum ether (bp. 60~90 °C), dichloromethane and ethyl acetate as eluent. All NMR spectra were recorded at ambient temperature using Bruker Avance III 400 MHz NMR ( $^1\text{H}$ , 400 MHz;  $^{13}\text{C}$  {1H}, 101 MHz,  $^{19}\text{F}$  376 MHz), Bruker AVANCE III HD 700 MHz NMR spectrometers ( $^1\text{H}$ , 700 MHz;  $^{13}\text{C}$ {1H}, 176 MHz).  $^1\text{H}$  NMR chemical shifts are reported relative to TMS and were referenced via residual proton resonances of the corresponding deuterated solvent ( $\text{CDCl}_3$ : 7.26 ppm;  $\text{d}_6$ -DMSO: 2.50 ppm) whereas  $^{13}\text{C}$ {1H} NMR spectra are reported relative to TMS via the carbon signals of the deuterated solvent ( $\text{CDCl}_3$ : 77.0 ppm;  $\text{d}_6$ -DMSO: 39.5 ppm. Data for  $^1\text{H}$  are reported as follows: chemical shift ( $\delta$  ppm), multiplicity (s = singlet, d = doublet, t = triplet, q = quartet, quint = quintet, m = multiplet, br = broad), coupling constant (Hz), and integration. All  $^{13}\text{C}$  NMR spectra were broad-band  $^1\text{H}$  decoupled. All reactions were monitored by GC-FID or NMR analysis. HRMS data was obtained with Micromass HPLC-Q-TOF mass spectrometer (ESI-TOF) or Agilent 6540 Accurate-MS spectrometer (Q-TOF).

**NOTE:** Carbon monoxide should only be handled in a well-ventilated fume hood. The laboratory should be well-equipped with a CO detector and alarm system.

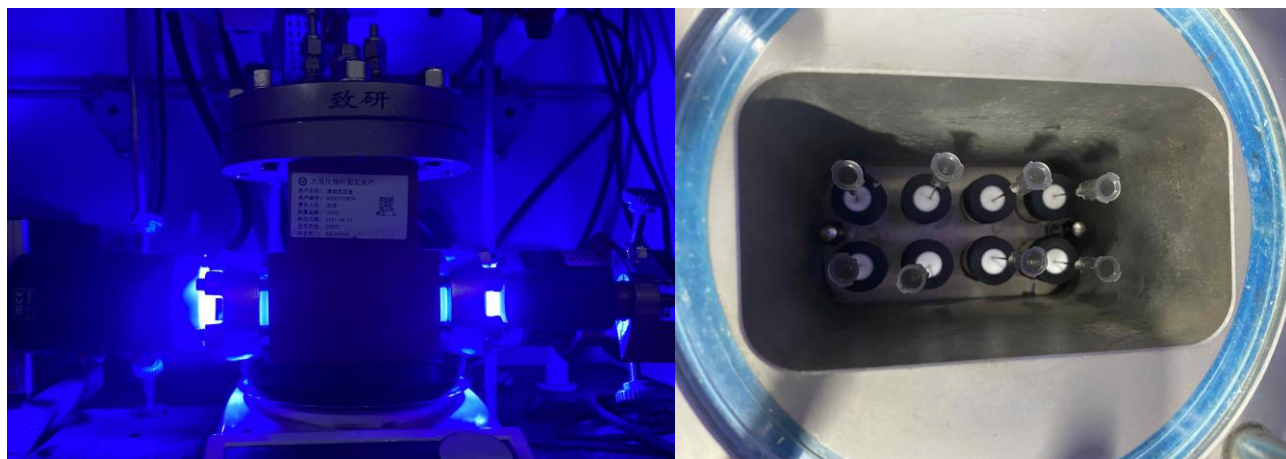

**Figure S1. Photochemical Setup**

## 2. Synthesis of the Starting Materials

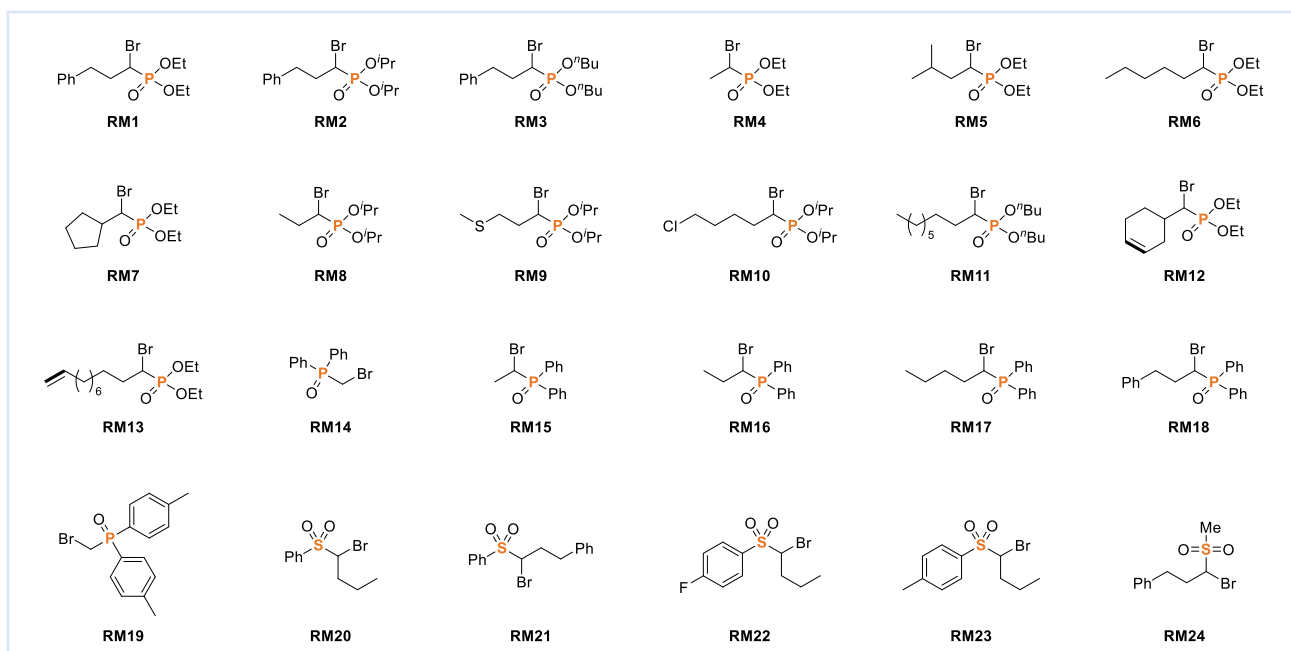

List of  $\alpha$ -Heteroatom Phosphorus and Sulfur Alkyl Halides

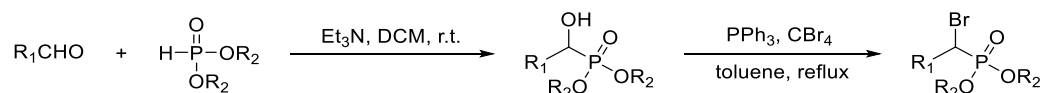

### Preparation of $\alpha$ -Bromophosphonates

According to the reported literature,  $\alpha$ -bromophosphonates (**RM1-RM13**) were conveniently synthesized in gram scale.<sup>[1-3]</sup>

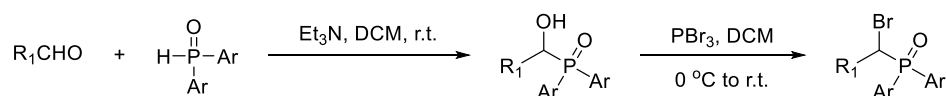

### Preparation of $\alpha$ -Bromoalkyl diarylphosphine Oxides

According to the reported literature,  $\alpha$ -bromoalkyl diarylphosphine oxides (**RM14-RM19**) were conveniently synthesized in gram scale.<sup>[2-3]</sup>



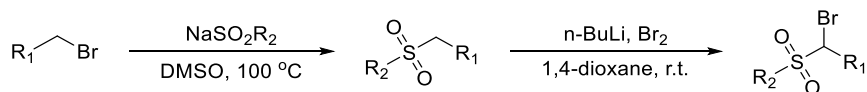

### Preparation of $\alpha$ -Bromosulfones

According to the reported literature,  $\alpha$ -bromosulfones (**RM20-RM24**) were conveniently synthesized in gram scale.<sup>[4]</sup>

## 3. Optimization of the Reaction Conditions

*Table S1. Optimization of the Reaction Conditions*

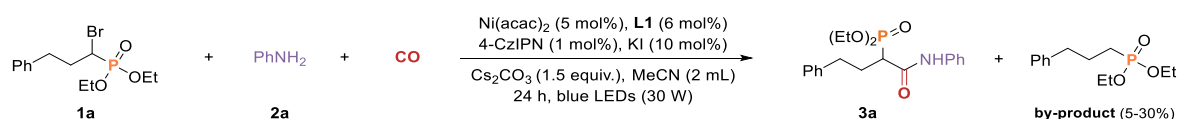

| Entry | <b>1a</b> eq. | <b>2a</b> eq. | Catlyst                | Ligand        | PC                                                      | Base                            | Solcent | Yield % |
|-------|---------------|---------------|------------------------|---------------|---------------------------------------------------------|---------------------------------|---------|---------|
| 1     | 1.2           | 1             | Ni(acac) <sub>2</sub>  | <b>L1</b>     | 4-CzIPN                                                 | Cs <sub>2</sub> CO <sub>3</sub> | MeCN    | 68      |
| 2     | 1.2           | 1             | NiBr <sub>2</sub> ·DME | <b>L1</b>     | 4-CzIPN                                                 | Cs <sub>2</sub> CO <sub>3</sub> | MeCN    | 17      |
| 3     | 1.2           | 1             | Ni(TMHD) <sub>2</sub>  | <b>L1</b>     | 4-CzIPN                                                 | Cs <sub>2</sub> CO <sub>3</sub> | MeCN    | 36      |
| 4     | 1.2           | 1             | Ni(OTf) <sub>2</sub>   | <b>L1</b>     | 4-CzIPN                                                 | Cs <sub>2</sub> CO <sub>3</sub> | MeCN    | 10      |
| 5     | 1.2           | 1             | NiI <sub>2</sub>       | <b>L1</b>     | 4-CzIPN                                                 | Cs <sub>2</sub> CO <sub>3</sub> | MeCN    | 8       |
| 6     | 1.2           | 1             | Ni(hfac) <sub>2</sub>  | <b>L1</b>     | 4-CzIPN                                                 | Cs <sub>2</sub> CO <sub>3</sub> | MeCN    | 13      |
| 7     | 1.2           | 1             | CuBr·DME               | <b>L1</b>     | 4-CzIPN                                                 | Cs <sub>2</sub> CO <sub>3</sub> | MeCN    | 0       |
| 8     | 1.2           | 1             | Co(acac) <sub>2</sub>  | <b>L1</b>     | 4-CzIPN                                                 | Cs <sub>2</sub> CO <sub>3</sub> | MeCN    | 0       |
| 9     | 1.2           | 1             | Ni(acac) <sub>2</sub>  | <b>L2-L18</b> | 4-CzIPN                                                 | Cs <sub>2</sub> CO <sub>3</sub> | MeCN    | 0-20    |
| 10    | 1.2           | 1             | Ni(acac) <sub>2</sub>  | <b>L1</b>     | Acr-Mes <sup>+</sup> ClO <sub>4</sub> <sup>-</sup>      | Cs <sub>2</sub> CO <sub>3</sub> | MeCN    | 2       |
| 11    | 1.2           | 1             | Ni(acac) <sub>2</sub>  | <b>L1</b>     | fac-Ir(ppy) <sub>3</sub>                                | Cs <sub>2</sub> CO <sub>3</sub> | MeCN    | 59      |
| 12    | 1.2           | 1             | Ni(acac) <sub>2</sub>  | <b>L1</b>     | Ru(bpy) <sub>3</sub> Cl <sub>2</sub> ·6H <sub>2</sub> O | Cs <sub>2</sub> CO <sub>3</sub> | MeCN    | 17      |
| 13    | 1.2           | 1             | Ni(acac) <sub>2</sub>  | <b>L1</b>     | 4-CzIPN                                                 | Na <sub>2</sub> CO <sub>3</sub> | MeCN    | 53      |
| 14    | 1.2           | 1             | Ni(acac) <sub>2</sub>  | <b>L1</b>     | 4-CzIPN                                                 | K <sub>3</sub> PO <sub>4</sub>  | MeCN    | 62      |
| 15    | 1.2           | 1             | Ni(acac) <sub>2</sub>  | <b>L1</b>     | 4-CzIPN                                                 | K <sub>2</sub> HPO <sub>4</sub> | MeCN    | 24      |
| 16    | 1.2           | 1             | Ni(acac) <sub>2</sub>  | <b>L1</b>     | 4-CzIPN                                                 | KOMe                            | MeCN    | 4       |

|                 |     |     |                       |           |         |                                 |                   |    |
|-----------------|-----|-----|-----------------------|-----------|---------|---------------------------------|-------------------|----|
| 17              | 1.2 | 1   | Ni(acac) <sub>2</sub> | <b>L1</b> | 4-CzIPN | DiPEA                           | MeCN              | 0  |
| 18              | 1.2 | 1   | Ni(acac) <sub>2</sub> | <b>L1</b> | 4-CzIPN | NEt <sub>3</sub>                | MeCN              | 0  |
| 19              | 1.2 | 1   | Ni(acac) <sub>2</sub> | <b>L1</b> | 4-CzIPN | Cs <sub>2</sub> CO <sub>3</sub> | PhCF <sub>3</sub> | 62 |
| 20              | 1.2 | 1   | Ni(acac) <sub>2</sub> | <b>L1</b> | 4-CzIPN | Cs <sub>2</sub> CO <sub>3</sub> | THF               | 10 |
| 21              | 1.2 | 1   | Ni(acac) <sub>2</sub> | <b>L1</b> | 4-CzIPN | Cs <sub>2</sub> CO <sub>3</sub> | DMAc              | 0  |
| 22              | 1.2 | 1   | Ni(acac) <sub>2</sub> | <b>L1</b> | 4-CzIPN | Cs <sub>2</sub> CO <sub>3</sub> | DCE               | 0  |
| 23              | 1.2 | 1   | Ni(acac) <sub>2</sub> | <b>L1</b> | 4-CzIPN | Cs <sub>2</sub> CO <sub>3</sub> | Toluene           | 5  |
| 23              | 1.2 | 1   | Ni(acac) <sub>2</sub> | <b>L1</b> | 4-CzIPN | Cs <sub>2</sub> CO <sub>3</sub> | Dioxane           | 8  |
| 23              | 1.5 | 1   | Ni(acac) <sub>2</sub> | <b>L1</b> | 4-CzIPN | Cs <sub>2</sub> CO <sub>3</sub> | MeCN              | 75 |
| 23              | 1   | 1.2 | Ni(acac) <sub>2</sub> | <b>L1</b> | 4-CzIPN | Cs <sub>2</sub> CO <sub>3</sub> | MeCN              | 54 |
| 23              | 1   | 1.5 | Ni(acac) <sub>2</sub> | <b>L1</b> | 4-CzIPN | Cs <sub>2</sub> CO <sub>3</sub> | MeCN              | 60 |
| 24 <sup>b</sup> | 1.2 | 1   | Ni(acac) <sub>2</sub> | <b>L1</b> | 4-CzIPN | Cs <sub>2</sub> CO <sub>3</sub> | MeCN              | 60 |
| 25 <sup>c</sup> | 1.2 | 1   | Ni(acac) <sub>2</sub> | <b>L1</b> | 4-CzIPN | Cs <sub>2</sub> CO <sub>3</sub> | MeCN              | 87 |
| 26 <sup>d</sup> | 1.2 | 1   | Ni(acac) <sub>2</sub> | <b>L1</b> | 4-CzIPN | Cs <sub>2</sub> CO <sub>3</sub> | MeCN              | 93 |

Reaction conditions: **1a** (1.2 mL), **2a** (0.2 mmol), Ni(acac)<sub>2</sub> (5 mol%), **L1** (6 mol%), 4-CzIPN (1 mol%), Cs<sub>2</sub>CO<sub>3</sub> (1.5 equiv.), CO (10 bar), 30W blue LEDs, 18-25 °C, 24 h. isolated yields. <sup>b</sup>1 bar CO. <sup>c</sup>KI (1 equiv.). <sup>d</sup>KI (10 mol%).

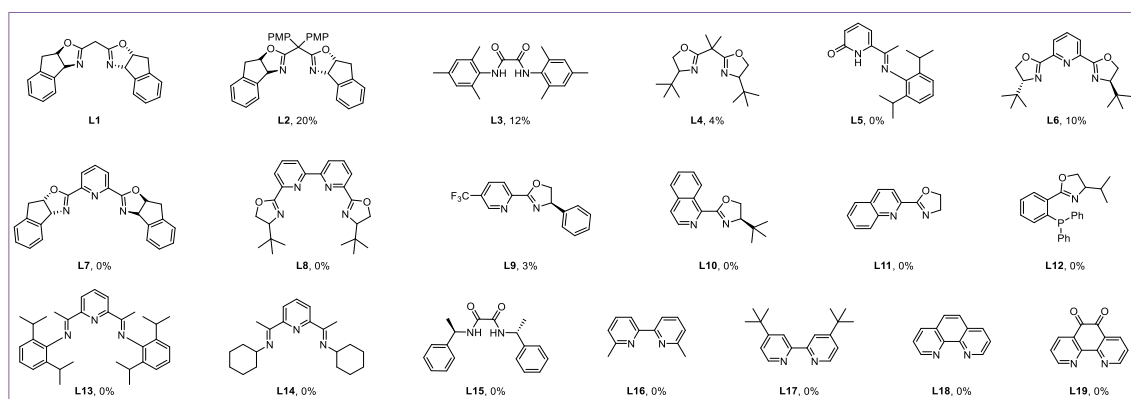

**Table S2. Control reactions**

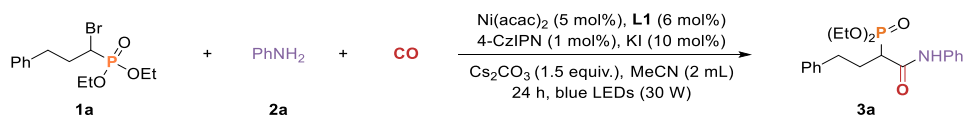

| Entry | Variation from standard conditions      | Yield % |
|-------|-----------------------------------------|---------|
| 1     | none                                    | 93      |
| 2     | Without Ni(acac) <sub>2</sub>           | 0       |
| 3     | Without <b>L1</b>                       | 0       |
| 4     | Without 4-CzIPN                         | 0       |
| 5     | Without Cs <sub>2</sub> CO <sub>3</sub> | 0       |
| 6     | Without light                           | 0       |

Reaction conditions: **1a** (1.2 mL), **2a** (0.2 mmol), Ni(acac)<sub>2</sub> (5 mol%), **L1** (6 mol%), 4-CzIPN (1 mol%), Cs<sub>2</sub>CO<sub>3</sub> (1.5 equiv.), CO (10 bar), 30W blue LEDs, 18-25 °C, 24 h. isolated yields.

**Table S3. Research on other methods and alkyl halides**

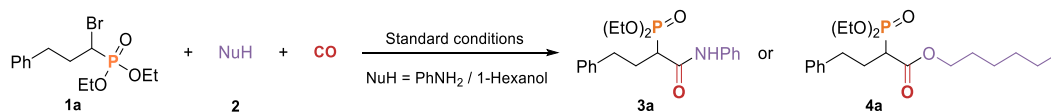

| Entry | standard conditions                                                                                                                                                                                                                             | Yield %          |
|-------|-------------------------------------------------------------------------------------------------------------------------------------------------------------------------------------------------------------------------------------------------|------------------|
| 1     | none                                                                                                                                                                                                                                            | 93 ( <b>3a</b> ) |
| 2     | <b>1a</b> (2.5 equiv), NuH = PhNH <sub>2</sub> (0.3 mmol), Pd(OAc) <sub>2</sub> (5 mol%), Xantphos (5 mol%), Na <sub>2</sub> CO <sub>3</sub> (1.5 equiv.), MeCN (1.5 mL), CO (6 bar), 50 °C, 18 h. <sup>[5]</sup>                               | 0                |
| 3     | <b>1a</b> (3 equiv), NuH = 1-hexanol (0.2 mmol), Fe <sub>3</sub> (CO) <sub>12</sub> (7.5 mol%), 1,10-Phen (9 mol%), Cs <sub>2</sub> CO <sub>3</sub> (3 equiv.), toliene (0.3 mL), CO (6 bar), 90 °C, 12 h. <sup>[6]</sup>                       | 0                |
| 4     | <b>1a</b> (0.25 mmol), NuH = 1-hexanol (0.25 mL), Pd(PPh <sub>3</sub> ) <sub>2</sub> Cl <sub>2</sub> (5 mol%), IMes (10 mol%), Cs <sub>2</sub> CO <sub>3</sub> (2 equiv.), <i>n</i> -heptane (0.25 mL), CO (2 bar), 50 °C, 24 h. <sup>[7]</sup> | 0                |
| 5     | <b>1a</b> (1.5 equiv), NuH = PhNH <sub>2</sub> (0.2 mmol), CuBr(Me <sub>2</sub> S) (10 mol%), bpy (10 mol%), Cs <sub>2</sub> CO <sub>3</sub> (2 equiv.), 1,4-dioxane (2 mL), CO (40 bar), 110 °C, 15 h, w or w/o KI (1 equiv.). <sup>[8]</sup>  | 0                |

Reaction conditions: **1a** (1.2 mL), **2a** (0.2 mmol), Ni(acac)<sub>2</sub> (5 mol%), **L1** (6 mol%), 4-CzIPN (1 mol%), Cs<sub>2</sub>CO<sub>3</sub> (1.5 equiv.), CO (10 bar), 30W blue LEDs, 18-25 °C, 24 h. isolated yields.

## 4. General Procedure

### General procedure for carbonylation of $\alpha$ -bromo alkyl phosphates with nucleophiles

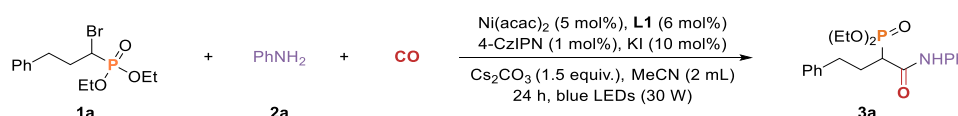

A 4 mL screw-cap vial was charged with Ni(acac)<sub>2</sub> (2.6 mg, 5 mol%), **L1** (4.0 mg, 6 mol%), 4-CzIPN (1.6 mg, 1 mol%), KI (3.3 mg, 10 mol%), Cs<sub>2</sub>CO<sub>3</sub> (97.7 mg, 1.5 equiv.), and a stirring bar. The vial was closed by PTFE/white rubber septum (Wheaton 13 mm Septa) and phenolic cap and connected with atmosphere with a needle. The vial was evacuated under vacuum and recharged with nitrogen for three times. After MeCN (2 mL),  $\alpha$ -bromo alkyl phosphate (1.2 equiv.), and nucleophiles (0.2 mmol) were added with a syringe under nitrogen atmosphere. The vials (usually 8) were placed on an alloy plate, which was transferred into an autoclave with two inserted quartz-glass windows. After the autoclave was flushed three times, it was pressurised with 10 bar of CO and then irradiated with 30 W blue LEDs at 18-25 °C for 24 h. After completed, the reaction mixture was directly purified by column chromatography on silica gel using petroleum ether and ethyl acetate to afford the corresponding product.

### General procedure for carbonylation of $\alpha$ -bromo alkyl phosphates with alkyl bromides

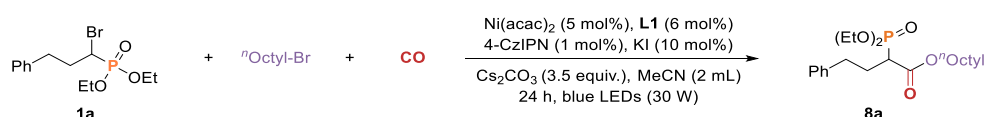

A 4 mL screw-cap vial was charged with Ni(acac)<sub>2</sub> (2.6 mg, 5 mol%), **L1** (4.0 mg, 6 mol%), 4-CzIPN (1.6 mg, 1 mol%), KI (3.3 mg, 10 mol%), Cs<sub>2</sub>CO<sub>3</sub> (228.0 mg, 1.5 equiv.), and a stirring bar. The vial was closed by PTFE/white rubber septum (Wheaton 13 mm Septa) and phenolic cap and connected with atmosphere with a needle. The vial was evacuated under vacuum and recharged with nitrogen for three times. After MeCN (2 mL),  $\alpha$ -bromo alkyl phosphate (1.2 equiv.), and alkyl bromides (0.2 mmol) were added with a syringe under nitrogen atmosphere. The vials (usually 8) were placed on an alloy plate, which was transferred into an autoclave with two inserted quartz-glass windows. After the autoclave was flushed three times, it was pressurised with 10 bar of CO and then irradiated with 30 W blue LEDs at 18-25 °C for 24 h. After completed, the reaction mixture was directly purified by column chromatography on silica gel using petroleum ether and ethyl acetate to afford the corresponding product.

## General procedure for four-component carbonylation of vinyl phosphonate

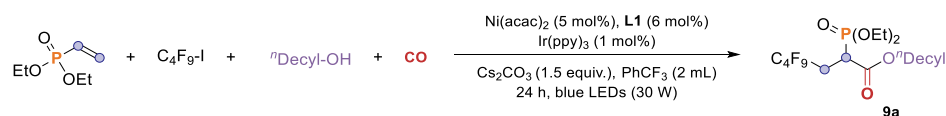

A 4 mL screw-cap vial was charged with Ni(acac)<sub>2</sub> (2.6 mg, 5 mol%), **L1** (4.0 mg, 6 mol%), 4-Ir(ppy)<sub>3</sub> (1.3 mg, 1 mol%), Cs<sub>2</sub>CO<sub>3</sub> (97.7 mg, 1.5 equiv.), and a stirring bar. The vial was closed by PTFE/white rubber septum (Wheaton 13 mm Septa) and phenolic cap and connected with atmosphere with a needle. The vial was evacuated under vacuum and recharged with nitrogen for three times. After MeCN (2 mL), vinyl phosphonate (1.5 equiv.), alcohols (0.2 mmol) and alkyl iodides (2.5 equiv.) were added with a syringe under nitrogen atmosphere. The vials (usually 8) were placed on an alloy plate, which was transferred into an autoclave with two inserted quartz-glass windows. After the autoclave was flushed three times, it was pressurised with 10 bar of CO and then irradiated with 30 W blue LEDs at 18-25 °C for 24 h. After completed, the reaction mixture was directly purified by column chromatography on silica gel using petroleum ether and ethyl acetate to afford the corresponding product.

## General procedure for 1 mmol scale synthesis

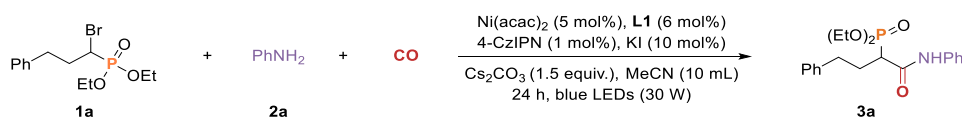

A 20 mL screw-cap vial was charged with Ni(acac)<sub>2</sub> (13 mg, 5 mol%), **L1** (20 mg, 6 mol%), 4-CzIPN (8 mg, 1 mol%), KI (16.5 mg, 10 mol%), Cs<sub>2</sub>CO<sub>3</sub> (488.5 mg, 1.5 equiv.), and a stirring bar. The vial was closed by PTFE/white rubber septum and phenolic cap and connected with atmosphere with a needle. The vial was evacuated under vacuum and recharged with nitrogen for three times. After MeCN (10 mL),  $\alpha$ -bromo alkyl phosphate (400.8 mg, 1.2 equiv.), and aniline (93.1 mg, 1 mmol) were added with a syringe under nitrogen atmosphere. The vial was placed on an alloy plate, which was transferred into an autoclave with two inserted quartz-glass windows. After the autoclave was flushed three times, it was pressurised with 10 bar of CO and then irradiated with 30 W blue LEDs at 18-25 °C for 24 h. After completed, the reaction mixture was directly purified by column chromatography on silica gel using petroleum ether and ethyl acetate to afford the corresponding product (0.27 g).

## 5. Synthetic applications.

### Synthesis of Wittig-Horner reagent

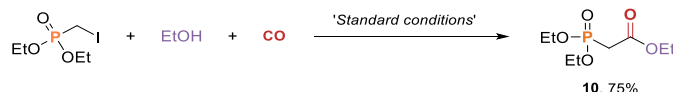

A 4 mL screw-cap vial was charged with Ni(acac)<sub>2</sub> (2.6 mg, 5 mol%), **L1** (4.0 mg, 6 mol%), 4-CzIPN (1.6 mg, 1 mol%), Cs<sub>2</sub>CO<sub>3</sub> (97.7 mg, 1.5 equiv.), and a stirring bar. The vial was closed by PTFE/white rubber septum (Wheaton 13 mm Septa) and phenolic cap and connected with atmosphere with a needle. The vial was evacuated under vacuum and recharged with nitrogen for three times. After PhCF<sub>3</sub> (2 mL),  $\alpha$ -iodide alkyl phosphate (1.2 equiv.) and ethanol (0.2 mmol) were added with a syringe under nitrogen atmosphere. The vial was placed on an alloy plate, which was transferred into an autoclave with two inserted quartz-glass windows. After the autoclave was flushed three times, it was pressurised with 10 bar of CO and then irradiated with 30 W blue LEDs at 18-25 °C for 24 h. After completed, the reaction mixture was directly purified by column chromatography on silica gel using petroleum ether and ethyl acetate to afford the corresponding Wittig-Horner reagent **10**.

### Synthesis of P-ligand

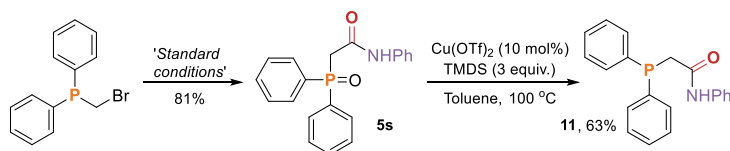

A 4 mL screw-cap vial was charged with Ni(acac)<sub>2</sub> (2.6 mg, 5 mol%), **L1** (4.0 mg, 6 mol%), 4-CzIPN (1.6 mg, 1 mol%), KI (3.3 mg, 10 mol%), Cs<sub>2</sub>CO<sub>3</sub> (97.7 mg, 1.5 equiv.), and a stirring bar. The vial was closed by PTFE/white rubber septum (Wheaton 13 mm Septa) and phenolic cap and connected with atmosphere with a needle. The vial was evacuated under vacuum and recharged with nitrogen for three times. After MeCN (2 mL),  $\alpha$ -bromo alkyl phosphine oxide (1.2 equiv.) and aniline (0.2 mmol) were added with a syringe under nitrogen atmosphere. The vials were placed on an alloy plate, which was transferred into an autoclave with two inserted quartz-glass windows. After the autoclave was flushed three times, it was pressurised with 10 bar of CO and then irradiated with 30 W blue LEDs at 18-25 °C for 24 h. After completed, the reaction mixture was directly purified by column chromatography on silica gel using petroleum ether and ethyl acetate to afford the corresponding product **5s**.

According to the reported literature,<sup>[9]</sup> the diphenylphosphine oxide (83.8 mg, 0.25 mmol) and Cu(OTf)<sub>2</sub> (9 mg, 10 mol%) were added in a 10 mL schlenk tube at room temperature. TMDS (66.7 mg, 0.5 mmol) and toluene (2 mL) were added under argon flow. The reaction mixture was stirred for 2 h at 100 °C. After completed, the reaction mixture was directly purified by column chromatography on silica gel using petroleum ether and ethyl acetate to afford the corresponding ligand **11**.

## 6. Mechanism Studies

### Radical chain mechanism studies

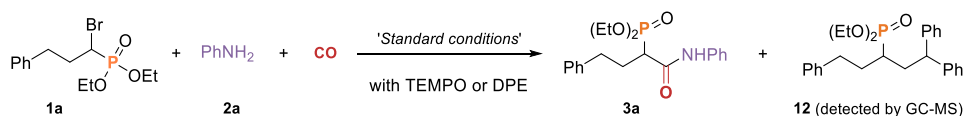

A 4 mL screw-cap vial was charged with  $\text{Ni}(\text{acac})_2$  (2.6 mg, 5 mol%), **L1** (4.0 mg, 6 mol%), 4-CzIPN (1.6 mg, 1 mol%), KI (3.3 mg, 10 mol%),  $\text{Cs}_2\text{CO}_3$  (97.7 mg, 1.5 equiv.), TEMPO (2 equiv.) / DPE (2 equiv.), and a stirring bar. The vial was closed by PTFE/white rubber septum (Wheaton 13 mm Septa) and phenolic cap and connected with atmosphere with a needle. The vial was evacuated under vacuum and recharged with nitrogen for three times. After MeCN (2 mL),  $\alpha$ -bromo alkyl phosphate (1.2 equiv.), and aniline (0.2 mmol) were added with a syringe under nitrogen atmosphere. The vials were placed on an alloy plate, which was transferred into an autoclave with two inserted quartz-glass windows. After the autoclave was flushed three times, it was pressurised with 10 bar of CO and then irradiated with 30 W blue LEDs at 18-25 °C for 24 h. After completed, the reaction results were detected by GC and GC-MS analysis.

## 7. Competition between primary and second $\alpha$ -phosphate halides

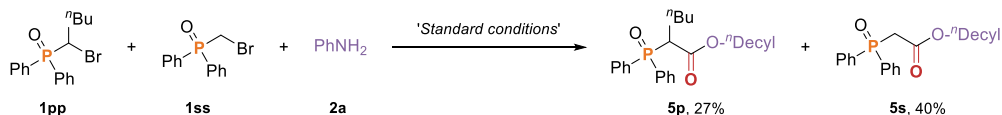

A 4 mL screw-cap vial was charged with  $\text{Ni}(\text{acac})_2$  (2.6 mg, 5 mol%), **L1** (4.0 mg, 6 mol%), 4-CzIPN (1.6 mg, 1 mol%), KI (3.3 mg, 10 mol%),  $\text{Cs}_2\text{CO}_3$  (97.7 mg, 1.5 equiv.), and a stirring bar. The vial was closed by PTFE/white rubber septum (Wheaton 13 mm Septa) and phenolic cap and connected with atmosphere with a needle. The vial was evacuated under vacuum and recharged with nitrogen for three times. After MeCN (2 mL),  $\alpha$ -bromo alkyl phosphate **1pp** (1.2 equiv.) and **1ss** (1.2 equiv.), and aniline (0.2 mmol) were added with a syringe under nitrogen atmosphere. The vials were placed on an alloy plate, which was transferred into an autoclave with two inserted quartz-glass windows. After the autoclave was flushed three times, it was pressurised with 10 bar of CO and then irradiated with 30 W blue LEDs at 18-25 °C for 24 h. After completed, the reaction mixture was directly purified by column chromatography on silica gel using petroleum ether and ethyl acetate to afford the corresponding products.

## 8. Testing the reactivity of 3-iodopropanol

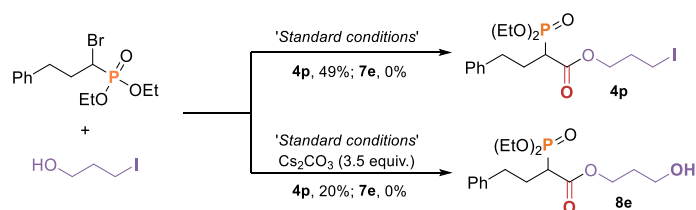

A 4 mL screw-cap vial was charged with  $\text{Ni}(\text{acac})_2$  (2.6 mg, 5 mol%), **L1** (4.0 mg, 6 mol%), 4-CzIPN (1.6 mg, 1 mol%), KI (3.3 mg, 10 mol%),  $\text{Cs}_2\text{CO}_3$  (condition a: 97.7 mg, 1.5 equiv. condition b: 228.0 mg, 3.5 equiv.), and a stirring bar. The vial was closed by PTFE/white rubber septum (Wheaton 13 mm Septa) and phenolic cap and connected with atmosphere with a needle. The vial was evacuated under vacuum and recharged with nitrogen for three times. After MeCN (2 mL),  $\alpha$ -bromo alkyl phosphate (1.2 equiv.), and 3-iodopropanol (0.2 mmol) were added with a syringe under nitrogen atmosphere. The vials were placed on an alloy plate, which was transferred into an autoclave with two inserted quartz-glass windows. After the autoclave was flushed three times, it was pressurised with 10 bar of CO and then irradiated with 30 W blue LEDs at 18–25 °C for 24 h. After completed, the reaction mixture was directly purified by column chromatography on silica gel using petroleum ether and ethyl acetate to afford the corresponding product.

## 9. Spectroscopic Data of Products

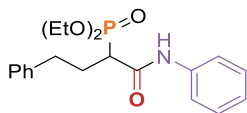

### Diethyl (1-oxo-4-phenyl-1-(phenylamino)butan-2-yl)phosphonate (**3a**)

This reaction was conducted on a 0.2 mmol scale with the general procedure. The crude product was purified by silica gel chromatography (PE/EA = 2:3) to afford the title compound as a brown liquid (64.5 mg, 86% yield). The identity of the product was confirmed by  $^1\text{H}$  NMR,  $^{13}\text{C}$  NMR,  $^{31}\text{P}$  NMR, and HRMS.

$^1\text{H}$  NMR (400 MHz,  $\text{CDCl}_3$ )  $\delta$  8.81 (s, 1H), 7.53 (d,  $J = 7.4$  Hz, 2H), 7.31 – 7.24 (m, 4H), 7.22 – 7.15 (m, 3H), 7.06 (t,  $J = 7.4$  Hz, 1H), 4.27 – 3.93 (m, 4H), 3.01 – 2.93 (m, 1H), 2.93 – 2.84 (m, 1H), 2.72 – 2.54 (m, 1H), 2.54 – 2.30 (m, 1H), 2.20 – 2.02 (m, 1H), 1.32 (t,  $J = 7.1$  Hz, 3H), 1.28 (t,  $J = 7.1$  Hz, 3H).

$^{13}\text{C}$  NMR (101 MHz,  $\text{CDCl}_3$ )  $\delta$  165.3, 140.7, 138.0, 128.8, 128.6, 128.5, 126.2, 124.2, 119.8, 63.2 (d,  $J = 6.7$  Hz), 62.6 (d,  $J = 6.7$  Hz), 45.8 (d,  $J = 129.0$  Hz), 34.1 (d,  $J = 14.6$  Hz), 28.5 (d,  $J = 4.3$  Hz), 16.4 (d,  $J = 6.5$  Hz), 16.3. (d,  $J = 6.3$  Hz).

$^{31}\text{P}$  NMR (162 MHz,  $\text{CDCl}_3$ )  $\delta$  25.42.

HRMS (ESI-TOF)  $m/z$ :  $[\text{M}+\text{H}]^+$  calcd for  $\text{C}_{20}\text{H}_{27}\text{NO}_4\text{P}^+$  376.1672; Found: 376.1678.



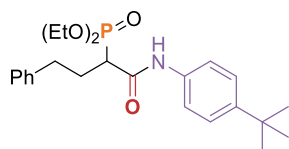

### Diethyl (1-((4-(tert-butyl)phenyl)amino)-1-oxo-4-phenylbutan-2-yl)phosphonate (3b)

This reaction was conducted on a 0.2 mmol scale with the general procedure. The crude product was purified by silica gel chromatography (PE/EA = 2:3) to afford the title compound as a brown liquid (63.8 mg, 74% yield). The identity of the product was confirmed by  $^1\text{H}$  NMR,  $^{13}\text{C}$  NMR,  $^{31}\text{P}$  NMR, and HRMS.

$^1\text{H}$  NMR (400 MHz,  $\text{CDCl}_3$ )  $\delta$  8.72 (s, 1H), 7.46 (d,  $J = 8.1$  Hz, 2H), 7.37 – 7.24 (m, 4H), 7.23 – 7.12 (m, 3H), 4.84 – 3.90 (m, 4H), 3.05 – 2.76 (m, 2H), 2.73 – 2.54 (m, 1H), 2.52 – 2.28 (m, 1H), 2.25 – 1.98 (m, 1H), 1.41 – 1.19 (m, 15H).

$^{13}\text{C}$  NMR (101 MHz,  $\text{CDCl}_3$ )  $\delta$  165.2, 147.1, 140.8, 135.3, 128.6, 128.4, 126.1, 125.6, 119.6, 63.1 (d,  $J = 6.5$  Hz), 62.6 (d,  $J = 6.4$  Hz), 45.8 (d,  $J = 128.7$  Hz), 34.3, 34.0 (d,  $J = 14.5$  Hz), 31.3, 28.5 (d,  $J = 4.3$  Hz), 16.4 (d,  $J = 6.1$  Hz), 16.3 (d,  $J = 6.4$  Hz).

$^{31}\text{P}$  NMR (162 MHz,  $\text{CDCl}_3$ )  $\delta$  25.49.

HRMS (ESI-TOF)  $m/z$ :  $[\text{M}+\text{H}]^+$  calcd for  $\text{C}_{24}\text{H}_{35}\text{NO}_4\text{P}^+$  432.2298; Found: 432.2305.

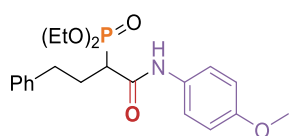

### Diethyl (1-((4-methoxyphenyl)amino)-1-oxo-4-phenylbutan-2-yl)phosphonate (3c)

This reaction was conducted on a 0.2 mmol scale with the general procedure. The crude product was purified by silica gel chromatography (PE/EA = 1:2) to afford the title compound as a brown liquid (34.0 mg, 42% yield). The identity of the product was confirmed by  $^1\text{H}$  NMR,  $^{13}\text{C}$  NMR,  $^{31}\text{P}$  NMR, and HRMS.

$^1\text{H}$  NMR (400 MHz,  $\text{CDCl}_3$ )  $\delta$  8.63 (s, 1H), 7.44 (d,  $J = 9.0$  Hz, 2H), 7.38 – 7.22 (m, 2H), 7.22 – 6.91 (m, 3H), 6.81 (d,  $J = 9.0$  Hz, 2H), 4.30 – 3.91 (m, 4H), 3.77 (s, 3H), 3.12 – 2.80 (m, 2H), 2.74 – 2.55 (m, 1H), 2.53 – 2.30 (m, 1H), 2.25 – 2.05 (m, 1H), 1.50 – 1.10 (m, 6H).

$^{13}\text{C}$  NMR (101 MHz,  $\text{CDCl}_3$ )  $\delta$  165.1, 156.3, 140.8, 131.2, 128.6, 128.4, 126.1, 121.5, 114.0, 63.1 (d,  $J = 6.7$  Hz), 62.6 (d,  $J = 6.8$  Hz), 55.4, 45.7 (d,  $J = 129.0$  Hz), 34.1 (d,  $J = 14.5$  Hz), 28.5 (d,  $J = 4.4$  Hz), 16.4 (d,  $J = 5.9$  Hz), 16.3 (d,  $J = 6.2$  Hz).

$^{31}\text{P}$  NMR (162 MHz,  $\text{CDCl}_3$ )  $\delta$  25.59.

HRMS (ESI-TOF)  $m/z$ :  $[\text{M}+\text{H}]^+$  calcd for  $\text{C}_{21}\text{H}_{29}\text{NO}_5\text{P}^+$  406.1778; Found: 406.1787.

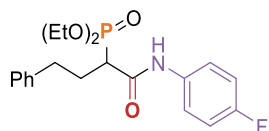

### Diethyl (1-((4-fluorophenyl)amino)-1-oxo-4-phenylbutan-2-yl)phosphonate (3d)

This reaction was conducted on a 0.2 mmol scale with the general procedure. The crude product was purified by silica gel chromatography (PE/EA = 2:3) to afford the title compound as a brown liquid (55.0 mg, 70% yield). The identity of the product was confirmed by  $^1\text{H}$  NMR,  $^{13}\text{C}$  NMR,  $^{19}\text{F}$  NMR,  $^{31}\text{P}$  NMR, and HRMS.

$^1\text{H}$  NMR (400 MHz,  $\text{CDCl}_3$ )  $\delta$  9.14 (s, 1H), 7.50 – 7.42 (m, 2H), 7.37 – 7.23 (m, 2H), 7.23 – 7.08 (m, 3H), 6.90 (t,  $J$  = 8.7 Hz, 2H), 4.26 – 4.09 (m, 2H), 4.08 – 3.88 (m, 2H), 3.07 – 2.92 (m, 1H), 2.89 – 2.73 (m, 1H), 2.73 – 2.54 (m, 1H), 2.54 – 2.29 (m, 1H), 2.18 – 1.96 (m, 1H), 1.34 (t,  $J$  = 7.1 Hz, 3H), 1.26 (t,  $J$  = 7.1 Hz, 3H).

$^{13}\text{C}$  NMR (101 MHz,  $\text{CDCl}_3$ )  $\delta$  165.4 (d,  $J$  = 2.5 Hz), 159.2 (d,  $J$  = 243.1 Hz), 140.7, 134.2 (d,  $J$  = 2.8 Hz), 128.6, 128.4, 126.2, 121.3 (d,  $J$  = 7.8 Hz), 115.3 (d,  $J$  = 22.4 Hz), 63.4 (d,  $J$  = 6.6 Hz), 62.4 (d,  $J$  = 6.8 Hz), 45.7 (d,  $J$  = 129.1 Hz), 34.1 (d,  $J$  = 15.0 Hz), 28.5 (d,  $J$  = 4.7 Hz), 16.4 (d,  $J$  = 5.9 Hz), 16.3 (d,  $J$  = 6.0 Hz).

$^{19}\text{F}$  NMR (376 MHz,  $\text{CDCl}_3$ )  $\delta$  -118.54.

$^{31}\text{P}$  NMR (162 MHz,  $\text{CDCl}_3$ )  $\delta$  25.33.

HRMS (ESI-TOF)  $m/z$ :  $[\text{M}+\text{H}]^+$  calcd for  $\text{C}_{20}\text{H}_{26}\text{FNO}_4\text{P}^+$  394.1578; Found: 394.1582.

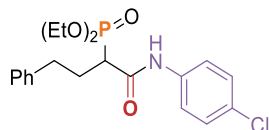

### Diethyl (1-((4-chlorophenyl)amino)-1-oxo-4-phenylbutan-2-yl)phosphonate (3e)

This reaction was conducted on a 0.2 mmol scale with the general procedure. The crude product was purified by silica gel chromatography (PE/EA = 2:3) to afford the title compound as a brown liquid (67.9 mg, 83% yield). The identity of the product was confirmed by  $^1\text{H}$  NMR,  $^{13}\text{C}$  NMR,  $^{31}\text{P}$  NMR, and HRMS.

$^1\text{H}$  NMR (400 MHz,  $\text{CDCl}_3$ )  $\delta$  9.43 (s, 1H), 7.42 (d,  $J$  = 8.8 Hz, 2H), 7.27 (t,  $J$  = 7.4 Hz, 2H), 7.18 (t,  $J$  = 7.6 Hz, 3H), 7.12 (d,  $J$  = 8.9 Hz, 2H), 4.28 – 4.09 (m, 2H), 4.09 – 3.75 (m, 2H), 3.35 – 2.94 (m, 1H), 2.94 – 2.75 (m, 1H), 2.69 – 2.51 (m, 1H), 2.51 – 2.31 (m, 1H), 2.26 – 1.96 (m, 1H), 1.35 (t,  $J$  = 7.1 Hz, 3H), 1.24 (t,  $J$  = 7.0 Hz, 3H).

$^{13}\text{C}$  NMR (101 MHz,  $\text{CDCl}_3$ )  $\delta$  165.5 (d,  $J$  = 2.8 Hz), 140.7, 136.8, 128.8, 128.61, 128.56, 128.4, 126.1, 120.7, 63.5 (d,  $J$  = 6.6 Hz), 62.2 (d,  $J$  = 6.9 Hz), 45.9 (d,  $J$  = 129.4 Hz), 34.1 (d,  $J$  = 15.2 Hz), 28.5 (d,  $J$  = 4.8 Hz), 16.4 (d,  $J$  = 5.9 Hz), 16.2 (d,  $J$  = 6.1 Hz).

$^{31}\text{P}$  NMR (162 MHz,  $\text{CDCl}_3$ )  $\delta$  25.14.

HRMS (ESI-TOF)  $m/z$ :  $[\text{M}+\text{H}]^+$  calcd for  $\text{C}_{20}\text{H}_{26}\text{ClNO}_4\text{P}^+$  410.1282; Found: 410.1286.

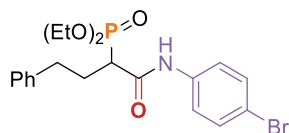

### Diethyl (1-((4-bromophenyl)amino)-1-oxo-4-phenylbutan-2-yl)phosphonate (3f)

This reaction was conducted on a 0.2 mmol scale with the general procedure. The crude product was purified by silica gel chromatography (PE/EA = 2:3) to afford the title compound as a brown liquid (73.4 mg, 81% yield). The identity of the product was confirmed by  $^1\text{H}$  NMR,  $^{13}\text{C}$  NMR,  $^{31}\text{P}$  NMR, and HRMS.

$^1\text{H}$  NMR (400 MHz,  $\text{CDCl}_3$ )  $\delta$  9.35 (s, 1H), 7.38 (d,  $J = 8.9$  Hz, 2H), 7.33 – 7.23 (m, 4H), 7.23 – 7.11 (m, 3H), 4.33 – 4.08 (m, 2H), 4.06 – 3.84 (m, 2H), 3.28 – 2.92 (m, 1H), 2.91 – 2.73 (m, 1H), 2.62 – 2.52 (m, 1H), 2.51 – 2.37 (m, 1H), 2.26 – 1.95 (m, 1H), 1.34 (t,  $J = 7.0$  Hz, 3H), 1.25 (t,  $J = 7.0$  Hz, 3H).

$^{13}\text{C}$  NMR (101 MHz,  $\text{CDCl}_3$ )  $\delta$  165.5 (d,  $J = 2.7$  Hz), 140.7, 137.2, 131.6, 128.6, 128.4, 126.1, 121.0, 116.5, 63.5 (d,  $J = 6.7$  Hz), 62.3 (d,  $J = 6.9$  Hz), 45.9 (d,  $J = 129.0$  Hz), 34.1 (d,  $J = 15.1$  Hz), 28.5 (d,  $J = 4.8$  Hz), 16.4 (d,  $J = 5.8$  Hz), 16.3 (d,  $J = 6.2$  Hz).

$^{31}\text{P}$  NMR (162 MHz,  $\text{CDCl}_3$ )  $\delta$  25.16.

HRMS (ESI-TOF)  $m/z$ :  $[\text{M}+\text{H}]^+$  calcd for  $\text{C}_{20}\text{H}_{26}\text{BrNO}_4\text{P}^+$  454.0777; Found: 454.0781.

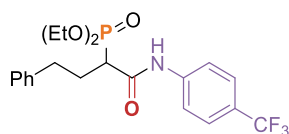

### Diethyl (1-oxo-4-phenyl-1-((4-(trifluoromethyl)phenyl)amino)butan-2-yl)phosphonate (3g)

This reaction was conducted on a 0.2 mmol scale with the general procedure. The crude product was purified by silica gel chromatography (PE/EA = 2:3) to afford the title compound as a brown liquid (61.1 mg, 69% yield). The identity of the product was confirmed by  $^1\text{H}$  NMR,  $^{13}\text{C}$  NMR,  $^{19}\text{F}$  NMR,  $^{31}\text{P}$  NMR, and HRMS.

$^1\text{H}$  NMR (400 MHz,  $\text{CDCl}_3$ )  $\delta$  9.64 (s, 1H), 7.57 (d,  $J = 8.4$  Hz, 2H), 7.39 (d,  $J = 8.5$  Hz, 2H), 7.35 – 7.23 (m, 2H), 7.23 – 6.98 (m, 3H), 4.28 – 4.10 (m, 2H), 4.06 – 3.80 (m, 2H), 3.17 – 2.94 (m, 1H), 2.91 – 2.75 (m, 1H), 2.66 – 2.54 (m, 1H), 2.53 – 2.38 (m, 1H), 2.20 – 1.96 (m, 1H), 1.37 (t,  $J = 7.1$  Hz, 3H), 1.25 (t,  $J = 7.1$  Hz, 3H).

$^{13}\text{C}$  NMR (101 MHz,  $\text{CDCl}_3$ )  $\delta$  165.9, 141.2, 140.6, 128.6, 128.5, 127.2 (q,  $J = 271.4$  Hz), 126.2, 125.9, 125.4, 119.0, 63.5 (d,  $J = 6.7$  Hz), 62.3 (d,  $J = 6.9$  Hz), 45.9 (d,  $J = 129.0$  Hz), 34.1 (d,  $J = 15.1$  Hz), 28.5 (d,  $J = 4.8$  Hz), 16.4 (d,  $J = 5.8$  Hz), 16.3 (d,  $J = 6.2$  Hz).

$^{19}\text{F}$  NMR (376 MHz,  $\text{CDCl}_3$ )  $\delta$  -62.25.

$^{31}\text{P}$  NMR (162 MHz,  $\text{CDCl}_3$ )  $\delta$  25.01.

HRMS (ESI-TOF)  $m/z$ :  $[\text{M}+\text{H}]^+$  calcd for  $\text{C}_{21}\text{H}_{26}\text{F}_3\text{NO}_4\text{P}^+$  444.1546; Found: 444.1549.

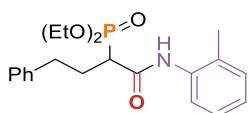

### Diethyl (1-oxo-4-phenyl-1-(*o*-tolylamino)butan-2-yl)phosphonate (3h)

This reaction was conducted on a 0.2 mmol scale with the general procedure. The crude product was purified by silica gel chromatography (PE/EA = 2:3) to afford the title compound as a brown liquid (51.3 mg, 66% yield). The identity of the product was confirmed by  $^1\text{H}$  NMR,  $^{13}\text{C}$  NMR,  $^{31}\text{P}$  NMR, and HRMS.

$^1\text{H}$  NMR (400 MHz,  $\text{CDCl}_3$ )  $\delta$  8.37 (s, 1H), 7.89 (d,  $J = 7.9$  Hz, 1H), 7.33 – 7.26 (m, 2H), 7.25 – 7.16 (m, 5H), 7.07 (t,  $J = 7.5$  Hz, 1H), 4.53 – 3.98 (m, 4H), 3.01 – 2.86 (m, 2H), 2.83 – 2.60 (m, 1H), 2.48 – 2.35 (m, 1H), 2.33 (s, 3H), 2.27 – 2.06 (m, 1H), 1.34 – 1.26 (m, 6H).

$^{13}\text{C}$  NMR (101 MHz,  $\text{CDCl}_3$ )  $\delta$  165.3 (d,  $J = 1.9$  Hz), 140.7, 135.8, 130.5, 129.0, 128.6, 128.5, 126.6, 126.2, 125.0, 122.5, 63.0 (d,  $J = 6.9$  Hz), 62.8 (d,  $J = 6.8$  Hz), 45.6 (d,  $J = 128.5$  Hz), 34.1 (d,  $J = 14.2$  Hz), 28.7 (d,  $J = 4.3$  Hz), 16.4 (d,  $J = 4.3$  Hz), 16.3 (d,  $J = 4.5$  Hz).

$^{31}\text{P}$  NMR (162 MHz,  $\text{CDCl}_3$ )  $\delta$  25.89.

HRMS (ESI-TOF)  $m/z$ :  $[\text{M}+\text{H}]^+$  calcd for  $\text{C}_{21}\text{H}_{29}\text{NO}_4\text{P}^+$  390.1829; Found: 390.1834.

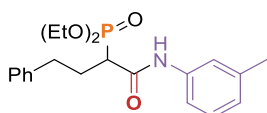

### Diethyl (1-oxo-4-phenyl-1-(*m*-tolylamino)butan-2-yl)phosphonate (3i)

This reaction was conducted on a 0.2 mmol scale with the general procedure. The crude product was purified by silica gel chromatography (PE/EA = 2:3) to afford the title compound as a brown liquid (63.8 mg, 82% yield). The identity of the product was confirmed by  $^1\text{H}$  NMR,  $^{13}\text{C}$  NMR,  $^{31}\text{P}$  NMR and HRMS.

$^1\text{H}$  NMR (400 MHz,  $\text{CDCl}_3$ )  $\delta$  8.92 (s, 1H), 7.38 – 7.31 (m, 2H), 7.31 – 7.24 (m, 2H), 7.23 – 7.15 (m, 3H), 7.13 (t,  $J = 7.8$  Hz, 1H), 6.86 (d,  $J = 7.5$  Hz, 1H), 4.28 – 4.11 (m, 2H), 4.11 – 3.90 (m, 2H), 3.17 – 2.91 (m, 1H), 2.91 – 2.75 (m, 1H), 2.74 – 2.55 (m, 1H), 2.56 – 2.35 (m, 1H), 2.28 (s, 3H), 2.19 – 1.99 (m, 1H), 1.32 (t,  $J = 7.0$  Hz, 3H), 1.27 (t,  $J = 7.0$  Hz, 3H).

$^{13}\text{C}$  NMR (101 MHz,  $\text{CDCl}_3$ )  $\delta$  165.3 (d,  $J = 2.5$  Hz), 140.8, 138.6, 137.9, 128.62, 128.57, 128.4, 126.1, 124.9, 120.3, 116.8, 63.2 (d,  $J = 6.8$  Hz), 62.5 (d,  $J = 6.7$  Hz), 45.8 (d,  $J = 128.8$  Hz), 34.1 (d,  $J = 14.9$  Hz), 28.5 (d,  $J = 4.7$  Hz), 21.4, 16.4 (d,  $J = 5.9$  Hz), 16.3 (d,  $J = 6.0$  Hz).

$^{31}\text{P}$  NMR (162 MHz,  $\text{CDCl}_3$ )  $\delta$  25.43.

HRMS (ESI-TOF)  $m/z$ :  $[\text{M}+\text{H}]^+$  calcd for  $\text{C}_{21}\text{H}_{29}\text{NO}_4\text{P}^+$  390.1829; Found: 390.1835.

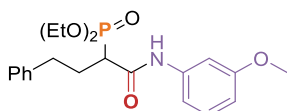

### Diethyl (1-((3-methoxyphenyl)amino)-1-oxo-4-phenylbutan-2-yl)phosphonate (3j)

This reaction was conducted on a 0.2 mmol scale with the general procedure. The crude product was purified by silica gel chromatography (PE/EA = 1:2) to afford the title compound as a brown liquid

(64.0 mg, 79% yield). The identity of the product was confirmed by  $^1\text{H}$  NMR,  $^{13}\text{C}$  NMR,  $^{31}\text{P}$  NMR and HRMS.

**$^1\text{H}$  NMR (400 MHz,  $\text{CDCl}_3$ )**  $\delta$  9.17 (s, 1H), 7.31 – 7.24 (m, 2H), 7.24 – 7.13 (m, 4H), 7.13 – 6.99 (m, 2H), 6.57 (d,  $J = 7.6$  Hz, 1H), 4.23 – 4.09 (m, 2H), 4.09 – 3.89 (m, 2H), 3.75 (s, 3H), 3.10 – 2.95 (m, 1H), 2.94 – 2.77 (m, 1H), 2.70 – 2.55 (m, 1H), 2.53 – 2.29 (m, 1H), 2.21 – 2.00 (m, 1H), 1.33 (t,  $J = 7.1$  Hz, 3H), 1.26 (t,  $J = 7.1$  Hz, 3H).

**$^{13}\text{C}$  NMR (101 MHz,  $\text{CDCl}_3$ )**  $\delta$  165.4 (d,  $J = 2.8$  Hz), 159.8, 140.7, 139.3, 129.3, 128.6, 128.4, 126.1, 111.8, 110.2, 104.9, 63.3 (d,  $J = 6.7$  Hz), 62.3 (d,  $J = 6.8$  Hz), 55.1, 45.9 (d,  $J = 129.2$  Hz), 34.0 (d,  $J = 15.0$  Hz), 28.5 (d,  $J = 4.6$  Hz), 16.4 (d,  $J = 5.9$  Hz), 16.2 (d,  $J = 6.2$  Hz).

**$^{31}\text{P}$  NMR (162 MHz,  $\text{CDCl}_3$ )**  $\delta$  25.31.

**HRMS (ESI-TOF) m/z:**  $[\text{M}+\text{H}]^+$  calcd for  $\text{C}_{21}\text{H}_{29}\text{NO}_5\text{P}^+$  406.1778; Found: 406.1781.

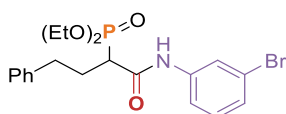

### Diethyl (1-((3-bromophenyl)amino)-1-oxo-4-phenylbutan-2-yl)phosphonate(3k)

This reaction was conducted on a 0.2 mmol scale with the general procedure. The crude product was purified by silica gel chromatography (PE/EA = 2:3) to afford the title compound as a brown liquid (59.8 mg, 66% yield). The identity of the product was confirmed by  $^1\text{H}$  NMR,  $^{13}\text{C}$  NMR,  $^{31}\text{P}$  NMR and HRMS.

**$^1\text{H}$  NMR (400 MHz,  $\text{CDCl}_3$ )**  $\delta$  9.47 (s, 1H), 7.76 (t,  $J = 2.0$  Hz, 1H), 7.39 (d,  $J = 8.2$  Hz, 1H), 7.34 – 7.24 (m, 2H), 7.23 – 7.15 (m, 3H), 7.10 (d,  $J = 8.9$  Hz, 1H), 7.01 (t,  $J = 8.0$  Hz, 1H), 4.35 – 4.14 (m, 3H), 4.09 – 3.82 (m, 2H), 3.11 – 2.95 (m, 1H), 2.91 – 2.76 (m, 1H), 2.68 – 2.52 (m, 1H), 2.20 – 1.96 (m, 1H), 1.36 (t,  $J = 7.0$  Hz, 3H), 1.25 (t,  $J = 7.1$  Hz, 3H).

**$^{13}\text{C}$  NMR (101 MHz,  $\text{CDCl}_3$ )**  $\delta$  165.5, 140.7, 139.4, 129.9, 128.64, 128.60, 128.4, 126.8, 126.1, 122.3, 117.8, 63.6 (d,  $J = 6.5$  Hz), 62.3 (d,  $J = 6.7$  Hz), 45.8 (d,  $J = 129.0$  Hz), 34.0 (d,  $J = 15.2$  Hz), 28.5 (d,  $J = 5.0$  Hz), 16.4 (d,  $J = 5.8$  Hz), 16.3 (d,  $J = 6.1$  Hz).

**$^{31}\text{P}$  NMR (162 MHz,  $\text{CDCl}_3$ )**  $\delta$  25.14.

**HRMS (ESI-TOF) m/z:**  $[\text{M}+\text{H}]^+$  calcd for  $\text{C}_{20}\text{H}_{26}\text{BrNO}_4\text{P}^+$  454.0777; Found: 454.0782

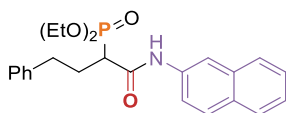

### Diethyl (1-(naphthalen-2-ylamino)-1-oxo-4-phenylbutan-2-yl)phosphonate (3l)

This reaction was conducted on a 0.2 mmol scale with the general procedure. The crude product was purified by silica gel chromatography (PE/EA = 2:3) to afford the title compound as a brown liquid (73.1 mg, 86% yield). The identity of the product was confirmed by  $^1\text{H}$  NMR,  $^{13}\text{C}$  NMR,  $^{31}\text{P}$  NMR and HRMS.

**$^1\text{H}$  NMR (400 MHz,  $\text{CDCl}_3$ )**  $\delta$  9.37 (s, 1H), 8.19 (s, 1H), 7.64 (d,  $J = 8.1$  Hz, 1H), 7.58 (d,  $J = 8.1$  Hz, 1H), 7.54 (d,  $J = 8.8$  Hz, 1H), 7.42 (d,  $J = 8.9$  Hz, 1H), 7.35 (t,  $J = 7.5$  Hz, 1H), 7.32 – 7.23 (m, 3H), 7.22 – 7.14 (m, 3H), 4.33 – 4.14 (m, 2H), 4.12 – 3.94 (m, 2H), 3.17 – 2.99 (m, 1H), 2.96 – 2.82 (m,

1H), 2.76 – 2.59 (m, 1H), 2.57 – 2.43 (m, 1H), 2.29 – 2.03 (m, 1H), 1.36 (t,  $J = 7.1$  Hz, 3H), 1.28 (t,  $J = 7.1$  Hz, 3H).

$^{13}\text{C}$  NMR (101 MHz,  $\text{CDCl}_3$ )  $\delta$  165.6 (d,  $J = 2.8$  Hz), 140.8, 135.6, 133.6, 130.4, 128.6, 128.4, 128.3, 127.5, 127.3, 126.10, 126.09, 124.6, 119.6, 116.3, 63.4 (d,  $J = 6.7$  Hz), 62.4 (d,  $J = 6.9$  Hz), 46.0 (d,  $J = 128.9$  Hz), 34.1 (d,  $J = 15.0$  Hz), 28.6 (d,  $J = 4.7$  Hz), 16.4 (d,  $J = 5.9$  Hz), 16.3 (d,  $J = 6.0$  Hz).

$^{31}\text{P}$  NMR (162 MHz,  $\text{CDCl}_3$ )  $\delta$  25.39.

HRMS (ESI-TOF)  $m/z$ :  $[\text{M}+\text{H}]^+$  calcd for  $\text{C}_{24}\text{H}_{29}\text{NO}_4\text{P}^+$  426.1829; Found: 426.1833.

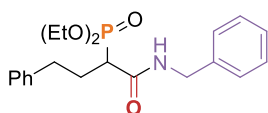

### Diethyl (1-(benzylamino)-1-oxo-4-phenylbutan-2-yl)phosphonate (3m)

This reaction was conducted on a 0.2 mmol scale with the general procedure. The crude product was purified by silica gel chromatography (PE/EA = 2:3) to afford the title compound as a brown liquid (48.2 mg, 62% yield). The identity of the product was confirmed by  $^1\text{H}$  NMR,  $^{13}\text{C}$  NMR,  $^{31}\text{P}$  NMR and HRMS.

$^1\text{H}$  NMR (400 MHz,  $\text{CDCl}_3$ )  $\delta$  7.32 (d,  $J = 4.4$  Hz, 4H), 7.30 – 7.24 (m, 3H), 7.23 – 7.14 (m, 3H), 6.79 (s, 1H), 4.60 – 4.41 (m, 2H), 4.19 – 3.90 (m, 4H), 2.87 – 2.78 (m, 1H), 2.77 – 2.69 (m, 1H), 2.68 – 2.54 (m, 1H), 2.45 – 2.22 (m, 1H), 2.18 – 2.00 (m, 1H), 1.30 – 1.19 (m, 6H).

$^{13}\text{C}$  NMR (101 MHz,  $\text{CDCl}_3$ )  $\delta$  167.1 (d,  $J = 2.3$  Hz), 140.7, 138.1, 128.58, 128.56, 128.4, 127.7, 127.4, 126.1, 62.7 (d,  $J = 6.8$  Hz), 62.6 (d,  $J = 6.7$  Hz), 45.1 (d,  $J = 129.5$  Hz), 43.8, 34.0 (d,  $J = 14.8$  Hz), 28.5 (d,  $J = 4.4$  Hz), 16.3 (d,  $J = 2.2$  Hz), 16.2 (d,  $J = 2.3$  Hz).

$^{31}\text{P}$  NMR (162 MHz,  $\text{CDCl}_3$ )  $\delta$  25.43.

HRMS (ESI-TOF)  $m/z$ :  $[\text{M}+\text{H}]^+$  calcd for  $\text{C}_{21}\text{H}_{29}\text{NO}_4\text{P}^+$  390.1829; Found: 390.1834.

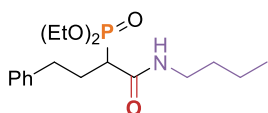

### Diethyl (1-(butylamino)-1-oxo-4-phenylbutan-2-yl)phosphonate (3n)

This reaction was conducted on a 0.2 mmol scale with the general procedure. The crude product was purified by silica gel chromatography (PE/EA = 1:3) to afford the title compound as a brown liquid (59.6 mg, 84% yield). The identity of the product was confirmed by  $^1\text{H}$  NMR,  $^{13}\text{C}$  NMR,  $^{31}\text{P}$  NMR and HRMS.

$^1\text{H}$  NMR (400 MHz,  $\text{CDCl}_3$ )  $\delta$  7.33 – 7.25 (m, 2H), 7.23 – 7.12 (m, 3H), 6.49 (s, 1H), 4.20 – 3.92 (m, 4H), 3.47 – 3.07 (m, 2H), 3.00 – 2.77 (m, 1H), 2.77 – 2.52 (m, 2H), 2.41 – 2.19 (m, 1H), 2.15 – 2.00 (m, 1H), 1.57 – 1.47 (m, 2H), 1.45 – 1.34 (m, 2H), 1.34 – 1.23 (m, 6H), 0.93 (t,  $J = 7.3$  Hz, 3H).

$^{13}\text{C}$  NMR (101 MHz,  $\text{CDCl}_3$ )  $\delta$  167.0 (d,  $J = 2.3$  Hz), 140.8, 128.5, 128.4, 126.1, 62.7 (d,  $J = 6.8$  Hz), 62.5 (d,  $J = 6.8$  Hz), 45.1 (d,  $J = 129.4$  Hz), 39.5, 34.0 (d,  $J = 14.7$  Hz), 31.5, 28.6 (d,  $J = 4.4$  Hz), 19.9, 16.34 (d,  $J = 3.1$  Hz), 16.28 (d,  $J = 3.0$  Hz), 13.6.

$^{31}\text{P}$  NMR (162 MHz,  $\text{CDCl}_3$ )  $\delta$  25.83.

HRMS (ESI-TOF)  $m/z$ :  $[\text{M}+\text{H}]^+$  calcd for  $\text{C}_{18}\text{H}_{31}\text{NO}_4\text{P}^+$  356.1985; Found: 356.1991.

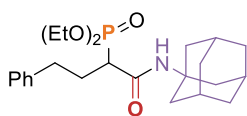

### Diethyl (1-(((3s,5s,7s)-adamantan-1-yl)amino)-1-oxo-4-phenylbutan-2-yl)phosphonate (3o)

This reaction was conducted on a 0.2 mmol scale with the general procedure. The crude product was purified by silica gel chromatography (PE/EA = 1:3) to afford the title compound as a brown liquid (66.7 mg, 77% yield). The identity of the product was confirmed by  $^1\text{H}$  NMR,  $^{13}\text{C}$  NMR,  $^{31}\text{P}$  NMR and HRMS.

$^1\text{H}$  NMR (400 MHz,  $\text{CDCl}_3$ )  $\delta$  7.32 – 7.25 (m, 2H), 7.24 – 7.14 (m, 3H), 6.03 (s, 1H), 4.36 – 3.87 (m, 4H), 2.86 – 2.75 (m, 1H), 2.72 – 2.48 (m, 2H), 2.39 – 2.17 (m, 1H), 2.15 – 1.99 (m, 10H), 1.77 – 1.62 (m, 6H), 1.33 – 1.23 (m, 6H).

$^{13}\text{C}$  NMR (101 MHz,  $\text{CDCl}_3$ )  $\delta$  165.8 (d,  $J = 2.3$  Hz), 141.0, 128.6, 128.4, 126.1, 62.6 (d,  $J = 6.7$  Hz), 62.5 (d,  $J = 6.7$  Hz), 52.3, 46.0 (d,  $J = 128.5$  Hz), 41.4, 36.3, 34.0 (d,  $J = 14.9$  Hz), 29.4, 28.7 (d,  $J = 4.3$  Hz), 16.43 (d,  $J = 1.7$  Hz), 16.57 (d,  $J = 1.6$  Hz).

$^{31}\text{P}$  NMR (162 MHz,  $\text{CDCl}_3$ )  $\delta$  26.04.

HRMS (ESI-TOF)  $m/z$ :  $[\text{M}+\text{H}]^+$  calcd for  $\text{C}_{24}\text{H}_{37}\text{NO}_4\text{P}^+$  434.2455; Found: 434.2460

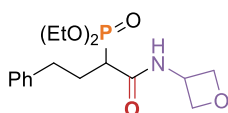

### Diethyl (1-(oxetan-3-ylamino)-1-oxo-4-phenylbutan-2-yl)phosphonate (3p)

This reaction was conducted on a 0.2 mmol scale with the general procedure. The crude product was purified by silica gel chromatography (PE/*i*PrOH = 4:1) to afford the title compound as a brown liquid (44.7 mg, 63% yield). The identity of the product was confirmed by  $^1\text{H}$  NMR,  $^{13}\text{C}$  NMR,  $^{31}\text{P}$  NMR and HRMS.

$^1\text{H}$  NMR (400 MHz,  $\text{CDCl}_3$ )  $\delta$  7.44 (s, 1H), 7.38 – 7.24 (m, 2H), 7.24 – 7.00 (m, 3H), 5.09 – 4.96 (m, 1H), 4.96 – 4.84 (m, 2H), 4.53 (t,  $J = 6.4$  Hz, 2H), 4.33 – 3.97 (m, 4H), 2.97 – 2.69 (m, 2H), 2.69 – 2.43 (m, 1H), 2.42 – 2.24 (m, 1H), 2.16 – 1.95 (m, 1H), 1.36 – 1.26 (m, 6H).

$^{13}\text{C}$  NMR (101 MHz,  $\text{CDCl}_3$ )  $\delta$  167.0 (d,  $J = 2.5$  Hz), 140.6, 128.5, 128.4, 126.2, 78.2, 78.0, 63.0 (d,  $J = 6.7$  Hz), 62.5 (d,  $J = 6.7$  Hz), 45.1, 44.8 (d,  $J = 129.9$  Hz), 34.0 (d,  $J = 14.5$  Hz), 28.2 (d,  $J = 4.7$  Hz), 16.31 (d,  $J = 3.8$  Hz), 16.26 (d,  $J = 3.9$  Hz).

$^{31}\text{P}$  NMR (162 MHz,  $\text{CDCl}_3$ )  $\delta$  24.99.

HRMS (ESI-TOF)  $m/z$ :  $[\text{M}+\text{H}]^+$  calcd for  $\text{C}_{17}\text{H}_{27}\text{NO}_5\text{P}^+$  356.1621; Found: 356.1625.

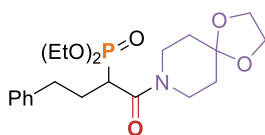

### Diethyl (1-oxo-4-phenyl-1-(1,4-dioxo-8-azaspiro[4.5]decan-8-yl)butan-2-yl)phosphonate (3q)

This reaction was conducted on a 0.2 mmol scale with the general procedure. The crude product was purified by silica gel chromatography (PE/*i*PrOH = 7:3) to afford the title compound as a brown liquid



(62.1 mg, 73% yield). The identity of the product was confirmed by  $^1\text{H}$  NMR,  $^{13}\text{C}$  NMR,  $^{31}\text{P}$  NMR and HRMS.

**$^1\text{H}$  NMR (400 MHz,  $\text{CDCl}_3$ )**  $\delta$  7.28 (t,  $J = 7.4$  Hz, 2H), 7.19 (t,  $J = 7.4$  Hz, 1H), 7.14 (d,  $J = 6.8$  Hz, 2H), 4.19 – 4.04 (m, 4H), 3.97 (s, 4H), 3.90 – 3.68 (m, 2H), 3.57 – 3.35 (m, 2H), 3.32 – 3.13 (m, 1H), 3.00 – 2.70 (m, 1H), 2.59 – 2.40 (m, 2H), 2.31 – 2.08 (m, 1H), 1.87 – 1.73 (m, 1H), 1.69 (q,  $J = 5.6$ , 5.2 Hz, 2H), 1.61 – 1.51 (m, 1H), 1.37 – 1.17 (m, 6H).

**$^{13}\text{C}$  NMR (101 MHz,  $\text{CDCl}_3$ )**  $\delta$  166.0 (d,  $J = 4.5$  Hz), 140.5, 128.6, 128.4, 126.2, 106.8, 64.4, 62.6 (d,  $J = 4.2$  Hz), 62.5 (d,  $J = 4.4$  Hz), 44.4, 40.4, 40.1 (d,  $J = 132.9$  Hz), 35.2, 34.8, 33.8 (d,  $J = 15.7$  Hz), 28.8 (d,  $J = 4.4$  Hz), 16.41 (d,  $J = 2.8$  Hz), 16.35 (d,  $J = 3.1$  Hz).

**$^{31}\text{P}$  NMR (162 MHz,  $\text{CDCl}_3$ )**  $\delta$  24.11.

**HRMS (ESI-TOF)  $m/z$ :**  $[\text{M}+\text{H}]^+$  calcd for  $\text{C}_{21}\text{H}_{33}\text{NO}_6\text{P}^+$  426.2040; Found: 426.2044.

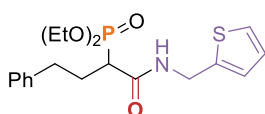

### Diethyl (1-oxo-4-phenyl-1-((thiophen-2-ylmethyl)amino)butan-2-yl)phosphonate (3r)

This reaction was conducted on a 0.2 mmol scale with the general procedure. The crude product was purified by silica gel chromatography (PE/EA = 2:3) to afford the title compound as a brown liquid (59.3 mg, 75% yield). The identity of the product was confirmed by  $^1\text{H}$  NMR,  $^{13}\text{C}$  NMR,  $^{31}\text{P}$  NMR and HRMS.

**$^1\text{H}$  NMR (400 MHz,  $\text{CDCl}_3$ )**  $\delta$  7.31 – 7.24 (m, 2H), 7.23 – 7.14 (m, 4H), 7.03 – 6.98 (m, 1H), 6.97 – 6.90 (m, 1H), 6.83 (s, 1H), 4.65 (d,  $J = 5.7$  Hz, 2H), 4.36 – 3.89 (m, 4H), 2.87 – 2.67 (m, 2H), 2.67 – 2.54 (m, 1H), 2.43 – 2.22 (m, 1H), 2.18 – 1.97 (m, 1H), 1.35 – 1.18 (m, 6H).

**$^{13}\text{C}$  NMR (101 MHz,  $\text{CDCl}_3$ )**  $\delta$  167.0 (d,  $J = 2.3$  Hz), 140.72, 140.68, 128.6, 128.4, 126.8, 126.1, 126.1, 125.1, 62.8 (d,  $J = 6.8$  Hz), 62.7 (d,  $J = 6.8$  Hz), 45.0 (d,  $J = 129.6$  Hz), 38.5, 34.0 (d,  $J = 14.5$  Hz), 28.5 (d,  $J = 4.3$  Hz), 16.32 (d,  $J = 2.6$  Hz), 16.26 (d,  $J = 2.7$  Hz).

**$^{31}\text{P}$  NMR (162 MHz,  $\text{CDCl}_3$ )**  $\delta$  25.25.

**HRMS (ESI-TOF)  $m/z$ :**  $[\text{M}+\text{H}]^+$  calcd for  $\text{C}_{19}\text{H}_{27}\text{NO}_4\text{SP}^+$  396.1393; Found: 396.1401.

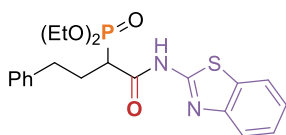

### Diethyl (1-(benzo[d]thiazol-2-ylamino)-1-oxo-4-phenylbutan-2-yl)phosphonate (3s)

This reaction was conducted on a 0.2 mmol scale with the general procedure. The crude product was purified by silica gel chromatography (PE/EA = 1:3) to afford the title compound as a brown liquid (63.1 mg, 73% yield). The identity of the product was confirmed by  $^1\text{H}$  NMR,  $^{13}\text{C}$  NMR,  $^{31}\text{P}$  NMR and HRMS.

**$^1\text{H}$  NMR (400 MHz,  $\text{CDCl}_3$ )**  $\delta$  11.36 (s, 1H), 7.74 – 7.55 (m, 2H), 7.38 – 7.28 (m, 1H), 7.28 – 7.21 (m, 2H), 7.21 – 7.09 (m, 4H), 4.34 – 4.13 (m, 2H), 4.16 – 3.79 (m, 2H), 3.35 – 3.10 (m, 1H), 3.00 – 2.68 (m, 1H), 2.68 – 2.43 (m, 2H), 2.31 – 2.05 (m, 1H), 1.33 (t,  $J = 7.1$  Hz, 3H), 1.26 (t,  $J = 7.1$  Hz, 3H).



$^{13}\text{C}$  NMR (101 MHz,  $\text{CDCl}_3$ )  $\delta$  166.4 (d,  $J = 3.7$  Hz), 157.6, 148.4, 140.3, 132.1, 128.6, 128.5, 126.2, 125.8, 123.6, 121.0 (d,  $J = 2.3$  Hz), 63.8 (d,  $J = 6.5$  Hz), 62.8 (d,  $J = 6.6$  Hz), 45.4 (d,  $J = 128.9$  Hz), 34.0 (d,  $J = 14.6$  Hz), 28.1 (d,  $J = 4.6$  Hz), 16.4 (d,  $J = 5.9$  Hz), 16.3 (d,  $J = 5.9$  Hz).

$^{31}\text{P}$  NMR (162 MHz,  $\text{CDCl}_3$ )  $\delta$  22.98.

HRMS (ESI-TOF)  $m/z$ :  $[\text{M}+\text{H}]^+$  calcd for  $\text{C}_{21}\text{H}_{26}\text{N}_2\text{O}_4\text{SP}^+$  433.1345; Found: 433.1347.

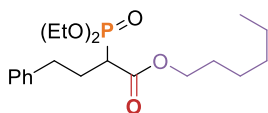

#### Hexyl 2-(diethoxyphosphoryl)-4-phenylbutanoate (4a)

This reaction was conducted on a 0.2 mmol scale with the general procedure. The crude product was purified by silica gel chromatography (PE/EA = 2:1) to afford the title compound as a colorless liquid (70.7 mg, 92% yield). The identity of the product was confirmed by  $^1\text{H}$  NMR,  $^{13}\text{C}$  NMR,  $^{31}\text{P}$  NMR, and HRMS.

$^1\text{H}$  NMR (400 MHz,  $\text{CDCl}_3$ )  $\delta$  7.33 – 7.25 (m, 2H), 7.24 – 7.12 (m, 3H), 4.32 – 3.99 (m, 6H), 3.03 – 2.85 (m, 1H), 2.84 – 2.65 (m, 1H), 2.65 – 2.52 (m, 1H), 2.44 – 2.24 (m, 1H), 2.24 – 2.00 (m, 1H), 1.75 – 1.61 (m, 2H), 1.44 – 1.21 (m, 12H), 1.05 – 0.80 (t,  $J = 6.7$  Hz, 3H).

$^{13}\text{C}$  NMR (101 MHz,  $\text{CDCl}_3$ )  $\delta$  169.1 (d,  $J = 5.0$  Hz), 140.4, 128.5, 128.4, 126.2, 65.6, 62.7 (d,  $J = 6.2$  Hz), 62.6 (d,  $J = 6.7$  Hz), 45.0 (d,  $J = 130.9$  Hz), 34.3 (d,  $J = 15.4$  Hz), 31.4, 28.6 (d,  $J = 4.5$  Hz), 28.5, 25.5, 22.5, 16.4 (d,  $J = 2.0$  Hz), 16.3 (d,  $J = 2.1$  Hz), 14.0.

$^{31}\text{P}$  NMR (162 MHz,  $\text{CDCl}_3$ )  $\delta$  22.61.

HRMS (ESI-TOF)  $m/z$ :  $[\text{M}+\text{H}]^+$  calcd for  $\text{C}_{20}\text{H}_{34}\text{O}_5\text{P}^+$  385.2138; Found: 385.2145.

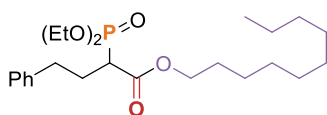

#### Decyl 2-(diethoxyphosphoryl)-4-phenylbutanoate (4b)

This reaction was conducted on a 0.2 mmol scale with the general procedure. The crude product was purified by silica gel chromatography (PE/EA = 2:1) to afford the title compound as a colorless liquid (85.4 mg, 97% yield). The identity of the product was confirmed by  $^1\text{H}$  NMR,  $^{13}\text{C}$  NMR,  $^{31}\text{P}$  NMR, and HRMS.

$^1\text{H}$  NMR (400 MHz,  $\text{CDCl}_3$ )  $\delta$  7.32 – 7.24 (m, 2H), 7.24 – 7.07 (m, 3H), 4.17 – 4.03 (m, 6H), 3.03 – 2.89 (m, 1H), 2.79 – 2.68 (m, 1H), 2.64 – 2.52 (m, 1H), 2.40 – 2.24 (m, 1H), 2.22 – 2.08 (m, 1H), 1.72 – 1.62 (m, 2H), 1.46 – 1.16 (m, 20H), 0.92 – 0.84 (t,  $J = 6.5$  Hz, 3H).

$^{13}\text{C}$  NMR (101 MHz,  $\text{CDCl}_3$ )  $\delta$  169.1 (d,  $J = 5.1$  Hz), 140.4, 128.5, 128.4, 126.2, 65.6, 62.7 (d,  $J = 6.4$  Hz), 62.6 (d,  $J = 6.7$  Hz), 45.1 (d,  $J = 130.9$  Hz), 34.3 (d,  $J = 15.3$  Hz), 31.8, 29.5, 29.3, 29.2, 28.62 (d,  $J = 4.5$  Hz), 28.56, 25.8, 22.6, 16.4 (d,  $J = 1.8$  Hz), 16.3 (d,  $J = 2.0$  Hz), 14.1.

$^{31}\text{P}$  NMR (162 MHz,  $\text{CDCl}_3$ )  $\delta$  22.61.

HRMS (ESI-TOF)  $m/z$ :  $[\text{M}+\text{H}]^+$  calcd for  $\text{C}_{24}\text{H}_{42}\text{O}_5\text{P}^+$  441.2764; Found: 441.2770.

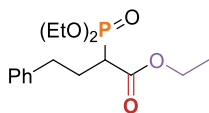

#### Ethyl 2-(diethoxyphosphoryl)-4-phenylbutanoate (4c)

This reaction was conducted on a 0.2 mmol scale with the general procedure. The crude product was purified by silica gel chromatography (PE/EA = 2:1) to afford the title compound as a colorless liquid (43.3 mg, 66% yield). The identity of the product was confirmed by  $^1\text{H}$  NMR,  $^{13}\text{C}$  NMR,  $^{31}\text{P}$  NMR and HRMS.

$^1\text{H}$  NMR (400 MHz,  $\text{CDCl}_3$ )  $\delta$  7.32 – 7.26 (m, 2H), 7.24 – 7.14 (m, 3H), 4.27 – 4.18 (m, 2H), 4.16 – 4.05 (m, 4H), 3.02 – 2.89 (m, 1H), 2.79 – 2.67 (m, 1H), 2.65 – 2.53 (m, 1H), 2.40 – 2.24 (m, 1H), 2.22 – 2.07 (m, 1H), 1.34 – 1.27 (m, 9H).

$^{13}\text{C}$  NMR (101 MHz,  $\text{CDCl}_3$ )  $\delta$  169.0 (d,  $J = 5.1$  Hz), 140.4, 128.5, 128.4, 126.2, 62.7 (d,  $J = 6.5$  Hz), 62.6 (d,  $J = 6.8$  Hz), 61.4, 45.0 (d,  $J = 130.9$  Hz), 34.3 (d,  $J = 15.3$  Hz), 28.6 (d,  $J = 4.7$  Hz), 16.34 (d,  $J = 2.1$  Hz), 16.28 (d,  $J = 2.3$  Hz), 14.1.

$^{31}\text{P}$  NMR (162 MHz,  $\text{CDCl}_3$ )  $\delta$  22.55.

HRMS (ESI-TOF)  $m/z$ :  $[\text{M}+\text{H}]^+$  calcd for  $\text{C}_{16}\text{H}_{26}\text{O}_5\text{P}^+$  329.1512; Found: 329.1512.

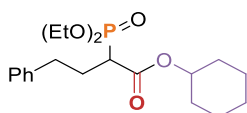

#### Cyclohexyl 2-(diethoxyphosphoryl)-4-phenylbutanoate (4d)

This reaction was conducted on a 0.2 mmol scale with the general procedure. The crude product was purified by silica gel chromatography (PE/EA = 2:1) to afford the title compound as a colorless liquid (47.4 mg, 62% yield). The identity of the product was confirmed by  $^1\text{H}$  NMR,  $^{13}\text{C}$  NMR,  $^{31}\text{P}$  NMR and HRMS.

$^1\text{H}$  NMR (400 MHz,  $\text{CDCl}_3$ )  $\delta$  7.28 (t,  $J = 7.2$  Hz, 2H), 7.25 – 7.14 (m, 3H), 5.00 – 4.80 (m, 1H), 4.26 – 4.02 (m, 4H), 3.04 – 2.86 (m, 1H), 2.83 – 2.68 (m, 1H), 2.64 – 2.52 (m, 1H), 2.41 – 2.23 (m, 1H), 2.23 – 2.06 (m, 1H), 1.99 – 1.84 (m, 2H), 1.80 – 1.72 (m, 2H), 1.65 – 1.23 (m, 12H).

$^{13}\text{C}$  NMR (101 MHz,  $\text{CDCl}_3$ )  $\delta$  168.4 (d,  $J = 5.1$  Hz), 140.5, 128.5, 128.4, 126.2, 73.7, 62.6 (d,  $J = 6.8$  Hz), 62.5 (d,  $J = 7.4$  Hz), 45.3 (d,  $J = 130.7$  Hz), 34.3 (d,  $J = 15.6$  Hz), 31.5, 31.4, 28.7 (d,  $J = 4.6$  Hz), 25.3, 23.60, 23.58, 16.36 (d,  $J = 2.2$  Hz), 16.30 (d,  $J = 2.3$  Hz)

$^{31}\text{P}$  NMR (162 MHz,  $\text{CDCl}_3$ )  $\delta$  22.61.

HRMS (ESI-TOF)  $m/z$ :  $[\text{M}+\text{H}]^+$  calcd for  $\text{C}_{20}\text{H}_{32}\text{O}_5\text{P}^+$  383.1982; Found: 383.1983.

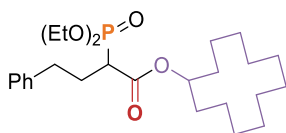

#### Cyclododecyl 2-(diethoxyphosphoryl)-4-phenylbutanoate (4e)

This reaction was conducted on a 0.2 mmol scale with the general procedure. The crude product was purified by silica gel chromatography (PE/EA = 2:1) to afford the title compound as a colorless liquid

(81.1 mg, 87% yield). The identity of the product was confirmed by  $^1\text{H}$  NMR,  $^{13}\text{C}$  NMR,  $^{31}\text{P}$  NMR and HRMS.

**$^1\text{H}$  NMR (400 MHz,  $\text{CDCl}_3$ )**  $\delta$  7.32 – 7.26 (m, 2H), 7.24 – 7.14 (m, 3H), 5.23 – 5.07 (m, 1H), 4.21 – 4.03 (m, 4H), 2.99 – 2.86 (m, 1H), 2.80 – 2.68 (m, 1H), 2.63 – 2.51 (m, 1H), 2.39 – 2.23 (m, 1H), 2.21 – 2.06 (m, 1H), 1.81 – 1.68 (m, 2H), 1.58 – 1.51 (m, 2H), 1.49 – 1.21 (m, 24H).

**$^{13}\text{C}$  NMR (101 MHz,  $\text{CDCl}_3$ )**  $\delta$  168.7 (d,  $J = 5.1$  Hz), 140.5, 128.5, 128.4, 126.2, 73.5, 62.6 (d,  $J = 6.1$  Hz), 62.5 (d,  $J = 6.4$  Hz), 45.2 (d,  $J = 130.8$  Hz), 34.3 (d,  $J = 15.8$  Hz), 29.2, 29.1, 28.7 (d,  $J = 4.4$  Hz), 23.9, 23.7, 23.44, 23.41, 23.26, 23.24, 21.03, 20.98, 16.4 (d,  $J = 2.6$  Hz), 16.3 (d,  $J = 2.7$  Hz).

**$^{31}\text{P}$  NMR (162 MHz,  $\text{CDCl}_3$ )**  $\delta$  22.87.

**HRMS (ESI-TOF) m/z:**  $[\text{M}+\text{H}]^+$  calcd for  $\text{C}_{26}\text{H}_{44}\text{O}_5\text{P}^+$  467.2921; Found: 467.2926.

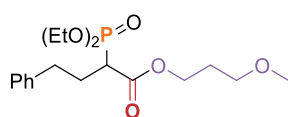

### 3-Methoxypropyl 2-(diethoxyphosphoryl)-4-phenylbutanoate (4f)

This reaction was conducted on a 0.2 mmol scale with the general procedure. The crude product was purified by silica gel chromatography (PE/EA = 1:1) to afford the title compound as a colorless liquid (36.5 mg, 49% yield). The identity of the product was confirmed by  $^1\text{H}$  NMR,  $^{13}\text{C}$  NMR,  $^{31}\text{P}$  NMR and HRMS.

**$^1\text{H}$  NMR (400 MHz,  $\text{CDCl}_3$ )**  $\delta$  7.39 – 7.24 (m, 2H), 7.24 – 7.14 (m, 3H), 4.29 – 4.20 (m, 2H), 4.17 – 3.97 (m, 4H), 3.47 (t,  $J = 6.4$  Hz, 2H), 3.34 (s, 3H), 3.03 – 2.89 (m, 1H), 2.79 – 2.66 (m, 1H), 2.65 – 2.53 (m, 1H), 2.40 – 2.24 (m, 1H), 2.23 – 2.07 (m, 1H), 1.99 – 1.86 (m, 2H), 1.36 – 1.23 (m, 6H).

**$^{13}\text{C}$  NMR (101 MHz,  $\text{CDCl}_3$ )**  $\delta$  169.0 (d,  $J = 4.9$  Hz), 140.4, 128.5, 128.4, 126.2, 68.9, 62.70 (d,  $J = 6.5$  Hz), 62.58 (d,  $J = 6.4$  Hz), 62.57, 58.7, 45.0 (d,  $J = 130.9$  Hz), 34.3 (d,  $J = 15.2$  Hz), 28.9, 28.6 (d,  $J = 4.5$  Hz), 16.4, 16.3 (d,  $J = 1.4$  Hz).

**$^{31}\text{P}$  NMR (162 MHz,  $\text{CDCl}_3$ )**  $\delta$  22.52.

**HRMS (ESI-TOF) m/z:**  $[\text{M}+\text{H}]^+$  calcd for  $\text{C}_{18}\text{H}_{30}\text{O}_6\text{P}^+$  373.1775; Found: 373.1777.

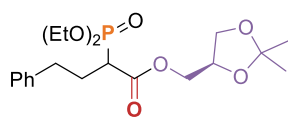

### ((R)-2,2-dimethyl-1,3-dioxolan-4-yl)methyl 2-(diethoxyphosphoryl)-4-phenylbutanoate (4g)

This reaction was conducted on a 0.2 mmol scale with the general procedure. The crude product was purified by silica gel chromatography (PE/EA = 2:3) to afford the title compound as a colorless liquid (35.6 mg, 43% yield). The identity of the product was confirmed by  $^1\text{H}$  NMR,  $^{13}\text{C}$  NMR,  $^{31}\text{P}$  NMR and HRMS.

**$^1\text{H}$  NMR (400 MHz,  $\text{CDCl}_3$ )**  $\delta$  7.36 – 7.25 (m, 2H), 7.25 – 7.13 (m, 3H), 4.38 – 4.28 (m, 1H), 4.27 – 4.00 (m, 7H), 3.83 – 3.73 (m, 1H), 3.07 – 2.93 (m, 1H), 2.79 – 2.66 (m, 1H), 2.66 – 2.54 (m, 1H), 2.40 – 2.24 (m, 1H), 2.24 – 2.08 (m, 1H), 1.44 (s, 3H), 1.37 (s, 3H), 1.35 – 1.26 (m, 6H).

**$^{13}\text{C}$  NMR (101 MHz,  $\text{CDCl}_3$ )**  $\delta$  168.9 (d,  $J = 5.1$  Hz), 140.3, 128.6, 128.5, 126.3, 109.8, 73.3, 66.4, 65.5, 65.4, 62.8 (d,  $J = 6.7$  Hz), 62.7 (d,  $J = 7.7$  Hz), 44.9 (d,  $J = 130.9$  Hz), 34.3 (d,  $J = 15.1$  Hz), 28.6 (d,  $J = 4.6$  Hz), 26.8, 25.3, 16.31, 16.27.

**<sup>31</sup>P NMR (162 MHz, CDCl<sub>3</sub>)** δ 22.11.

**HRMS (ESI-TOF) m/z:** [M+H]<sup>+</sup> calcd for C<sub>20</sub>H<sub>32</sub>O<sub>7</sub>P<sup>+</sup> 415.1880; Found: 415.1885.

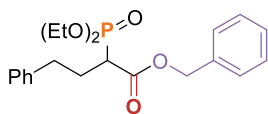

#### **Benzyl 2-(diethoxyphosphoryl)-4-phenylbutanoate (4h)**

This reaction was conducted on a 0.2 mmol scale with the general procedure. The crude product was purified by silica gel chromatography (PE/EA = 2:1) to afford the title compound as a colorless liquid (53.8 mg, 69% yield). The identity of the product was confirmed by <sup>1</sup>H NMR, <sup>13</sup>C NMR, <sup>31</sup>P NMR and HRMS.

**<sup>1</sup>H NMR (400 MHz, CDCl<sub>3</sub>)** δ 7.44 – 7.30 (m, 5H), 7.25 (t, *J* = 7.3 Hz, 2H), 7.18 (t, *J* = 7.3 Hz, 1H), 7.10 (d, *J* = 6.7 Hz, 2H), 5.20 (s, 2H), 4.62 – 3.87 (m, 4H), 3.07 – 2.91 (m, 1H), 2.75 – 2.63 (m, 1H), 2.61 – 2.49 (m, 1H), 2.41 – 2.25 (m, 1H), 2.24 – 2.08 (m, 1H), 1.38 – 1.21 (m, 6H).

**<sup>13</sup>C NMR (101 MHz, CDCl<sub>3</sub>)** δ 168.9 (d, *J* = 5.1 Hz), 140.3, 135.5, 128.53, 128.50, 128.4, 128.3, 126.2, 67.1, 62.72 (d, *J* = 6.4 Hz), 62.67 (d, *J* = 6.8 Hz), 45.0 (d, *J* = 130.9 Hz), 34.2 (d, *J* = 15.1 Hz), 28.6 (d, *J* = 4.6 Hz), 16.3 (d, *J* = 5.6 Hz), 16.2 (d, *J* = 5.7 Hz)

**<sup>31</sup>P NMR (162 MHz, CDCl<sub>3</sub>)** δ 22.26.

**HRMS (ESI-TOF) m/z:** [M+H]<sup>+</sup> calcd for C<sub>21</sub>H<sub>28</sub>O<sub>5</sub>P<sup>+</sup> 391.1669; Found: 391.1672.

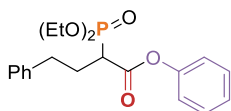

#### **Phenyl 2-(diethoxyphosphoryl)-4-phenylbutanoate (4j)**

This reaction was conducted on a 0.2 mmol scale with the general procedure. The crude product was purified by silica gel chromatography (PE/EA = 2:1) to afford the title compound as a colorless liquid (63.2 mg, 84% yield). The identity of the product was confirmed by <sup>1</sup>H NMR, <sup>13</sup>C NMR, <sup>31</sup>P NMR and HRMS.

**<sup>1</sup>H NMR (400 MHz, CDCl<sub>3</sub>)** δ 7.44 – 7.36 (m, 2H), 7.34 – 7.28 (m, 2H), 7.28 – 7.15 (m, 4H), 7.11 (d, *J* = 7.3 Hz, 2H), 4.28 – 4.09 (m, 4H), 3.46 – 3.10 (m, 1H), 2.92 – 2.80 (m, 1H), 2.78 – 2.66 (m, 1H), 2.52 – 2.36 (m, 1H), 2.34 – 2.19 (m, 1H), 1.38 – 1.29 (m, 6H).

**<sup>13</sup>C NMR (101 MHz, CDCl<sub>3</sub>)** δ 167.8 (d, *J* = 5.4 Hz), 150.6, 140.2, 129.5, 128.58, 128.56, 126.4, 126.1, 121.3, 63.0 (d, *J* = 6.4 Hz), 62.9 (d, *J* = 6.7 Hz), 45.1 (d, *J* = 129.9 Hz), 34.3 (d, *J* = 15.0 Hz), 28.6 (d, *J* = 4.5 Hz), 16.4 (d, *J* = 1.4 Hz), 16.4 (d, *J* = 1.7 Hz).

**<sup>31</sup>P NMR (162 MHz, CDCl<sub>3</sub>)** δ 21.77.

**HRMS (ESI-TOF) m/z:** [M+H]<sup>+</sup> calcd for C<sub>20</sub>H<sub>26</sub>O<sub>5</sub>P<sup>+</sup> 377.1512; Found: 377.1513.

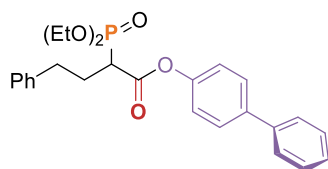

#### [1,1'-Biphenyl]-4-yl 2-(diethoxyphosphoryl)-4-phenylbutanoate (4k)

This reaction was conducted on a 0.2 mmol scale with the general procedure. The crude product was purified by silica gel chromatography (PE/EA = 2:1) to afford the title compound as a colorless liquid (56.0 mg, 62% yield). The identity of the product was confirmed by  $^1\text{H}$  NMR,  $^{13}\text{C}$  NMR,  $^{31}\text{P}$  NMR and HRMS.

$^1\text{H}$  NMR (400 MHz,  $\text{CDCl}_3$ )  $\delta$  7.63 – 7.49 (m, 4H), 7.44 (t,  $J = 7.6$  Hz, 2H), 7.39 – 7.29 (m, 3H), 7.27 – 7.16 (m, 5H), 4.27 – 4.10 (m, 4H), 3.37 – 3.11 (m, 1H), 2.99 – 2.82 (m, 1H), 2.79 – 2.67 (m, 1H), 2.59 – 2.38 (m, 1H), 2.38 – 2.19 (m, 1H), 1.41 – 1.21 (m, 6H).

$^{13}\text{C}$  NMR (101 MHz,  $\text{CDCl}_3$ )  $\delta$  167.9 (d,  $J = 5.5$  Hz), 150.0, 140.3, 140.2, 139.3, 128.8, 128.59, 128.57, 128.2, 127.4, 127.1, 126.4, 121.6, 63.1 (d,  $J = 6.4$  Hz), 62.9 (d,  $J = 6.8$  Hz), 45.2 (d,  $J = 130.0$  Hz), 34.4 (d,  $J = 15.0$  Hz), 28.6 (d,  $J = 4.5$  Hz), 16.42, 16.36.

$^{31}\text{P}$  NMR (162 MHz,  $\text{CDCl}_3$ )  $\delta$  21.73.

HRMS (ESI-TOF)  $m/z$ :  $[\text{M}+\text{H}]^+$  calcd for  $\text{C}_{26}\text{H}_{30}\text{O}_5\text{P}^+$  453.1825; Found: 453.1828.

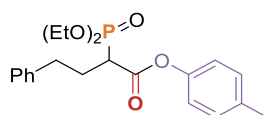

#### *p*-Tolyl 2-(diethoxyphosphoryl)-4-phenylbutanoate (4l)

This reaction was conducted on a 0.2 mmol scale with the general procedure. The crude product was purified by silica gel chromatography (PE/EA = 2:1) to afford the title compound as a colorless liquid (53.8 mg, 69% yield). The identity of the product was confirmed by  $^1\text{H}$  NMR,  $^{13}\text{C}$  NMR,  $^{31}\text{P}$  NMR and HRMS.

$^1\text{H}$  NMR (400 MHz,  $\text{CDCl}_3$ )  $\delta$  7.30 (t,  $J = 7.5$  Hz, 2H), 7.25 – 7.16 (m, 5H), 6.98 (d,  $J = 8.4$  Hz, 2H), 4.28 – 4.02 (m, 4H), 3.28 – 3.12 (m, 1H), 2.91 – 2.79 (m, 1H), 2.78 – 2.66 (m, 1H), 2.56 – 2.37 (m, 1H), 2.35 (s, 3H), 2.31 – 2.15 (m, 1H), 1.44 – 1.24 (m, 6H).

$^{13}\text{C}$  NMR (101 MHz,  $\text{CDCl}_3$ )  $\delta$  168.0 (d,  $J = 5.3$  Hz), 148.4, 140.2, 135.7, 129.9, 128.6, 128.5, 126.3, 121.0, 63.0 (d,  $J = 6.5$  Hz), 62.9 (d,  $J = 6.9$  Hz), 45.1 (d,  $J = 129.9$  Hz), 34.3 (d,  $J = 15.0$  Hz), 28.6 (d,  $J = 4.5$  Hz), 20.8, 16.4 (d,  $J = 1.7$  Hz), 16.3 (d,  $J = 1.9$  Hz).

$^{31}\text{P}$  NMR (162 MHz,  $\text{CDCl}_3$ )  $\delta$  21.83.

HRMS (ESI-TOF)  $m/z$ :  $[\text{M}+\text{H}]^+$  calcd for  $\text{C}_{21}\text{H}_{28}\text{O}_5\text{P}^+$  391.1669; Found: 391.1675.

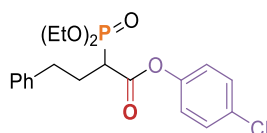

#### 4-Chlorophenyl 2-(diethoxyphosphoryl)-4-phenylbutanoate (4m)

This reaction was conducted on a 0.2 mmol scale with the general procedure. The crude product was purified by silica gel chromatography (PE/EA = 2:1) to afford the title compound as a colorless liquid

(49.2 mg, 60% yield). The identity of the product was confirmed by  $^1\text{H}$  NMR,  $^{13}\text{C}$  NMR,  $^{31}\text{P}$  NMR and HRMS.

$^1\text{H}$  NMR (400 MHz,  $\text{CDCl}_3$ )  $\delta$  7.40 – 7.28 (m, 4H), 7.26 – 7.19 (m, 3H), 7.04 (d,  $J = 8.9$  Hz, 2H), 4.27 – 4.09 (m, 4H), 3.25 – 3.12 (m, 1H), 2.97 – 2.78 (m, 1H), 2.76 – 2.65 (m, 1H), 2.54 – 2.35 (m, 1H), 2.32 – 2.14 (m, 1H), 1.48 – 1.18 (m, 6H).

$^{13}\text{C}$  NMR (101 MHz,  $\text{CDCl}_3$ )  $\delta$  167.7 (d,  $J = 5.5$  Hz), 149.1, 140.1, 131.5, 129.5, 128.6, 126.4, 122.7, 63.1 (d,  $J = 6.4$  Hz), 62.9 (d,  $J = 6.9$  Hz), 45.1 (d,  $J = 129.8$  Hz), 34.3 (d,  $J = 14.8$  Hz), 28.5 (d,  $J = 4.7$  Hz), 16.4, 16.3.

$^{31}\text{P}$  NMR (162 MHz,  $\text{CDCl}_3$ )  $\delta$  21.53.

HRMS (ESI-TOF)  $m/z$ :  $[\text{M}+\text{H}]^+$  calcd for  $\text{C}_{20}\text{H}_{25}\text{ClO}_5\text{P}^+$  411.1123; Found: 411.1128.

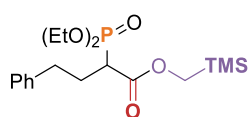

#### (Trimethylsilyl)methyl 2-(diethoxyphosphoryl)-4-phenylbutanoate (4n)

This reaction was conducted on a 0.2 mmol scale with the general procedure. The crude product was purified by silica gel chromatography (PE/EA = 5:2) to afford the title compound as a colorless liquid (47.9 mg, 62% yield). The identity of the product was confirmed by  $^1\text{H}$  NMR,  $^{13}\text{C}$  NMR,  $^{31}\text{P}$  NMR, and HRMS.

$^1\text{H}$  NMR (400 MHz,  $\text{CDCl}_3$ )  $\delta$  7.22 – 7.12 (m, 2H), 7.12 – 7.01 (m, 3H), 4.12 – 3.91 (m, 4H), 3.75 (d,  $J = 3.2$  Hz, 2H), 2.92 – 2.78 (m, 1H), 2.67 – 2.55 (m, 1H), 2.51 – 2.39 (m, 1H), 2.28 – 2.13 (m, 1H), 2.10 – 1.95 (m, 1H), 1.33 – 0.99 (m, 6H), 0.00 (s, 9H).

$^{13}\text{C}$  NMR (101 MHz,  $\text{CDCl}_3$ )  $\delta$  169.7 (d,  $J = 5.1$  Hz), 140.4, 128.5, 128.4, 126.2, 62.6 (d,  $J = 4.0$  Hz), 62.5 (d,  $J = 4.3$  Hz), 59.0, 45.0 (d,  $J = 131.3$  Hz), 34.3 (d,  $J = 15.5$  Hz), 28.7 (d,  $J = 4.4$  Hz), 16.4, 16.3, -3.1.

$^{31}\text{P}$  NMR (162 MHz,  $\text{CDCl}_3$ )  $\delta$  22.90.

HRMS (ESI-TOF)  $m/z$ :  $[\text{M}+\text{H}]^+$  calcd for  $\text{C}_{18}\text{H}_{32}\text{O}_5\text{PSi}^+$  387.1751; Found: 387.1756.

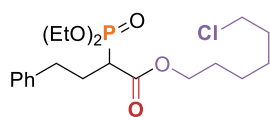

#### 6-Chlorohexyl 2-(diethoxyphosphoryl)-4-phenylbutanoate (4o)

This reaction was conducted on a 0.2 mmol scale with the general procedure. The crude product was purified by silica gel chromatography (PE/EA = 2:1) to afford the title compound as a colorless liquid (63.6 mg, 76% yield). The identity of the product was confirmed by  $^1\text{H}$  NMR,  $^{13}\text{C}$  NMR,  $^{31}\text{P}$  NMR, and HRMS.

$^1\text{H}$  NMR (400 MHz,  $\text{CDCl}_3$ )  $\delta$  7.32 – 7.26 (m, 2H), 7.24 – 7.13 (m, 3H), 4.24 – 4.02 (m, 6H), 3.53 (t,  $J = 6.6$  Hz, 2H), 3.03 – 2.89 (m, 1H), 2.79 – 2.67 (m, 1H), 2.65 – 2.53 (m, 1H), 2.40 – 2.23 (m, 1H), 2.23 – 2.07 (m, 1H), 1.83 – 1.63 (m, 4H), 1.55 – 1.37 (m, 4H), 1.40 – 1.23 (m, 6H).

$^{13}\text{C}$  NMR (101 MHz,  $\text{CDCl}_3$ )  $\delta$  169.1 (d,  $J = 4.9$  Hz), 140.4, 128.5, 128.4, 126.2, 65.3, 62.7 (d,  $J = 6.5$  Hz), 62.6 (d,  $J = 6.8$  Hz), 45.0 (d,  $J = 131.0$  Hz), 44.9, 34.3 (d,  $J = 15.1$  Hz), 32.4, 28.6 (d,  $J = 4.7$  Hz), 28.4, 26.4, 25.2, 16.4, 16.3.

**<sup>31</sup>P NMR (162 MHz, CDCl<sub>3</sub>)** δ 22.55.

**HRMS (ESI-TOF) m/z:** [M+H]<sup>+</sup> calcd for C<sub>20</sub>H<sub>33</sub>ClO<sub>5</sub>P<sup>+</sup> 419.1749; Found: 419.1750.

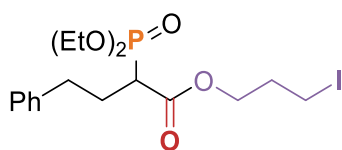

### 3-Iodopropyl 2-(diethoxyphosphoryl)-4-phenylbutanoate (4p)

This reaction was conducted on a 0.2 mmol scale with the general procedure. The crude product was purified by silica gel chromatography (PE/EA = 2:1) to afford the title compound as a colorless liquid (45.9 mg, 49% yield). The identity of the product was confirmed by <sup>1</sup>H NMR, <sup>13</sup>C NMR, <sup>31</sup>P NMR and HRMS.

**<sup>1</sup>H NMR (400 MHz, CDCl<sub>3</sub>)** δ 7.41 – 7.25 (m, 2H), 7.25 – 7.12 (m, 3H), 4.52 – 4.17 (m, 2H), 4.17 – 3.94 (m, 4H), 3.27 (t, *J* = 6.8 Hz, 2H), 3.11 – 2.83 (m, 1H), 2.78 – 2.64 (m, 1H), 2.65 – 2.53 (m, 1H), 2.48 – 2.24 (m, 1H), 2.22 – 2.09 (m, 3H), 1.39 – 1.10 (m, 6H).

**<sup>13</sup>C NMR (101 MHz, CDCl<sub>3</sub>)** δ 168.9 (d, *J* = 5.1 Hz), 140.2, 128.53, 128.48, 126.3, 64.8, 62.8 (d, *J* = 6.5 Hz), 62.7 (d, *J* = 6.8 Hz), 44.9 (d, *J* = 130.9 Hz), 34.3 (d, *J* = 15.1 Hz), 32.2, 28.4 (d, *J* = 4.6 Hz), 16.41, 16.35, 1.5.

**<sup>31</sup>P NMR (162 MHz, CDCl<sub>3</sub>)** δ 22.37.

**HRMS (ESI-TOF) m/z:** [M+H]<sup>+</sup> calcd for C<sub>17</sub>H<sub>27</sub>IO<sub>5</sub>P<sup>+</sup> 469.0635; Found: 469.0642.

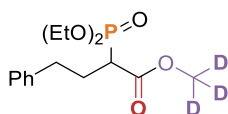

### Methyl-d<sub>3</sub> 2-(diethoxyphosphoryl)-4-phenylbutanoate (4q)

This reaction was conducted on a 0.2 mmol scale with the general procedure. The crude product was purified by silica gel chromatography (PE/EA = 2:1) to afford the title compound as a colorless liquid (43.7 mg, 69% yield). The identity of the product was confirmed by <sup>1</sup>H NMR, <sup>13</sup>C NMR, <sup>31</sup>P NMR and HRMS.

**<sup>1</sup>H NMR (400 MHz, CDCl<sub>3</sub>)** δ 7.32 – 7.24 (m, 2H), 7.24 – 7.14 (m, 3H), 4.22 – 4.02 (m, 4H), 3.05 – 2.91 (m, 1H), 2.78 – 2.67 (m, 1H), 2.64 – 2.52 (m, 1H), 2.41 – 2.24 (m, 1H), 2.23 – 2.07 (m, 1H), 1.35 – 1.22 (m, 6H).

**<sup>13</sup>C NMR (101 MHz, CDCl<sub>3</sub>)** δ 169.5 (d, *J* = 5.0 Hz), 140.3, 128.5, 128.4, 126.2, 62.8 (d, *J* = 6.4 Hz), 62.7 (d, *J* = 6.7 Hz), 44.9 (d, *J* = 131.0 Hz), 34.3 (d, *J* = 15.0 Hz), 28.6 (d, *J* = 4.6 Hz), 16.3 (d, *J* = 2.0 Hz), 16.3 (d, *J* = 2.2 Hz).

**<sup>31</sup>P NMR (162 MHz, CDCl<sub>3</sub>)** δ 22.51.

**HRMS (ESI-TOF) m/z:** [M+H]<sup>+</sup> calcd for C<sub>15</sub>H<sub>21</sub>D<sub>3</sub>O<sub>5</sub>P<sup>+</sup> 318.1544; Found: 318.1545.



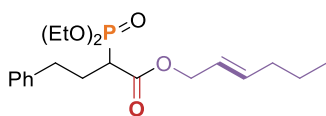

#### (*E*)-Hex-2-en-1-yl 2-(diethoxyphosphoryl)-4-phenylbutanoate (4r)

This reaction was conducted on a 0.2 mmol scale with the general procedure. The crude product was purified by silica gel chromatography (PE/EA = 2:1) to afford the title compound as a colorless liquid (53.5 mg, 70% yield). The identity of the product was confirmed by  $^1\text{H}$  NMR,  $^{13}\text{C}$  NMR,  $^{31}\text{P}$  NMR and HRMS.

$^1\text{H}$  NMR (400 MHz,  $\text{CDCl}_3$ )  $\delta$  7.34 – 7.24 (m, 2H), 7.23 – 7.13 (m, 3H), 5.87 – 5.76 (m, 1H), 5.64 – 5.53 (m, 1H), 4.60 (d,  $J$  = 6.5 Hz, 2H), 4.18 – 4.02 (m, 4H), 3.04 – 2.90 (m, 1H), 2.81 – 2.67 (m, 1H), 2.64 – 2.52 (m, 1H), 2.40 – 2.24 (m, 1H), 2.22 – 2.09 (m, 1H), 2.09 – 1.98 (m, 2H), 1.51 – 1.37 (m, 2H), 1.36 – 1.23 (m, 6H), 0.90 (t,  $J$  = 7.4 Hz, 3H).

$^{13}\text{C}$  NMR (101 MHz,  $\text{CDCl}_3$ )  $\delta$  168.8 (d,  $J$  = 5.0 Hz), 140.5, 136.9, 128.6, 128.4, 126.2, 123.5, 66.1, 62.72 (d,  $J$  = 5.7 Hz), 62.66 (d,  $J$  = 6.5 Hz), 45.0 (d,  $J$  = 130.9 Hz), 34.3, 34.3 (d,  $J$  = 15.2 Hz), 28.7 (d,  $J$  = 4.7 Hz), 22.0, 16.3 (d,  $J$  = 3.1 Hz), 16.3 (d,  $J$  = 3.4 Hz), 13.6.

$^{31}\text{P}$  NMR (162 MHz,  $\text{CDCl}_3$ )  $\delta$  22.43.

HRMS (ESI-TOF)  $m/z$ :  $[\text{M}+\text{H}]^+$  calcd for  $\text{C}_{20}\text{H}_{32}\text{O}_5\text{P}^+$  383.1982; Found: 383.1985.

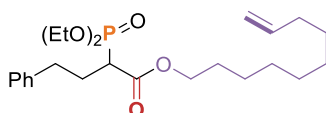

#### Dec-9-en-1-yl 2-(diethoxyphosphoryl)-4-phenylbutanoate (4s)

This reaction was conducted on a 0.2 mmol scale with the general procedure. The crude product was purified by silica gel chromatography (PE/EA = 2:1) to afford the title compound as a colorless liquid (71.0 mg, 81% yield). The identity of the product was confirmed by  $^1\text{H}$  NMR,  $^{13}\text{C}$  NMR,  $^{31}\text{P}$  NMR and HRMS.

$^1\text{H}$  NMR (400 MHz,  $\text{CDCl}_3$ )  $\delta$  7.32 – 7.25 (m, 2H), 7.24 – 7.15 (m, 3H), 5.88 – 5.73 (m, 1H), 5.03 – 4.96 (m, 1H), 4.96 – 4.89 (m, 1H), 4.23 – 4.01 (m, 6H), 3.04 – 2.89 (m, 1H), 2.81 – 2.67 (m, 1H), 2.64 – 2.52 (m, 1H), 2.40 – 2.23 (m, 1H), 2.22 – 2.10 (m, 1H), 2.12 – 1.99 (m, 2H), 1.73 – 1.62 (m, 2H), 1.42 – 1.22 (m, 16H).

$^{13}\text{C}$  NMR (101 MHz,  $\text{CDCl}_3$ )  $\delta$  169.1 (d,  $J$  = 5.0 Hz), 140.4, 139.1, 128.5, 128.4, 126.2, 114.2, 65.6, 62.7 (d,  $J$  = 6.6 Hz), 62.6 (d,  $J$  = 6.9 Hz), 45.1 (d,  $J$  = 131.0 Hz), 34.3 (d,  $J$  = 15.3 Hz), 33.7, 29.3, 29.2, 29.0, 28.9, 28.6 (d,  $J$  = 4.5 Hz), 28.6, 25.8, 16.4 (d,  $J$  = 1.7 Hz), 16.3 (d,  $J$  = 1.8 Hz).

$^{31}\text{P}$  NMR (162 MHz,  $\text{CDCl}_3$ )  $\delta$  22.61.

HRMS (ESI-TOF)  $m/z$ :  $[\text{M}+\text{H}]^+$  calcd for  $\text{C}_{24}\text{H}_{40}\text{O}_5\text{P}^+$  439.2608; Found: 439.2612.



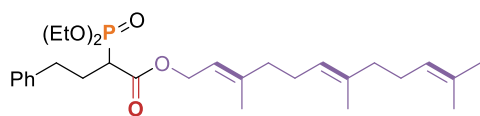

**(2E,6E)-3,7,11-Trimethyldodeca-2,6,10-trien-1-yl 2-(diethoxyphosphoryl)-4-phenylbutanoate (4t)**

This reaction was conducted on a 0.2 mmol scale with the general procedure. The crude product was purified by silica gel chromatography (PE/EA = 2:1) to afford the title compound as a colorless liquid (58.5 mg, 58% yield). The identity of the product was confirmed by  $^1\text{H}$  NMR,  $^{13}\text{C}$  NMR,  $^{31}\text{P}$  NMR and HRMS.

$^1\text{H}$  NMR (400 MHz,  $\text{CDCl}_3$ )  $\delta$  7.32 – 7.23 (m, 2H), 7.23 – 7.13 (m, 3H), 5.39 (t,  $J = 6.5$  Hz, 1H), 5.27 – 5.00 (m, 2H), 4.68 (d,  $J = 6.3$  Hz, 2H), 4.42 – 3.83 (m, 4H), 3.03 – 2.89 (m, 1H), 2.79 – 2.67 (m, 1H), 2.64 – 2.52 (m, 1H), 2.40 – 2.23 (m, 1H), 2.22 – 2.01 (m, 7H), 2.01 – 1.87 (m, 2H), 1.73 (s, 3H), 1.71 – 1.54 (m, 9H), 1.42 – 1.15 (m, 6H).

$^{13}\text{C}$  NMR (101 MHz,  $\text{CDCl}_3$ )  $\delta$  169.0 (d,  $J = 4.9$  Hz), 142.8, 140.5, 135.5, 131.3, 128.6, 128.4, 126.2, 124.3, 123.5, 117.9, 62.7 (d,  $J = 5.2$  Hz), 62.64 (d,  $J = 5.9$  Hz), 62.3, 45.0 (d,  $J = 130.9$  Hz), 39.7, 39.5, 34.3 (d,  $J = 15.3$  Hz), 28.7 (d,  $J = 4.5$  Hz), 26.7, 26.3, 25.7, 17.7, 16.5, 16.4 (d,  $J = 3.4$  Hz), 16.3 (d,  $J = 3.6$  Hz), 16.0.

$^{31}\text{P}$  NMR (162 MHz,  $\text{CDCl}_3$ )  $\delta$  22.52.

HRMS (ESI-TOF)  $m/z$ :  $[\text{M}+\text{H}]^+$  calcd for  $\text{C}_{29}\text{H}_{46}\text{O}_5\text{P}^+$  505.3077; Found: 505.3079.

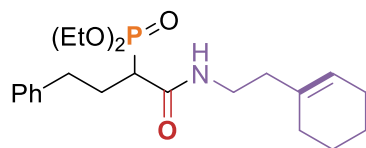

**Diethyl (1-((2-(cyclohex-1-en-1-yl)ethyl)amino)-1-oxo-4-phenylbutan-2-yl)phosphonate (4u)**

This reaction was conducted on a 0.2 mmol scale with the general procedure. The crude product was purified by silica gel chromatography (PE/EA = 2:3) to afford the title compound as a brown liquid (47.2 mg, 58% yield). The identity of the product was confirmed by  $^1\text{H}$  NMR,  $^{13}\text{C}$  NMR,  $^{31}\text{P}$  NMR and HRMS.

$^1\text{H}$  NMR (400 MHz,  $\text{CDCl}_3$ )  $\delta$  7.32 – 7.24 (m, 2H), 7.24 – 7.14 (m, 3H), 6.31 (s, 1H), 5.49 (s, 1H), 4.22 – 3.97 (m, 5H), 3.65 – 3.30 (m, 2H), 2.94 – 2.75 (m, 1H), 2.75 – 2.54 (m, 2H), 2.33 – 2.21 (m, 1H), 2.16 (t,  $J = 7.0$  Hz, 2H), 2.03 – 1.90 (m, 4H), 1.68 – 1.58 (m, 2H), 1.58 – 1.49 (m, 2H), 1.40 – 1.20 (m, 6H).

$^{13}\text{C}$  NMR (101 MHz,  $\text{CDCl}_3$ )  $\delta$  167.0 (d,  $J = 2.4$  Hz), 140.8, 134.5, 128.6, 128.4, 126.1, 123.5, 62.7 (d,  $J = 6.8$  Hz), 62.5 (d,  $J = 6.6$  Hz), 61.4 (d,  $J = 6.5$  Hz), 45.2 (d,  $J = 129.7$  Hz), 37.8, 37.6, 34.0 (d,  $J = 14.7$  Hz), 28.7 (d,  $J = 4.3$  Hz), 27.9, 25.2, 22.8, 22.3, 16.4 (d,  $J = 2.1$  Hz), 16.3 (d,  $J = 2.5$  Hz).

$^{31}\text{P}$  NMR (162 MHz,  $\text{CDCl}_3$ )  $\delta$  25.60.

HRMS (ESI-TOF)  $m/z$ :  $[\text{M}+\text{H}]^+$  calcd for  $\text{C}_{22}\text{H}_{35}\text{NO}_4\text{P}^+$  408.2298; Found: 408.2302.

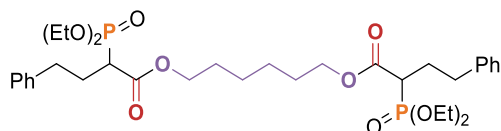

#### Hexane-1,6-diyl bis(2-(diethoxyphosphoryl)-4-phenylbutanoate) (4v)

This reaction was conducted on a 0.2 mmol scale with the general procedure. The crude product was purified by silica gel chromatography (PE/EA = 1:1) to afford the title compound as a brown liquid (85.9 mg, 63% yield). The identity of the product was confirmed by  $^1\text{H}$  NMR,  $^{13}\text{C}$  NMR,  $^{31}\text{P}$  NMR and HRMS.

$^1\text{H}$  NMR (400 MHz,  $\text{CDCl}_3$ )  $\delta$  7.33 – 7.24 (m, 4H), 7.24 – 7.14 (m, 6H), 4.18 – 4.05 (m, 12H), 3.07 – 2.90 (m, 2H), 2.79 – 2.65 (m, 2H), 2.64 – 2.49 (m, 2H), 2.43 – 2.25 (m, 2H), 2.22 – 2.07 (m, 2H), 1.72 – 1.64 (m, 4H), 1.47 – 1.36 (m, 4H), 1.35 – 1.23 (m, 12H).

$^{13}\text{C}$  NMR (101 MHz,  $\text{CDCl}_3$ )  $\delta$  169.0 (d,  $J = 4.9$  Hz), 140.3, 128.44, 128.38, 126.2, 65.2, 62.64 (d,  $J = 6.3$  Hz), 62.55 (d,  $J = 6.7$  Hz), 45.0 (d,  $J = 131.0$  Hz), 34.2 (d,  $J = 15.2$  Hz), 28.5 (d,  $J = 4.4$  Hz), 28.4, 25.5, 16.3, 16.2.

$^{31}\text{P}$  NMR (162 MHz,  $\text{CDCl}_3$ )  $\delta$  22.65.

HRMS (ESI-TOF)  $m/z$ :  $[\text{M}+\text{H}]^+$  calcd for  $\text{C}_{34}\text{H}_{53}\text{O}_{10}\text{P}_2^+$  683.3108; Found: 683.3110.

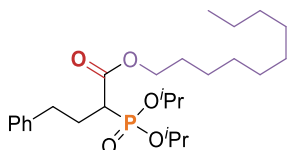

#### Decyl 2-(diisopropoxyphosphoryl)-4-phenylbutanoate (5a)

This reaction was conducted on a 0.2 mmol scale with the general procedure. The crude product was purified by silica gel chromatography (PE/EA = 2:1) to afford the title compound as a colorless liquid (83.3 mg, 89% yield). The identity of the product was confirmed by  $^1\text{H}$  NMR,  $^{13}\text{C}$  NMR,  $^{31}\text{P}$  NMR, and HRMS.

$^1\text{H}$  NMR (400 MHz,  $\text{CDCl}_3$ )  $\delta$  7.28 (t,  $J = 7.3$  Hz, 2H), 7.23 – 7.13 (m, 3H), 4.77 – 4.62 (m, 2H), 4.21 – 4.07 (m, 2H), 2.96 – 2.82 (m, 1H), 2.78 – 2.67 (m, 1H), 2.63 – 2.51 (m, 1H), 2.38 – 2.22 (m, 1H), 2.20 – 2.06 (m, 1H), 1.72 – 1.62 (m, 2H), 1.42 – 1.23 (m, 26H), 0.87 (t,  $J = 6.8$  Hz, 3H).

$^{13}\text{C}$  NMR (101 MHz,  $\text{CDCl}_3$ )  $\delta$  169.2 (d,  $J = 5.1$  Hz), 140.5, 128.5, 128.4, 126.1, 71.3 (d,  $J = 6.8$  Hz), 71.1 (d,  $J = 7.0$  Hz), 65.4, 45.8 (d,  $J = 132.3$  Hz), 34.3 (d,  $J = 15.5$  Hz), 31.8, 29.5, 29.2 (d,  $J = 4.8$  Hz), 28.8 (d,  $J = 4.7$  Hz), 28.6, 25.8, 24.1 (d,  $J = 3.5$  Hz), 24.0 (d,  $J = 3.7$  Hz), 23.73 (d,  $J = 5.2$  Hz), 23.70 (d,  $J = 5.3$  Hz), 22.6, 14.0.

$^{31}\text{P}$  NMR (162 MHz,  $\text{CDCl}_3$ )  $\delta$  22.60.

HRMS (ESI-TOF)  $m/z$ :  $[\text{M}+\text{H}]^+$  calcd for  $\text{C}_{26}\text{H}_{46}\text{O}_5\text{P}^+$  469.3077; Found: 469.3083.

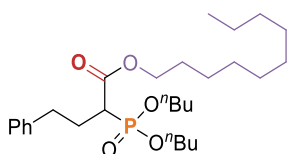

### Decyl 2-(dibutoxyphosphoryl)-4-phenylbutanoate (5b)

This reaction was conducted on a 0.2 mmol scale with the general procedure. The crude product was purified by silica gel chromatography (PE/EA = 2:1) to afford the title compound as a colorless liquid (81.7 mg, 82% yield). The identity of the product was confirmed by  $^1\text{H}$  NMR,  $^{13}\text{C}$  NMR,  $^{31}\text{P}$  NMR, and HRMS.

$^1\text{H}$  NMR (400 MHz,  $\text{CDCl}_3$ )  $\delta$  7.28 (t,  $J = 7.5$  Hz, 2H), 7.24 – 7.13 (m, 3H), 4.24 – 4.11 (m, 2H), 4.11 – 3.94 (m, 4H), 3.03 – 2.87 (m, 1H), 2.79 – 2.68 (m, 1H), 2.64 – 2.52 (m, 1H), 2.40 – 2.24 (m, 1H), 2.22 – 2.08 (m, 1H), 1.71 – 1.57 (m, 6H), 1.42 – 1.21 (m, 18H), 0.97 – 0.84 (m, 9H).

$^{13}\text{C}$  NMR (101 MHz,  $\text{CDCl}_3$ )  $\delta$  169.1 (d,  $J = 5.1$  Hz), 140.4, 128.5, 128.4, 126.2, 66.34 (d,  $J = 6.9$  Hz), 66.27 (d,  $J = 7.3$  Hz), 65.6, 45.0 (d,  $J = 131.0$  Hz), 34.3 (d,  $J = 15.4$  Hz), 32.5 (d,  $J = 6.2$  Hz), 31.9, 29.5, 29.3 (d,  $J = 3.4$  Hz), 25.9, 22.6, 18.6 (d,  $J = 2.3$  Hz), 14.1, 13.6 (d,  $J = 1.4$  Hz).

$^{31}\text{P}$  NMR (162 MHz,  $\text{CDCl}_3$ )  $\delta$  22.51.

HRMS (ESI-TOF)  $m/z$ :  $[\text{M}+\text{H}]^+$  calcd for  $\text{C}_{28}\text{H}_{50}\text{O}_5\text{P}^+$  497.3390; Found: 497.3394.

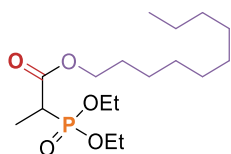

### Decyl 2-(diethoxyphosphoryl)propanoate (5c)

This reaction was conducted on a 0.2 mmol scale with the general procedure. The crude product was purified by silica gel chromatography (PE/EA = 1:1) to afford the title compound as a colorless liquid (58.8 mg, 84% yield). The identity of the product was confirmed by  $^1\text{H}$  NMR,  $^{13}\text{C}$  NMR,  $^{31}\text{P}$  NMR and HRMS.

$^1\text{H}$  NMR (400 MHz,  $\text{CDCl}_3$ )  $\delta$  4.29 – 3.86 (m, 6H), 3.14 – 2.83 (m, 1H), 1.80 – 1.51 (m, 2H), 1.50 – 1.37 (m, 3H), 1.36 – 1.10 (m, 20H), 0.92 – 0.68 (t,  $J = 6.8$  Hz, 3H).

$^{13}\text{C}$  NMR (101 MHz,  $\text{CDCl}_3$ )  $\delta$  169.78 (d,  $J = 4.5$  Hz), 65.5, 62.5 (d,  $J = 6.6$  Hz), 39.3 (d,  $J = 133.5$  Hz), 31.8, 29.43, 29.42, 29.2 (d,  $J = 6.6$  Hz), 28.5, 25.7, 22.6, 16.3 (d,  $J = 3.1$  Hz), 16.3 (d,  $J = 3.4$  Hz), 14.0, 11.7, 11.6.

$^{31}\text{P}$  NMR (162 MHz,  $\text{CDCl}_3$ )  $\delta$  23.89.

HRMS (ESI-TOF)  $m/z$ :  $[\text{M}+\text{H}]^+$  calcd for  $\text{C}_{17}\text{H}_{36}\text{O}_5\text{P}^+$  351.2295; Found: 351.2299.

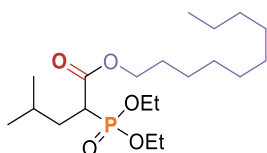

### Decyl 2-(diethoxyphosphoryl)-4-methylpentanoate (5d)

This reaction was conducted on a 0.2 mmol scale with the general procedure. The crude product was purified by silica gel chromatography (PE/EA = 2:1) to afford the title compound as a colorless liquid

(69.0 mg, 88% yield). The identity of the product was confirmed by  $^1\text{H}$  NMR,  $^{13}\text{C}$  NMR,  $^{31}\text{P}$  NMR and HRMS.

$^1\text{H}$  NMR (400 MHz,  $\text{CDCl}_3$ )  $\delta$  4.37 – 3.94 (m, 6H), 3.12 – 2.88 (m, 1H), 2.13 – 1.83 (m, 1H), 1.72 – 1.50 (m, 4H), 1.43 – 1.07 (m, 20H), 1.03 – 0.73 (m, 9H).

$^{13}\text{C}$  NMR (101 MHz,  $\text{CDCl}_3$ )  $\delta$  169.5 (d,  $J = 5.1$  Hz), 65.4, 62.6 (d,  $J = 5.8$  Hz), 62.5 (d,  $J = 6.3$  Hz), 44.0 (d,  $J = 131.2$  Hz), 35.5 (d,  $J = 5.1$  Hz), 31.8, 29.5, 29.2, 29.1, 28.5, 26.9 (d,  $J = 14.8$  Hz), 25.8, 22.9, 22.6, 21.1, 16.33 (d,  $J = 2.3$  Hz), 16.28 (d,  $J = 2.6$  Hz), 14.0.

$^{31}\text{P}$  NMR (162 MHz,  $\text{CDCl}_3$ )  $\delta$  23.49.

HRMS (ESI-TOF)  $m/z$ :  $[\text{M}+\text{H}]^+$  calcd for  $\text{C}_{20}\text{H}_{42}\text{O}_5\text{P}^+$  393.2764; Found: 393.2772.

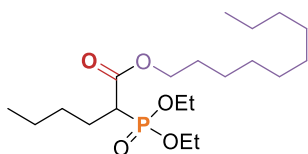

### Decyl 2-(diethoxyphosphoryl)hexanoate (5e)

This reaction was conducted on a 0.2 mmol scale with the general procedure. The crude product was purified by silica gel chromatography (PE/EA = 2:1) to afford the title compound as a colorless liquid (72.9 mg, 93% yield). The identity of the product was confirmed by  $^1\text{H}$  NMR,  $^{13}\text{C}$  NMR,  $^{31}\text{P}$  NMR and HRMS.

$^1\text{H}$  NMR (400 MHz,  $\text{CDCl}_3$ )  $\delta$  4.28 – 3.86 (m, 6H), 3.09 – 2.71 (m, 1H), 2.05 – 1.88 (m, 1H), 1.87 – 1.74 (m, 1H), 1.73 – 1.54 (m, 2H), 1.43 – 1.11 (m, 24H), 1.04 – 0.67 (m, 6H).

$^{13}\text{C}$  NMR (101 MHz,  $\text{CDCl}_3$ )  $\delta$  169.4 (d,  $J = 4.8$  Hz), 65.4, 62.6 (d,  $J = 4.8$  Hz), 62.5 (d,  $J = 5.2$  Hz), 45.8 (d,  $J = 131.2$  Hz), 31.8, 30.5 (d,  $J = 14.9$  Hz), 29.5, 29.2, 29.1, 28.5, 26.6 (d,  $J = 4.9$  Hz), 25.8, 22.6, 22.2, 16.3 (d,  $J = 2.9$  Hz), 16.3 (d,  $J = 2.9$  Hz), 14.0, 13.7.

$^{31}\text{P}$  NMR (162 MHz,  $\text{CDCl}_3$ )  $\delta$  23.11.

HRMS (ESI-TOF)  $m/z$ :  $[\text{M}+\text{H}]^+$  calcd for  $\text{C}_{20}\text{H}_{42}\text{O}_5\text{P}^+$  393.2764; Found: 393.2770.

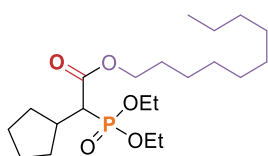

### Decyl 2-cyclopentyl-2-(diethoxyphosphoryl)acetate (5f)

This reaction was conducted on a 0.2 mmol scale with the general procedure. The crude product was purified by silica gel chromatography (PE/EA = 2:1) to afford the title compound as a colorless liquid (51.7 mg, 64% yield). The identity of the product was confirmed by  $^1\text{H}$  NMR,  $^{13}\text{C}$  NMR,  $^{31}\text{P}$  NMR and HRMS.

$^1\text{H}$  NMR (400 MHz,  $\text{CDCl}_3$ )  $\delta$  4.38 – 3.90 (m, 6H), 2.90 – 2.65 (m, 1H), 2.46 – 2.33 (m, 1H), 2.01 – 1.89 (m, 1H), 1.84 – 1.72 (m, 1H), 1.72 – 1.47 (m, 6H), 1.46 – 1.10 (m, 22H), 0.85 (t,  $J = 6.7$  Hz, 3H).

$^{13}\text{C}$  NMR (101 MHz,  $\text{CDCl}_3$ )  $\delta$  169.5 (d,  $J = 4.1$  Hz), 65.3, 62.33 (d,  $J = 6.6$  Hz), 62.32 (d,  $J = 7.6$  Hz), 51.4 (d,  $J = 132.5$  Hz), 38.9 (d,  $J = 5.0$  Hz), 31.9 (d,  $J = 15.8$  Hz), 31.4 (d,  $J = 2.4$  Hz), 29.5, 29.2, 29.1, 28.5, 25.8, 24.9, 24.2, 22.6, 16.4, 16.3, 14.0.

$^{31}\text{P}$  NMR (162 MHz,  $\text{CDCl}_3$ )  $\delta$  22.45.

**HRMS (ESI-TOF) m/z:**  $[M+H]^+$  calcd for  $C_{21}H_{42}O_5P^+$  405.2764; Found: 405.2767.

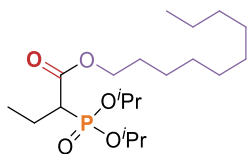

#### Decyl 2-(diisopropoxyphosphoryl)butanoate (5g)

This reaction was conducted on a 0.2 mmol scale with the general procedure. The crude product was purified by silica gel chromatography (PE/EA = 2:1) to afford the title compound as a colorless liquid (72.1 mg, 92% yield). The identity of the product was confirmed by  $^1H$  NMR,  $^{13}C$  NMR,  $^{31}P$  NMR and HRMS.

**$^1H$  NMR (400 MHz,  $CDCl_3$ )**  $\delta$  4.81 – 4.53 (m, 2H), 4.26 – 3.97 (m, 2H), 2.94 – 2.63 (m, 1H), 2.01 – 1.79 (m, 2H), 1.75 – 1.54 (m, 2H), 1.47 – 1.20 (m, 26H), 0.95 (t,  $J = 7.3$  Hz, 3H), 0.86 (t,  $J = 6.7$  Hz, 3H).

**$^{13}C$  NMR (101 MHz,  $CDCl_3$ )**  $\delta$  169.4 (d,  $J = 4.8$  Hz), 71.2 (d,  $J = 6.7$  Hz), 71.0 (d,  $J = 7.2$  Hz), 65.3, 48.3 (d,  $J = 132.8$  Hz), 31.8, 29.48, 29.46, 29.2 (d,  $J = 6.9$  Hz), 28.5, 25.8, 24.1 (d,  $J = 3.4$  Hz), 24.0 (d,  $J = 3.7$  Hz), 23.8 (d,  $J = 5.2$  Hz), 23.7 (d,  $J = 5.4$  Hz), 22.6, 20.8 (d,  $J = 5.1$  Hz), 14.1, 13.1, 12.9.

**$^{31}P$  NMR (162 MHz,  $CDCl_3$ )**  $\delta$  20.75.

**HRMS (ESI-TOF) m/z:**  $[M+H]^+$  calcd for  $C_{20}H_{42}O_5P^+$  393.2764; Found: 393.2761.

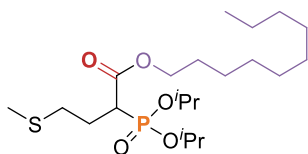

#### Decyl 2-(diisopropoxyphosphoryl)-4-(methylthio)butanoate (5h)

This reaction was conducted on a 0.2 mmol scale with the general procedure. The crude product was purified by silica gel chromatography (PE/EA = 2:1) to afford the title compound as a colorless liquid (66.6 mg, 76% yield). The identity of the product was confirmed by  $^1H$  NMR,  $^{13}C$  NMR,  $^{31}P$  NMR and HRMS.

**$^1H$  NMR (400 MHz,  $CDCl_3$ )**  $\delta$  4.92 – 4.50 (m, 2H), 4.28 – 3.95 (m, 2H), 3.33 – 2.99 (m, 1H), 2.73 – 2.52 (m, 1H), 2.50 – 2.38 (m, 1H), 2.34 – 2.20 (m, 1H), 2.18 – 2.08 (m, 1H), 2.06 (s, 3H), 1.85 – 1.49 (m, 2H), 1.53 – 1.13 (m, 26H), 0.86 (t,  $J = 6.7$  Hz, 3H).

**$^{13}C$  NMR (101 MHz,  $CDCl_3$ )**  $\delta$  169.0 (d,  $J = 5.2$  Hz), 71.5 (d,  $J = 6.7$  Hz), 71.3 (d,  $J = 7.0$  Hz), 65.5, 45.1 (d,  $J = 132.5$  Hz), 32.5 (d,  $J = 16.3$  Hz), 31.8, 29.50, 29.47, 29.2 (d,  $J = 6.2$  Hz), 28.5, 26.3 (d,  $J = 4.2$  Hz), 25.8, 24.1 (d,  $J = 3.6$  Hz), 24.0 (d,  $J = 3.8$  Hz), 23.8 (d,  $J = 5.1$  Hz), 23.7 (d,  $J = 5.2$  Hz), 22.6, 15.1, 14.1.

**$^{31}P$  NMR (162 MHz,  $CDCl_3$ )**  $\delta$  20.27.

**HRMS (ESI-TOF) m/z:**  $[M+H]^+$  calcd for  $C_{21}H_{44}O_5PS^+$  439.2642; Found: 439.2647.

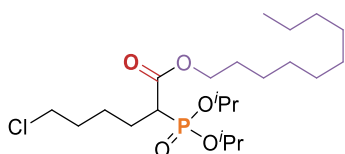

### Decyl 6-chloro-2-(diisopropoxyphosphoryl)hexanoate (5i)

This reaction was conducted on a 0.2 mmol scale with the general procedure. The crude product was purified by silica gel chromatography (PE/EA = 2:1) to afford the title compound as a colorless liquid (64.5 mg, 71% yield). The identity of the product was confirmed by  $^1\text{H}$  NMR,  $^{13}\text{C}$  NMR,  $^{31}\text{P}$  NMR and HRMS.

$^1\text{H}$  NMR (400 MHz,  $\text{CDCl}_3$ )  $\delta$  4.77 – 4.63 (m, 2H), 4.16 – 4.06 (m, 2H), 3.54 – 3.45 (m, 2H), 2.93 – 2.71 (m, 1H), 2.08 – 1.71 (m, 4H), 1.68 – 1.58 (m, 2H), 1.50 – 1.37 (m, 2H), 1.39 – 1.16 (m, 26H), 0.85 (t,  $J = 6.7$  Hz, 3H).

$^{13}\text{C}$  NMR (101 MHz,  $\text{CDCl}_3$ )  $\delta$  169.2 (d,  $J = 5.0$  Hz), 71.4 (d,  $J = 6.7$  Hz), 71.2 (d,  $J = 7.1$  Hz), 65.4, 46.5 (d,  $J = 132.8$  Hz), 44.4, 32.0, 31.8, 29.48, 29.46, 29.2 (d,  $J = 6.1$  Hz), 28.5, 26.4 (d,  $J = 4.9$  Hz), 25.8, 25.6, 24.1 (d,  $J = 3.6$  Hz), 24.0 (d,  $J = 3.8$  Hz), 23.8 (d,  $J = 5.2$  Hz), 23.7 (d,  $J = 5.3$  Hz), 22.6, 14.0.

$^{31}\text{P}$  NMR (162 MHz,  $\text{CDCl}_3$ )  $\delta$  20.45.

HRMS (ESI-TOF)  $m/z$ :  $[\text{M}+\text{H}]^+$  calcd for  $\text{C}_{22}\text{H}_{45}\text{O}_5\text{PCl}^+$  455.2688; Found: 455.2690.

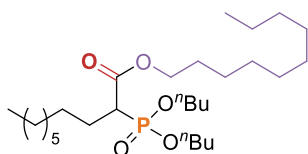

### Decyl 2-(dibutoxyphosphoryl)decanoate (5j)

This reaction was conducted on a 0.2 mmol scale with the general procedure. The crude product was purified by silica gel chromatography (PE/EA = 2:1) to afford the title compound as a colorless liquid (51.4 mg, 51% yield). The identity of the product was confirmed by  $^1\text{H}$  NMR,  $^{13}\text{C}$  NMR,  $^{31}\text{P}$  NMR and HRMS.

$^1\text{H}$  NMR (400 MHz,  $\text{CDCl}_3$ )  $\delta$  4.17 – 3.88 (m, 7H), 1.79 – 1.48 (m, 14H), 1.48 – 1.18 (m, 24H), 0.92 (t,  $J = 7.4$  Hz, 6H), 0.87 (t,  $J = 6.9$  Hz, 6H).

$^{13}\text{C}$  NMR (101 MHz,  $\text{CDCl}_3$ )  $\delta$  176.4, 65.2 (d,  $J = 5.0$  Hz), 65.1 (d,  $J = 4.8$  Hz), 64.2, 45.5, 32.6 (d,  $J = 6.1$  Hz), 32.2, 31.8 (d,  $J = 3.8$  Hz), 30.6 (d,  $J = 16.8$  Hz), 29.5 (d,  $J = 3.6$  Hz), 29.3 (d,  $J = 3.4$  Hz), 29.2, 29.1, 28.7, 26.1 (d,  $J = 27.3$  Hz), 24.8, 22.6 (d,  $J = 1.9$  Hz), 22.6, 22.4 (d,  $J = 5.1$  Hz), 18.8, 14.1, 13.9, 13.6.

$^{31}\text{P}$  NMR (162 MHz,  $\text{CDCl}_3$ )  $\delta$  20.64.

HRMS (ESI-TOF)  $m/z$ :  $[\text{M}+\text{H}]^+$  calcd for  $\text{C}_{28}\text{H}_{58}\text{O}_5\text{P}^+$  505.4016; Found: 505.4020.

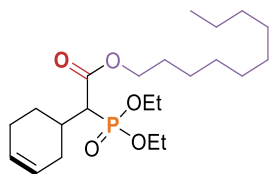

### Decyl 2-(cyclohex-3-en-1-yl)-2-(diethoxyphosphoryl)acetate (5k)

This reaction was conducted on a 0.2 mmol scale with the general procedure. The crude product was purified by silica gel chromatography (PE/EA = 2:1) to afford the title compound as a colorless liquid (39.1 mg, 47% yield). The identity of the product was confirmed by  $^1\text{H}$  NMR,  $^{13}\text{C}$  NMR,  $^{31}\text{P}$  NMR and HRMS.

$^1\text{H}$  NMR (400 MHz,  $\text{CDCl}_3$ )  $\delta$  5.83 – 5.42 (m, 2H), 4.25 – 3.86 (m, 6H), 3.04 – 2.77 (m, 1H), 2.42 – 2.32 (m, 1H), 2.12 – 1.93 (m, 4H), 1.68 – 1.60 (m, 4H), 1.44 – 1.12 (m, 20H), 0.87 (t,  $J = 6.7$  Hz, 3H).

$^{13}\text{C}$  NMR (101 MHz,  $\text{CDCl}_3$ )  $\delta$  169.3 (d,  $J = 4.4$  Hz), 169.2 (d,  $J = 4.4$  Hz), 126.8, 126.5, 125.6, 125.2, 65.4, 62.5 (d,  $J = 12.4$  Hz), 62.4 (d,  $J = 12.4$  Hz), 51.7 (d,  $J = 132.3$  Hz), 51.5 (d,  $J = 132.3$  Hz), 33.3, 33.2, 31.9, 30.2, 30.1 (d,  $J = 17.6$  Hz), 30.2, 29.5, 29.23 (d,  $J = 17.6$  Hz), 28.51, 28.49, 27.54, 27.46, 27.10, 27.07, 25.84, 25.83, 24.74, 24.71, 22.7, 16.39 (d,  $J = 5.5$  Hz), 16.36 (d,  $J = 5.5$  Hz), 14.1.

$^{31}\text{P}$  NMR (162 MHz,  $\text{CDCl}_3$ )  $\delta$  22.43, 22.36.

HRMS (ESI-TOF)  $m/z$ :  $[\text{M}+\text{H}]^+$  calcd for  $\text{C}_{22}\text{H}_{42}\text{O}_5\text{P}^+$  417.2764; Found: 417.2767.

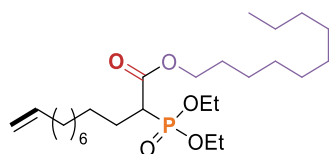

### Decyl 2-(diethoxyphosphoryl)dodec-11-enoate (5l)

This reaction was conducted on a 0.2 mmol scale with the general procedure. The crude product was purified by silica gel chromatography (PE/EA = 2:1) to afford the title compound as a colorless liquid (52.1 mg, 55% yield). The identity of the product was confirmed by  $^1\text{H}$  NMR,  $^{13}\text{C}$  NMR,  $^{31}\text{P}$  NMR and HRMS.

$^1\text{H}$  NMR (400 MHz,  $\text{CDCl}_3$ )  $\delta$  5.97 – 5.59 (m, 1H), 5.23 – 4.76 (m, 2H), 4.46 – 3.80 (m, 6H), 3.23 – 2.76 (m, 1H), 2.41 – 1.98 (m, 2H), 1.95 (d,  $J = 8.3$  Hz, 1H), 1.89 – 1.77 (m, 1H), 1.76 – 1.56 (m, 4H), 1.48 – 1.14 (m, 30H), 0.87 (t,  $J = 6.5$  Hz, 3H).

$^{13}\text{C}$  NMR (101 MHz,  $\text{CDCl}_3$ )  $\delta$  169.4 (d,  $J = 4.7$  Hz), 139.2, 114.1, 65.5, 62.62 (d,  $J = 7.1$  Hz), 62.58 (d,  $J = 7.3$  Hz), 45.9 (d,  $J = 131.3$  Hz), 33.8, 31.9, 29.5, 29.3 (d,  $J = 7.8$  Hz), 29.2 (d,  $J = 2.9$  Hz), 29.1, 29.0, 28.9, 28.6, 28.4 (d,  $J = 15.1$  Hz), 27.0 (d,  $J = 4.7$  Hz), 25.8, 22.7, 16.39 (d,  $J = 5.7$  Hz), 16.36 (d,  $J = 5.8$  Hz), 14.1.

$^{31}\text{P}$  NMR (162 MHz,  $\text{CDCl}_3$ )  $\delta$  23.06.

HRMS (ESI-TOF)  $m/z$ :  $[\text{M}+\text{H}]^+$  calcd for  $\text{C}_{26}\text{H}_{52}\text{O}_5\text{P}^+$  475.3547; Found: 475.3555.

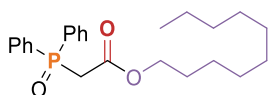

### Decyl 2-(diphenylphosphoryl)acetate (5m)

This reaction was conducted on a 0.2 mmol scale with the general procedure. The crude product was purified by silica gel chromatography (PE/EA = 2:1) to afford the title compound as a colorless liquid (61.6 mg, 77% yield). The identity of the product was confirmed by  $^1\text{H}$  NMR,  $^{13}\text{C}$  NMR,  $^{31}\text{P}$  NMR and HRMS.

$^1\text{H}$  NMR (400 MHz,  $\text{CDCl}_3$ )  $\delta$  8.14 – 7.68 (m, 4H), 7.68 – 7.35 (m, 6H), 3.92 (t,  $J$  = 6.7 Hz, 2H), 3.49 (d,  $J$  = 14.9 Hz, 2H), 1.56 – 1.32 (m, 2H), 1.32 – 1.01 (m, 14H), 0.88 (t,  $J$  = 6.8 Hz, 3H).

$^{13}\text{C}$  NMR (176 MHz,  $\text{CDCl}_3$ )  $\delta$  166.3, 132.3 (d,  $J$  = 3.0 Hz), 131.8 (d,  $J$  = 104.1 Hz), 131.1 (d,  $J$  = 10.0 Hz), 128.6 (d,  $J$  = 12.3 Hz), 65.8, 39.2 (d,  $J$  = 60.6 Hz), 31.9, 29.53, 29.45, 29.3, 29.2, 28.3, 25.7, 22.7, 14.1.

$^{31}\text{P}$  NMR (162 MHz,  $\text{CDCl}_3$ )  $\delta$  26.85.

HRMS (ESI-TOF)  $m/z$ :  $[\text{M}+\text{H}]^+$  calcd for  $\text{C}_{24}\text{H}_{34}\text{O}_3\text{P}^+$  401.2240; Found: 401.2243.

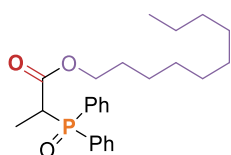

### Decyl 2-(diphenylphosphoryl)propanoate (5n)

This reaction was conducted on a 0.2 mmol scale with the general procedure. The crude product was purified by silica gel chromatography (PE/EA = 2:1) to afford the title compound as a colorless liquid (58.8 mg, 71% yield). The identity of the product was confirmed by  $^1\text{H}$  NMR,  $^{13}\text{C}$  NMR,  $^{31}\text{P}$  NMR and HRMS.

$^1\text{H}$  NMR (400 MHz,  $\text{CDCl}_3$ )  $\delta$  7.99 – 7.74 (m, 4H), 7.61 – 7.37 (m, 6H), 3.93 – 3.83 (m, 1H), 3.83 – 3.73 (m, 1H), 3.66 – 3.50 (m, 1H), 1.55 – 1.38 (m, 3H), 1.37 – 1.11 (m, 14H), 1.11 – 0.99 (m, 2H), 0.87 (t,  $J$  = 6.9 Hz, 3H).

$^{13}\text{C}$  NMR (101 MHz,  $\text{CDCl}_3$ )  $\delta$  170.3, 132.0 (d,  $J$  = 2.6 Hz), 132.0 (d,  $J$  = 2.7 Hz), 131.6 (d,  $J$  = 9.2 Hz), 131.2 (d,  $J$  = 9.2 Hz), 130.5 (d,  $J$  = 94.4 Hz), 128.6 (d,  $J$  = 11.8 Hz), 128.4 (d,  $J$  = 11.9 Hz), 65.5, 42.5 (d,  $J$  = 60.6 Hz), 31.8, 29.5, 29.4, 29.2, 29.1, 28.1, 25.6, 22.6, 14.1, 11.0 (d,  $J$  = 3.5 Hz).

$^{31}\text{P}$  NMR (162 MHz,  $\text{CDCl}_3$ )  $\delta$  31.06.

HRMS (ESI-TOF)  $m/z$ :  $[\text{M}+\text{H}]^+$  calcd for  $\text{C}_{24}\text{H}_{36}\text{O}_3\text{P}^+$  415.2397; Found: 415.2403.

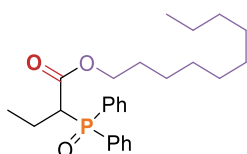

### Decyl 2-(diphenylphosphoryl)butanoate (5o)

This reaction was conducted on a 0.2 mmol scale with the general procedure. The crude product was purified by silica gel chromatography (PE/EA = 2:1) to afford the title compound as a colorless liquid



(59.9 mg, 70% yield). The identity of the product was confirmed by  $^1\text{H}$  NMR,  $^{13}\text{C}$  NMR,  $^{31}\text{P}$  NMR and HRMS.

**$^1\text{H}$  NMR (400 MHz,  $\text{CDCl}_3$ )**  $\delta$  7.93 – 7.84 (m, 2H), 7.84 – 7.75 (m, 2H), 7.57 – 7.36 (m, 6H), 3.93 – 3.82 (m, 1H), 3.80 – 3.70 (m, 1H), 3.43 – 3.31 (m, 1H), 2.14 – 1.96 (m, 1H), 1.93 – 1.79 (m, 1H), 1.41 – 1.07 (m, 16H), 0.97 (t,  $J = 7.3$  Hz, 3H), 0.87 (t,  $J = 6.8$  Hz, 3H).

**$^{13}\text{C}$  NMR (101 MHz,  $\text{CDCl}_3$ )**  $\delta$  169.8, 132.0 (d,  $J = 2.7$  Hz), 132.0 (d,  $J = 2.7$  Hz), 131.7 (d,  $J = 9.2$  Hz), 131.2 (d,  $J = 9.2$  Hz), 130.5 (d,  $J = 100.1$  Hz), 128.5 (d,  $J = 12.0$  Hz), 128.3 (d,  $J = 12.1$  Hz), 65.4, 51.2 (d,  $J = 59.8$  Hz), 31.8, 29.5, 29.4, 29.2, 29.1, 28.1, 25.7, 22.6, 20.2 (d,  $J = 2.4$  Hz), 14.1, 13.3 (d,  $J = 13.3$  Hz).

**$^{31}\text{P}$  NMR (162 MHz,  $\text{CDCl}_3$ )**  $\delta$  29.18.

**HRMS (ESI-TOF) m/z:**  $[\text{M}+\text{H}]^+$  calcd for  $\text{C}_{26}\text{H}_{38}\text{O}_3\text{P}^+$  429.2553; Found: 429.2560.

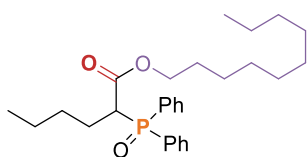

#### Decyl 2-(diphenylphosphoryl)hexanoate (5p)

This reaction was conducted on a 0.2 mmol scale with the general procedure. The crude product was purified by silica gel chromatography (PE/EA = 2:1) to afford the title compound as a colorless liquid (56.7 mg, 62% yield). The identity of the product was confirmed by  $^1\text{H}$  NMR,  $^{13}\text{C}$  NMR,  $^{31}\text{P}$  NMR and HRMS.

**$^1\text{H}$  NMR (400 MHz,  $\text{CDCl}_3$ )**  $\delta$  8.08 – 7.84 (m, 2H), 7.84 – 7.75 (m, 2H), 7.61 – 7.39 (m, 6H), 3.97 – 3.82 (m, 1H), 3.81 – 3.63 (m, 1H), 3.55 – 3.32 (m, 1H), 2.08 – 1.95 (m, 1H), 1.89 – 1.74 (m, 1H), 1.44 – 1.12 (m, 20H), 0.88 (t,  $J = 6.8$  Hz, 3H), 0.81 (t,  $J = 6.9$  Hz, 3H).

**$^{13}\text{C}$  NMR (101 MHz,  $\text{CDCl}_3$ )**  $\delta$  170.0 (d,  $J = 2.3$  Hz), 132.0 (d,  $J = 3.3$  Hz), 132.0 (d,  $J = 3.3$  Hz), 131.7 (d,  $J = 9.3$  Hz), 131.2 (d,  $J = 9.3$  Hz), 130.5 (d,  $J = 100.0$  Hz), 128.6 (d,  $J = 11.9$  Hz), 128.3 (d,  $J = 12.0$  Hz), 65.4, 49.5 (d,  $J = 59.7$  Hz), 31.8, 30.9 (d,  $J = 12.3$  Hz), 29.5, 29.4, 29.3, 29.1, 28.1, 26.2 (d,  $J = 2.6$  Hz), 25.7, 22.6, 22.2, 14.1, 13.7.

**$^{31}\text{P}$  NMR (162 MHz,  $\text{CDCl}_3$ )**  $\delta$  29.26.

**HRMS (ESI-TOF) m/z:**  $[\text{M}+\text{H}]^+$  calcd for  $\text{C}_{28}\text{H}_{42}\text{O}_3\text{P}^+$  457.2866; Found: 457.2873.

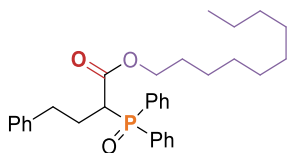

#### Decyl 2-(diphenylphosphoryl)-4-phenylbutanoate (5q)

This reaction was conducted on a 0.2 mmol scale with the general procedure. The crude product was purified by silica gel chromatography (PE/EA = 2:1) to afford the title compound as a colorless liquid (57.5 mg, 57% yield). The identity of the product was confirmed by  $^1\text{H}$  NMR,  $^{13}\text{C}$  NMR,  $^{31}\text{P}$  NMR and HRMS.

**$^1\text{H}$  NMR (400 MHz,  $\text{CDCl}_3$ )**  $\delta$  7.85 – 7.75 (m, 2H), 7.74 – 7.63 (m, 2H), 7.59 – 7.47 (m, 2H), 7.48 – 7.38 (m, 4H), 7.31 – 7.19 (m, 3H), 7.07 (d,  $J = 7.0$  Hz, 2H), 3.96 – 3.83 (m, 1H), 3.80 – 3.69 (m, 1H),

3.46 (t,  $J = 11.3$  Hz, 1H), 2.83 – 2.71 (m, 1H), 2.62 – 2.50 (m, 1H), 2.50 – 2.31 (m, 1H), 2.19 – 2.00 (m, 1H), 1.58 – 1.01 (m, 16H), 0.89 (t,  $J = 6.8$  Hz, 3H).

$^{13}\text{C}$  NMR (101 MHz,  $\text{CDCl}_3$ )  $\delta$  169.6, 132.0 (d,  $J = 3.1$  Hz), 132.0 (d,  $J = 3.3$  Hz), 131.6 (d,  $J = 9.3$  Hz), 131.4 (d,  $J = 100.6$  Hz), 131.2 (d,  $J = 9.1$  Hz), 130.5 (d,  $J = 100.8$  Hz), 128.6, 128.5 (d,  $J = 12.0$  Hz), 128.4, 128.3, 126.2, 65.5, 48.2 (d,  $J = 59.4$  Hz), 34.5 (d,  $J = 12.7$  Hz), 31.8, 29.5, 29.4, 29.3, 29.1, 28.2, 28.1, 25.7, 22.6, 14.1.

$^{31}\text{P}$  NMR (162 MHz,  $\text{CDCl}_3$ )  $\delta$  29.55.

HRMS (ESI-TOF)  $m/z$ :  $[\text{M}+\text{H}]^+$  calcd for  $\text{C}_{32}\text{H}_{42}\text{O}_3\text{P}^+$  505.2866; Found: 505.2869.

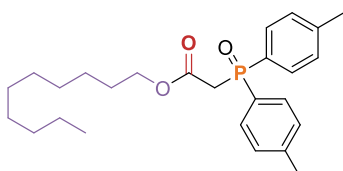

### Decyl 2-(di-p-tolylphosphoryl)acetate (5r)

This reaction was conducted on a 0.2 mmol scale with the general procedure. The crude product was purified by silica gel chromatography (PE/EA = 2:1) to afford the title compound as a colorless liquid (63.3 mg, 74% yield). The identity of the product was confirmed by  $^1\text{H}$  NMR,  $^{13}\text{C}$  NMR,  $^{31}\text{P}$  NMR and HRMS.

$^1\text{H}$  NMR (400 MHz,  $\text{CDCl}_3$ )  $\delta$  7.71 – 7.62 (m, 4H), 7.28 (d,  $J = 8.7$  Hz, 4H), 3.93 (t,  $J = 6.7$  Hz, 2H), 3.45 (d,  $J = 14.8$  Hz, 2H), 2.40 (s, 6H), 1.58 – 1.34 (m, 2H), 1.34 – 1.03 (m, 14H), 0.88 (t,  $J = 6.8$  Hz, 3H).

$^{13}\text{C}$  NMR (176 MHz,  $\text{CDCl}_3$ )  $\delta$  166.5, 142.7 (d,  $J = 2.6$  Hz), 131.2 (d,  $J = 10.0$  Hz), 129.3 (d,  $J = 12.8$  Hz), 128.8 (d,  $J = 106.5$  Hz), 65.7, 39.3 (d,  $J = 60.5$  Hz), 31.9, 29.6, 29.5, 29.3, 29.2, 28.3, 25.7, 22.7, 21.6, 14.1.

$^{31}\text{P}$  NMR (162 MHz,  $\text{CDCl}_3$ )  $\delta$  27.32.

HRMS (ESI-TOF)  $m/z$ :  $[\text{M}+\text{H}]^+$  calcd for  $\text{C}_{26}\text{H}_{38}\text{O}_3\text{P}^+$  429.2553; Found: 429.2560.

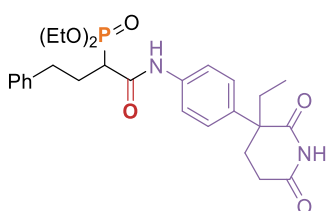

### Diethyl (1-(((4-(3-ethyl-2,6-dioxopiperidin-3-yl)phenyl)amino)-1-oxo-4-phenylbutan-2-yl)phosphonate (6a)

This reaction was conducted on a 0.2 mmol scale with the general procedure. The crude product was purified by silica gel chromatography (PE/EA = 1:2) to afford the title compound as a brown liquid (70.9 mg, 69% yield). The identity of the product was confirmed by  $^1\text{H}$  NMR,  $^{13}\text{C}$  NMR,  $^{31}\text{P}$  NMR and HRMS.

$^1\text{H}$  NMR (400 MHz,  $\text{CDCl}_3$ )  $\delta$  9.08 (s, 1H), 9.01 (s, 1H), 7.50 (d,  $J = 14.5$  Hz, 2H), 7.29 – 7.24 (m, 2H), 7.23 – 7.12 (m, 5H), 4.23 – 3.85 (m, 4H), 3.27 – 2.91 (m, 1H), 2.91 – 2.78 (m, 1H), 2.76 – 2.51 (m, 2H), 2.52 – 2.27 (m, 3H), 2.27 – 2.16 (m, 1H), 2.14 – 1.99 (m, 2H), 1.95 – 1.82 (m, 1H), 1.44 – 1.20 (m, 6H), 0.99 – 0.75 (m, 3H).

**<sup>13</sup>C NMR (101 MHz, CDCl<sub>3</sub>)** δ 175.7 (d, *J* = 34.5 Hz), 172.9 (d, *J* = 46.0 Hz), 165.5 (d, *J* = 2.8 Hz), 140.7, 137.5, 134.5 (d, *J* = 4.6 Hz), 128.6, 128.4, 126.7 (d, *J* = 2.2 Hz), 126.2, 120.2 (d, *J* = 12.6 Hz), 63.3 (d, *J* = 6.9 Hz), 62.7 (d, *J* = 5.8 Hz), 50.7 (d, *J* = 5.8 Hz), 46.1 (d, *J* = 128.6 Hz), 34.1 (d, *J* = 15.8 Hz), 32.7, 29.3 (d, *J* = 5.1 Hz), 28.3, 27.2 (d, *J* = 15.2 Hz), 16.4 (d, *J* = 5.9 Hz), 16.3 (d, *J* = 6.1 Hz), 9.1 (d, *J* = 7.2 Hz).

**<sup>31</sup>P NMR (162 MHz, CDCl<sub>3</sub>)** δ 24.88.

**HRMS (ESI-TOF) m/z:** [M+H]<sup>+</sup> calcd for C<sub>27</sub>H<sub>36</sub>N<sub>2</sub>O<sub>6</sub>P<sup>+</sup> 515.2305; Found: 505.2311.

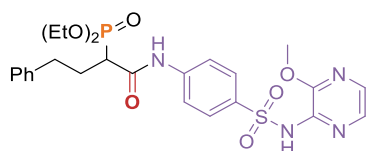

**Diethyl (1-((4-(N-(3-methoxypyrazin-2-yl)sulfamoyl)phenyl)amino)-1-oxo-4-phenylbutan-2-yl)phosphonate (6b)**

This reaction was conducted on a 0.2 mmol scale with the general procedure. The crude product was purified by silica gel chromatography (PE/EA = 1:2) to afford the title compound as a brown liquid (60.7 mg, 54% yield). The identity of the product was confirmed by <sup>1</sup>H NMR, <sup>13</sup>C NMR, <sup>31</sup>P NMR and HRMS.

**<sup>1</sup>H NMR (400 MHz, CDCl<sub>3</sub>)** δ 9.78 (s, 1H), 7.75 (d, *J* = 9.0 Hz, 4H), 7.70 (s, 1H), 7.54 (d, *J* = 8.4 Hz, 2H), 7.33 – 7.22 (m, 2H), 7.21 – 7.12 (m, 3H), 4.25 – 4.12 (m, 2H), 4.07 – 3.84 (m, 5H), 3.15 – 2.93 (m, 1H), 2.92 – 2.70 (m, 1H), 2.63 – 2.48 (m, 1H), 2.48 – 2.35 (m, 1H), 2.19 – 1.94 (m, 1H), 1.37 (t, *J* = 7.0 Hz, 3H), 1.24 (t, *J* = 7.2 Hz, 3H).

**<sup>13</sup>C NMR (101 MHz, CDCl<sub>3</sub>)** δ 166.1, 142.7, 140.5, 133.7, 129.3, 128.6, 128.4, 126.2, 118.6, 63.7, 62.5, 54.1, 46.0 (d, *J* = 129.2 Hz), 34.0 (d, *J* = 14.8 Hz), 27.5, 16.4 (d, *J* = 5.8 Hz), 16.2 (d, *J* = 6.1 Hz).

**<sup>31</sup>P NMR (162 MHz, CDCl<sub>3</sub>)** δ 24.70.

**HRMS (ESI-TOF) m/z:** [M+H]<sup>+</sup> calcd for C<sub>25</sub>H<sub>32</sub>N<sub>4</sub>O<sub>7</sub>PS<sup>+</sup> 563.1724; Found: 563.1727.

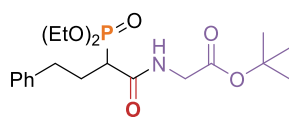

**Tert-butyl (2-(diethoxyphosphoryl)-4-phenylbutanoyl)glycinate (6c)**

This reaction was conducted on a 0.2 mmol scale with the general procedure. The crude product was purified by silica gel chromatography (PE/EA = 1:2) to afford the title compound as a brown liquid (66.9 mg, 81% yield). The identity of the product was confirmed by <sup>1</sup>H NMR, <sup>13</sup>C NMR, <sup>31</sup>P NMR and HRMS.

**<sup>1</sup>H NMR (400 MHz, CDCl<sub>3</sub>)** δ 7.34 – 7.25 (m, 2H), 7.24 – 7.14 (m, 3H), 6.81 (s, 1H), 4.19 – 4.01 (m, 4H), 3.96 (t, *J* = 5.5 Hz, 2H), 2.90 – 2.72 (m, 2H), 2.72 – 2.53 (m, 1H), 2.41 – 2.27 (m, 1H), 2.18 – 2.04 (m, 1H), 1.48 (s, 9H), 1.34 – 1.18 (m, 6H).

**<sup>13</sup>C NMR (101 MHz, CDCl<sub>3</sub>)** δ 168.5, 167.4 (d, *J* = 2.6 Hz), 140.8, 128.6, 128.4, 126.1, 82.1, 62.8 (d, *J* = 6.7 Hz), 62.7 (d, *J* = 6.7 Hz), 45.1 (d, *J* = 130.1 Hz), 42.4, 34.0 (d, *J* = 14.5 Hz), 28.6 (d, *J* = 4.4 Hz), 28.0, 16.31 (d, *J* = 2.1 Hz), 16.27 (d, *J* = 2.0 Hz).

**<sup>31</sup>P NMR (162 MHz, CDCl<sub>3</sub>)** δ 24.88.

**HRMS (ESI-TOF) m/z:** [M+H]<sup>+</sup> calcd for C<sub>20</sub>H<sub>33</sub>NO<sub>6</sub>P<sup>+</sup> 414.2040; Found: 414.2031.

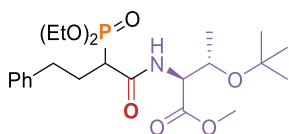

**Methyl *O*-(tert-butyl)-*N*-(2-(diethoxyphosphoryl)-4-phenylbutanoyl)-*L*-allothreoninate (6d)**

This reaction was conducted on a 0.2 mmol scale with the general procedure. The crude product was purified by silica gel chromatography (PE/EA = 1:2) to afford the title compound as a brown liquid (72.5 mg, 77% yield). The identity of the product was confirmed by <sup>1</sup>H NMR, <sup>13</sup>C NMR, <sup>31</sup>P NMR and HRMS.

**<sup>1</sup>H NMR (400 MHz, CDCl<sub>3</sub>)** δ 7.46 – 7.08 (m, 5H), 6.74 (s, 1H), 4.61 – 4.50 (m, 1H), 4.31 – 4.23 (m, 1H), 4.20 – 4.03 (m, 5H), 3.73 (s, 3H), 2.92 – 2.72 (m, 2H), 2.70 – 2.52 (m, 1H), 2.48 – 2.26 (m, 1H), 1.37 – 1.27 (m, 6H), 1.24 (d, *J* = 6.3 Hz, 3H), 1.13 (s, 9H).

**<sup>13</sup>C NMR (101 MHz, CDCl<sub>3</sub>)** δ 171.0, 167.8 (d, *J* = 3.9 Hz), 140.9, 128.6, 128.4, 126.0, 74.0, 67.3, 62.6 (d, *J* = 1.7 Hz), 62.5 (d, *J* = 1.8 Hz), 58.2, 52.1, 45.4 (d, *J* = 131.4 Hz), 33.8 (d, *J* = 15.7 Hz), 28.6 (d, *J* = 4.2 Hz), 28.3, 28.3, 20.9, 16.3 (d, *J* = 6.0 Hz).

**<sup>31</sup>P NMR (162 MHz, CDCl<sub>3</sub>)** δ 24.30.

**HRMS (ESI-TOF) m/z:** [M+H]<sup>+</sup> calcd for C<sub>23</sub>H<sub>39</sub>NO<sub>7</sub>P<sup>+</sup> 472.2459; Found: 472.2461.

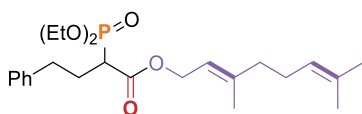

**(*E*)-3,7-Dimethylocta-2,6-dien-1-yl 2-(diethoxyphosphoryl)-4-phenylbutanoate (6e)**

This reaction was conducted on a 0.2 mmol scale with the general procedure. The crude product was purified by silica gel chromatography (PE/EA = 2:1) to afford the title compound as a colorless liquid (51.5 mg, 59% yield). The identity of the product was confirmed by <sup>1</sup>H NMR, <sup>13</sup>C NMR, <sup>31</sup>P NMR and HRMS.

**<sup>1</sup>H NMR (400 MHz, CDCl<sub>3</sub>)** δ 7.33 – 7.24 (m, 2H), 7.23 – 7.13 (m, 3H), 5.49 – 5.27 (m, 1H), 5.28 – 5.02 (m, 1H), 4.84 – 4.55 (m, 2H), 4.37 – 3.96 (m, 5H), 3.31 – 2.86 (m, 1H), 2.80 – 2.66 (m, 1H), 2.65 – 2.52 (m, 1H), 2.32 – 2.31 (m, 1H), 2.24 – 2.01 (m, 4H), 1.77 – 1.53 (m, 9H), 1.41 – 1.20 (m, 6H).

**<sup>13</sup>C NMR (101 MHz, CDCl<sub>3</sub>)** δ 169.0 (d, *J* = 4.9 Hz), 142.7, 140.5, 131.9, 128.5, 128.4, 126.2, 123.6, 117.9, 62.7 (d, *J* = 4.2 Hz), 62.6 (d, *J* = 4.8 Hz), 62.3, 45.0 (d, *J* = 130.9 Hz), 39.5, 34.3 (d, *J* = 15.4 Hz), 28.7 (d, *J* = 4.6 Hz), 26.3, 25.6, 17.6, 16.5, 16.33 (d, *J* = 3.3 Hz), 16.29 (d, *J* = 3.5 Hz).

**<sup>31</sup>P NMR (162 MHz, CDCl<sub>3</sub>)** δ 22.54.

**HRMS (ESI-TOF) m/z:** [M+H]<sup>+</sup> calcd for C<sub>24</sub>H<sub>38</sub>O<sub>5</sub>P<sup>+</sup> 437.2451; Found: 437.2460.

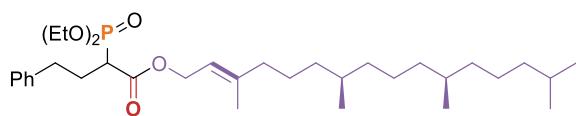

**(7*R*,11*R*,*E*)-3,7,11,15-Tetramethylhexadec-2-en-1-yl 2-(diethoxyphosphoryl)-4-phenylbutanoate (6f)**

This reaction was conducted on a 0.2 mmol scale with the general procedure. The crude product was purified by silica gel chromatography (PE/EA = 2:1) to afford the title compound as a colorless liquid (78.7 mg, 68% yield). The identity of the product was confirmed by  $^1\text{H}$  NMR,  $^{13}\text{C}$  NMR,  $^{31}\text{P}$  NMR and HRMS.

$^1\text{H}$  NMR (400 MHz,  $\text{CDCl}_3$ )  $\delta$  7.33 – 7.25 (m, 2H), 7.23 – 7.13 (m, 3H), 5.37 (t,  $J = 7.0$  Hz, 1H), 4.68 (d,  $J = 7.0$  Hz, 2H), 4.36 – 3.92 (m, 4H), 3.03 – 2.89 (m, 1H), 2.78 – 2.67 (m, 1H), 2.64 – 2.52 (m, 1H), 2.40 – 2.23 (m, 1H), 2.22 – 2.09 (m, 1H), 2.13 – 1.93 (m, 2H), 1.72 (s, 3H), 1.61 – 1.47 (m, 1H), 1.46 – 1.19 (m, 19H), 1.17 – 1.11 (m, 2H), 1.11 – 0.99 (m, 3H), 0.95 – 0.60 (m, 12H).

$^{13}\text{C}$  NMR (101 MHz,  $\text{CDCl}_3$ )  $\delta$  169.0 (d,  $J = 5.0$  Hz), 142.7, 140.5, 132.2, 128.5, 128.4, 126.2, 123.5, 118.8, 62.7 (d,  $J = 2.8$  Hz), 62.6 (d,  $J = 3.3$  Hz), 62.0, 45.0 (d,  $J = 130.9$  Hz), 34.3 (d,  $J = 15.3$  Hz), 32.2, 28.7 (d,  $J = 4.5$  Hz), 26.6, 25.7, 23.5, 17.6, 16.31 (d,  $J = 4.0$  Hz), 16.28 (d,  $J = 4.1$  Hz).

$^{31}\text{P}$  NMR (162 MHz,  $\text{CDCl}_3$ )  $\delta$  22.54.

HRMS (ESI-TOF)  $m/z$ :  $[\text{M}+\text{H}]^+$  calcd for  $\text{C}_{34}\text{H}_{60}\text{O}_5\text{P}^+$  579.4173; Found: 579.4174.

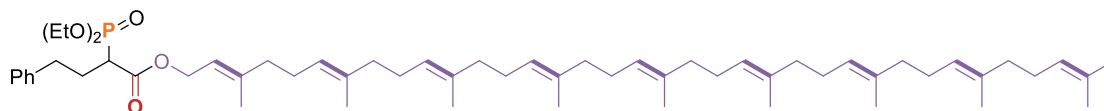

**(2*E*,6*E*,10*E*,14*E*,18*E*,22*E*,26*E*,30*E*)-3,7,11,15,19,23,27,31,35-Nonamethylhexatriaconta-2,6,10,14,18,22,26,30,34-nonaen-1-yl 2-(diethoxyphosphoryl)-4-phenylbutanoate (6g)**

This reaction was conducted on a 0.2 mmol scale with the general procedure. The crude product was purified by silica gel chromatography (PE/EA = 2:1) to afford the title compound as a colorless liquid (93.0 mg, 51% yield). The identity of the product was confirmed by  $^1\text{H}$  NMR,  $^{13}\text{C}$  NMR,  $^{31}\text{P}$  NMR and HRMS.

$^1\text{H}$  NMR (400 MHz,  $\text{CDCl}_3$ )  $\delta$  7.30 – 7.25 (m, 2H), 7.23 – 7.13 (m, 3H), 5.43 – 5.35 (m, 1H), 5.12 (d,  $J = 6.8$  Hz, 8H), 4.68 (d,  $J = 7.0$  Hz, 2H), 4.18 – 4.06 (m, 4H), 3.04 – 2.86 (m, 1H), 2.78 – 2.67 (m, 1H), 2.64 – 2.52 (m, 1H), 2.40 – 2.23 (m, 1H), 2.21 – 1.94 (m, 33H), 1.73 (s, 3H), 1.70 – 1.56 (m, 27H), 1.39 – 1.24 (m, 6H).

$^{13}\text{C}$  NMR (101 MHz,  $\text{CDCl}_3$ )  $\delta$  169.0 (d,  $J = 4.9$  Hz), 142.9, 140.5, 135.6, 135.0, 134.92, 134.90, 134.87, 131.2, 128.6, 128.4, 126.2, 124.4, 124.23, 124.19, 124.1, 123.5, 117.9, 62.7 (d,  $J = 4.9$  Hz), 62.6, 62.2, 45.0 (d,  $J = 130.8$  Hz), 39.73, 39.67, 39.6, 34.3 (d,  $J = 15.3$  Hz), 29.7, 28.7 (d,  $J = 4.5$  Hz), 26.73, 26.68 (d,  $J = 2.0$  Hz), 26.7, 26.3, 25.7, 17.7, 16.5, 16.4 (d,  $J = 3.4$  Hz), 16.3 (d,  $J = 3.5$  Hz), 16.0.

$^{31}\text{P}$  NMR (162 MHz,  $\text{CDCl}_3$ )  $\delta$  22.53.

HRMS (ESI-TOF)  $m/z$ :  $[\text{M}+\text{H}]^+$  calcd for  $\text{C}_{59}\text{H}_{94}\text{O}_5\text{P}^+$  913.6833; Found: 913.6824.

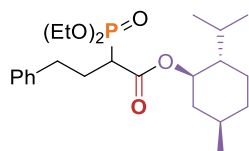

**(1*R*,2*S*,5*R*)-2-Isopropyl-5-methylcyclohexyl 2-(diethoxyphosphoryl)-4-phenylbutanoate (6h)**

This reaction was conducted on a 0.2 mmol scale with the general procedure. The crude product was purified by silica gel chromatography (PE/EA = 2:1) to afford the title compound as a colorless liquid (75.3 mg, 86% yield). The identity of the product was confirmed by <sup>1</sup>H NMR, <sup>13</sup>C NMR, <sup>31</sup>P NMR and HRMS.

**<sup>1</sup>H NMR (400 MHz, CDCl<sub>3</sub>)** δ 7.32 – 7.25 (m, 2H), 7.22 – 7.14 (m, 3H), 4.85 – 4.73 (m, 1H), 4.20 – 4.02 (m, 4H), 3.02 – 2.86 (m, 1H), 2.80 – 2.68 (m, 1H), 2.63 – 2.49 (m, 1H), 2.39 – 2.24 (m, 1H), 2.26 – 2.11 (m, 1H), 2.11 – 1.90 (m, 2H), 1.70 (d, *J* = 11.4 Hz, 2H), 1.64 – 1.39 (m, 2H), 1.39 – 1.17 (m, 6H), 1.17 – 1.00 (m, 2H), 0.97 – 0.85 (m, 7H), 0.79 (t, *J* = 6.7 Hz, 3H).

**<sup>13</sup>C NMR (101 MHz, Chloroform-*d*)** δ 168.5 (d, *J* = 5.0 Hz), 140.5, 128.5, 128.4, 126.2, 75.5, 62.6 (d, *J* = 2.6 Hz), 46.8 (d, *J* = 8.4 Hz), 44.6, 45.25 (d, *J* = 131.6 Hz), 40.6, 34.1 (d, *J* = 2.2 Hz), 31.3 (d, *J* = 3.4 Hz), 28.9 (d, *J* = 4.4 Hz), 25.4, 22.8, 22.0, 20.8, 16.3 (d, *J* = 2.7 Hz), 16.2 (d, *J* = 2.6 Hz), 15.9, 15.7.

**<sup>31</sup>P NMR (162 MHz, CDCl<sub>3</sub>)** δ 22.91.

**HRMS (ESI-TOF) m/z:** [M+H]<sup>+</sup> calcd for C<sub>24</sub>H<sub>40</sub>O<sub>5</sub>P<sup>+</sup> 439.2608; Found: 439.2608.

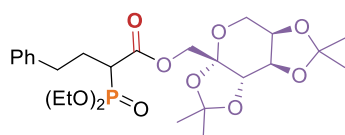

**((3*aS*,5*aR*,8*aR*,8*bS*)-2,2,7,7-Tetramethyltetrahydro-3*aH*-bis([1,3]dioxolo)[4,5-*b*:4',5'-*d*]pyran-3*a*-yl)methyl 2-(diethoxyphosphoryl)-4-phenylbutanoate (6i)**

This reaction was conducted on a 0.2 mmol scale with the general procedure. The crude product was purified by silica gel chromatography (PE/EA = 1:2) to afford the title compound as a colorless liquid (75.9 mg, 70% yield). The identity of the product was confirmed by <sup>1</sup>H NMR, <sup>13</sup>C NMR, <sup>31</sup>P NMR and HRMS.

**<sup>1</sup>H NMR (400 MHz, CDCl<sub>3</sub>)** δ 7.33 – 7.25 (m, 2H), 7.24 – 7.16 (m, 3H), 4.61 (t, *J* = 10.0 Hz, 1H), 4.42 – 4.27 (m, 2H), 4.24 (d, *J* = 7.7 Hz, 1H), 4.19 – 4.08 (m, 5H), 3.93 (d, *J* = 13.0 Hz, 1H), 3.77 (d, *J* = 13.1 Hz, 1H), 3.07 – 2.94 (m, 1H), 2.85 – 2.68 (m, 1H), 2.69 – 2.55 (m, 1H), 2.43 – 2.27 (m, 1H), 2.27 – 2.10 (m, 1H), 1.55 (s, 3H), 1.46 (s, 3H), 1.39 (s, 3H), 1.35 – 1.28 (m, 9H).

**<sup>13</sup>C NMR (101 MHz, CDCl<sub>3</sub>)** δ 168.5 (d, *J* = 5.2 Hz), 140.4, 128.6, 128.5, 126.2, 109.1, 108.8, 101.3, 70.8, 70.2, 70.0, 66.1, 62.9 (d, *J* = 6.6 Hz), 62.8 (d, *J* = 6.5 Hz), 61.2, 44.9 (d, *J* = 130.8 Hz), 34.2 (d, *J* = 14.7 Hz), 28.6 (d, *J* = 4.5 Hz), 26.5, 25.9, 25.3, 24.1, 16.32 (d, *J* = 5.9 Hz), 16.27 (d, *J* = 6.0 Hz).

**<sup>31</sup>P NMR (162 MHz, CDCl<sub>3</sub>)** δ 22.17.

**HRMS (ESI-TOF) m/z:** [M+H]<sup>+</sup> calcd for C<sub>26</sub>H<sub>40</sub>O<sub>10</sub>P<sup>+</sup> 543.2354; Found: 543.2362.

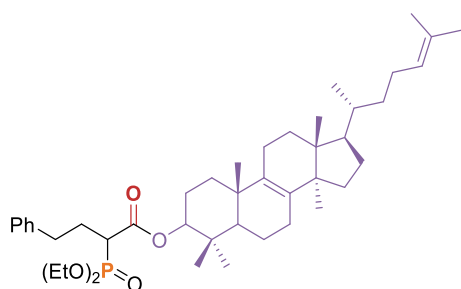

**(10*S*,13*R*,14*R*,17*R*)-4,4,10,13,14-Pentamethyl-17-((*R*)-6-methylhept-5-en-2-yl)-2,3,4,5,6,7,10,11,12,13,14,15,16,17-tetradecahydro-1*H*-cyclopenta[*a*]phenanthren-3-yl 2-(diethoxyphosphoryl)-4-phenylbutanoate (6j)**

This reaction was conducted on a 0.2 mmol scale with the general procedure. The crude product was purified by silica gel chromatography (PE/EA = 2:1) to afford the title compound as a colorless liquid (82.1 mg, 58% yield). The identity of the product was confirmed by  $^1\text{H}$  NMR,  $^{13}\text{C}$  NMR,  $^{31}\text{P}$  NMR and HRMS.

$^1\text{H}$  NMR (400 MHz,  $\text{CDCl}_3$ )  $\delta$  7.28 (t,  $J = 7.4$  Hz, 2H), 7.24 – 7.15 (m, 3H), 5.10 (t,  $J = 7.0$  Hz, 1H), 4.64 – 4.43 (m, 1H), 4.41 – 3.98 (m, 4H), 3.04 – 2.87 (m, 1H), 2.85 – 2.66 (m, 1H), 2.65 – 2.52 (m, 1H), 2.44 – 2.26 (m, 1H), 2.22 – 2.11 (m, 1H), 2.12 – 1.99 (m, 4H), 1.96 – 1.83 (m, 2H), 1.80 – 1.64 (m, 8H), 1.63 – 1.43 (m, 6H), 1.42 – 1.24 (m, 10H), 1.22 – 1.10 (m, 3H), 1.02 (s, 3H), 1.00 – 0.81 (m, 14H), 0.69 (s, 3H).

$^{13}\text{C}$  NMR (101 MHz,  $\text{CDCl}_3$ )  $\delta$  168.6 (d,  $J = 18.4$  Hz), 140.5 (d,  $J = 3.6$  Hz), 134.6 (d,  $J = 1.7$  Hz), 134.1, 130.9, 128.5 (d,  $J = 3.1$  Hz), 128.5 (d,  $J = 1.9$  Hz), 126.2, 125.2, 82.3 (d,  $J = 13.5$  Hz), 62.6 (d,  $J = 3.3$  Hz), 62.5 (d,  $J = 3.5$  Hz), 50.6 (d,  $J = 6.3$  Hz), 50.4 (d,  $J = 11.8$  Hz), 49.8, 46.1 (d,  $J = 8.2$  Hz), 44.8 (d,  $J = 9.1$  Hz), 44.4 (d,  $J = 2.2$  Hz), 39.5, 37.9 (d,  $J = 8.8$  Hz), 36.9, 36.4, 36.3 (d,  $J = 8.9$  Hz), 35.2 (d,  $J = 3.1$  Hz), 34.4 (d,  $J = 7.6$  Hz), 34.3, 30.9 (d,  $J = 13.6$  Hz), 28.9, 28.5, 28.2, 28.0, 27.8 (d,  $J = 3.3$  Hz), 26.3, 25.7, 24.9, 24.2 (d,  $J = 1.8$  Hz), 24.0 (d,  $J = 11.4$  Hz), 22.8, 22.5, 21.0, 19.2, 18.6 (d,  $J = 8.6$  Hz), 18.1, 17.6, 16.6, 16.4 (d,  $J = 5.6$  Hz), 15.7.

$^{31}\text{P}$  NMR (162 MHz,  $\text{CDCl}_3$ )  $\delta$  23.07, 22.97.

HRMS (ESI-TOF)  $m/z$ :  $[\text{M}+\text{H}]^+$  calcd for  $\text{C}_{44}\text{H}_{70}\text{O}_5\text{P}^+$  709.4955; Found: 709.4960.

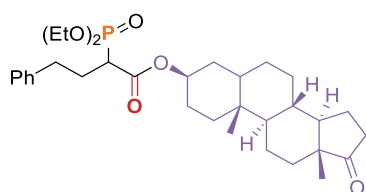

**(3*R*,8*S*,9*R*,10*R*,13*R*,14*R*)-10,13-Dimethyl-17-oxohexadecahydro-1*H*-cyclopenta[*a*]phenanthren-3-yl 2-(diethoxyphosphoryl)-4-phenylbutanoate (6k)**

This reaction was conducted on a 0.2 mmol scale with the general procedure. The crude product was purified by silica gel chromatography (PE/EA = 2:1) to afford the title compound as a colorless liquid (88.1 mg, 77% yield). The identity of the product was confirmed by  $^1\text{H}$  NMR,  $^{13}\text{C}$  NMR,  $^{31}\text{P}$  NMR and HRMS.

$^1\text{H}$  NMR (400 MHz,  $\text{CDCl}_3$ )  $\delta$  7.32 – 7.24 (m, 2H), 7.24 – 7.14 (m, 3H), 4.87 – 4.74 (m, 1H), 4.19 – 4.02 (m, 4H), 2.99 – 2.85 (m, 1H), 2.79 – 2.67 (m, 1H), 2.63 – 2.51 (m, 1H), 2.49 – 2.32 (m, 1H), 2.35



– 2.22 (m, 1H), 2.20 – 1.99 (m, 2H), 1.98 – 1.84 (m, 2H), 1.84 – 1.72 (m, 3H), 1.73 – 1.62 (m, 2H), 1.62 – 1.48 (m, 3H), 1.48 – 1.39 (m, 1H), 1.37 – 1.18 (m, 12H), 1.13 – 0.94 (m, 2H), 0.86 (s, 6H), 0.77 – 0.67 (m, 1H).

**<sup>13</sup>C NMR (101 MHz, CDCl<sub>3</sub>)** δ 221.1, 168.5 (d, *J* = 4.9 Hz), 140.5, 128.5, 128.4, 126.2, 74.6, 62.6 (d, *J* = 6.3 Hz), 62.5 (d, *J* = 2.8 Hz), 62.5 (d, *J* = 2.7 Hz), 54.2, 51.3, 47.7, 45.8 (d, *J* = 2.4 Hz), 44.6 (d, *J* = 3.4 Hz), 44.5, 36.6 (d, *J* = 3.1 Hz), 35.8, 35.6, 35.0, 34.2 (d, *J* = 14.6 Hz), 33.7 (d, *J* = 21.4 Hz), 31.5, 30.7, 28.7 (d, *J* = 3.7 Hz), 28.2 (d, *J* = 3.0 Hz), 27.3, 27.2, 21.7, 20.4, 16.3 (d, *J* = 5.9 Hz), 13.8, 12.2.

**<sup>31</sup>P NMR (162 MHz, CDCl<sub>3</sub>)** δ 22.79.

**HRMS (ESI-TOF) m/z:** [M+H]<sup>+</sup> calcd for C<sub>33</sub>H<sub>50</sub>O<sub>6</sub>P<sup>+</sup> 573.3340; Found: 573.3348.

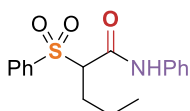

#### ***N*-Phenyl-2-(phenylsulfonyl)pentanamide (7a)**

This reaction was conducted on a 0.2 mmol scale with the general procedure. The crude product was purified by silica gel chromatography (PE/EA = 2:1) to afford the title compound as a colorless liquid (49.5 mg, 78% yield). The identity of the product was confirmed by <sup>1</sup>H NMR, <sup>13</sup>C NMR and HRMS.

**<sup>1</sup>H NMR (400 MHz, CDCl<sub>3</sub>)** δ 8.53 (s, 1H), 7.88 (d, *J* = 7.1 Hz, 2H), 7.66 (t, *J* = 7.5 Hz, 1H), 7.60 – 7.44 (m, 4H), 7.46 – 7.21 (m, 2H), 7.13 (t, *J* = 7.4 Hz, 1H), 5.39 – 3.60 (m, 1H), 2.57 – 1.86 (m, 2H), 1.59 – 1.30 (m, 2H), 0.93 (t, *J* = 7.3 Hz, 3H).

**<sup>13</sup>C NMR (101 MHz, CDCl<sub>3</sub>)** δ 162.2, 137.2, 136.2, 134.4, 129.2, 129.1, 129.0, 124.9, 120.1, 72.1, 28.7, 20.2, 13.6.

**HRMS (ESI-TOF) m/z:** [M+H]<sup>+</sup> calcd for C<sub>17</sub>H<sub>20</sub>NO<sub>3</sub>S<sup>+</sup> 318.1158; Found: 318.1159.

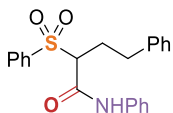

#### ***N*,4-Diphenyl-2-(phenylsulfonyl)butanamide (7b)**

This reaction was conducted on a 0.2 mmol scale with the general procedure. The crude product was purified by silica gel chromatography (PE/EA = 2:1) to afford the title compound as a colorless liquid (45.5 mg, 60% yield). The identity of the product was confirmed by <sup>1</sup>H NMR, <sup>13</sup>C NMR and HRMS.

**<sup>1</sup>H NMR (400 MHz, CDCl<sub>3</sub>)** δ 8.33 (s, 1H), 7.82 (d, *J* = 7.1 Hz, 2H), 7.66 (t, *J* = 7.5 Hz, 1H), 7.60 – 7.42 (m, 4H), 7.39 – 7.30 (m, 2H), 7.30 – 7.22 (m, 2H), 7.22 – 7.10 (m, 4H), 4.07 – 3.70 (m, 1H), 3.06 – 2.77 (m, 1H), 2.75 – 2.58 (m, 1H), 2.51 – 2.25 (m, 2H).

**<sup>13</sup>C NMR (101 MHz, CDCl<sub>3</sub>)** δ 161.7, 139.5, 137.1, 136.0, 134.5, 129.2, 129.1, 129.1, 128.6, 128.5, 126.5, 125.1, 120.1, 71.2, 32.7, 28.2.

**HRMS (ESI-TOF) m/z:** [M+H]<sup>+</sup> calcd for C<sub>22</sub>H<sub>22</sub>NO<sub>3</sub>S<sup>+</sup> 380.1315; Found: 380.1318.



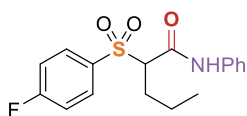

### 2-((4-Fluorophenyl)sulfonyl)-N-phenylpentanamide (7c)

This reaction was conducted on a 0.2 mmol scale with the general procedure. The crude product was purified by silica gel chromatography (PE/EA = 2:1) to afford the title compound as a colorless liquid (46.9 mg, 70% yield). The identity of the product was confirmed by  $^1\text{H}$  NMR,  $^{13}\text{C}$  NMR,  $^{19}\text{F}$  NMR and HRMS.

$^1\text{H}$  NMR (400 MHz,  $\text{CDCl}_3$ )  $\delta$  8.42 (s, 1H), 8.21 – 7.75 (m, 2H), 7.50 (d,  $J = 7.4$  Hz, 2H), 7.32 (t,  $J = 7.9$  Hz, 2H), 7.21 (t,  $J = 8.5$  Hz, 2H), 7.15 (t,  $J = 7.5$  Hz, 1H), 4.12 – 3.80 (m, 1H), 2.16 – 1.86 (m, 2H), 1.59 – 1.31 (m, 2H), 0.94 (t,  $J = 7.4$  Hz, 3H).

$^{13}\text{C}$  NMR (101 MHz,  $\text{CDCl}_3$ )  $\delta$  166.4 (d,  $J = 257.8$  Hz), 162.2, 137.2, 132.2 (d,  $J = 9.8$  Hz), 129.1, 125.2, 120.1, 116.7 (d,  $J = 22.8$  Hz), 72.3, 28.9, 20.3, 13.6.

$^{19}\text{F}$  NMR (376 MHz,  $\text{CDCl}_3$ )  $\delta$  -101.85.

HRMS (ESI-TOF)  $m/z$ :  $[\text{M}+\text{H}]^+$  calcd for  $\text{C}_{19}\text{H}_{19}\text{FNO}_3\text{S}^+$  336.1064; Found: 336.1069.

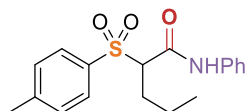

### N-Phenyl-2-tosylpentanamide (7d)

This reaction was conducted on a 0.2 mmol scale with the general procedure. The crude product was purified by silica gel chromatography (PE/EA = 2:1) to afford the title compound as a colorless liquid (52.3 mg, 79% yield). The identity of the product was confirmed by  $^1\text{H}$  NMR,  $^{13}\text{C}$  NMR and HRMS.

$^1\text{H}$  NMR (400 MHz,  $\text{CDCl}_3$ )  $\delta$  8.50 (s, 1H), 7.74 (d,  $J = 8.3$  Hz, 2H), 7.50 (d,  $J = 7.4$  Hz, 2H), 7.41 – 7.22 (m, 4H), 7.13 (t,  $J = 7.4$  Hz, 1H), 4.90 – 3.60 (m, 1H), 2.42 (s, 3H), 2.22 – 1.85 (m, 2H), 1.70 – 1.28 (m, 2H), 0.93 (t,  $J = 7.3$  Hz, 3H).

$^{13}\text{C}$  NMR (101 MHz,  $\text{CDCl}_3$ )  $\delta$  162.4, 145.6, 137.3, 133.2, 129.9, 129.1, 129.0, 124.9, 120.1, 72.1, 28.7, 21.7, 20.3, 13.6.

HRMS (ESI-TOF)  $m/z$ :  $[\text{M}+\text{H}]^+$  calcd for  $\text{C}_{18}\text{H}_{22}\text{NO}_3\text{S}^+$  332.1315; Found: 332.1322.

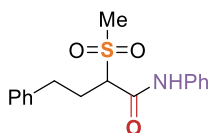

### 2-(Methylsulfonyl)-N,4-diphenylbutanamide (7e)

This reaction was conducted on a 0.2 mmol scale with the general procedure. The crude product was purified by silica gel chromatography (PE/EA = 2:1) to afford the title compound as a colorless liquid (39.3 mg, 62% yield). The identity of the product was confirmed by  $^1\text{H}$  NMR,  $^{13}\text{C}$  NMR and HRMS.

$^1\text{H}$  NMR (400 MHz,  $\text{CDCl}_3$ )  $\delta$  8.33 (s, 1H), 7.52 (d,  $J = 7.5$  Hz, 2H), 7.44 – 7.25 (m, 4H), 7.24 – 7.07 (m, 4H), 3.90 – 3.57 (m, 1H), 2.98 (s, 3H), 2.94 – 2.79 (m, 1H), 2.75 – 2.61 (m, 1H), 2.58 – 2.36 (m, 2H).

$^{13}\text{C}$  NMR (101 MHz,  $\text{CDCl}_3$ )  $\delta$  162.9, 139.3, 137.1, 129.1, 128.8, 128.6, 126.7, 125.3, 120.3, 70.5, 37.8, 32.9, 28.7.

HRMS (ESI-TOF)  $m/z$ :  $[\text{M}+\text{H}]^+$  calcd for  $\text{C}_{17}\text{H}_{20}\text{NO}_3\text{S}^+$  318.1158; Found: 318.1161.

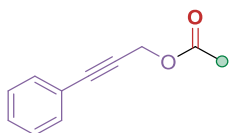

### 3-Phenylprop-2-yn-1-yl acetate (7f)<sup>10</sup>

This reaction was conducted on a 0.2 mmol scale with the general procedure. The crude product was purified by silica gel chromatography (PE/EA = 10:1) to afford the title compound as a colorless liquid (27.1 mg, 78% yield). The identity of the product was confirmed by  $^1\text{H}$  NMR,  $^{13}\text{C}$  NMR and HRMS.

$^1\text{H}$  NMR (400 MHz,  $\text{CDCl}_3$ )  $\delta$  7.66 – 7.41 (m, 2H), 7.41 – 7.24 (m, 3H), 4.90 (s, 2H), 2.13 (s, 3H).

$^{13}\text{C}$  NMR (101 MHz,  $\text{CDCl}_3$ )  $\delta$  170.3, 131.9, 128.7, 128.3, 122.1, 86.4, 82.9, 52.8, 20.8.

HRMS (ESI-TOF)  $m/z$ :  $[\text{M}+\text{H}]^+$  calcd for  $\text{C}_{11}\text{H}_{11}\text{O}_2^+$  175.0754; Found: 175.0759.

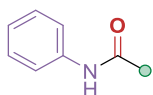

### N-Phenylacetamide (7g)<sup>11</sup>

This reaction was conducted on a 0.2 mmol scale with the general procedure. The crude product was purified by silica gel chromatography (PE/EA = 2:1) to afford the title compound as a colorless liquid (22.1 mg, 82% yield). The identity of the product was confirmed by  $^1\text{H}$  NMR,  $^{13}\text{C}$  NMR and HRMS.

$^1\text{H}$  NMR (400 MHz,  $\text{CDCl}_3$ )  $\delta$  8.18 (s, 1H), 7.50 (d,  $J = 7.3$  Hz, 2H), 7.27 (t,  $J = 7.9$  Hz, 2H), 7.08 (t,  $J = 7.4$  Hz, 1H), 2.13 (s, 3H).

$^{13}\text{C}$  NMR (101 MHz,  $\text{CDCl}_3$ )  $\delta$  169.0, 138.0, 128.8, 124.2, 120.1, 24.3.

HRMS (ESI-TOF)  $m/z$ :  $[\text{M}+\text{H}]^+$  calcd for  $\text{C}_8\text{H}_{10}\text{NO}_2^+$  136.0757; Found: 136.0758.

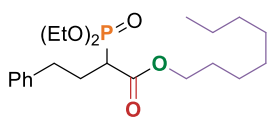

### Octyl 2-(diethoxyphosphoryl)-4-phenylbutanoate (8a)

This reaction was conducted on a 0.2 mmol scale with the general procedure. The crude product was purified by silica gel chromatography (PE/EA = 2:1) to afford the title compound as a colorless liquid (47.8 mg, 58% yield). The identity of the product was confirmed by  $^1\text{H}$  NMR,  $^{13}\text{C}$  NMR,  $^{31}\text{P}$  NMR and HRMS.

$^1\text{H}$  NMR (400 MHz,  $\text{CDCl}_3$ )  $\delta$  7.32 – 7.24 (m, 2H), 7.24 – 7.13 (m, 3H), 4.19 – 4.04 (m, 6H), 3.09 – 2.88 (m, 1H), 2.85 – 2.67 (m, 1H), 2.64 – 2.51 (m, 1H), 2.41 – 2.25 (m, 1H), 2.23 – 2.07 (m, 1H), 1.72 – 1.60 (m, 2H), 1.40 – 1.25 (m, 16H), 0.87 (t,  $J = 6.9$  Hz, 3H).

$^{13}\text{C}$  NMR (101 MHz,  $\text{CDCl}_3$ )  $\delta$  169.1 (d,  $J = 5.0$  Hz), 140.4, 128.5, 128.4, 126.2, 65.6, 62.7 (d,  $J = 13.0$  Hz), 62.7, 45.1 (d,  $J = 130.9$  Hz), 34.3 (d,  $J = 15.4$  Hz), 31.8, 29.2, 28.6 (d,  $J = 4.5$  Hz), 28.6, 25.8, 22.6, 16.4 (d,  $J = 1.9$  Hz), 16.3 (d,  $J = 2.1$  Hz), 14.1.

**<sup>31</sup>P NMR (162 MHz, CDCl<sub>3</sub>)** δ 22.67.

**HRMS (ESI-TOF) m/z:** [M+H]<sup>+</sup> calcd for C<sub>22</sub>H<sub>38</sub>O<sub>5</sub>P<sup>+</sup> 413.2451; Found: 413.2458.

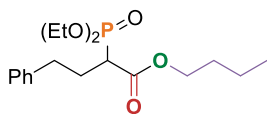

### Butyl 2-(diethoxyphosphoryl)-4-phenylbutanoate (8b)

This reaction was conducted on a 0.2 mmol scale with the general procedure. The crude product was purified by silica gel chromatography (PE/EA = 2:1) to afford the title compound as a colorless liquid (37.7 mg, 53% yield). The identity of the product was confirmed by <sup>1</sup>H NMR, <sup>13</sup>C NMR, <sup>31</sup>P NMR and HRMS.

**<sup>1</sup>H NMR (400 MHz, CDCl<sub>3</sub>)** δ 7.28 (t, *J* = 7.6 Hz, 2H), 7.20 (t, *J* = 7.4 Hz, 1H), 7.17 (d, *J* = 7.0 Hz, 2H), 4.26 – 3.99 (m, 6H), 3.16 – 2.87 (m, 1H), 2.81 – 2.69 (m, 1H), 2.66 – 2.54 (m, 1H), 2.45 – 2.26 (m, 1H), 2.23 – 2.07 (m, 1H), 1.81 – 1.59 (m, 2H), 1.47 – 1.37 (m, 2H), 1.31 – 1.23 (m, 6H), 0.95 (t, *J* = 7.4 Hz, 3H).

**<sup>13</sup>C NMR (101 MHz, CDCl<sub>3</sub>)** δ 169.1 (d, *J* = 4.9 Hz), 140.4, 128.5, 128.4, 126.2, 65.2, 62.6 (d, *J* = 6.4 Hz), 62.6 (d, *J* = 7.0 Hz), 45.0 (d, *J* = 130.9 Hz), 34.3 (d, *J* = 15.4 Hz), 30.5, 28.6 (d, *J* = 4.5 Hz), 19.0, 16.3 (d, *J* = 3.7 Hz), 16.3 (d, *J* = 3.9 Hz), 13.6.

**<sup>31</sup>P NMR (162 MHz, CDCl<sub>3</sub>)** δ 22.65.

**HRMS (ESI-TOF) m/z:** [M+H]<sup>+</sup> calcd for C<sub>18</sub>H<sub>30</sub>O<sub>5</sub>P<sup>+</sup> 357.1825; Found: 357.1826.

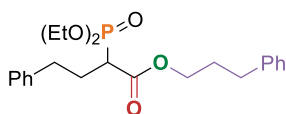

### 3-Phenylpropyl 2-(diethoxyphosphoryl)-4-phenylbutanoate (8c)

This reaction was conducted on a 0.2 mmol scale with the general procedure. The crude product was purified by silica gel chromatography (PE/EA = 2:1) to afford the title compound as a colorless liquid (50.2 mg, 60% yield). The identity of the product was confirmed by <sup>1</sup>H NMR, <sup>13</sup>C NMR, <sup>31</sup>P NMR and HRMS.

**<sup>1</sup>H NMR (400 MHz, CDCl<sub>3</sub>)** δ 7.41 – 7.25 (m, 4H), 7.24 – 7.00 (m, 6H), 4.33 – 3.94 (m, 6H), 3.02 – 2.94 (m, 1H), 2.80 – 2.66 (m, 3H), 2.65 – 2.50 (m, 1H), 2.46 – 2.27 (m, 1H), 2.24 – 2.09 (m, 1H), 2.09 – 1.94 (m, 2H), 1.51 – 1.15 (m, 6H).

**<sup>13</sup>C NMR (101 MHz, CDCl<sub>3</sub>)** δ 169.0 (d, *J* = 5.0 Hz), 141.0, 140.3, 128.5, 128.4, 128.4, 128.4, 126.2, 126.0, 64.6, 62.7 (d, *J* = 6.4 Hz), 62.6 (d, *J* = 6.6 Hz), 45.0 (d, *J* = 131.0 Hz), 34.3 (d, *J* = 15.4 Hz), 32.0, 30.2, 28.6 (d, *J* = 4.5 Hz), 16.3 (d, *J* = 6.1 Hz).

**<sup>31</sup>P NMR (162 MHz, CDCl<sub>3</sub>)** δ 22.63.

**HRMS (ESI-TOF) m/z:** [M+H]<sup>+</sup> calcd for C<sub>23</sub>H<sub>32</sub>O<sub>5</sub>P<sup>+</sup> 419.1928; Found: 419.1933.

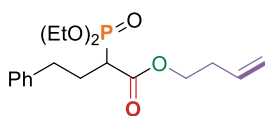

### But-3-en-1-yl 2-(diethoxyphosphoryl)-4-phenylbutanoate (8d)

This reaction was conducted on a 0.2 mmol scale with the general procedure. The crude product was purified by silica gel chromatography (PE/EA = 2:1) to afford the title compound as a colorless liquid (22.7 mg, 32% yield). The identity of the product was confirmed by  $^1\text{H}$  NMR,  $^{13}\text{C}$  NMR,  $^{31}\text{P}$  NMR and HRMS.

$^1\text{H}$  NMR (400 MHz,  $\text{CDCl}_3$ )  $\delta$  7.32 – 7.26 (m, 2H), 7.24 – 7.14 (m, 3H), 5.95 – 5.59 (m, 1H), 5.31 – 4.77 (m, 2H), 4.29 – 4.18 (m, 2H), 4.18 – 4.03 (m, 4H), 3.03 – 2.89 (m, 1H), 2.81 – 2.67 (m, 1H), 2.64 – 2.52 (m, 1H), 2.48 – 2.40 (m, 2H), 2.35 – 2.23 (m, 1H), 2.22 – 2.06 (m, 1H), 1.47 – 1.23 (m, 6H).

$^{13}\text{C}$  NMR (101 MHz,  $\text{CDCl}_3$ )  $\delta$  169.0 (d,  $J = 4.9$  Hz), 140.4, 133.8, 128.5, 128.4, 126.2, 117.4, 64.5, 62.7 (d,  $J = 6.3$  Hz), 62.6 (d,  $J = 6.9$  Hz), 45.0 (d,  $J = 131.0$  Hz), 34.3 (d,  $J = 15.3$  Hz), 32.9, 28.6 (d,  $J = 4.7$  Hz), 16.3 (d,  $J = 6.0$  Hz).

$^{31}\text{P}$  NMR (162 MHz,  $\text{CDCl}_3$ )  $\delta$  22.46.

HRMS (ESI-TOF)  $m/z$ :  $[\text{M}+\text{H}]^+$  calcd for  $\text{C}_{18}\text{H}_{28}\text{O}_5\text{P}^+$  355.1669; Found: 355.1670.

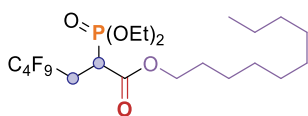

### Decyl 2-(diethoxyphosphoryl)-4,4,5,5,6,6,7,7-nonafluoroheptanoate (9a)

This reaction was conducted on a 0.2 mmol scale with the general procedure. The crude product was purified by silica gel chromatography (PE/EA = 2:1) to afford the title compound as a colorless liquid (71.6 mg, 63% yield). The identity of the product was confirmed by  $^1\text{H}$  NMR,  $^{13}\text{C}$  NMR,  $^{31}\text{P}$  NMR,  $^{19}\text{F}$  NMR and HRMS.

$^1\text{H}$  NMR (400 MHz,  $\text{CDCl}_3$ )  $\delta$  4.30 – 3.98 (m, 6H), 3.48 – 3.22 (m, 1H), 3.12 – 2.79 (m, 1H), 2.76 – 2.42 (m, 1H), 1.77 – 1.57 (m, 2H), 1.42 – 1.20 (m, 20H), 0.87 (t,  $J = 6.7$  Hz, 3H).

$^{13}\text{C}$  NMR (176 MHz,  $\text{CDCl}_3$ )  $\delta$  167.6 (d,  $J = 6.3$  Hz), 66.4, 63.6 (d,  $J = 6.4$  Hz), 63.3 (d,  $J = 6.9$  Hz), 38.1 (d,  $J = 131.8$  Hz), 31.8, 29.5 (d,  $J = 3.3$  Hz), 29.3, 29.2, 28.8 (t,  $J = 21.5$  Hz), 28.4, 25.7, 22.6, 16.3 (d,  $J = 5.9$  Hz), 14.1.

$^{31}\text{P}$  NMR (162 MHz,  $\text{CDCl}_3$ )  $\delta$  19.95.

$^{19}\text{F}$  NMR (176 MHz,  $\text{CDCl}_3$ )  $\delta$  -80.53 – -81.71 (m, 3F), -112.58 – -116.50 (m, 2F), -121.97 – -125.15 (m, 2F), -125.15 – -127.65 (m, 2F).

HRMS (ESI-TOF)  $m/z$ :  $[\text{M}+\text{H}]^+$  calcd for  $\text{C}_{21}\text{H}_{35}\text{F}_9\text{O}_5\text{P}^+$  569.2073; Found: 569.2069.

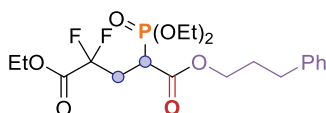

### 1-Ethyl 5-(3-phenylpropyl) 4-(diethoxyphosphoryl)-2,2-difluoropentanedioate (9b)

This reaction was conducted on a 0.2 mmol scale with the general procedure. The crude product was purified by silica gel chromatography (PE/EA = 2:1) to afford the title compound as a colorless liquid

(43.2 mg, 48% yield). The identity of the product was confirmed by  $^1\text{H}$  NMR,  $^{13}\text{C}$  NMR,  $^{31}\text{P}$  NMR,  $^{19}\text{F}$  NMR and HRMS.

**$^1\text{H}$  NMR (400 MHz,  $\text{CDCl}_3$ )**  $\delta$  7.42 – 7.24 (m, 2H), 7.24 – 7.04 (m, 3H), 4.52 – 4.25 (m, 2H), 4.24 – 3.99 (m, 6H), 3.51 – 3.16 (m, 1H), 3.07 – 2.81 (m, 1H), 2.90 – 2.66 (m, 2H), 2.67 – 2.49 (m, 1H), 2.23 – 1.81 (m, 2H), 1.56 – 1.13 (m, 9H).

**$^{13}\text{C}$  NMR (101 MHz,  $\text{CDCl}_3$ )**  $\delta$  168.0 (d,  $J = 5.9$  Hz), 163.3 (t,  $J = 32.2$  Hz), 141.1, 128.5, 128.4, 126.0, 114.6 (d,  $J = 16.8$  Hz), 65.3, 63.5 (d,  $J = 6.5$  Hz), 63.3, 63.2 (d,  $J = 6.8$  Hz), 62.6 (d,  $J = 5.8$  Hz), 39.0 (d,  $J = 131.6$  Hz), 32.1 (d,  $J = 3.8$  Hz), 31.9, 30.1, 16.3 (d,  $J = 5.4$  Hz), 13.9.

**$^{31}\text{P}$  NMR (162 MHz,  $\text{CDCl}_3$ )**  $\delta$  20.57.

**$^{19}\text{F}$  NMR (176 MHz,  $\text{CDCl}_3$ )**  $\delta$  -95.15 – -118.30 (m, 2F)

**HRMS (ESI-TOF) m/z:**  $[\text{M}+\text{H}]^+$  calcd for  $\text{C}_{20}\text{H}_{30}\text{F}_2\text{O}_7\text{P}^+$  451.1692; Found: 451.1699.

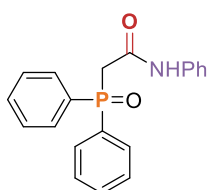

### 2-(Diphenylphosphoryl)-*N*-phenylacetamide (5s)

This reaction was conducted on a 0.2 mmol scale with the general procedure. The crude product was purified by silica gel chromatography (PE/EA = 2:1) to afford the title compound as a colorless liquid (54.3 mg, 81% yield). The identity of the product was confirmed by  $^1\text{H}$  NMR,  $^{13}\text{C}$  NMR,  $^{31}\text{P}$  NMR and HRMS.

**$^1\text{H}$  NMR (400 MHz,  $\text{CDCl}_3$ )**  $\delta$  9.75 (s, 1H), 7.82 – 7.68 (m, 4H), 7.62 – 7.40 (m, 8H), 7.21 (t,  $J = 7.9$  Hz, 2H), 7.02 (t,  $J = 7.4$  Hz, 1H), 3.53 (d,  $J = 12.7$  Hz, 2H).

**$^{13}\text{C}$  NMR (101 MHz,  $\text{CDCl}_3$ )**  $\delta$  167.5 (d,  $J = 8.6$  Hz), 137.7, 136.8 (d,  $J = 13.0$  Hz), 132.7 (d,  $J = 19.4$  Hz), 130.7 (d,  $J = 10.1$  Hz), 128.9 (d,  $J = 2.9$  Hz), 128.8, 124.3, 119.9, 38.7 (d,  $J = 22.0$  Hz).

**$^{31}\text{P}$  NMR (162 MHz,  $\text{CDCl}_3$ )**  $\delta$  30.13.

**HRMS (ESI-TOF) m/z:**  $[\text{M}+\text{H}]^+$  calcd for  $\text{C}_{20}\text{H}_{19}\text{NO}_2\text{P}^+$  336.1148; Found: 336.1150.

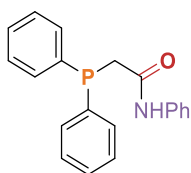

### 2-(Diphenylphosphanyl)-*N*-phenylacetamide (11)

This reaction was conducted on a 0.2 mmol scale with the general procedure. The crude product was purified by silica gel chromatography (PE/EA = 5:1) to afford the title compound as a colorless liquid (40.2 mg, 63% yield). The identity of the product was confirmed by  $^1\text{H}$  NMR,  $^{13}\text{C}$  NMR,  $^{31}\text{P}$  NMR and HRMS.

**$^1\text{H}$  NMR (400 MHz,  $\text{CDCl}_3$ )**  $\delta$  7.52 – 7.45 (m, 4H), 7.40 – 7.35 (m, 6H), 7.32 (d,  $J = 7.6$  Hz, 2H), 7.26 (t,  $J = 7.9$  Hz, 3H), 7.06 (t,  $J = 7.2$  Hz, 1H), 3.17 (s, 2H).

**$^{13}\text{C}$  NMR (101 MHz,  $\text{CDCl}_3$ )**  $\delta$  162.8 (d,  $J = 4.9$  Hz), 138.0, 132.6 (d,  $J = 2.7$  Hz), 131.3 (d,  $J = 103.6$  Hz), 130.8 (d,  $J = 10.0$  Hz), 129.0 (d,  $J = 12.3$  Hz), 128.8, 124.2, 120.1, 39.7 (d,  $J = 59.3$  Hz).

---

<sup>31</sup>P NMR (162 MHz, CDCl<sub>3</sub>) δ -17.08.

HRMS (ESI-TOF) m/z: [M+H]<sup>+</sup> calcd for C<sub>20</sub>H<sub>19</sub>NOP<sup>+</sup> 320.1199; Found: 320.1203.

## 10. References

- [1] J.-P. Fu, Y.-H. He, J. Zhong, Y. Yang, X. Deng and Z. J. Guan, An Efficient and General Route to the Synthesis of Diethyl  $\alpha,\alpha$ -Bromofluorophosphonates, *Fluor. Chem.* **2011**, *132*, 636–640.
- [2] S.-J. He, J.-W. Wang, Y. Li, Z.-Y. Xu, X.-X. Wang, X. Lu and Y. Fu, Nickel-Catalyzed Enantioconvergent Reductive Hydroalkylation of Olefins with  $\alpha$ -Heteroatom Phosphorus or Sulfur Alkyl Electrophiles, *J. Am. Chem. Soc.* **2020**, *142*, 214–221.
- [3] H. Wang, P. Zheng, X. Wu, Y. Li and T. XU, Modular and Facile Access to Chiral  $\alpha$ -Aryl Phosphates via Dual Nickel- and Photoredox-Catalyzed Reductive Cross-Coupling, *J. Am. Chem. Soc.* **2022**, *144*, 3989–3997.
- [4] L. Qi, X. Pang, K. Yin, Q.-Q. Pan, X.-X. Wei and X.-Z. Shu, Mn-Mediated Reductive C(sp<sup>3</sup>)–Si Coupling of Activated Secondary Alkyl Bromides with Chlorosilanes, *Chinese Chemical Letters* **2022**, *33*, 5061–5064.
- [5] Z.-P. Bao and X.-F. Wu, Palladium-Catalyzed Direct Carbonylation of Bromoacetonitrile to Synthesize 2-Cyano-*N*-acetamide and 2-Cyanoacetate Compounds, *Angew. Chem. Int. Ed.* **2023**, e202301671.
- [6] H.-J. Ai, B. N. Leidecker, P. Dam, C. Kubis, J. Rabeah and X.-F. Wu, Iron-Catalyzed Alkoxy carbonylation of Alkyl Bromides via a Two-Electron Transfer Process, *Angew. Chem. Int. Ed.* **2022**, *61*, e202211939.
- [7] B. T. Sargent and E. J. Alexanian, Palladium-Catalyzed Alkoxy carbonylation of Unactivated Secondary Alkyl Bromides at Low Pressure, *J. Am. Chem. Soc.* **2016**, *138*, 7520–7523.
- [8] F. Zhao, H.-J. Ai and X.-F. Wu, Copper-Catalyzed Substrate-Controlled Carbonylative Synthesis of  $\alpha$ -Keto Amides and Amides from Alkyl Halides, *Angew. Chem. Int. Ed.* **2022**, *61*, e202200062.
- [9] Y. Li, S. Das, S. Zhou, K. Junge and M. Beller, General and Selective Copper-Catalyzed Reduction of Tertiary and Secondary Phosphine Oxides: Convenient Synthesis of Phosphines, *J. Am. Chem. Soc.* **2012**, *134*, 9727–9732.
- [10] Y. Nishimoto, A. Okita, M. Yasuda and A. Baba, Synthesis of a Wide Range of Thioethers by Indium Triiodide Catalyzed Direct Coupling between Alkyl Acetates and Thiosilanes, *Org. Lett.* **2012**, *14*, 1846–1849.
- [11] Y. Gao, Y. Mao, B. Zhang, Y. Zhan and Y. Huo, Regioselective Nitration of Anilines with Fe(NO<sub>3</sub>)<sub>3</sub>·9H<sub>2</sub>O as A Promoter and A Nitro Source, *Org. Biomol. Chem.*, **2018**, *16*, 3881–3884.

## 11. Spectra Data for the Compounds

<sup>1</sup>H NMR CDCl<sub>3</sub> 400.13MHz

8.81, 7.54, 7.32, 7.30, 7.29, 7.28, 7.27, 7.26, 7.25, 7.20, 7.19, 7.06, 7.05, 4.17, 4.15, 4.15, 4.14, 4.13, 4.12, 4.11, 4.09, 4.09, 4.07, 4.07, 4.05, 4.04, 4.02, 4.02, 4.00, 4.00, 2.99, 2.98, 2.96, 2.97, 2.93, 2.93, 2.91, 2.91, 2.90, 2.89, 2.88, 2.87, 2.86, 2.84, 2.84, 2.67, 2.67, 2.66, 2.65, 2.64, 2.61, 2.61, 2.45, 2.44, 2.43, 2.42, 2.42, 2.42, 2.40, 2.14, 2.12, 2.12, 2.11, 2.11, 2.10, 2.10, 1.33, 1.32, 1.30, 1.29, 1.28, 1.26

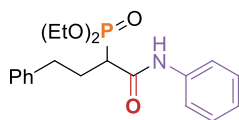

**3a**

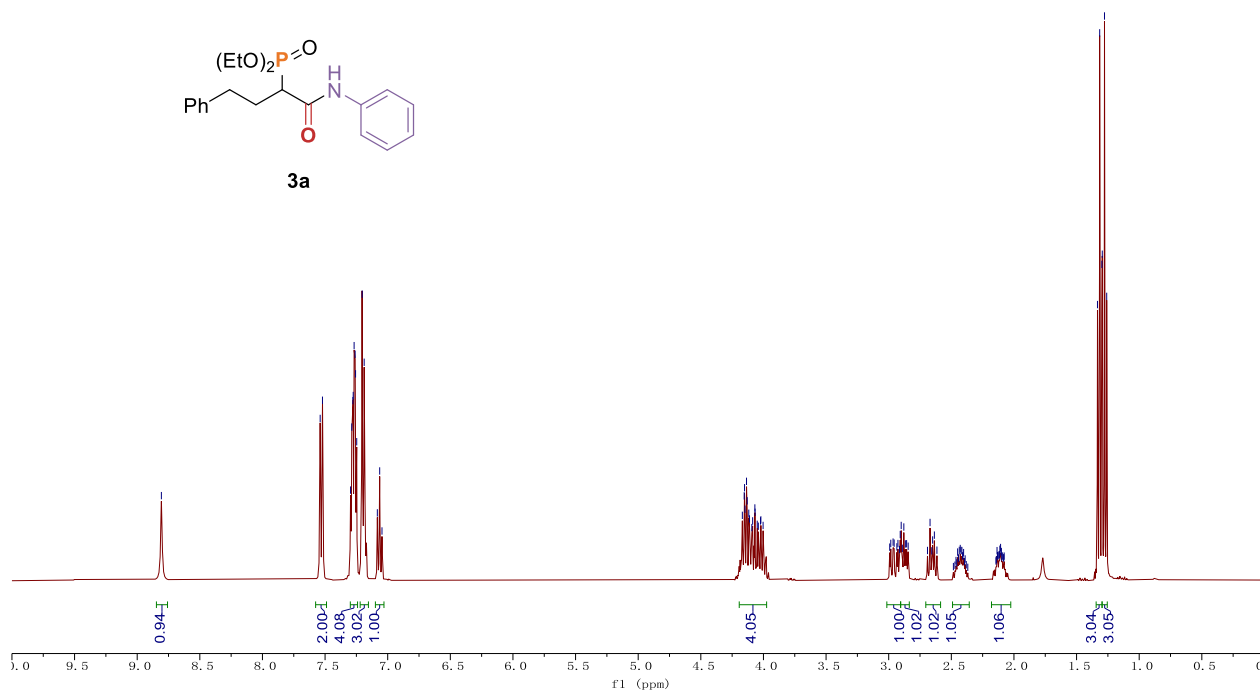

<sup>13</sup>C NMR CDCl<sub>3</sub> 100.62MHz

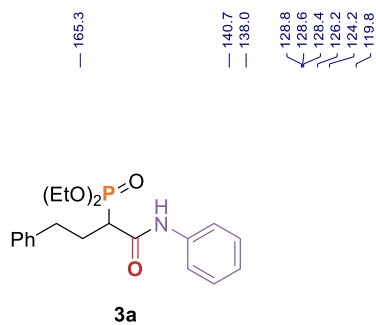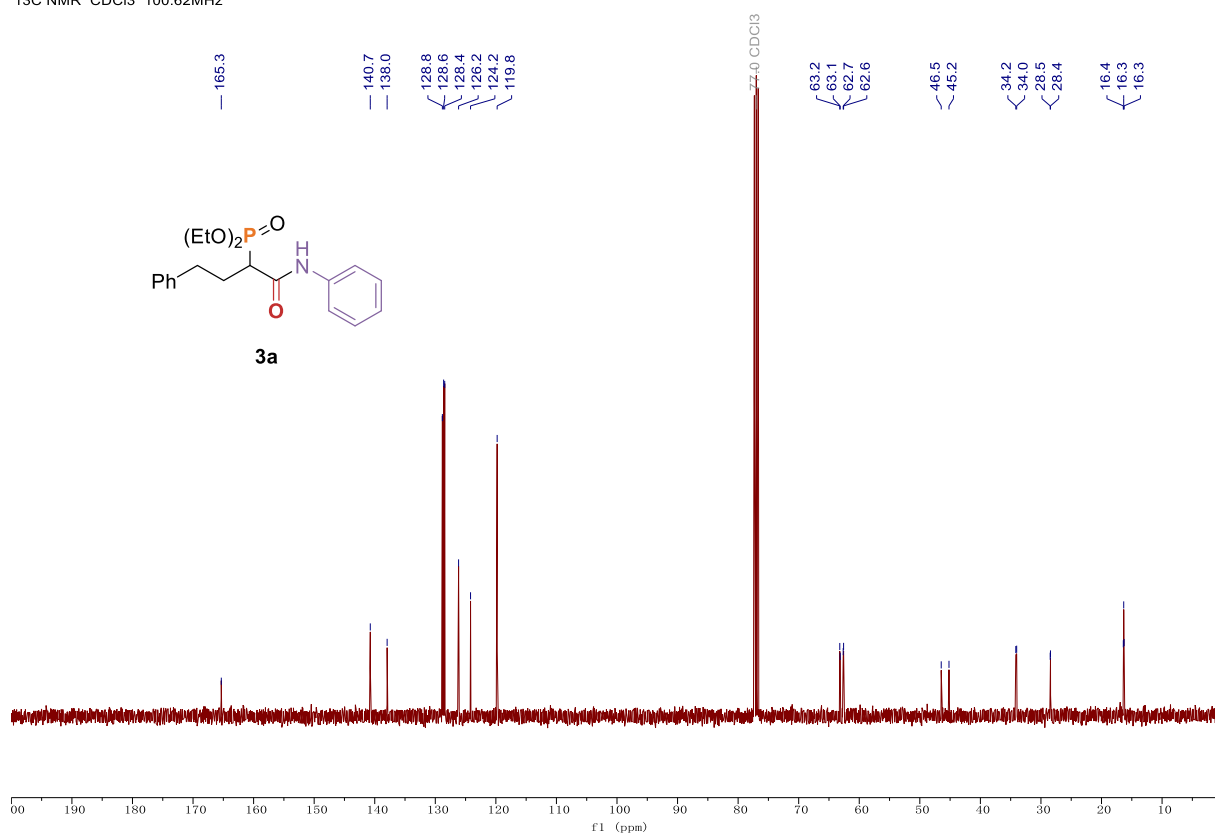

25.42

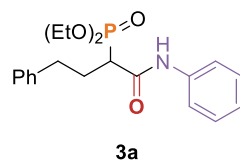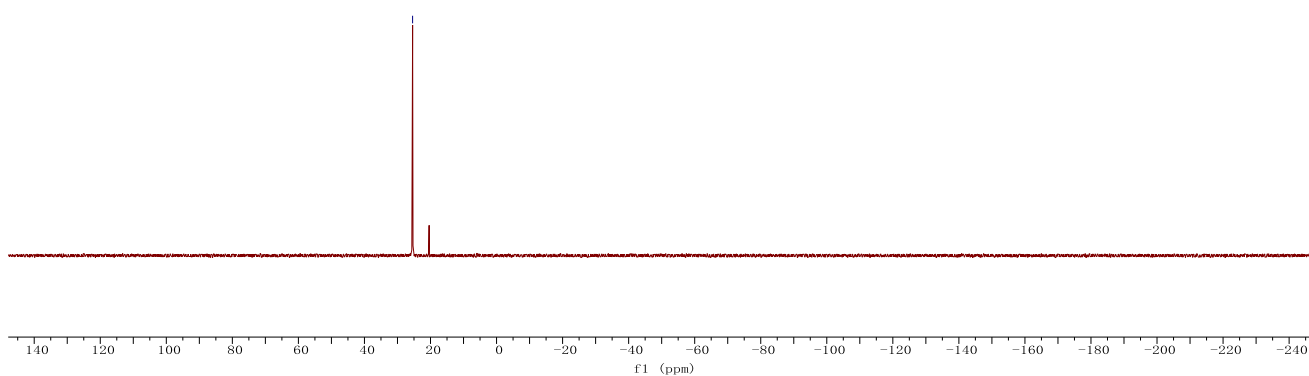



1H NMR CDCl3 400.13MHz

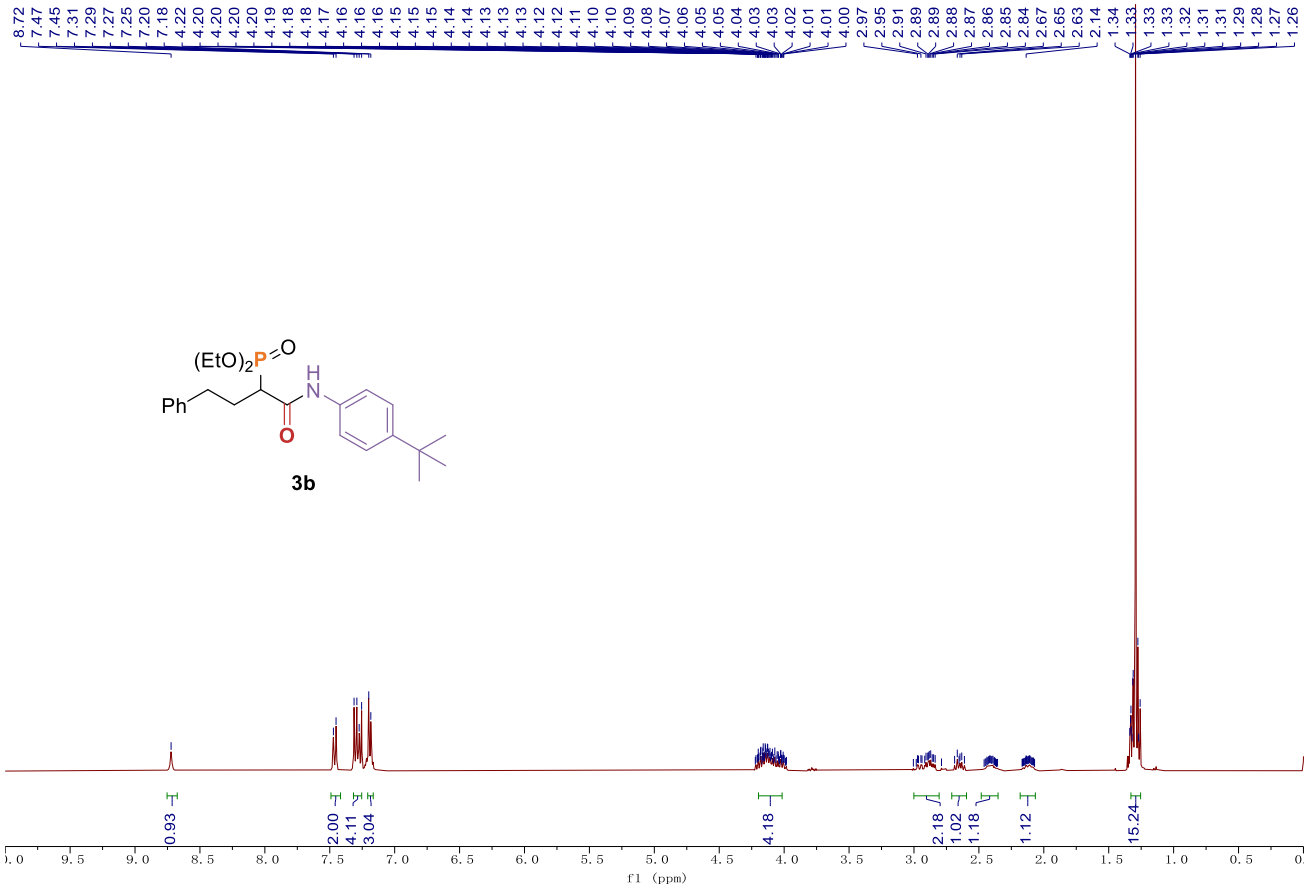

13C NMR CDCl3 100.62MHz

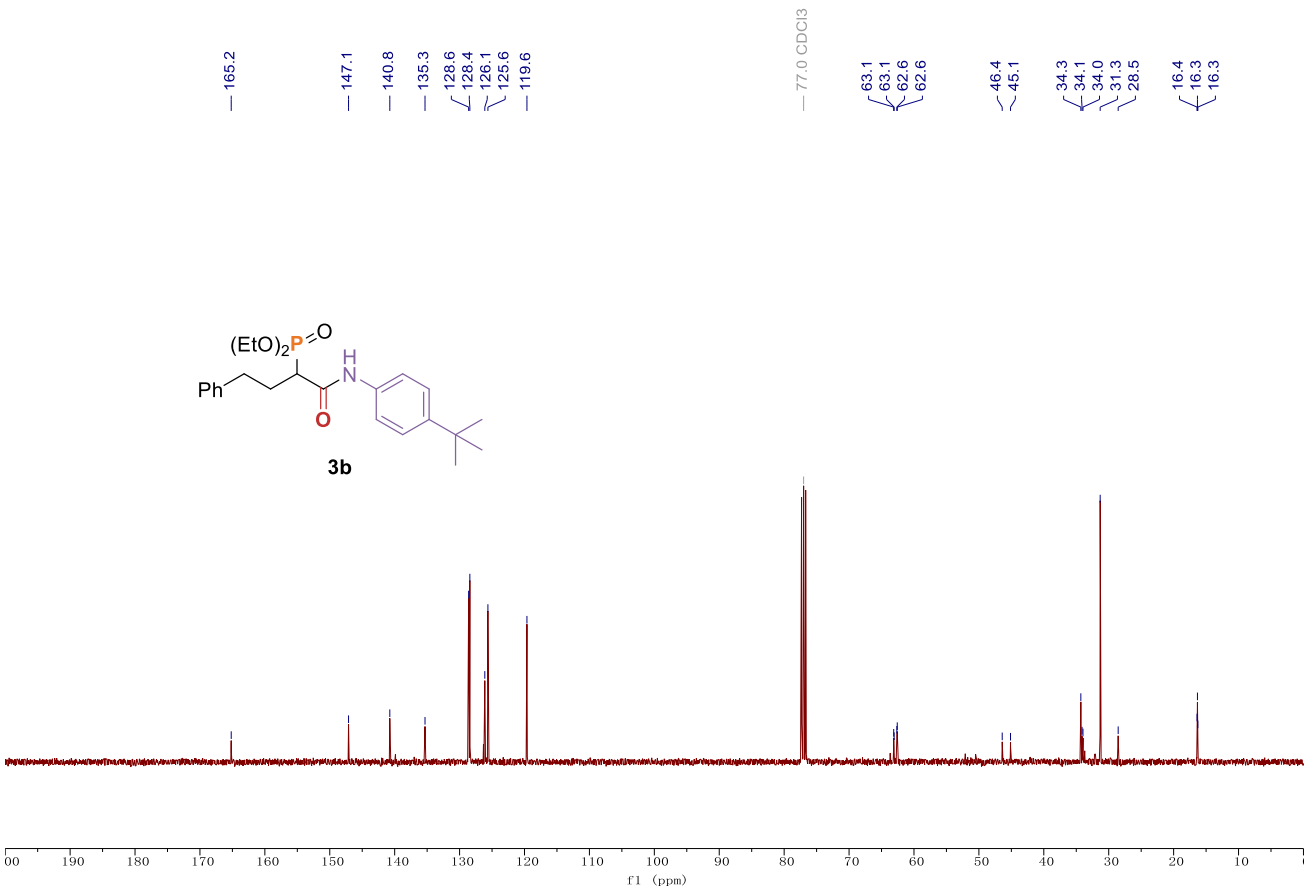

31P NMR CDCl3 161.97MHz

— 25.49

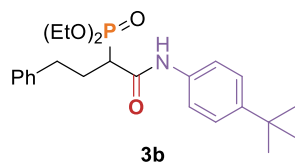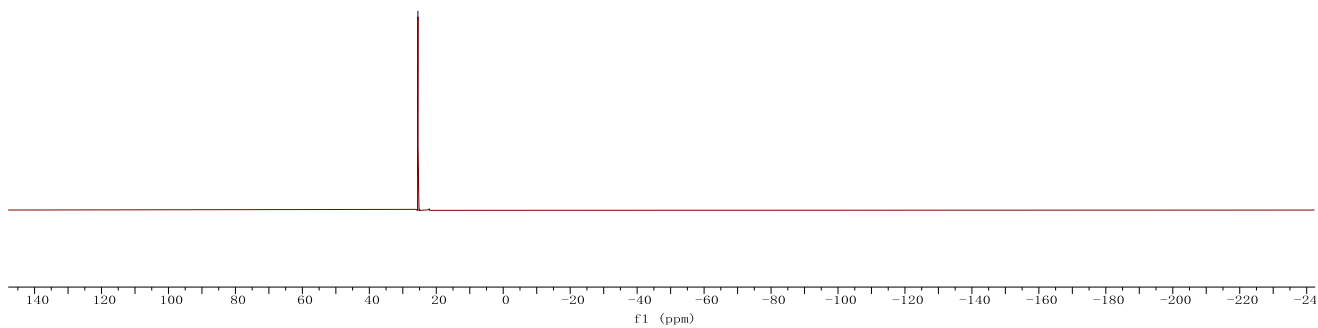

1H NMR CDCl3 400.13MHz

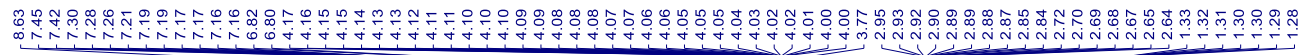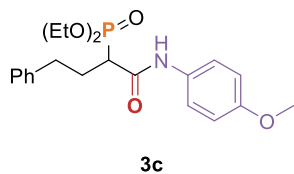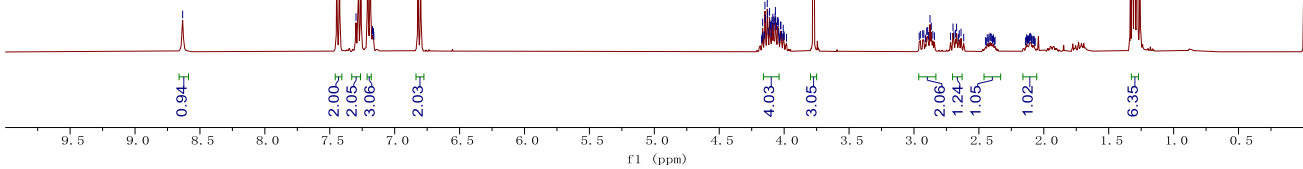

13C NMR CDCl3 100.62MHz

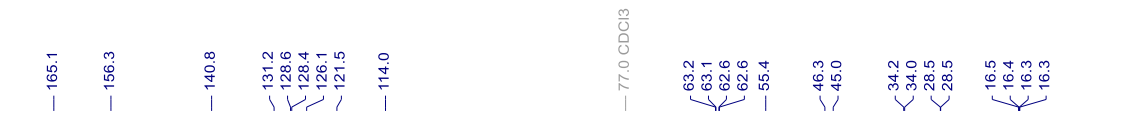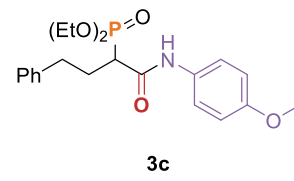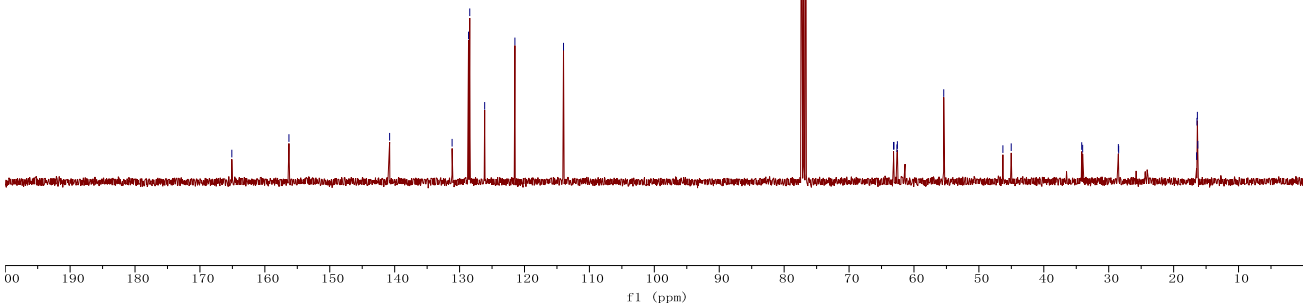

31P NMR CDCl3 161.97MHz

— 25.59

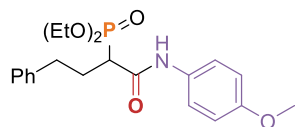

**3c**

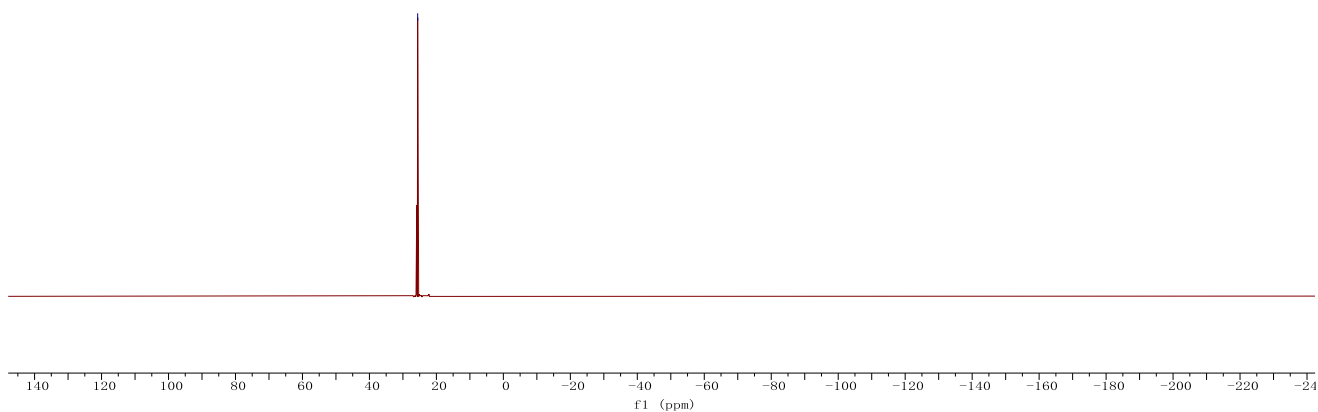

1H NMR CDCl3 400.13MHz

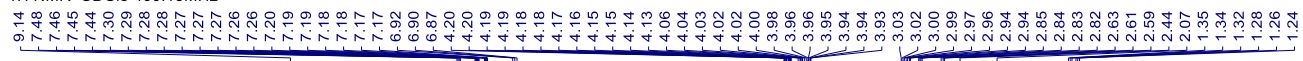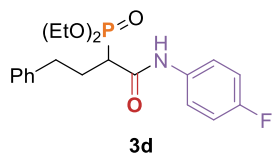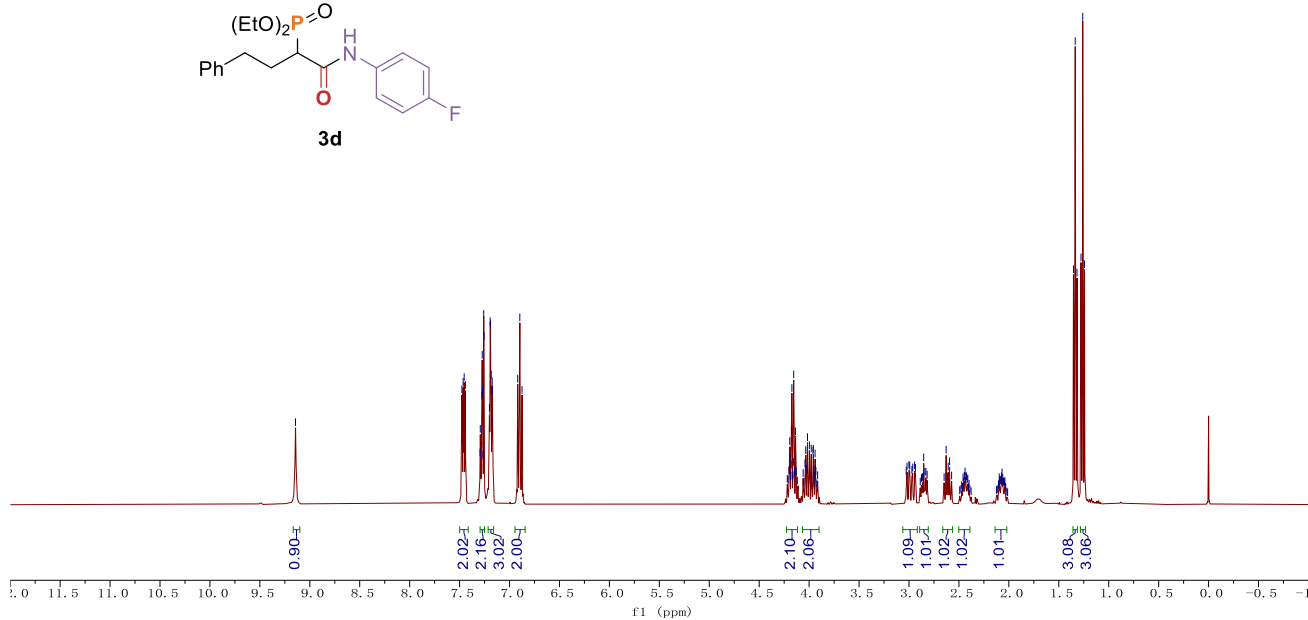

13C NMR CDCl3 100.62MHz

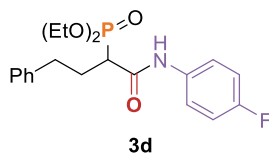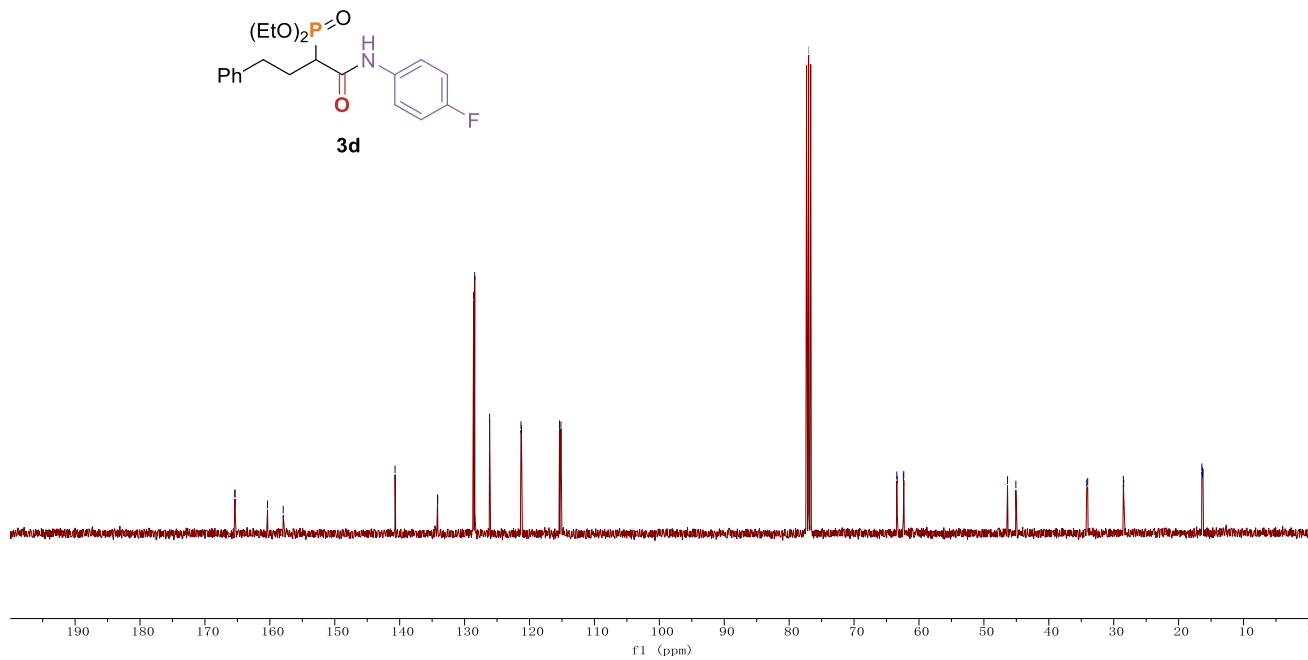

19F NMR CDCl3 376.46MHz

-118.54

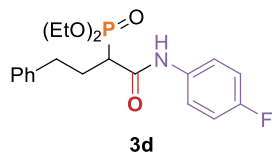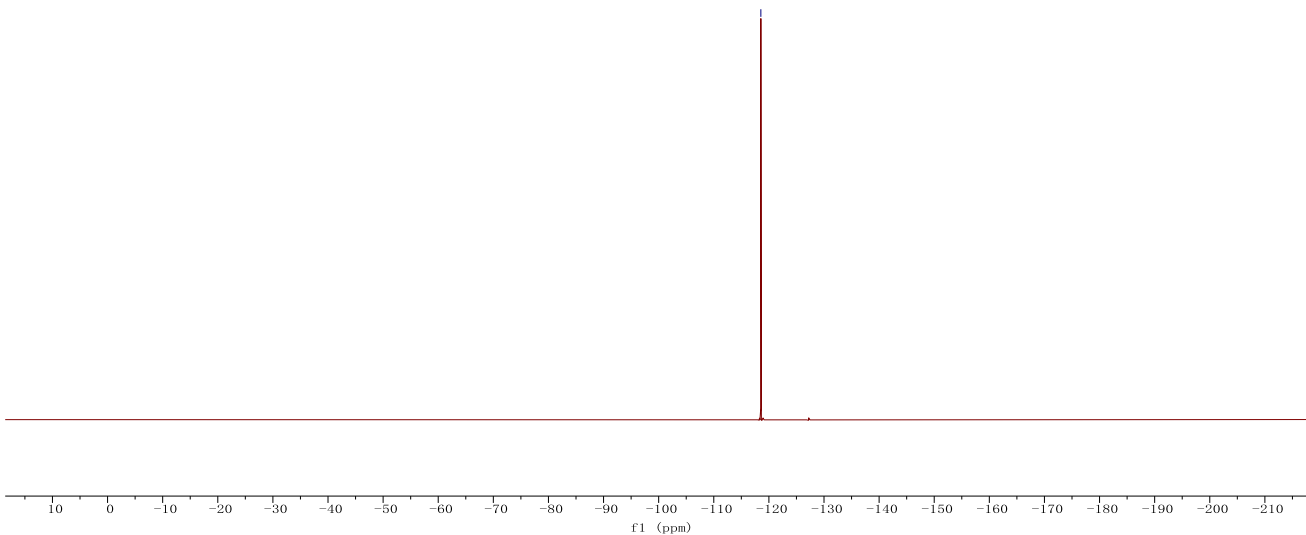

31P NMR CDCl3 161.97MHz

-25.33

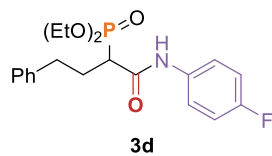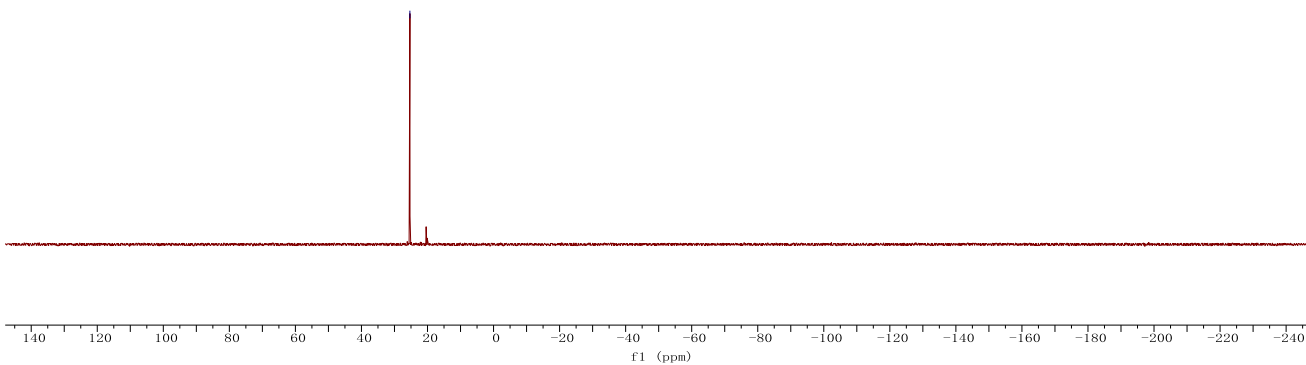

1H NMR CDCl3 400.13MHz

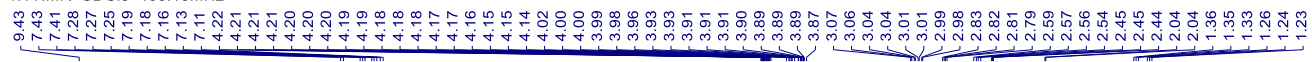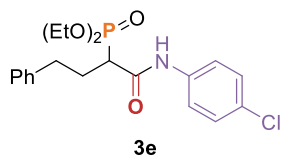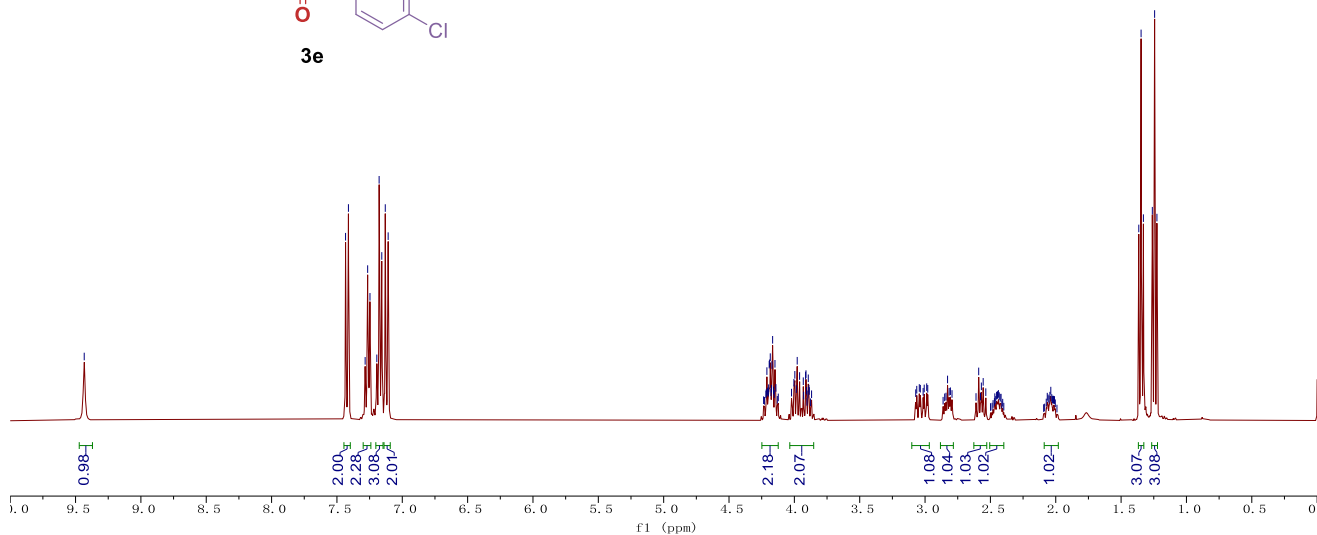

13C NMR CDCl3 100.62MHz

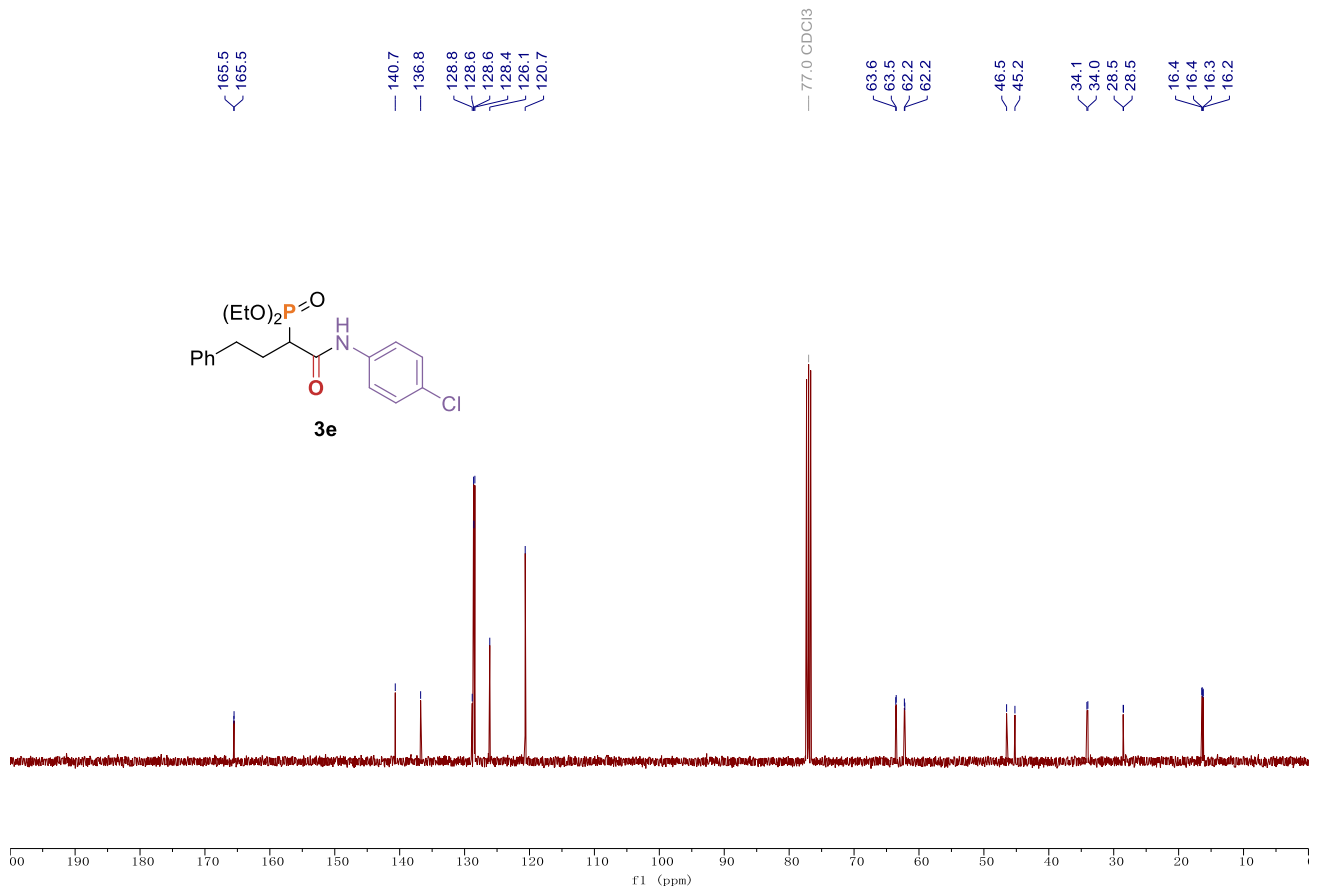

31P NMR CDCl3 161.97MHz

25.14

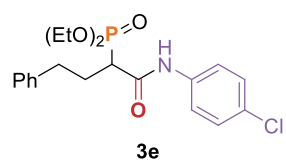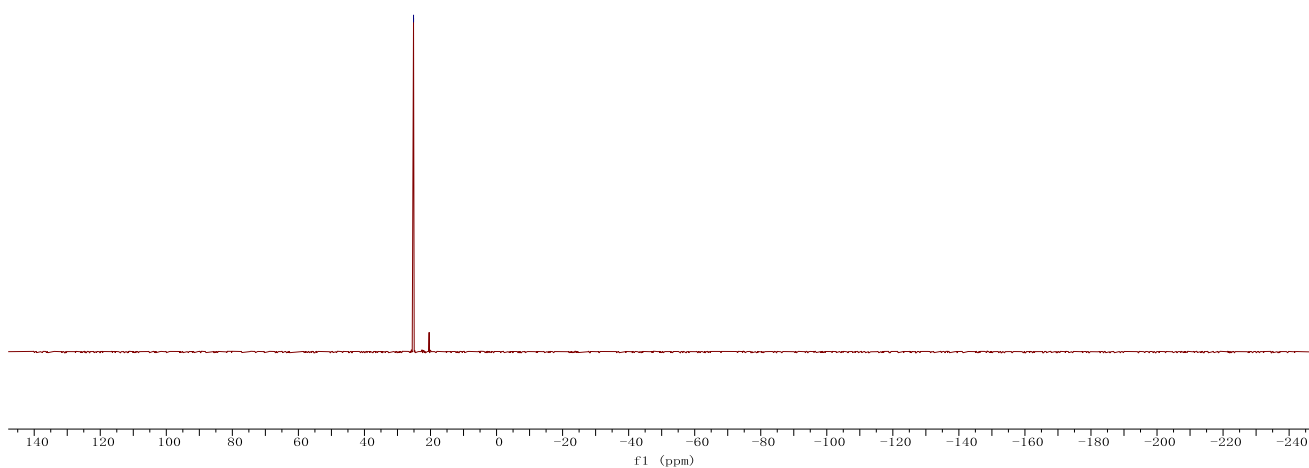



1H NMR CDCl3 400.13MHz

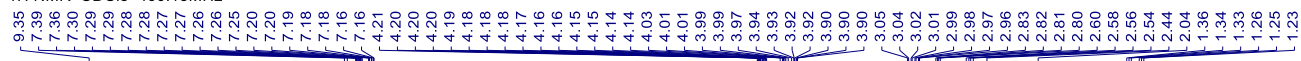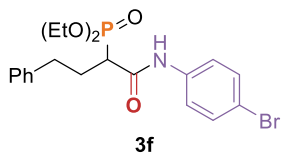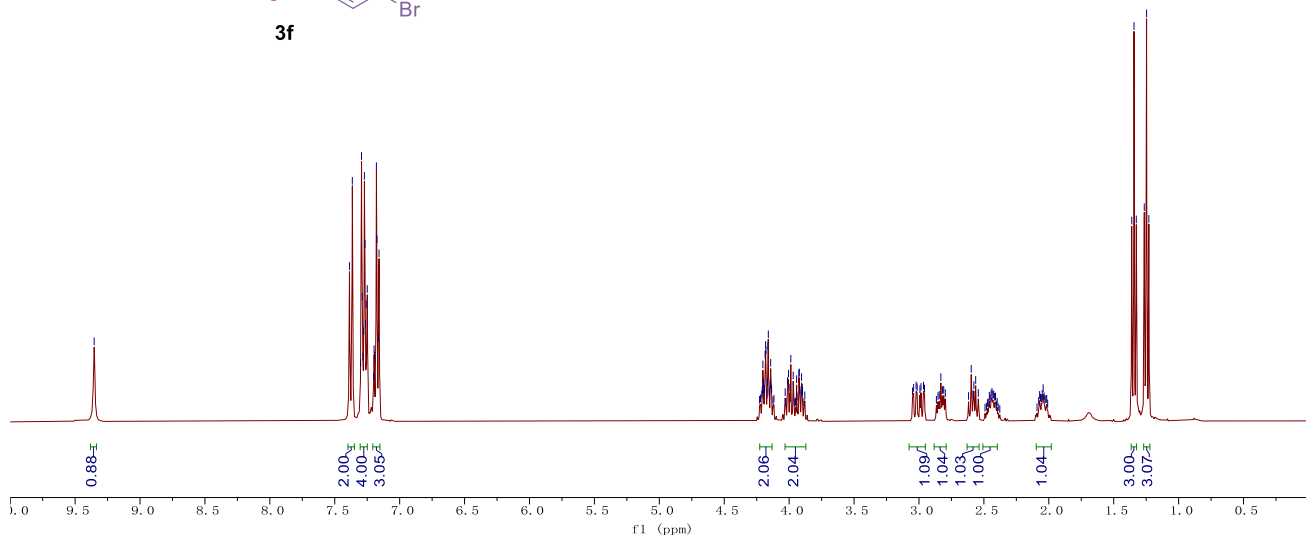

13C NMR CDCl3 100.62MHz

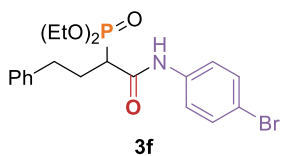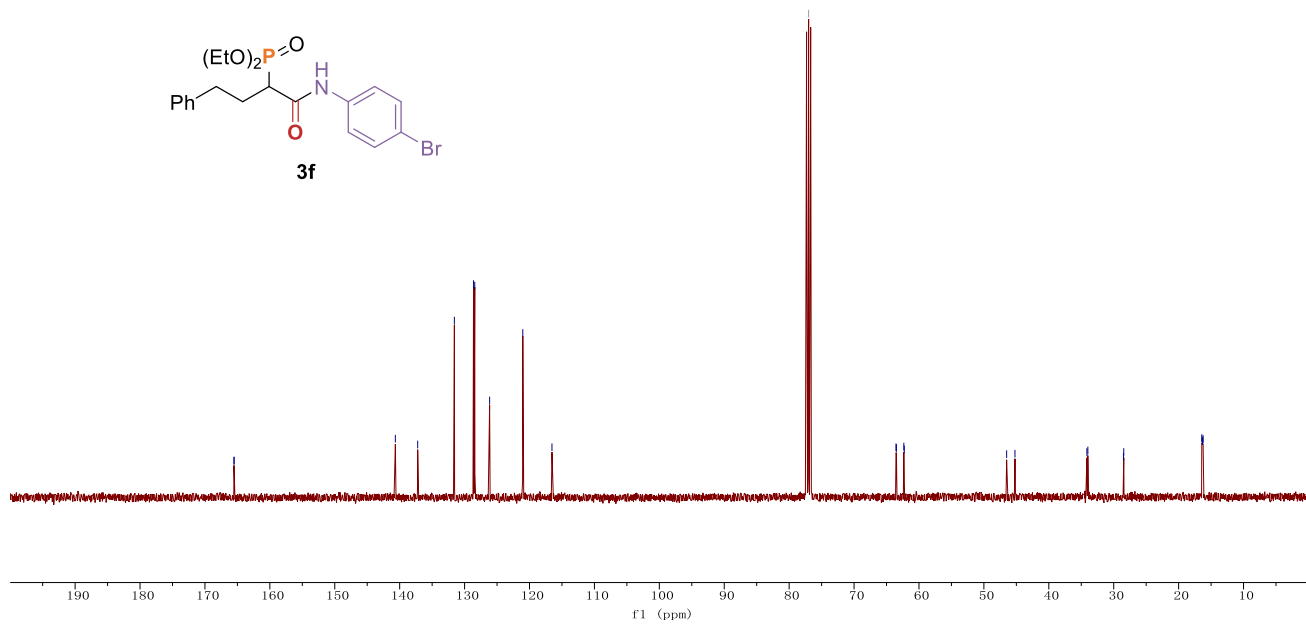

31P NMR CDCl3 161.97MHz

— 25.16

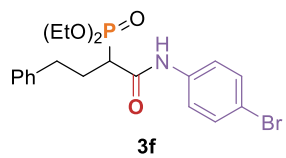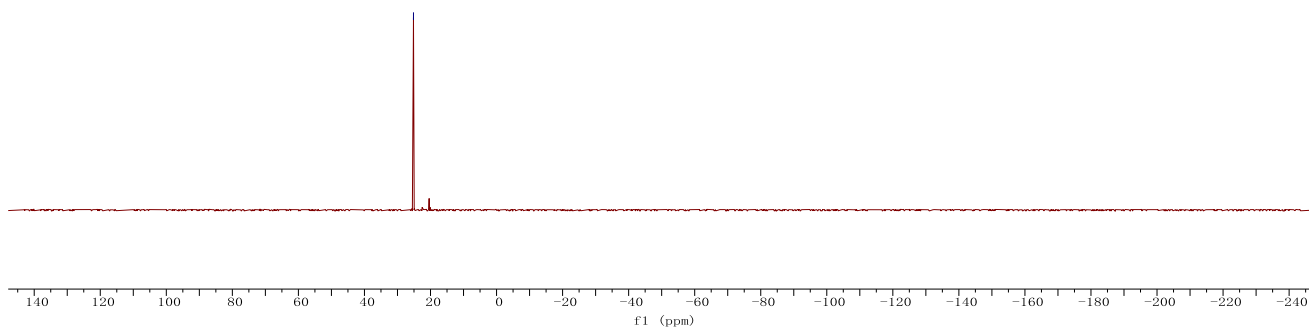

1H NMR CDCl3 400.13MHz

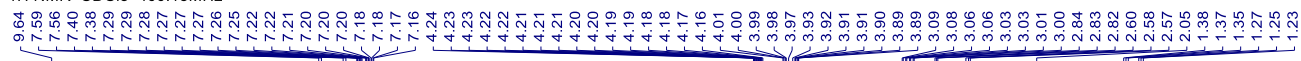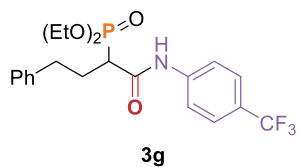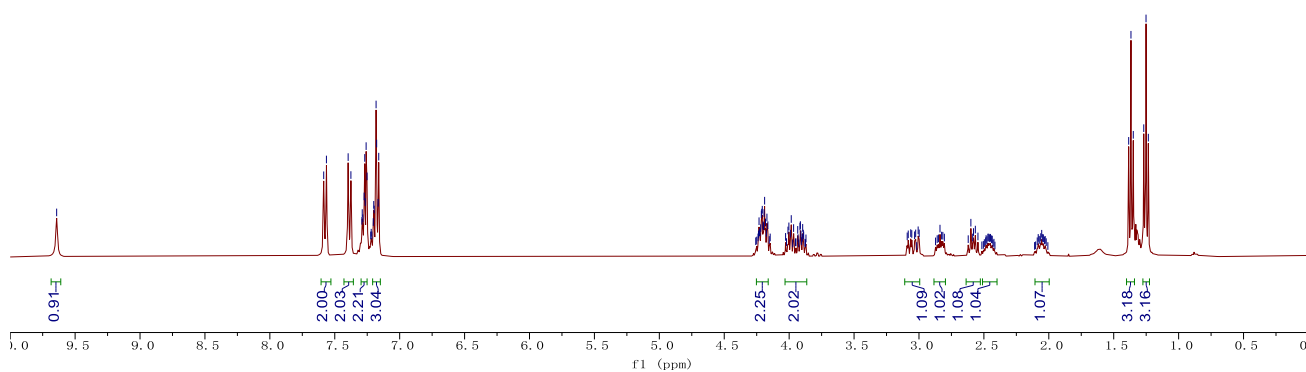

13C NMR CDCl3 100.62MHz

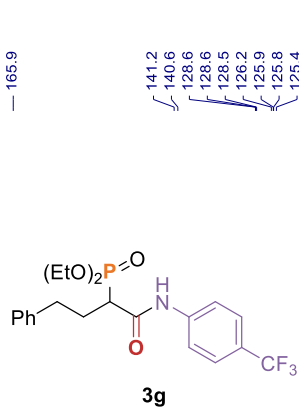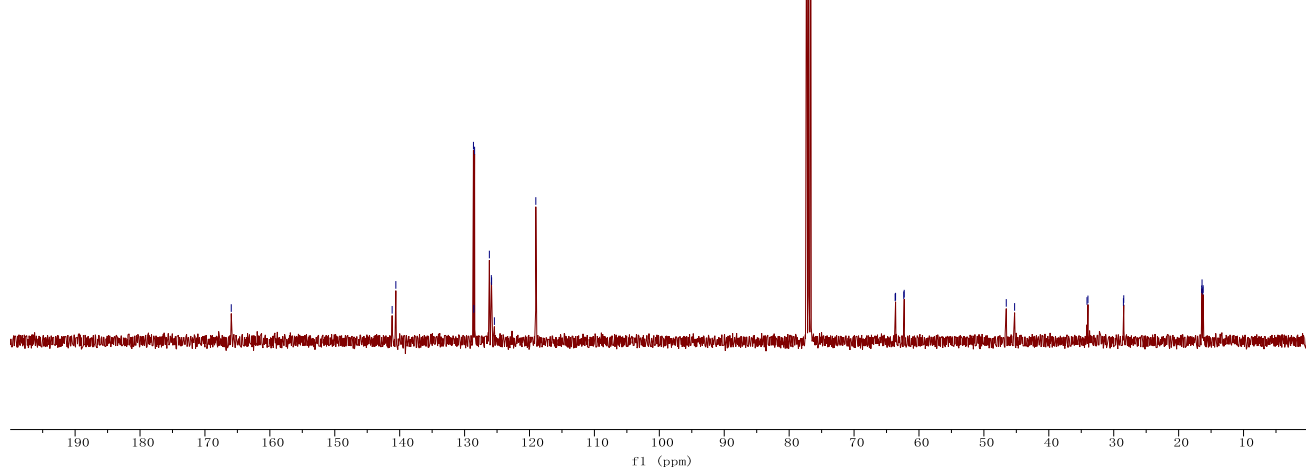

19F NMR DMSO-d6 376.46MHz

-62.25

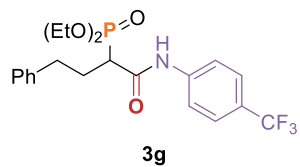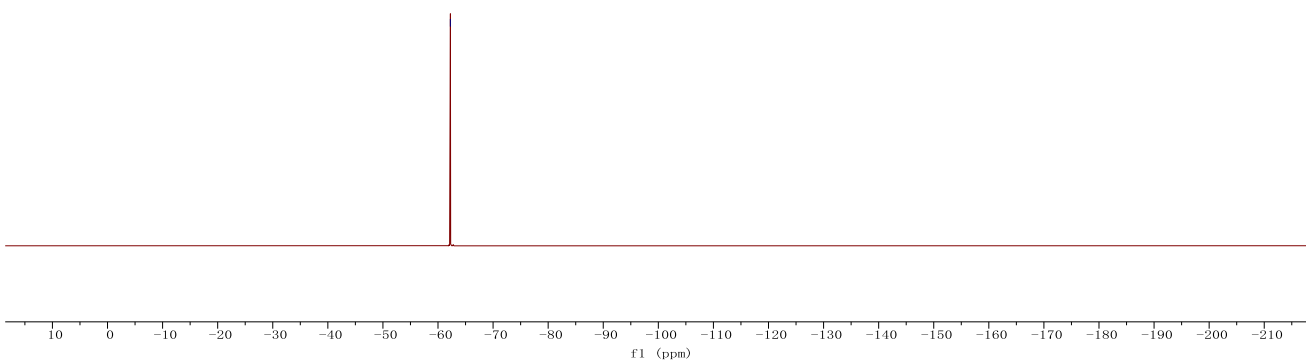

31P NMR CDCl3 161.97MHz

-25.01

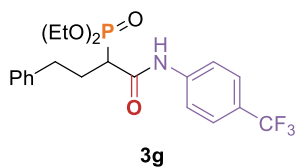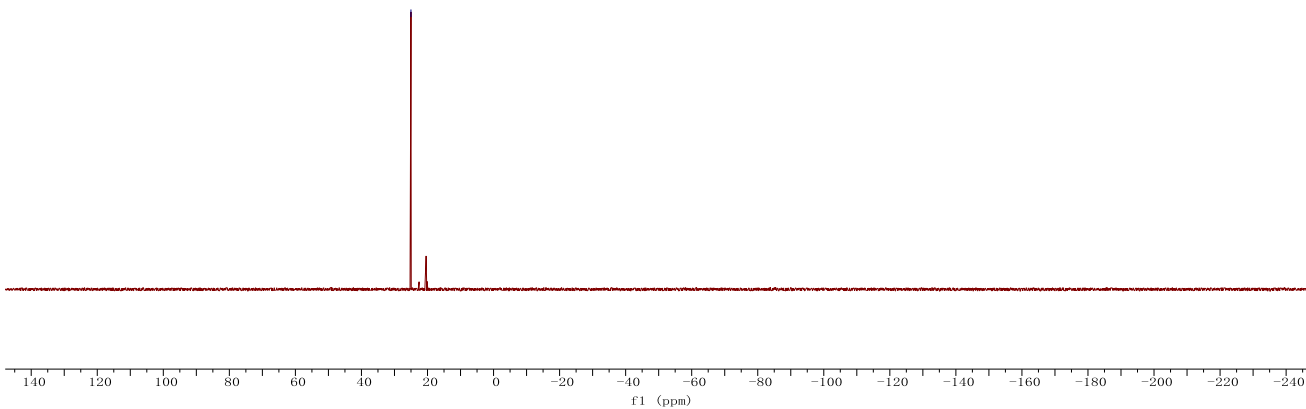

1H NMR CDCl3 400.13MHz

8.37  
7.90  
7.88  
7.31  
7.31  
7.31  
7.30  
7.29  
7.28  
7.28  
7.27  
7.23  
7.22  
7.21  
7.20  
7.19  
7.19  
7.19  
7.18  
7.18  
7.18  
7.09  
7.07  
7.05  
4.17  
4.16  
4.16  
4.16  
4.15  
4.15  
4.14  
4.14  
4.14  
4.14  
4.13  
4.13  
4.13  
4.12  
4.12  
4.11  
4.11  
4.10  
4.10  
4.10  
4.09  
4.09  
4.08  
4.07  
2.97  
2.96  
2.94  
2.93  
2.93  
2.92  
2.91  
2.90  
2.89  
2.88  
2.87  
2.74  
2.72  
2.71  
2.33  
1.33  
1.32  
1.31  
1.30  
1.29

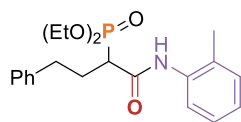

3h

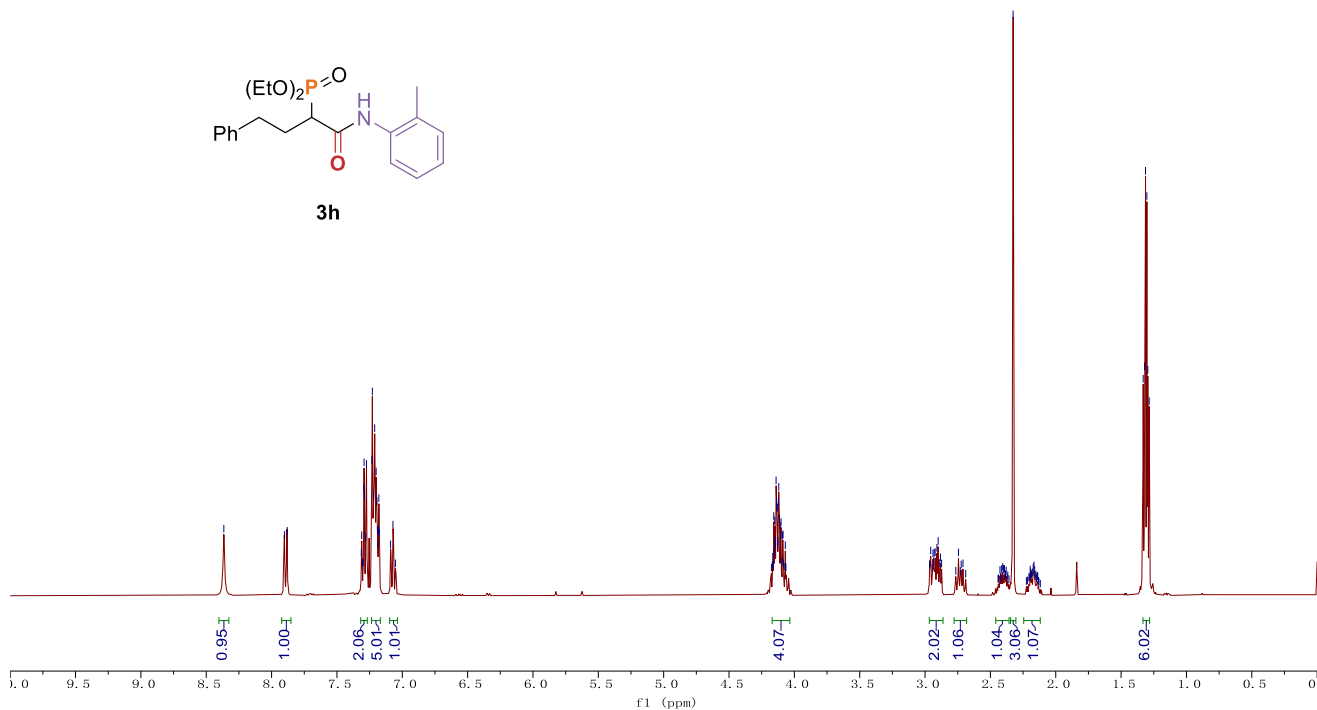

13C NMR CDCl3 100.62MHz

165.3  
165.3  
140.7  
136.8  
130.5  
129.0  
128.6  
128.5  
126.6  
126.2  
125.0  
122.5

77.0 CDCl3

63.0  
62.9  
62.8  
62.8  
46.2  
44.9  
34.2  
34.0  
28.7  
28.6  
17.8  
16.4  
16.3  
16.3

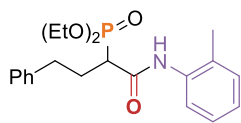

3h

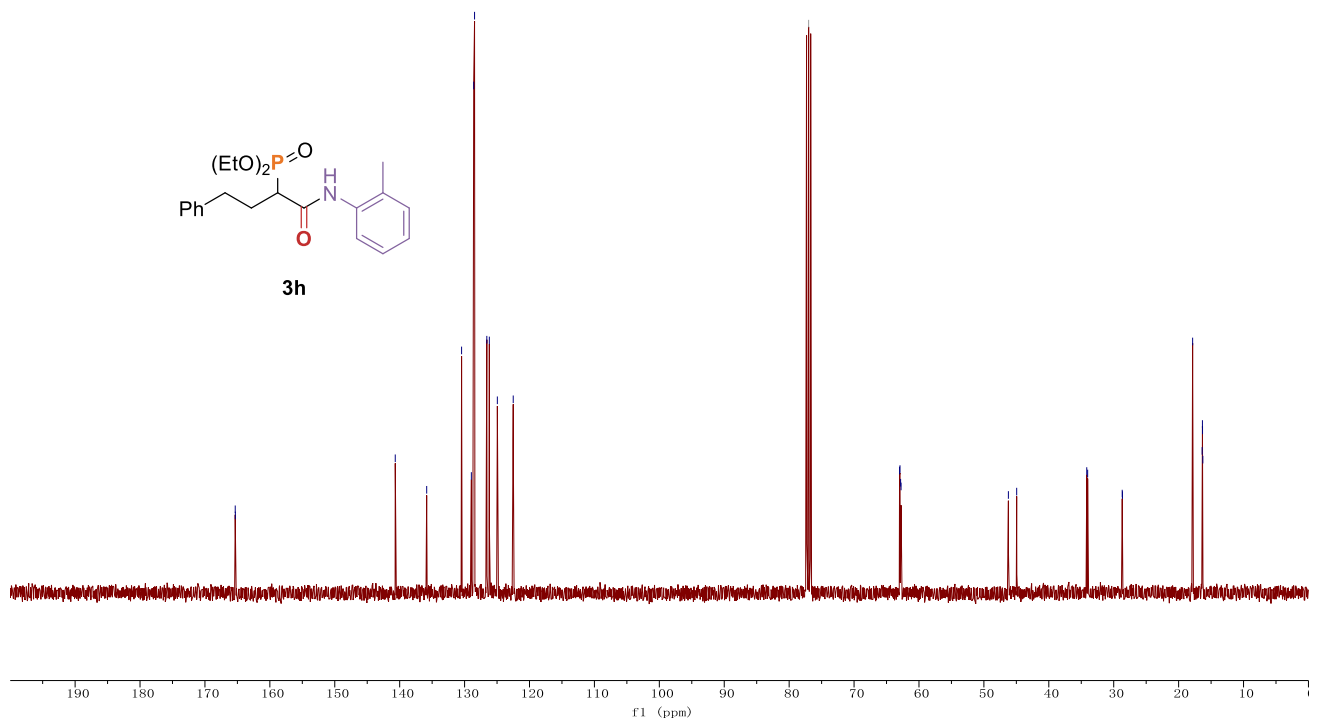

31P NMR CDCl3 161.97MHz

25.89

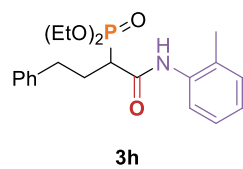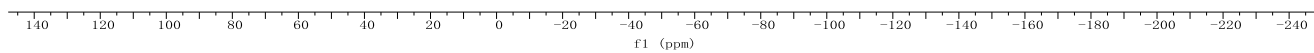

1H NMR CDCl3 400.13MHz

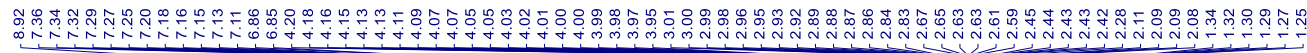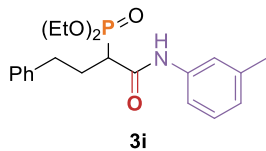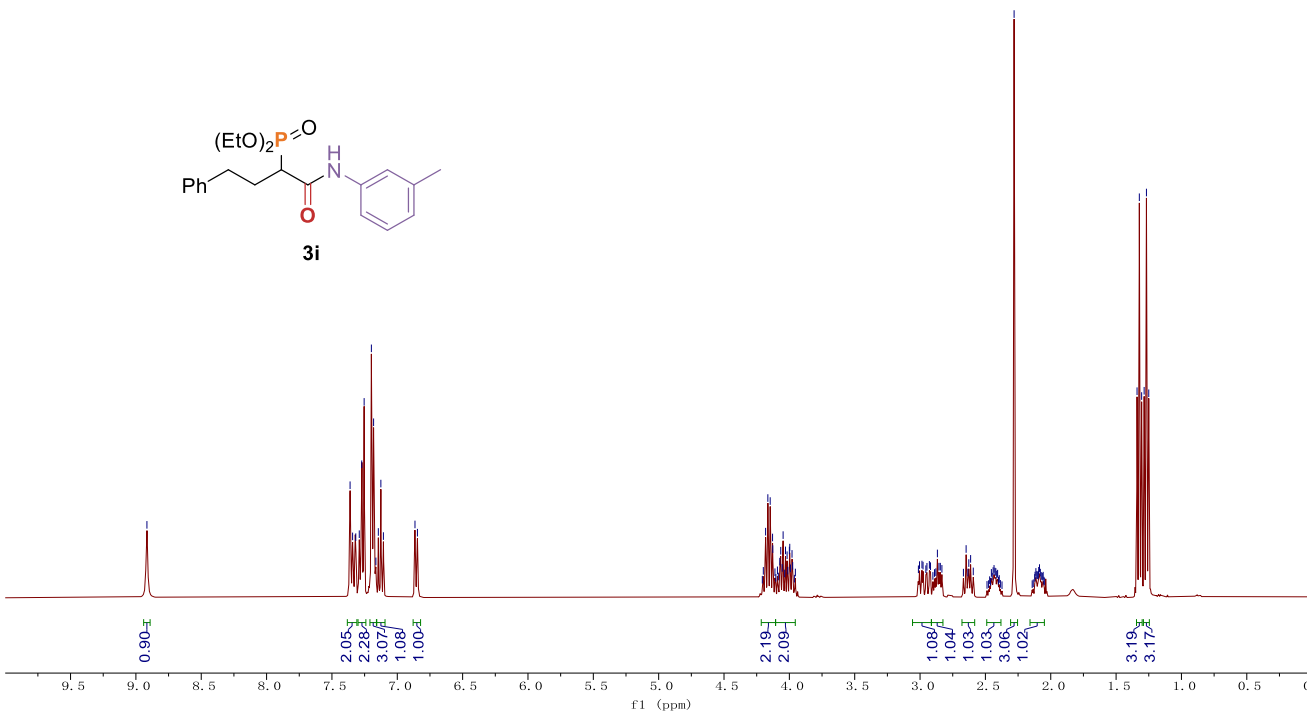

13C NMR CDCl3 100.62MHz

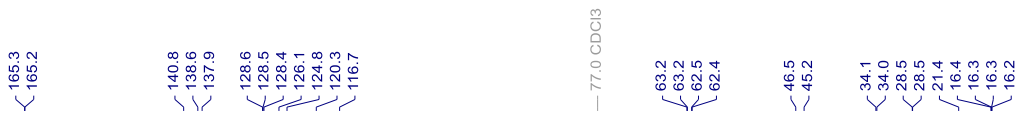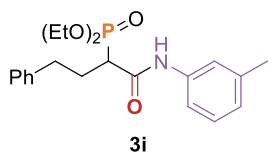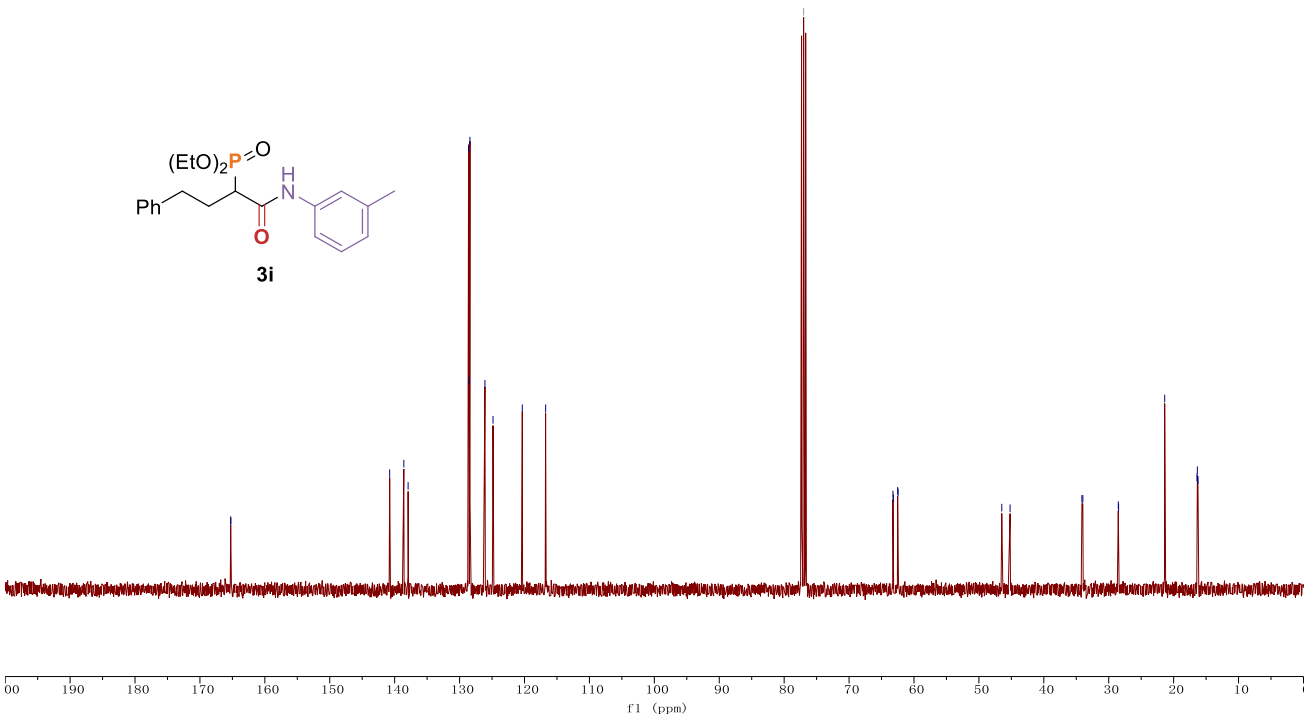

31P NMR CDCl3 161.97MHz

25.43

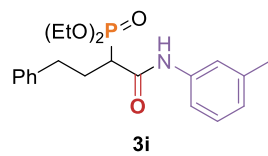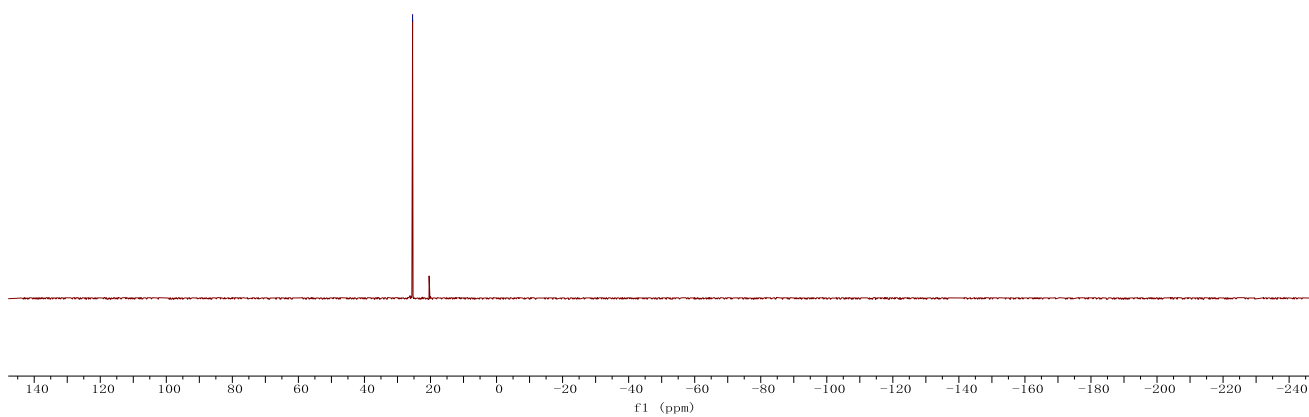



1H NMR CDCl3 400.13MHz

9.17, 7.29, 7.27, 7.27, 7.26, 7.25, 7.25, 7.22, 7.19, 7.19, 7.18, 7.12, 7.10, 7.08, 7.07, 7.05, 6.58, 6.56, 4.20, 4.20, 4.19, 4.18, 4.17, 4.16, 4.16, 4.15, 4.14, 4.14, 4.14, 4.06, 4.04, 4.03, 4.02, 4.02, 4.00, 3.98, 3.96, 3.96, 3.95, 3.94, 3.94, 3.93, 3.75, 3.06, 3.05, 3.03, 3.02, 3.00, 2.99, 2.98, 2.97, 2.87, 2.86, 2.84, 2.83, 2.82, 2.63, 2.61, 2.61, 2.59, 2.45, 2.45, 2.44, 2.07, 2.07, 1.35, 1.33, 1.31, 1.27, 1.26, 1.24

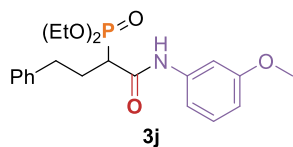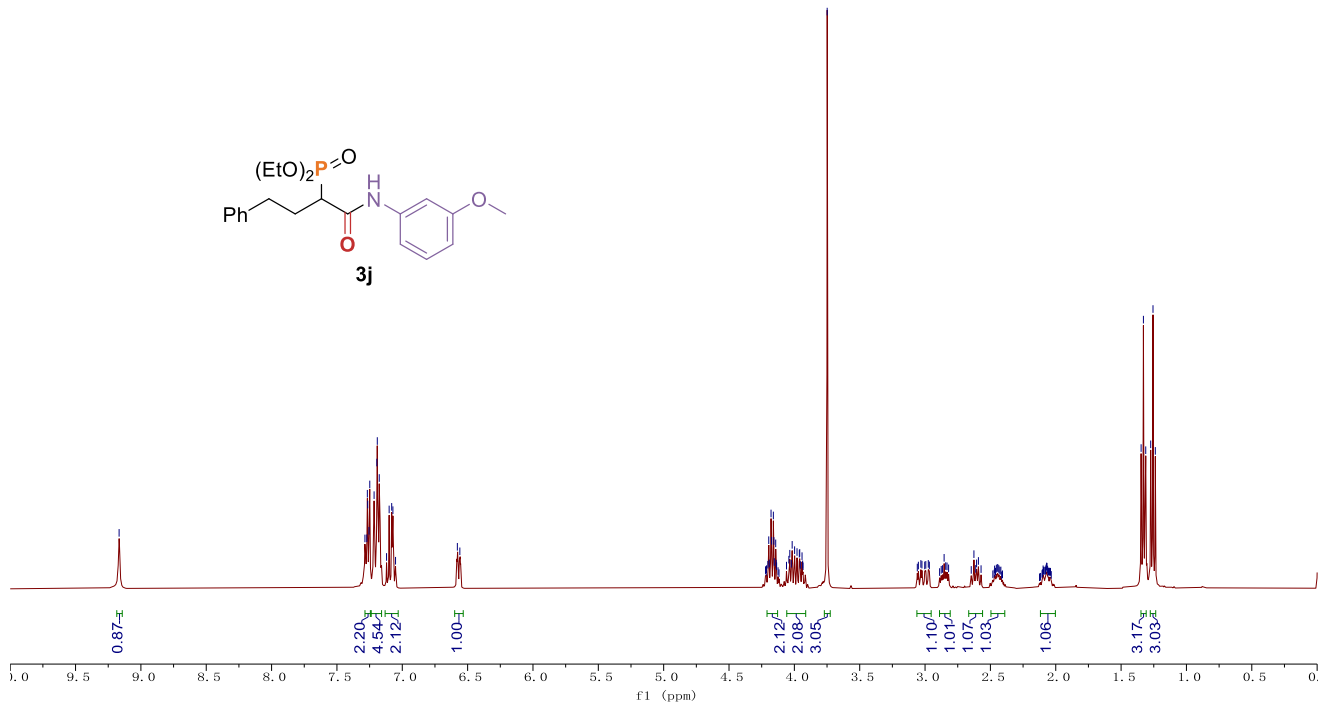

13C NMR CDCl3 100.62MHz

165.4, 165.4, 159.8, 140.7, 139.3, 129.3, 128.6, 128.4, 126.1, 111.8, 110.2, 104.9, 77.0 CDCl3, 63.3, 63.3, 62.4, 62.3, 55.1, 46.6, 45.3, 34.1, 34.0, 28.5, 28.5, 16.4, 16.3, 16.3, 16.2

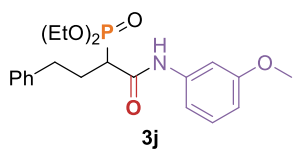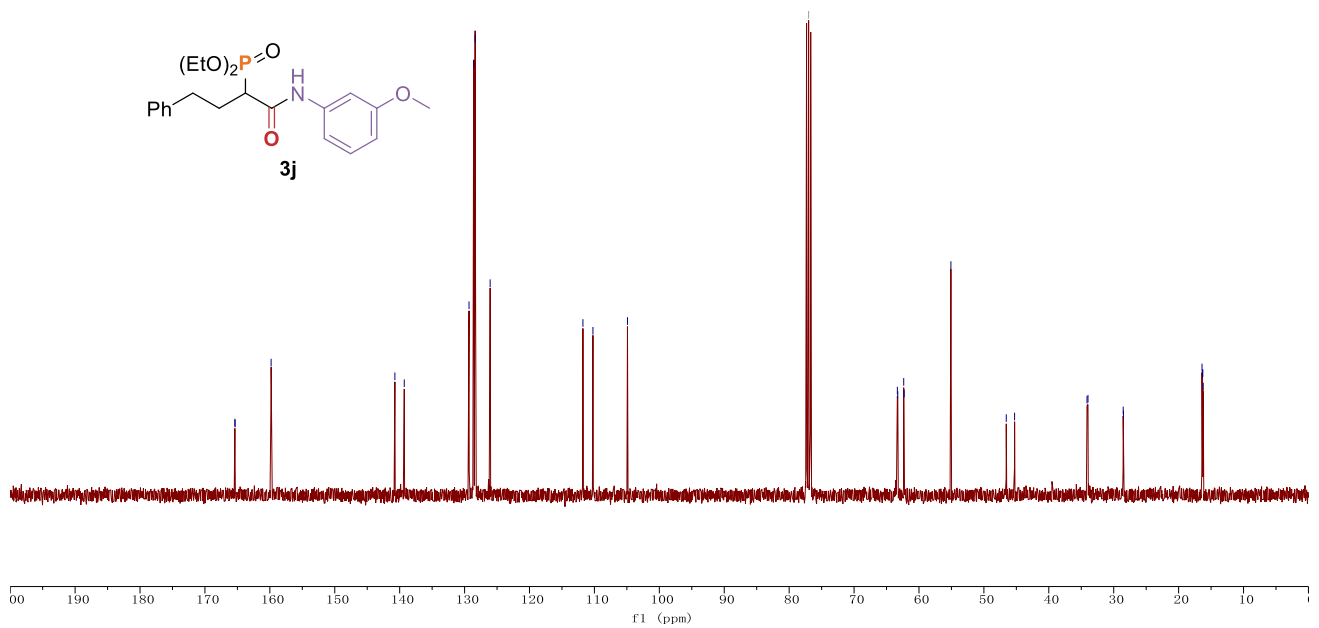

31P NMR CDCl3 161.97MHz

25.31

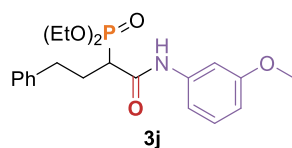

1H NMR CDCl3 400.13MHz

9.47, 7.77, 7.76, 7.76, 7.40, 7.38, 7.30, 7.29, 7.28, 7.27, 7.27, 7.27, 7.26, 7.25, 7.25, 7.25, 7.22, 7.22, 7.21, 7.20, 7.20, 7.19, 7.19, 7.18, 7.18, 7.18, 7.17, 7.16, 7.16, 7.11, 7.09, 7.03, 7.01, 6.99, 4.23, 4.23, 4.22, 4.22, 4.21, 4.21, 4.20, 4.20, 4.20, 4.19, 4.19, 4.18, 4.18, 4.17, 4.17, 4.16, 4.16, 4.01, 4.00, 3.98, 3.96, 3.94, 3.92, 3.92, 3.90, 3.03, 3.02, 2.99, 2.97, 2.83, 2.59, 2.56, 1.38, 1.36, 1.25, 1.23

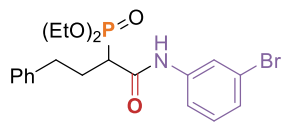

3k

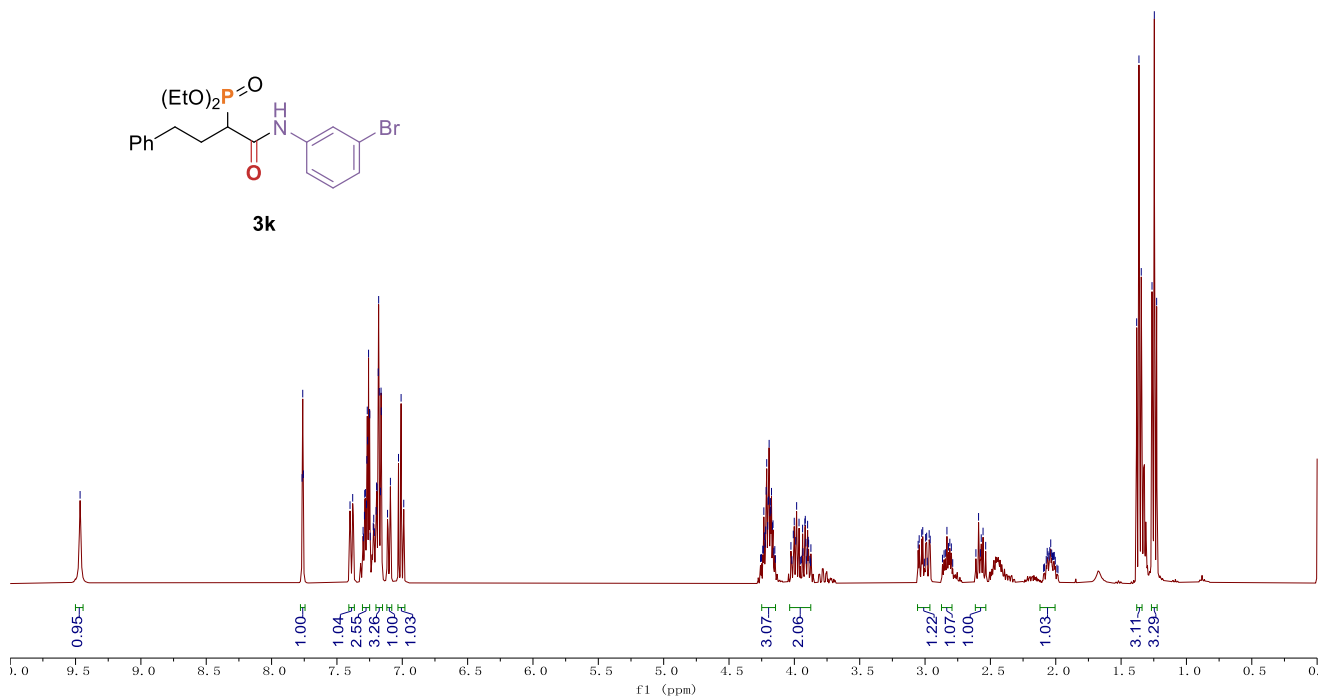

13C NMR CDCl3 100.62MHz

165.5, 140.7, 139.4, 129.9, 128.6, 128.6, 128.6, 128.4, 126.8, 126.1, 122.3, 117.8, 77.0 CDCl3, 63.7, 63.6, 62.3, 62.2, 46.5, 45.2, 34.1, 34.0, 28.5, 28.4, 16.5, 16.4, 16.3, 16.2

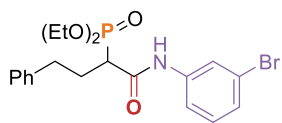

3k

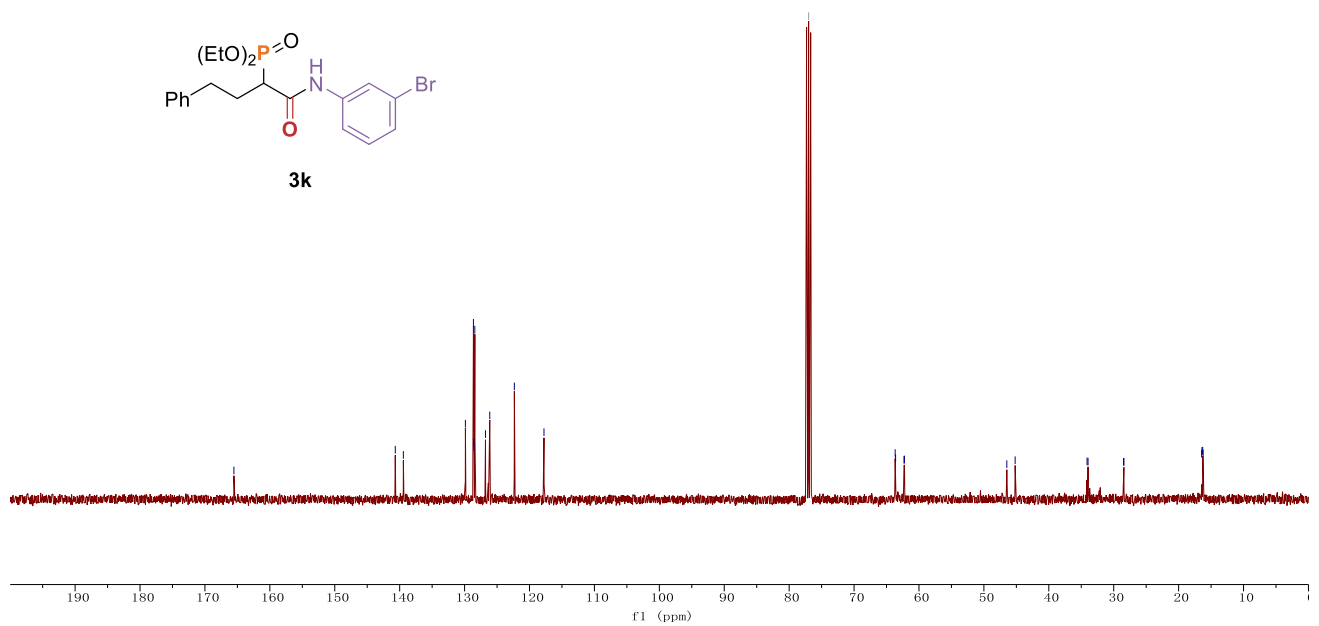

25.14

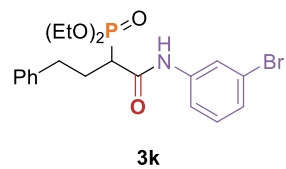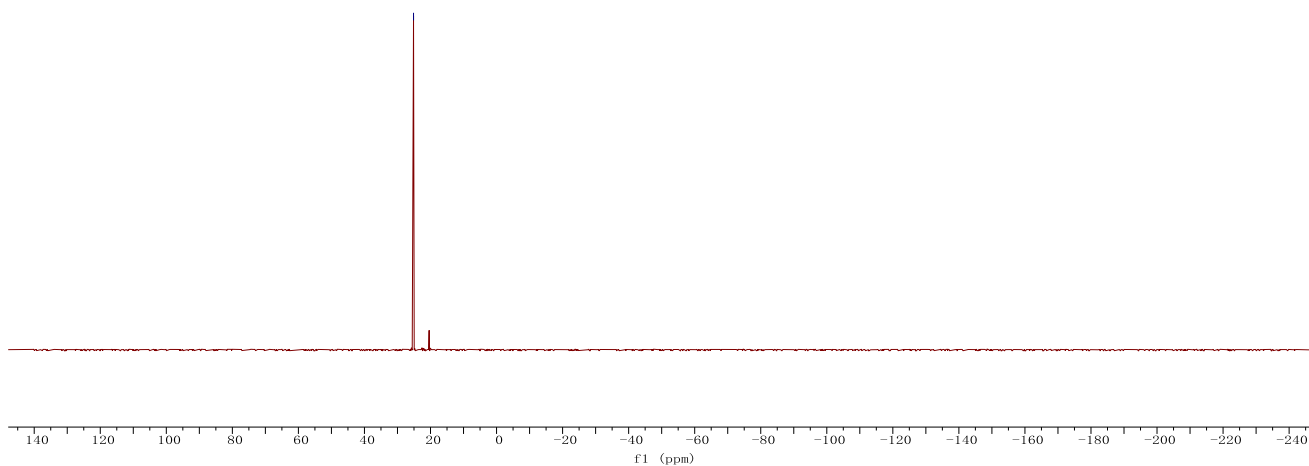

1H NMR CDCl3 400.13MHz

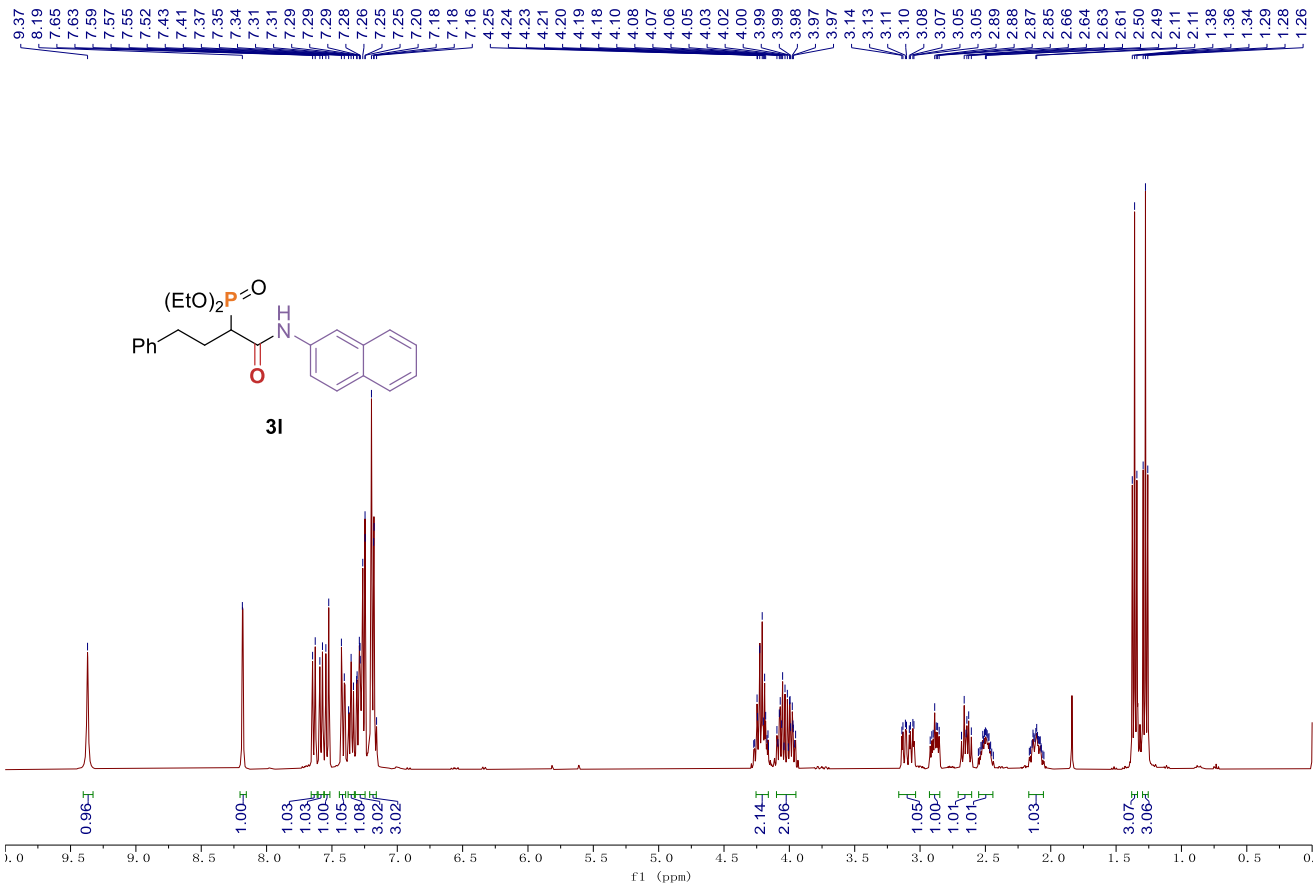

13C NMR CDCl3 100.62MHz

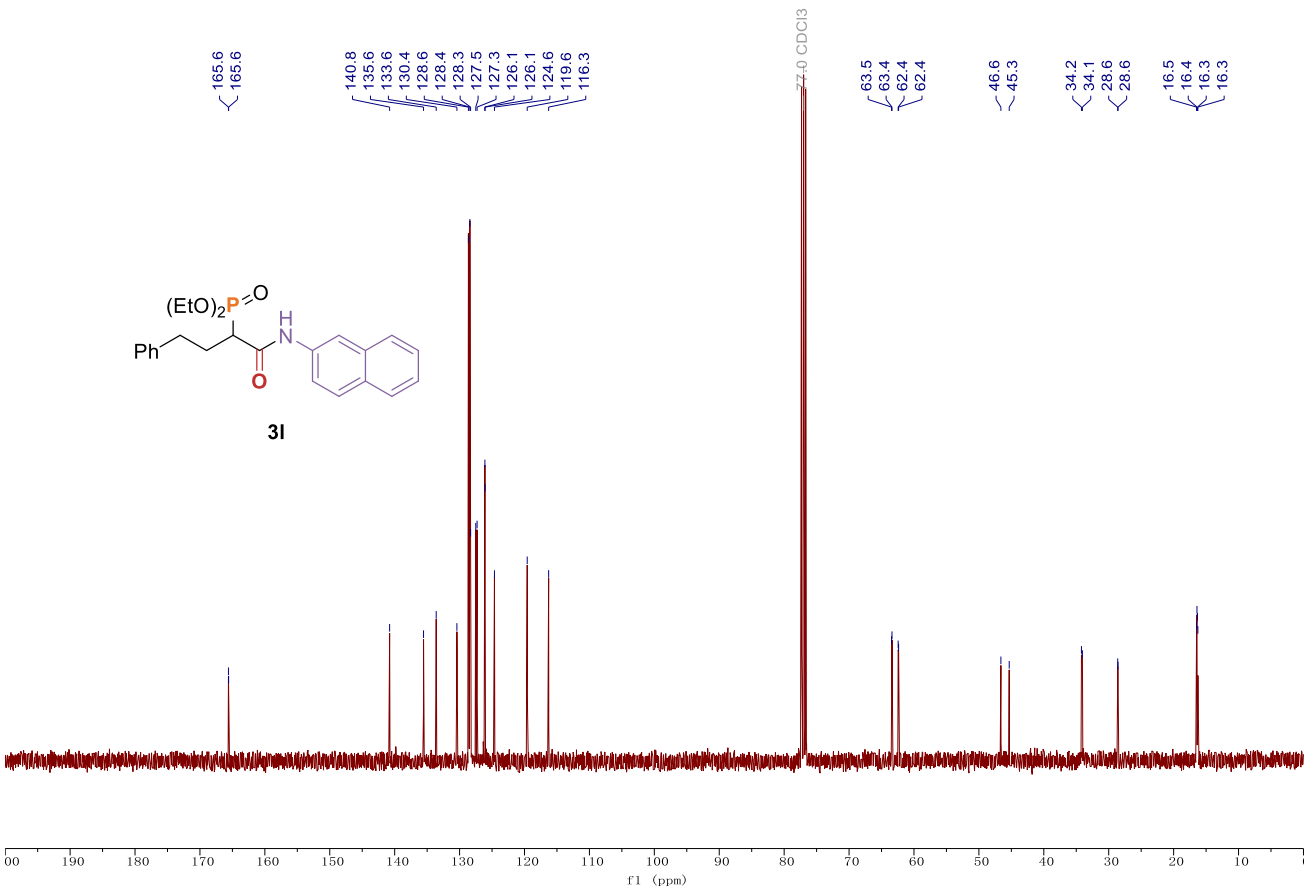

— 25.39

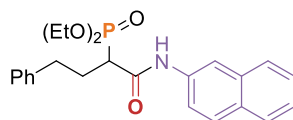

**31**

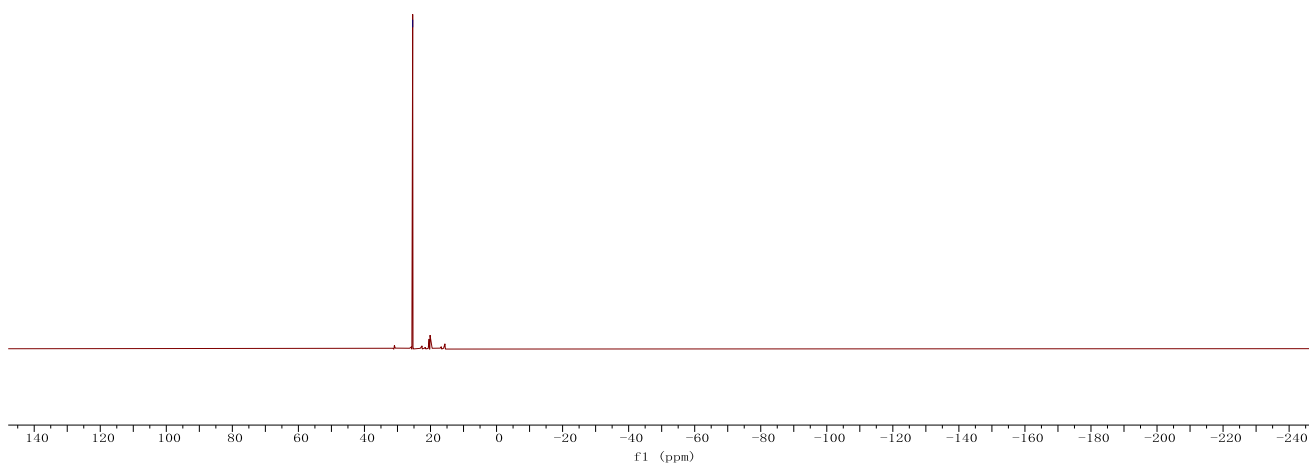

1H NMR CDCl3 400.13MHz

7.33  
7.32  
7.29  
7.29  
7.28  
7.28  
7.27  
7.27  
7.26  
7.26  
7.25  
7.25  
7.24  
7.24  
7.21  
7.21  
7.20  
7.20  
7.18  
7.18  
7.17  
7.17  
7.16  
7.16  
7.15  
7.15  
7.14  
7.14  
6.79  
6.79  
4.50  
4.50  
4.49  
4.48  
4.48  
4.48  
4.48  
4.09  
4.08  
4.08  
4.07  
4.07  
4.07  
4.06  
4.06  
4.06  
4.05  
4.05  
4.04  
4.04  
4.04  
4.04  
4.03  
4.03  
4.02  
4.02  
4.00  
4.00  
4.00  
3.98  
2.82  
2.80  
2.79  
2.77  
2.76  
2.73  
2.71  
2.70  
2.64  
2.60  
1.28  
1.28  
1.27  
1.26  
1.25  
1.24  
1.23

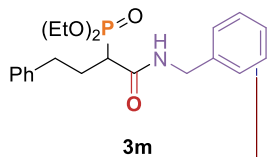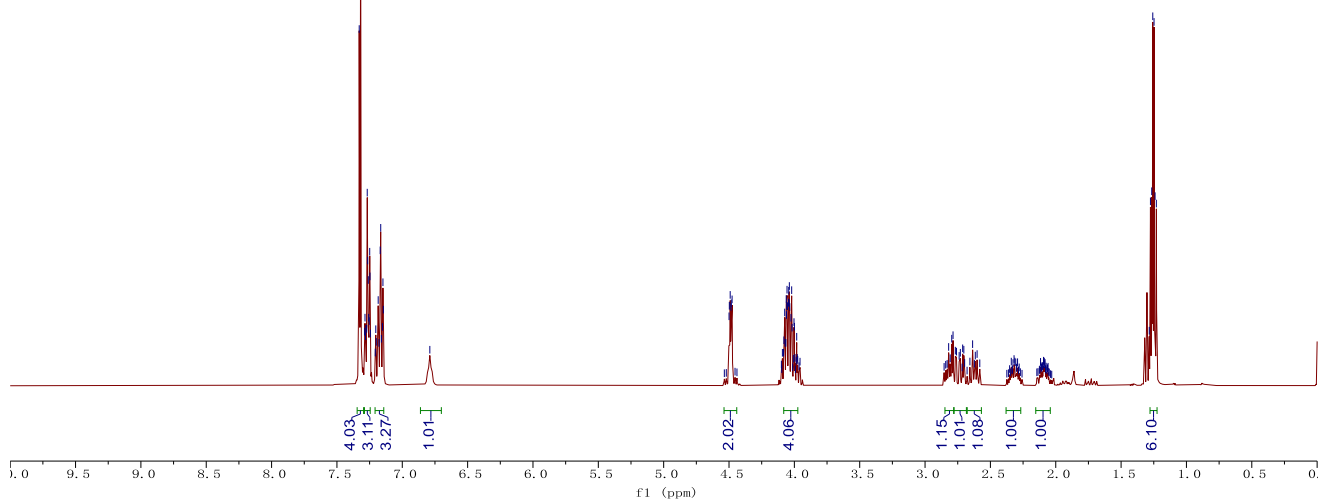

13C NMR CDCl3 100.62MHz

167.1  
167.0  
140.7  
138.1  
128.6  
128.6  
128.4  
127.7  
127.4  
126.1  
77.0 CDCl3  
62.8  
62.7  
62.6  
62.5  
45.7  
44.5  
43.8  
34.1  
33.9  
28.5  
28.5  
16.3  
16.3  
16.2

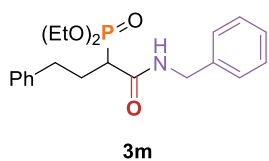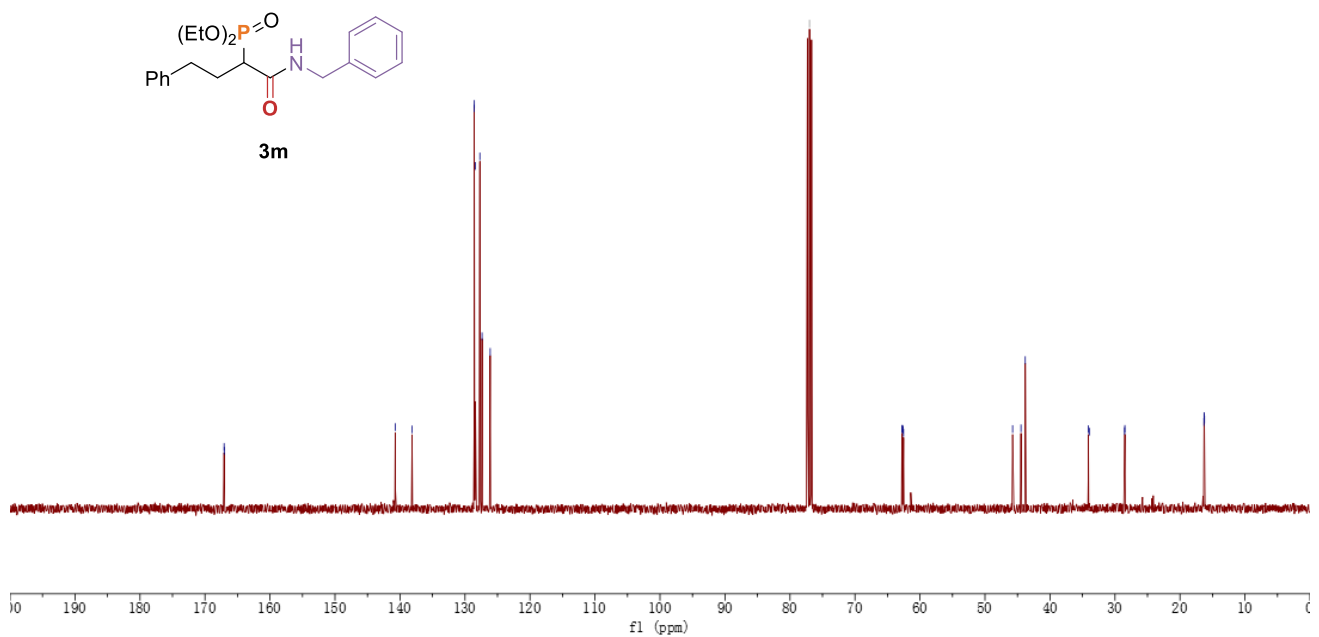

25.43

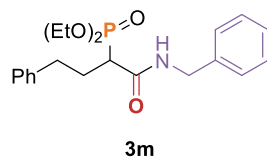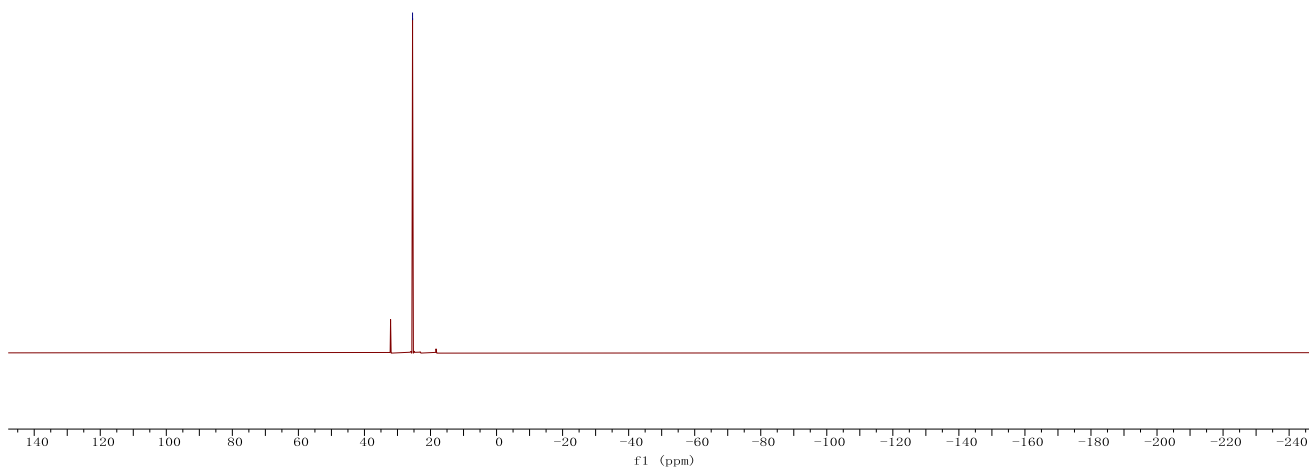



1H NMR CDCl3 400.13MHz

7.30  
7.29  
7.28  
7.26  
7.21  
7.20  
7.19  
7.18  
6.49  
4.13  
4.11  
4.11  
4.10  
4.09  
4.09  
4.08  
4.08  
4.08  
4.07  
4.07  
4.06  
4.06  
4.05  
4.05  
4.05  
4.04  
4.03  
3.32  
3.30  
3.29  
3.27  
2.82  
2.74  
2.73  
2.72  
2.70  
2.69  
2.67  
2.66  
2.63  
2.06  
1.54  
1.53  
1.52  
1.52  
1.51  
1.50  
1.50  
1.50  
1.48  
1.41  
1.39  
1.39  
1.38  
1.37  
1.37  
1.35  
1.32  
1.31  
1.30  
1.29  
1.29  
1.27  
0.95  
0.91

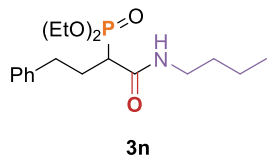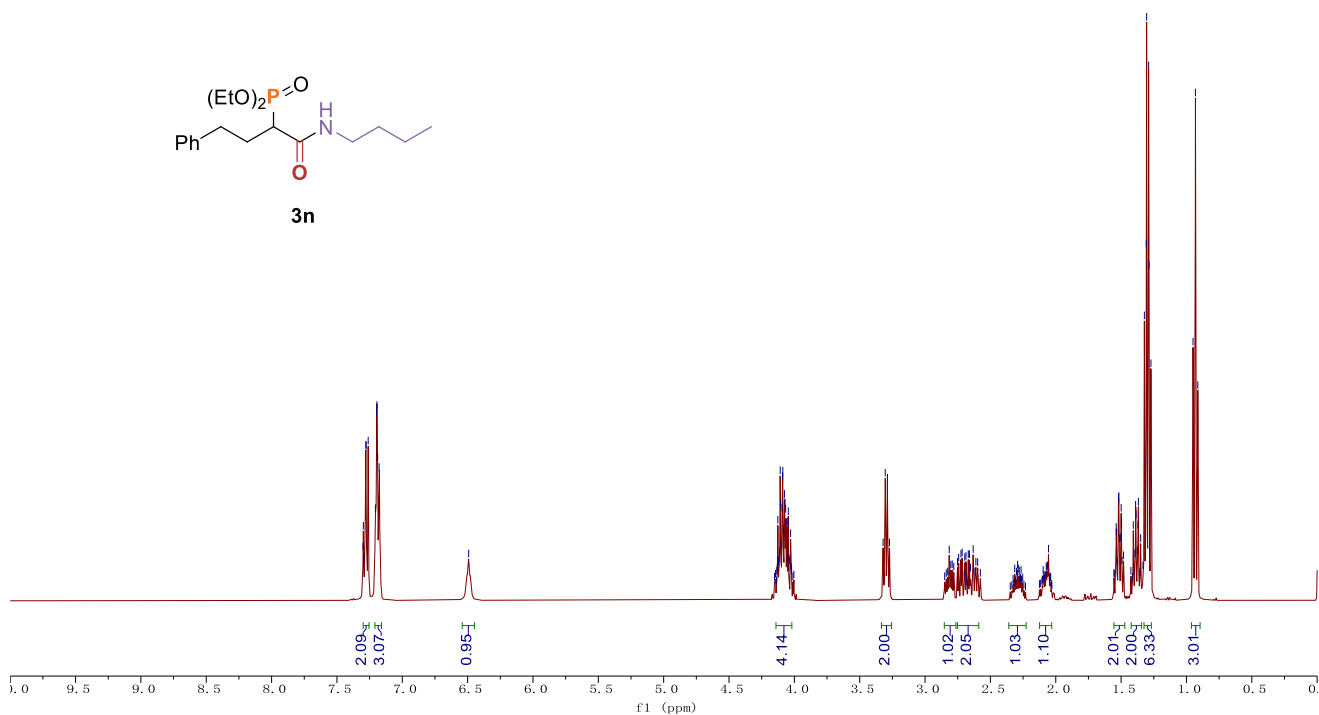

13C NMR CDCl3 100.62MHz

167.0  
167.0

140.8

128.5  
128.4  
126.1

77.0 CDCl3

62.7  
62.6  
62.5  
62.4

45.7

44.4

39.5

34.1

33.9

31.5

28.6

28.6

19.9

16.3

16.3

16.3

16.2

13.6

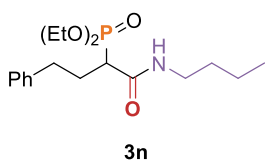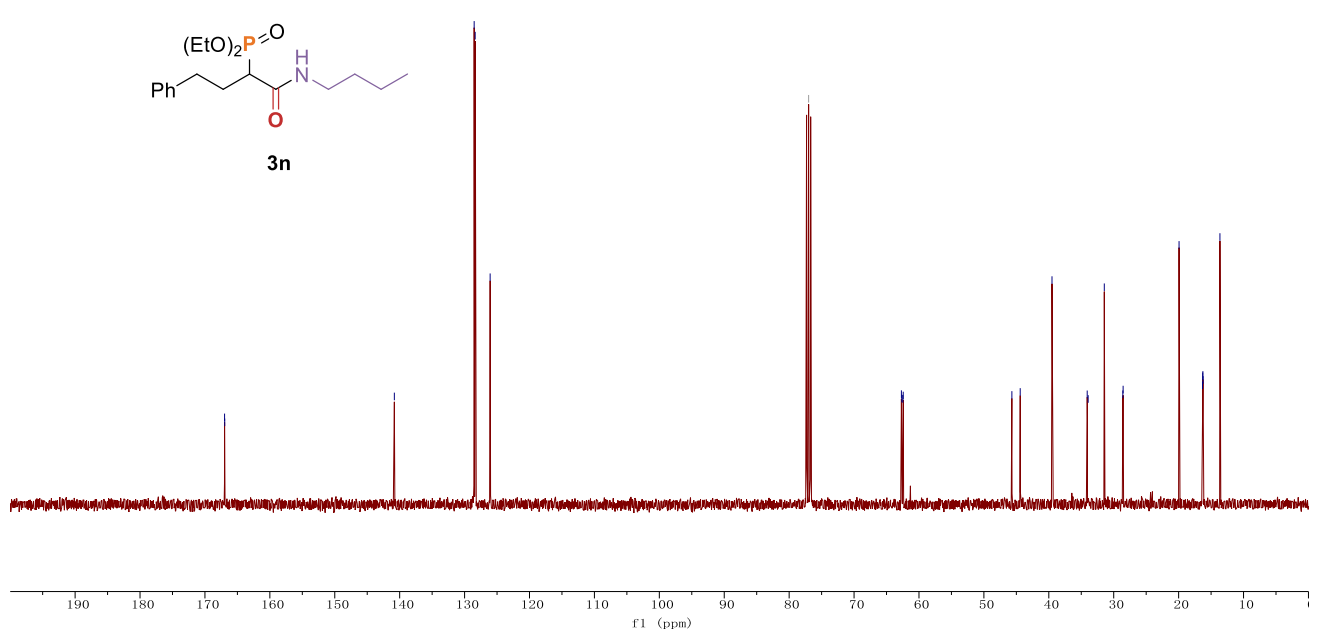

31P NMR CDCl3 161.97MHz

25.83

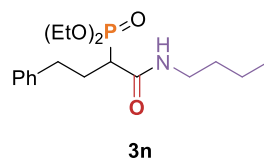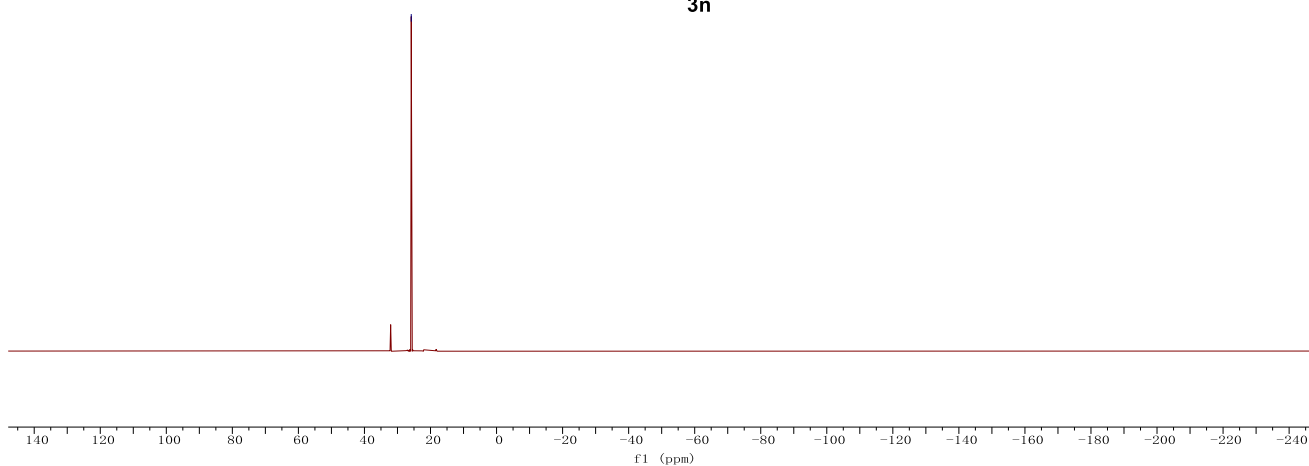

1H NMR CDCl3 400.13MHz

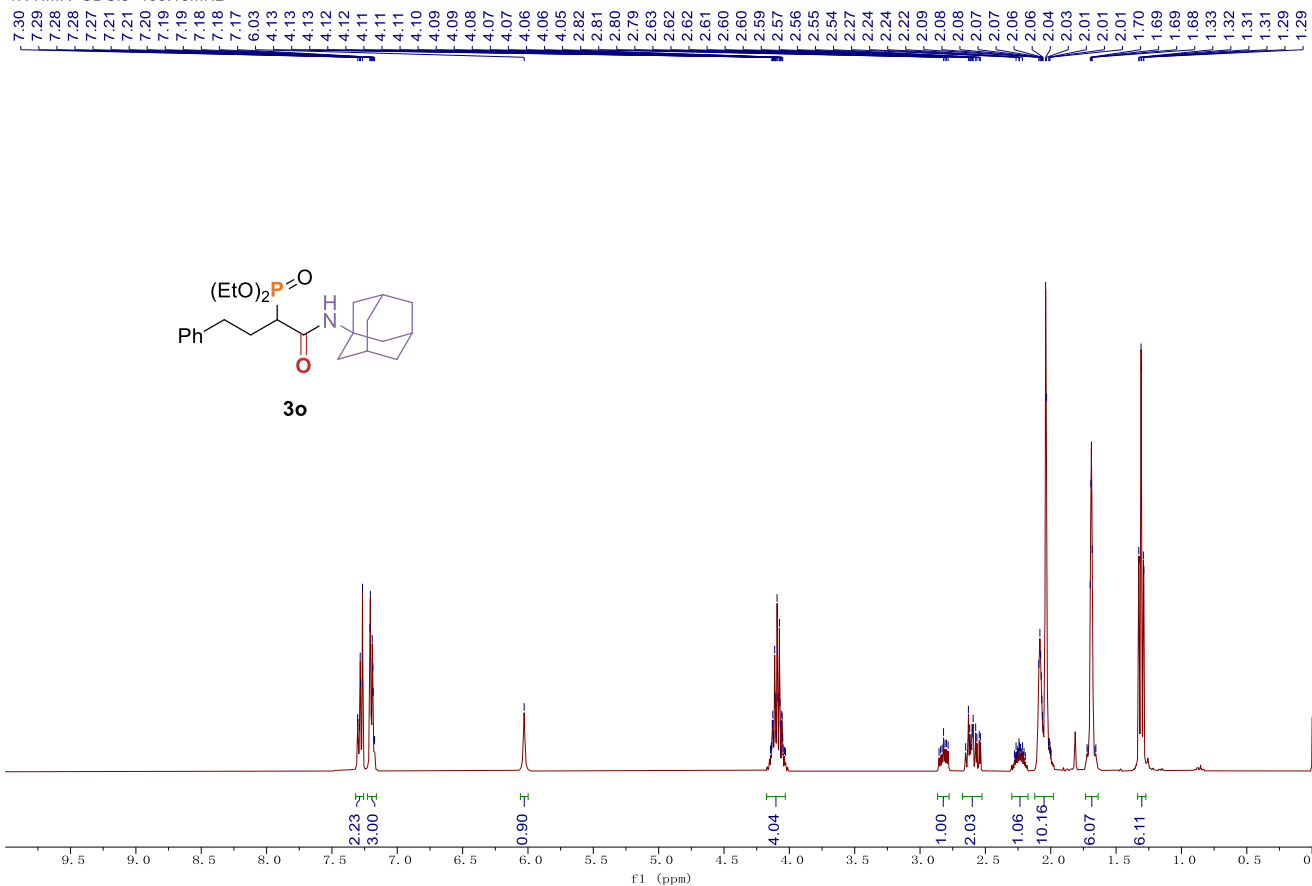

13C NMR CDCl3 100.62MHz

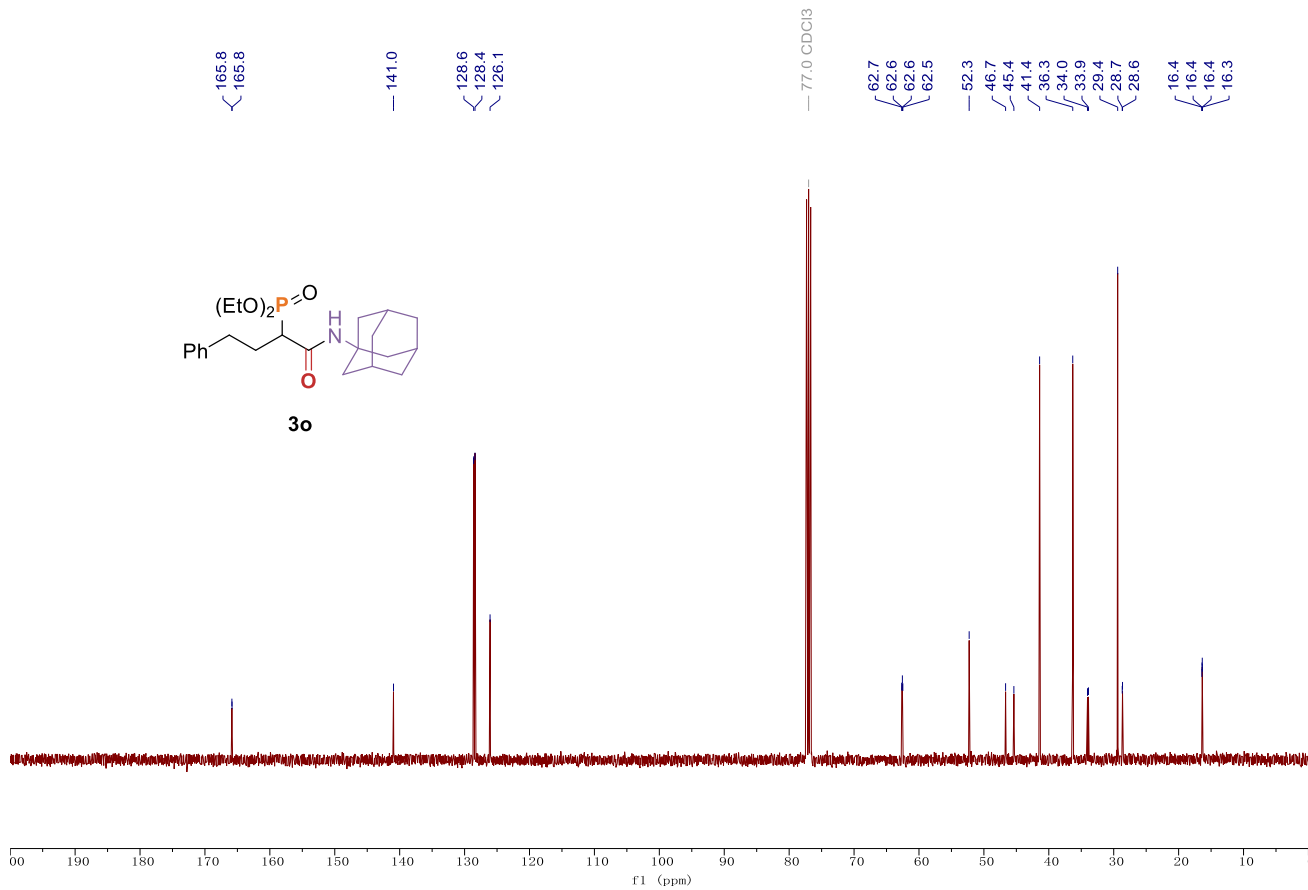

31P NMR CDCl3 161.97MHz

26.04

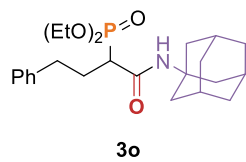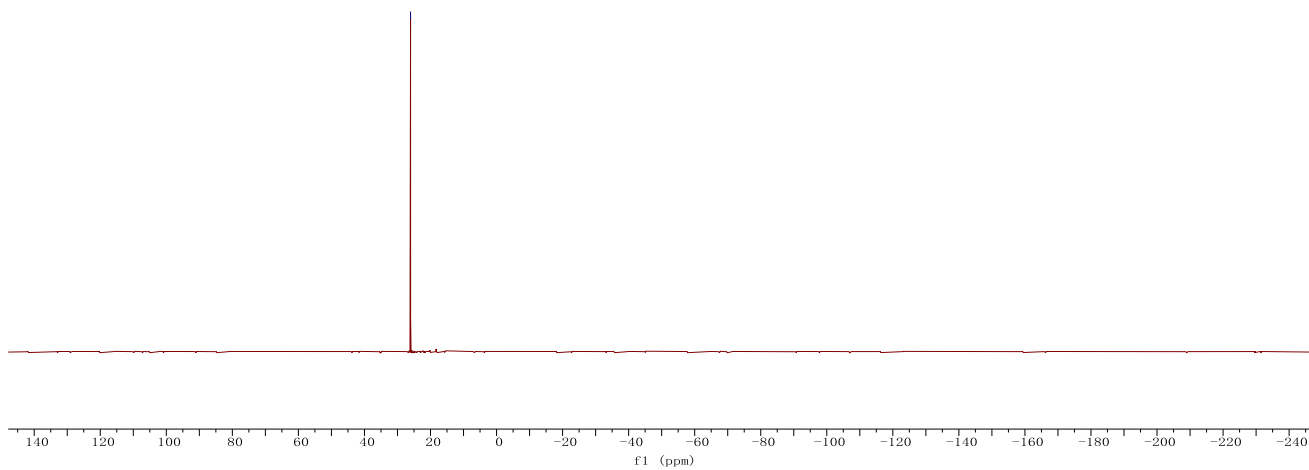

1H NMR CDCl3 400.13MHz

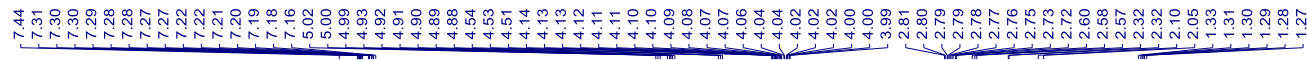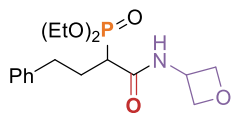

3p

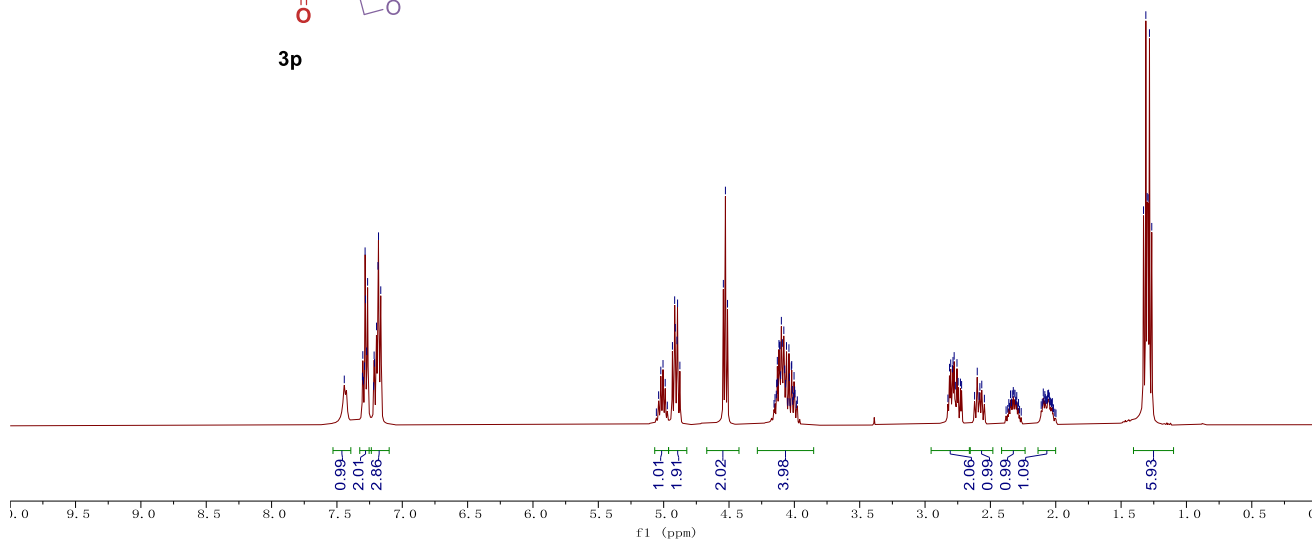

13C NMR CDCl3 100.62MHz

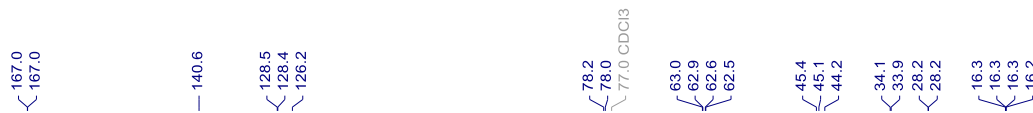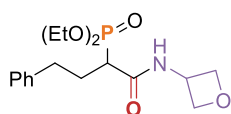

3p

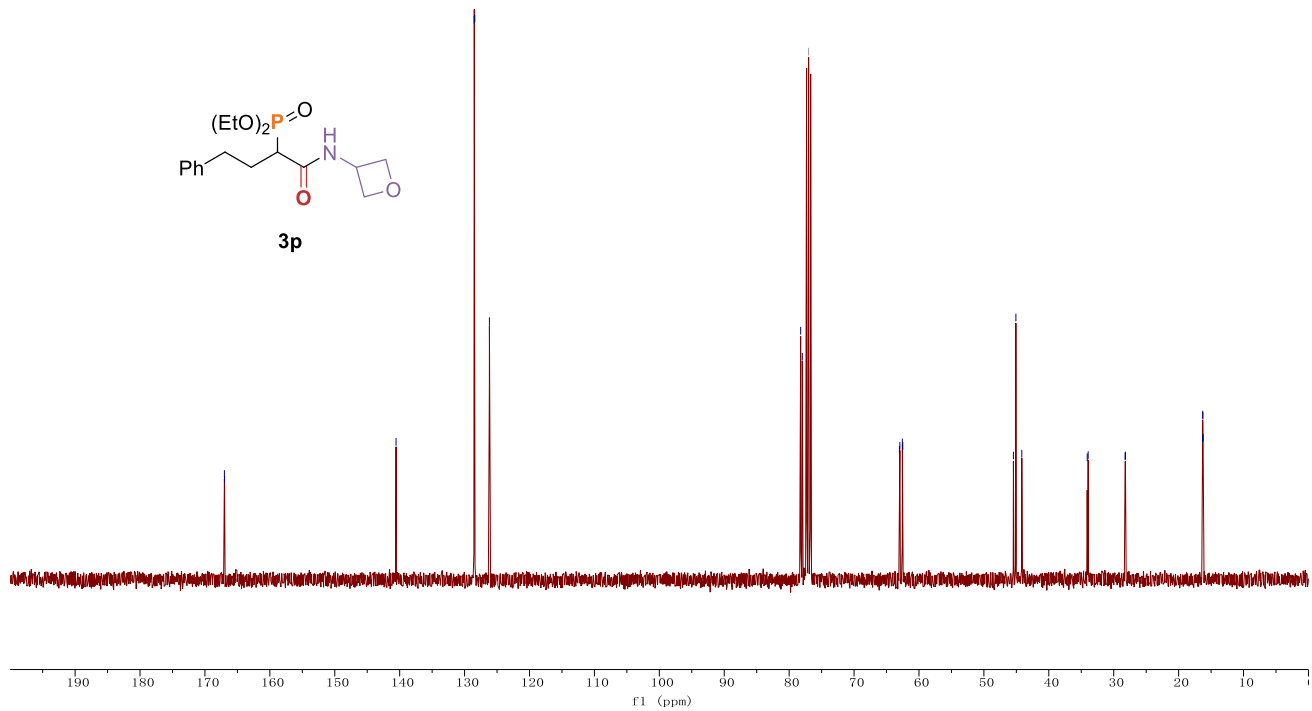

— 24.99

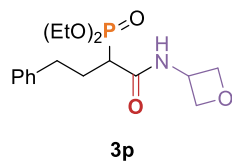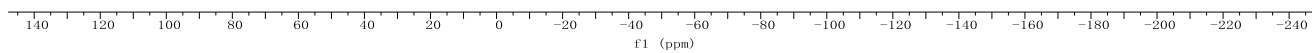

1H NMR CDCl3 400.13MHz

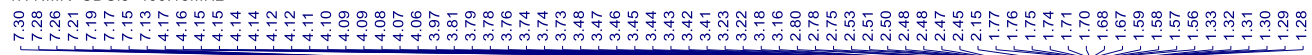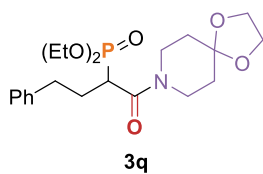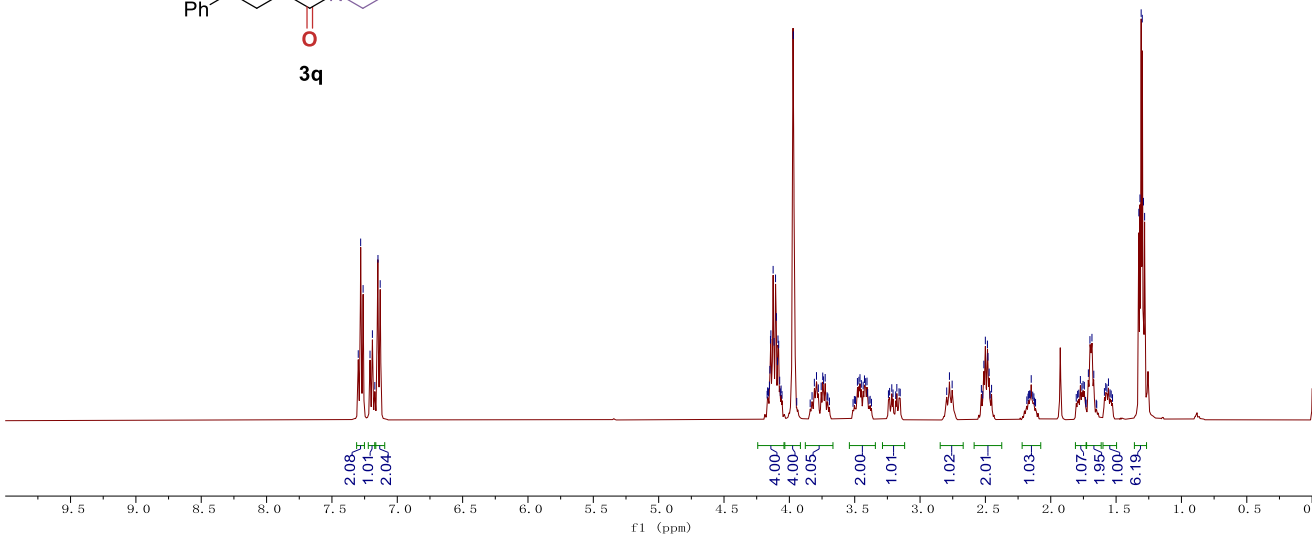

13C NMR CDCl3 100.62MHz

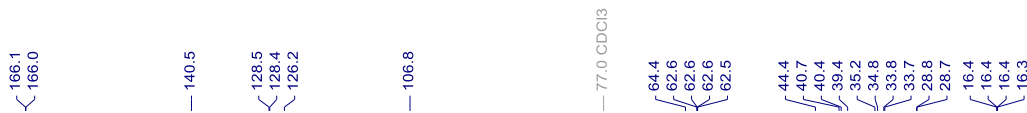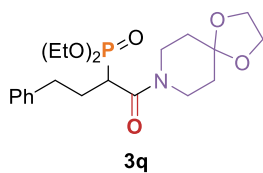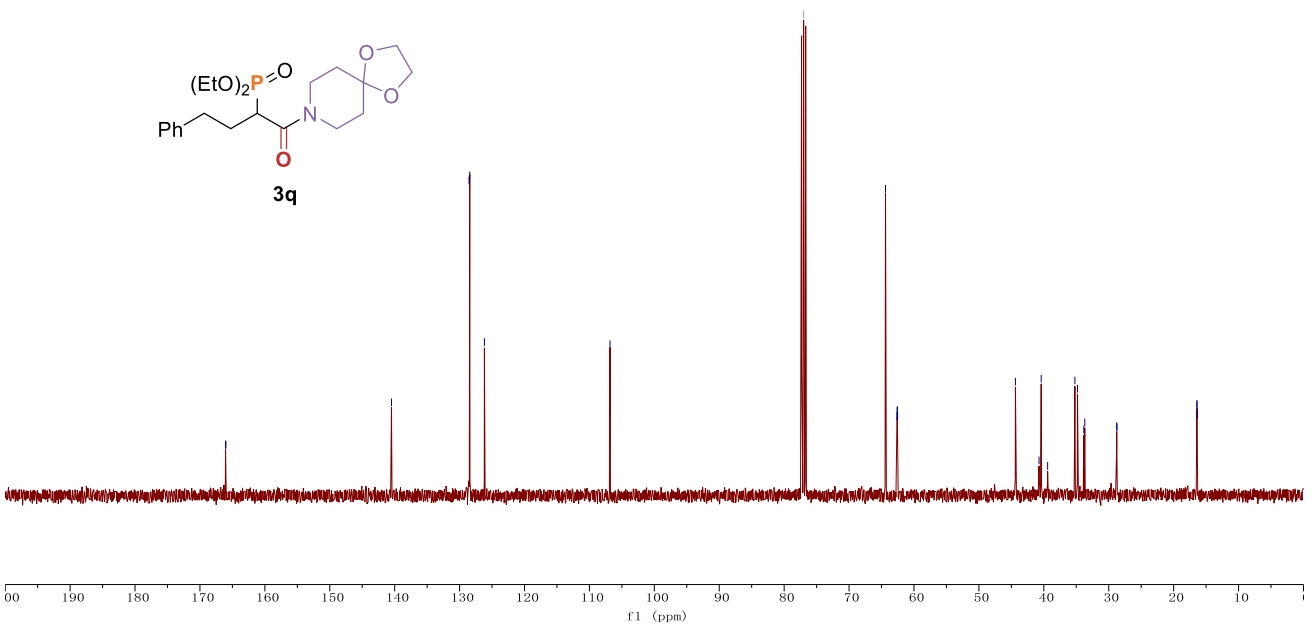

31P NMR CDCl3 161.97MHz

— 24.11

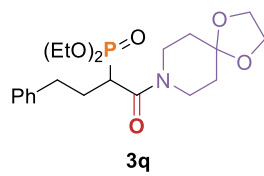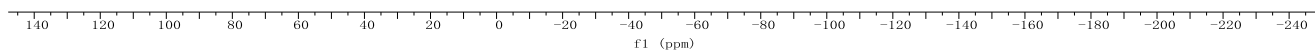



<sup>1</sup>H NMR CDCl<sub>3</sub> 400.13MHz

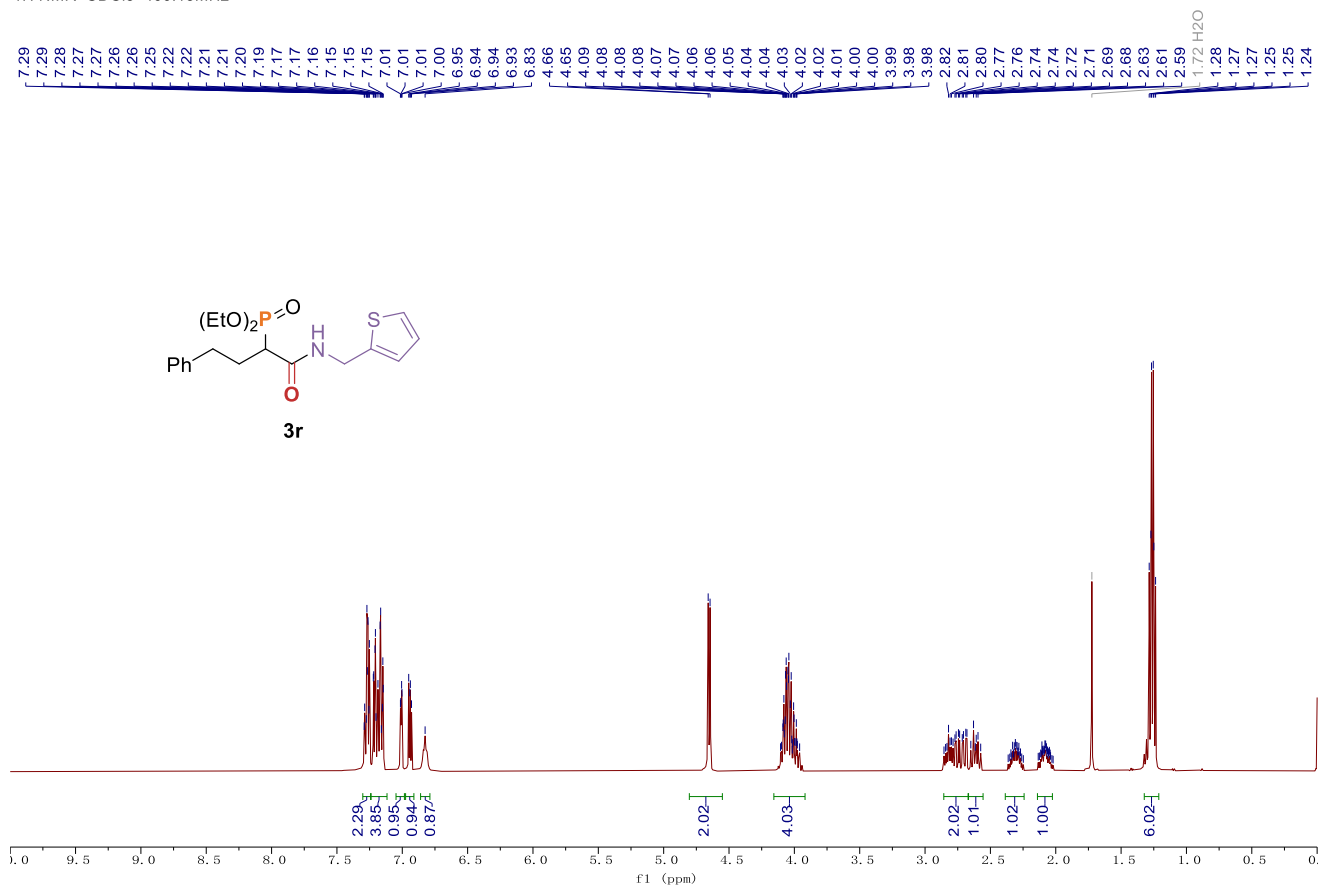

<sup>13</sup>C NMR CDCl<sub>3</sub> 100.62MHz

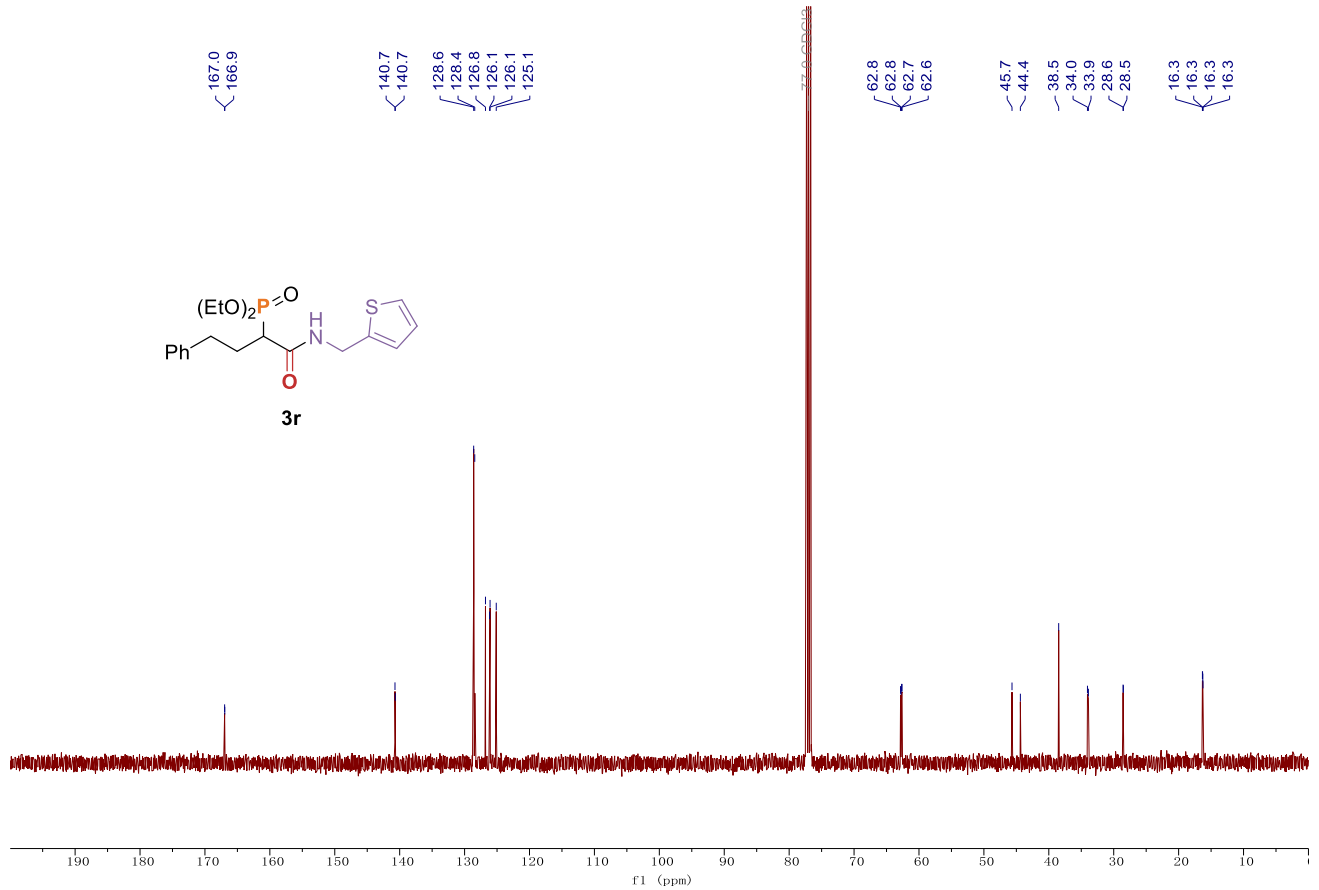

31P NMR CDCl3 161.97MHz

25.25

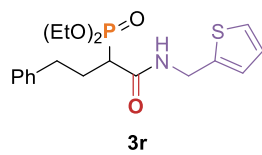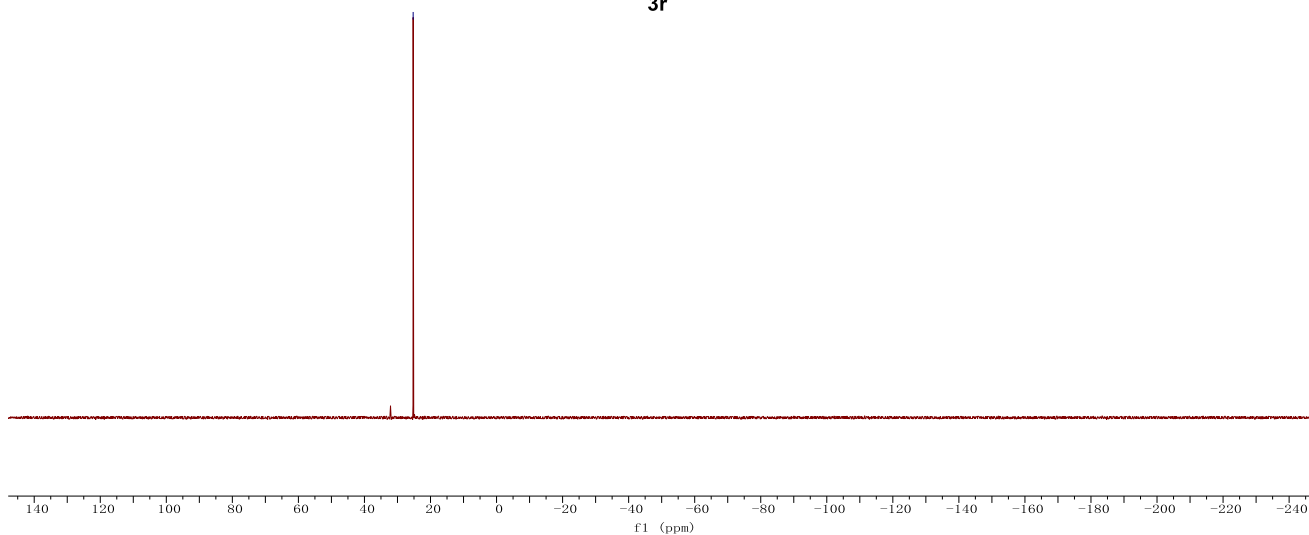

1H NMR CDCl3 400.13MHz

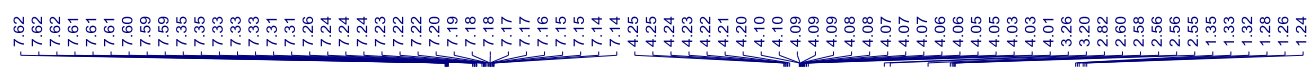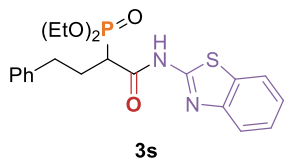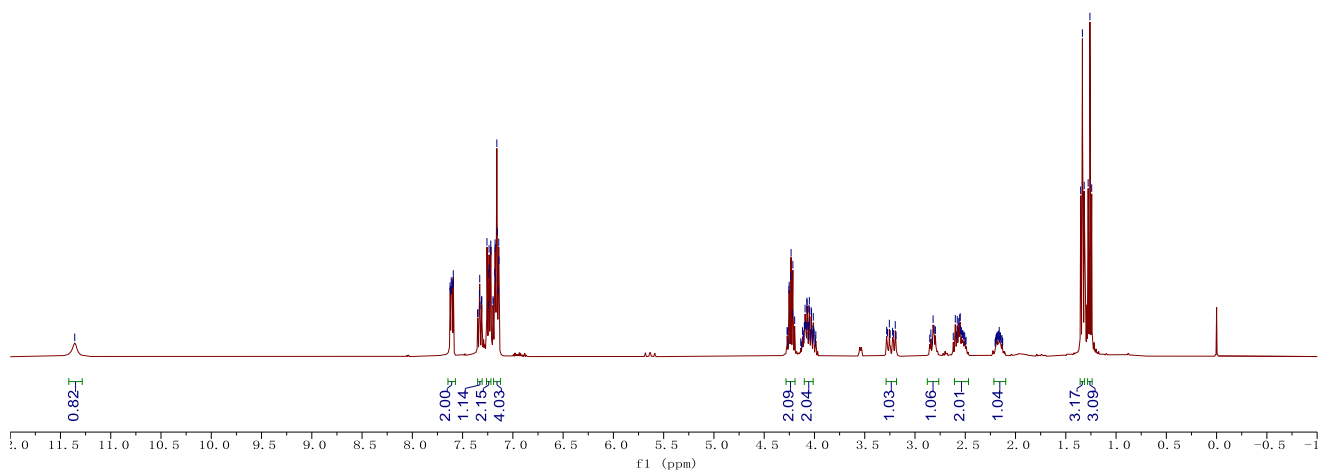

13C NMR CDCl3 100.62MHz

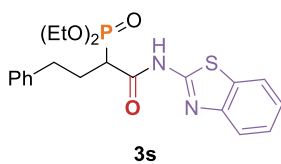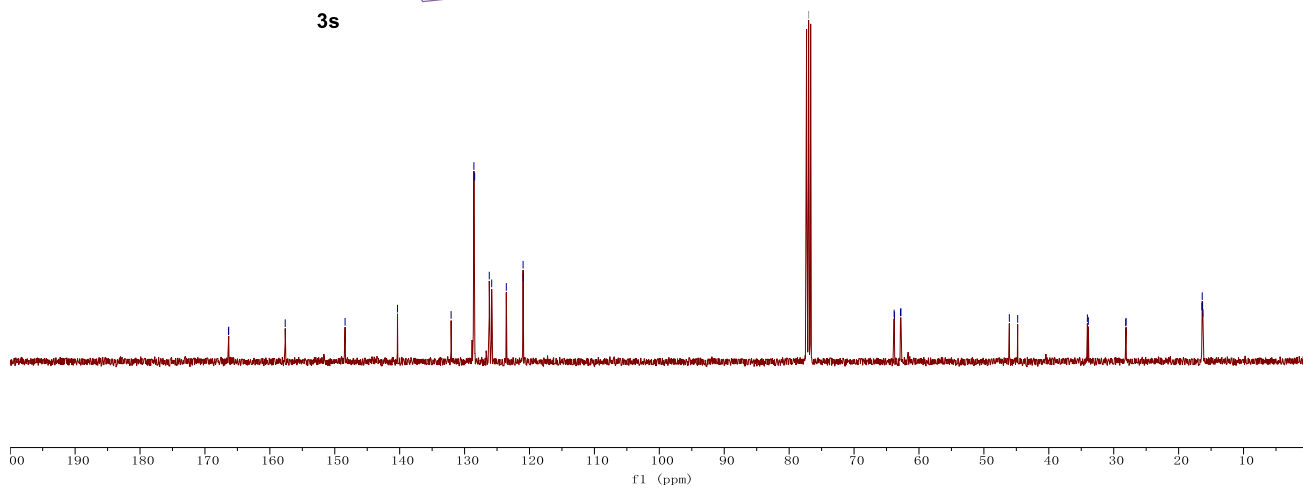

31P NMR CDCl3 161.97MHz

— 22.98

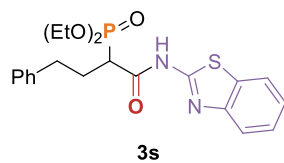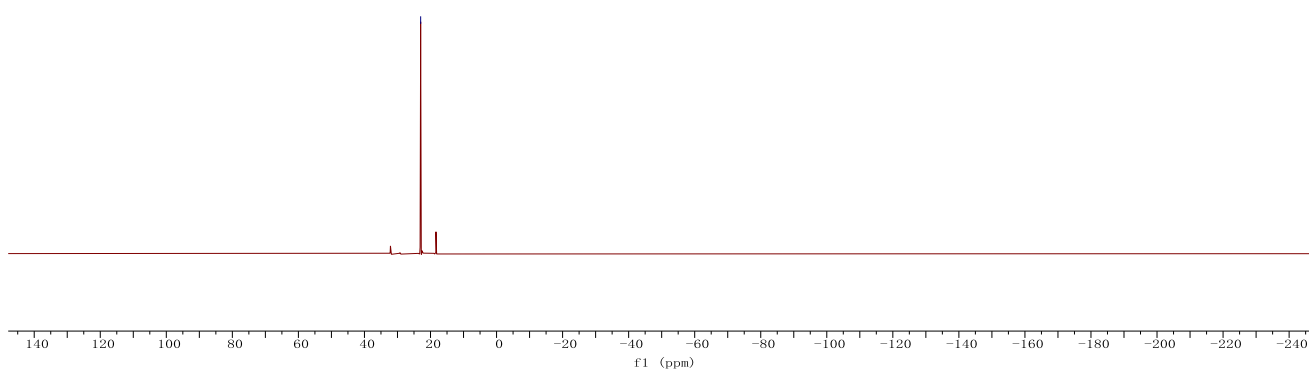

1H NMR CDCl3 400.13MHz

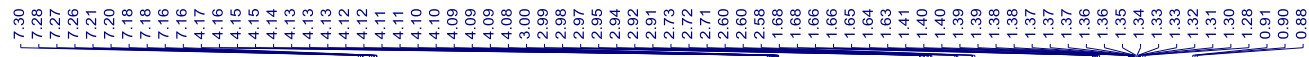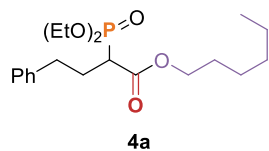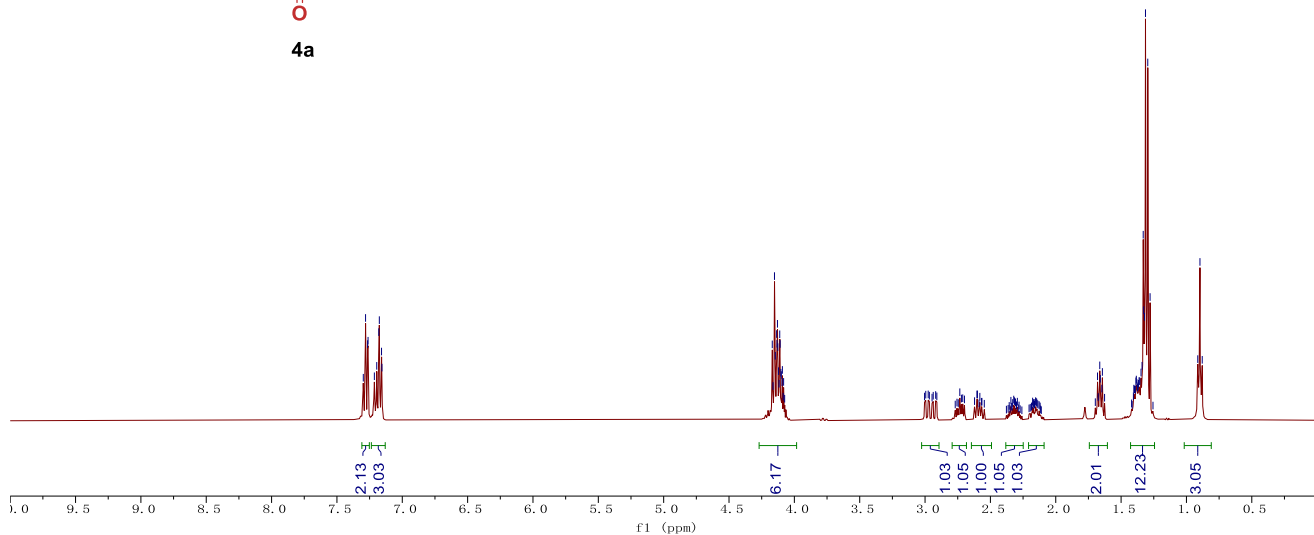

13C NMR CDCl3 100.62MHz

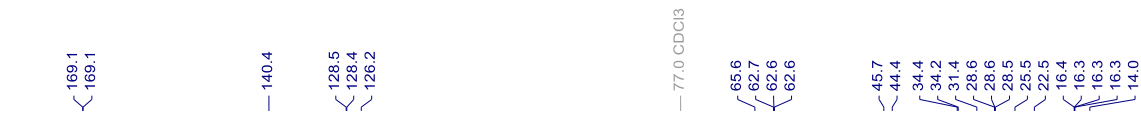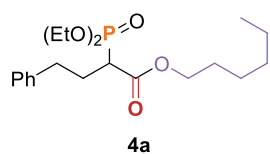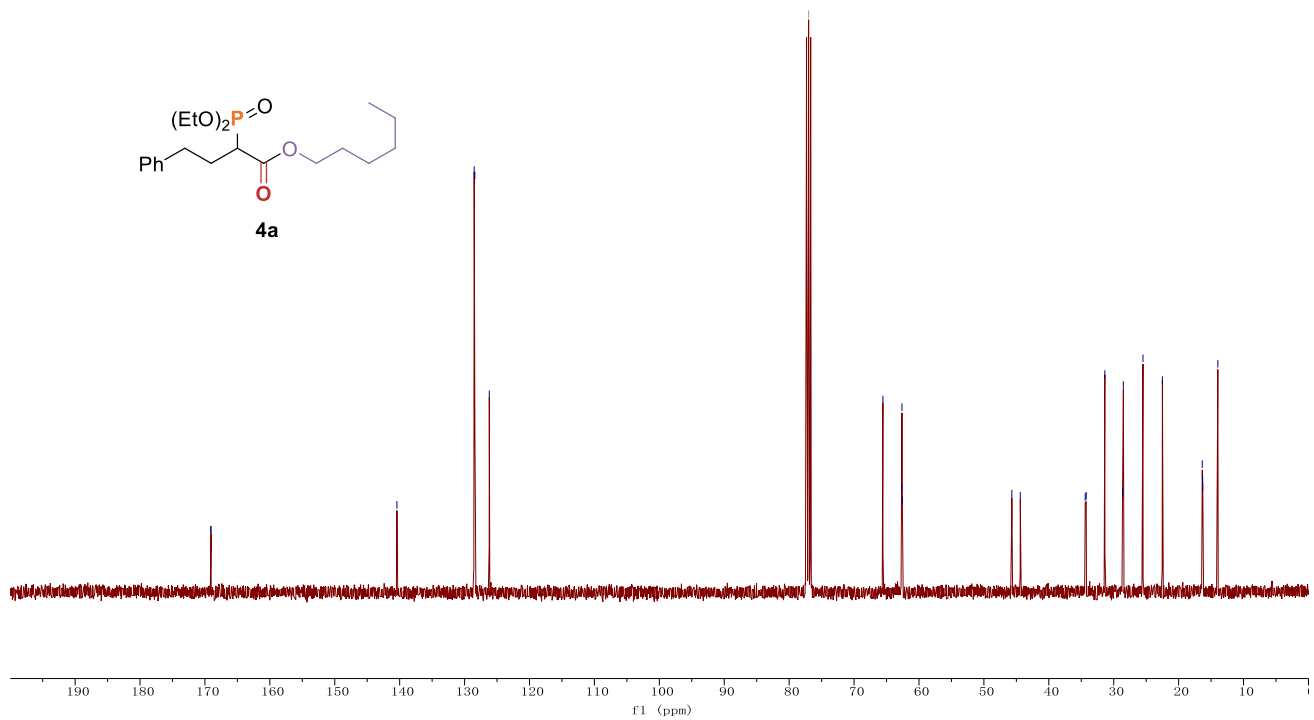

1H NMR CDCl3 161.97MHz

— 22.61

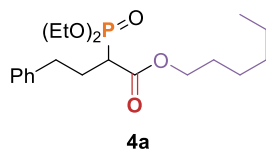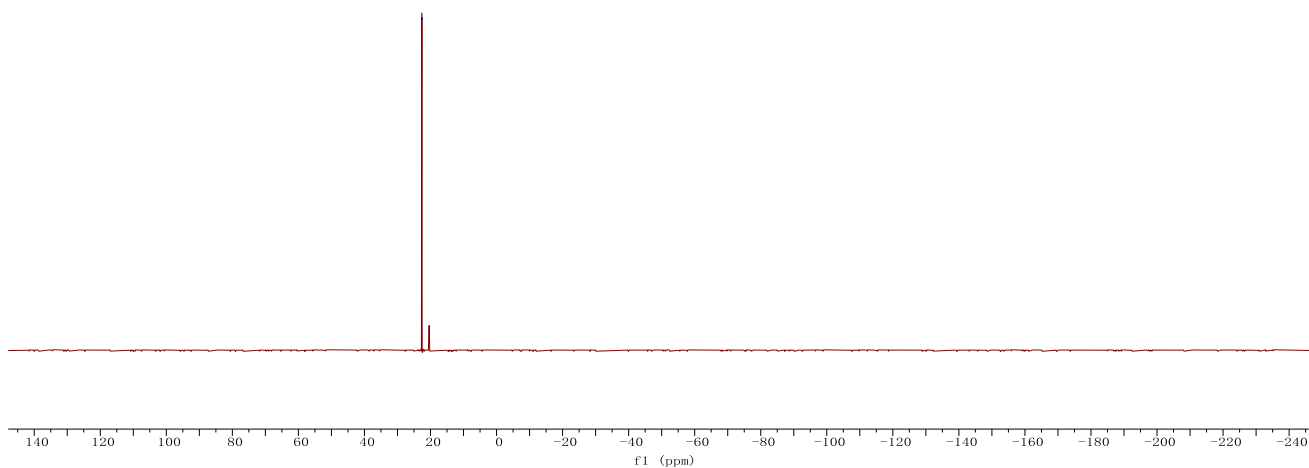

1H NMR CDCl3 400.13MHz

7.30  
7.29  
7.28  
7.28  
7.27  
7.26  
7.21  
7.19  
7.18  
7.16  
7.16  
4.17  
4.15  
4.14  
4.14  
4.13  
4.13  
4.12  
4.12  
4.11  
4.11  
4.10  
4.10  
4.09  
4.09  
4.09  
4.07  
4.07  
3.00  
2.99  
2.98  
2.97  
2.95  
2.94  
2.92  
2.92  
2.91  
2.91  
2.73  
2.72  
2.71  
2.70  
2.60  
2.60  
2.58  
2.57  
2.56  
2.32  
1.68  
1.66  
1.64  
1.63  
1.63  
1.39  
1.38  
1.37  
1.35  
1.34  
1.33  
1.31  
1.30  
1.29  
1.28  
1.27  
1.26  
0.89  
0.88  
0.86

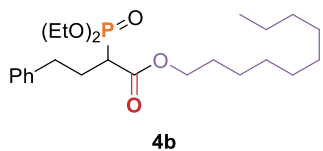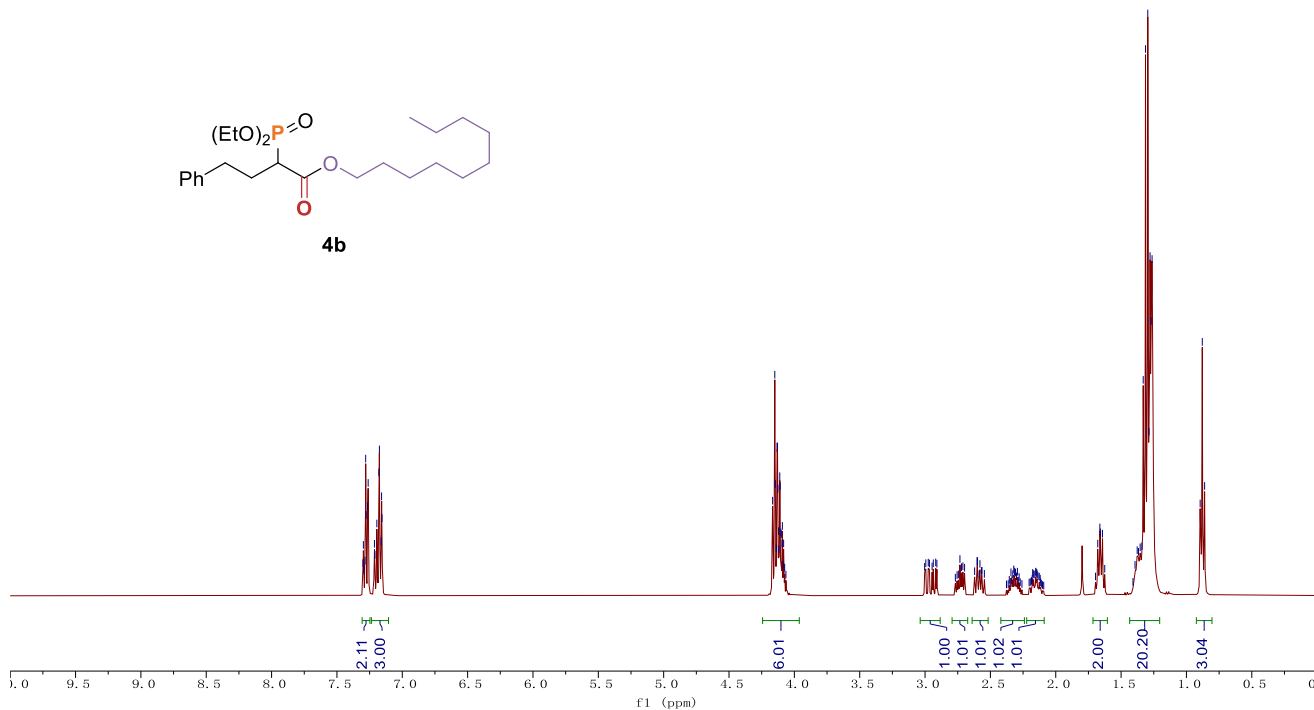

13C NMR CDCl3 100.62MHz

169.1  
169.1  
140.4  
128.5  
128.4  
126.2  
77.0 CDCl3  
65.6  
62.7  
62.6  
62.6  
45.7  
44.4  
34.4  
34.2  
31.8  
29.5  
29.3  
29.2  
28.6  
28.6  
28.6  
28.6  
22.6  
16.4  
16.3  
16.3  
14.1

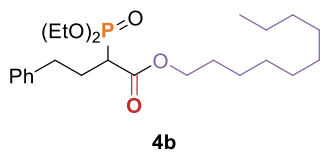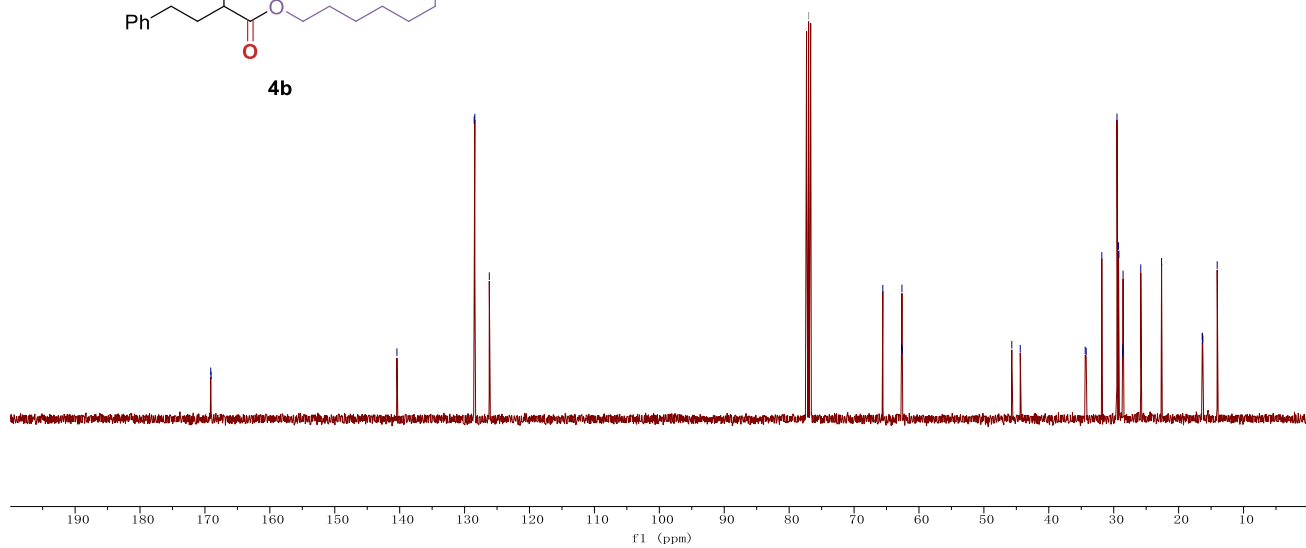

31P NMR CDCl3 161.97MHz

— 22.61

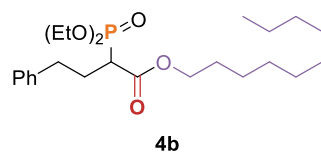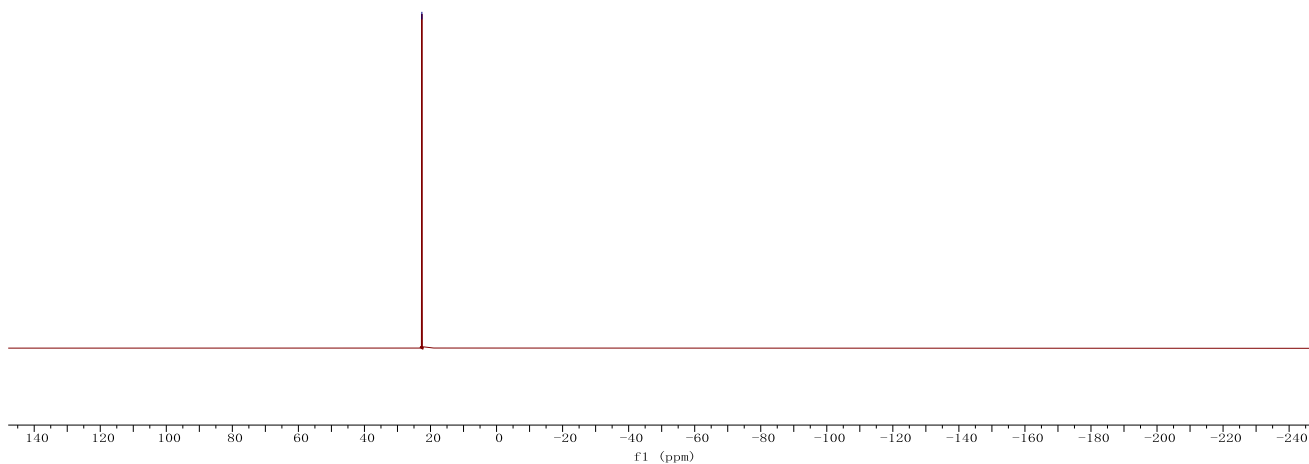



1H NMR CDCl3 400.13MHz

7.30  
7.28  
7.26  
7.21  
7.20  
7.18  
7.16  
7.15  
4.25  
4.24  
4.23  
4.22  
4.21  
4.20  
4.19  
4.16  
4.15  
4.14  
4.14  
4.13  
4.13  
4.12  
4.12  
4.12  
4.11  
4.11  
4.11  
4.10  
4.10  
4.10  
4.09  
4.08  
4.08  
3.00  
2.99  
2.97  
2.97  
2.94  
2.94  
2.92  
2.91  
2.91  
2.73  
2.72  
2.71  
2.70  
2.63  
2.61  
2.61  
2.60  
2.59  
2.59  
2.57  
2.55  
2.34  
2.33  
2.32  
2.32  
2.31  
2.30  
2.17  
2.15  
2.15  
2.14  
1.33  
1.32  
1.32  
1.30  
1.30  
1.28  
1.28

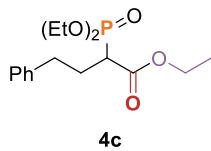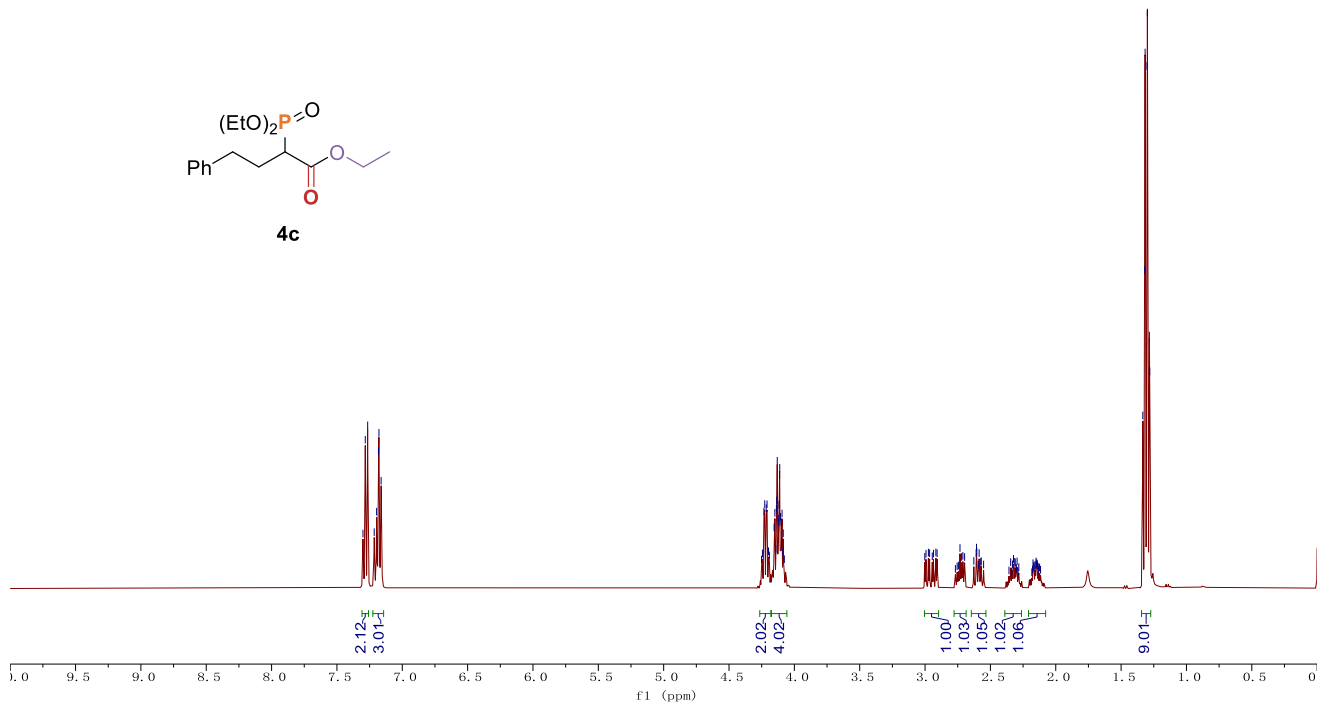

13C NMR CDCl3 100.62MHz

169.0  
169.0  
140.4  
128.5  
128.4  
128.2  
77.0 CDCl3  
62.7  
62.7  
62.6  
62.6  
61.4  
45.7  
44.4  
34.4  
34.2  
28.6  
28.6  
16.4  
16.3  
16.3  
14.1

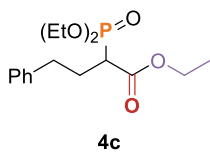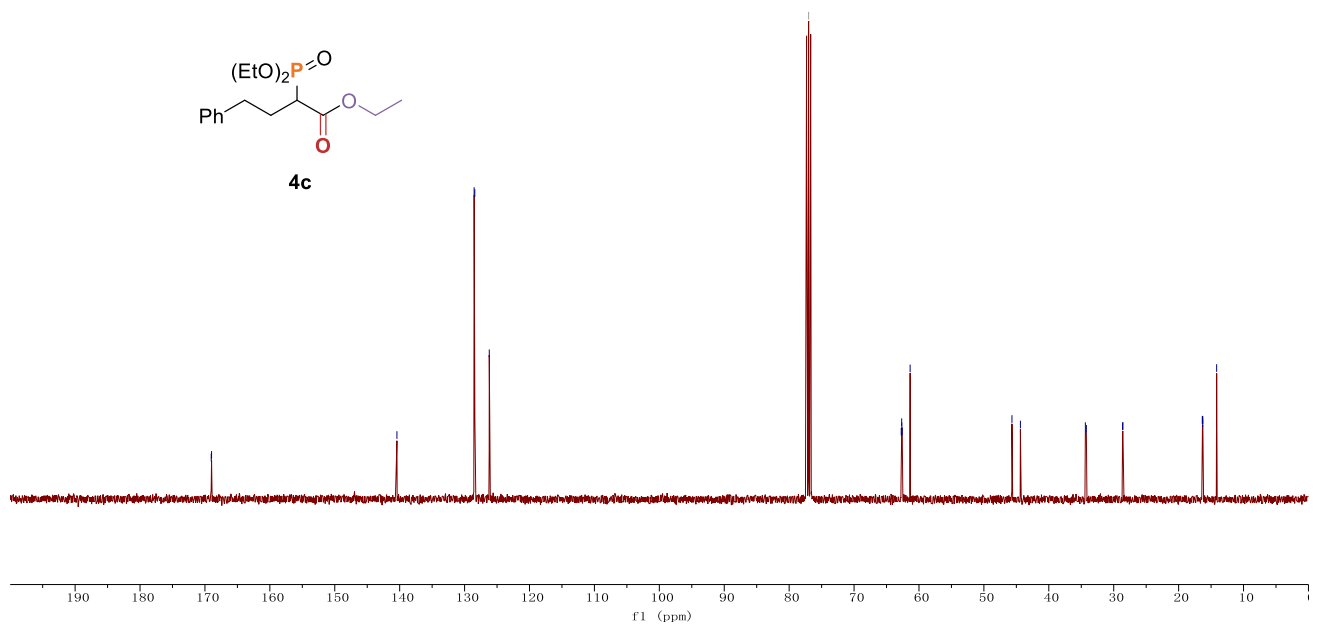

— 22.55

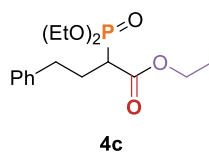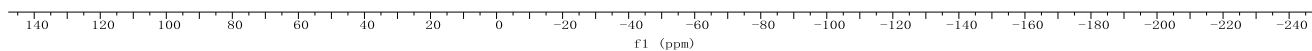

1H NMR CDCl3 400.13MHz

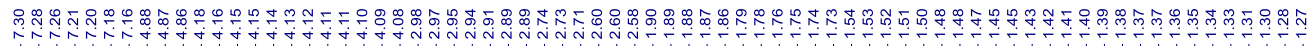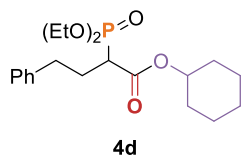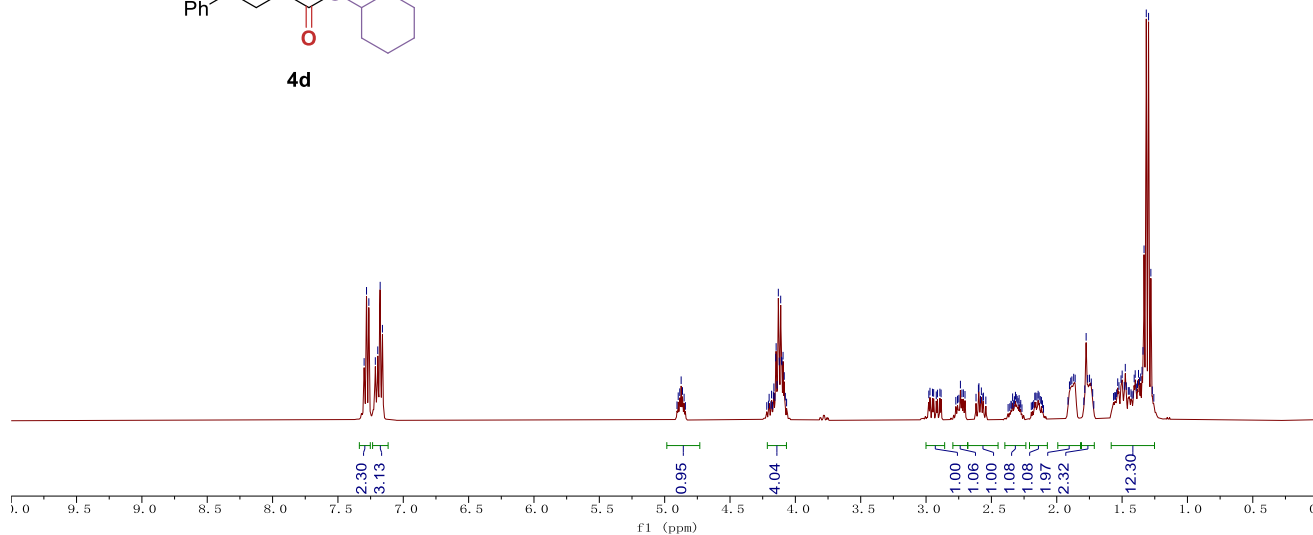

13C NMR CDCl3 100.62MHz

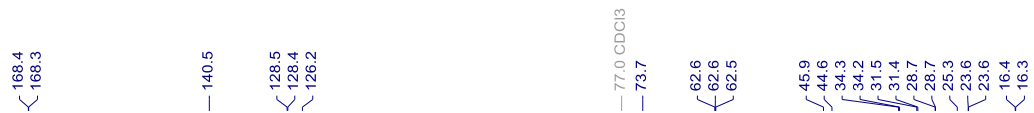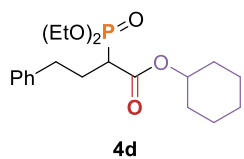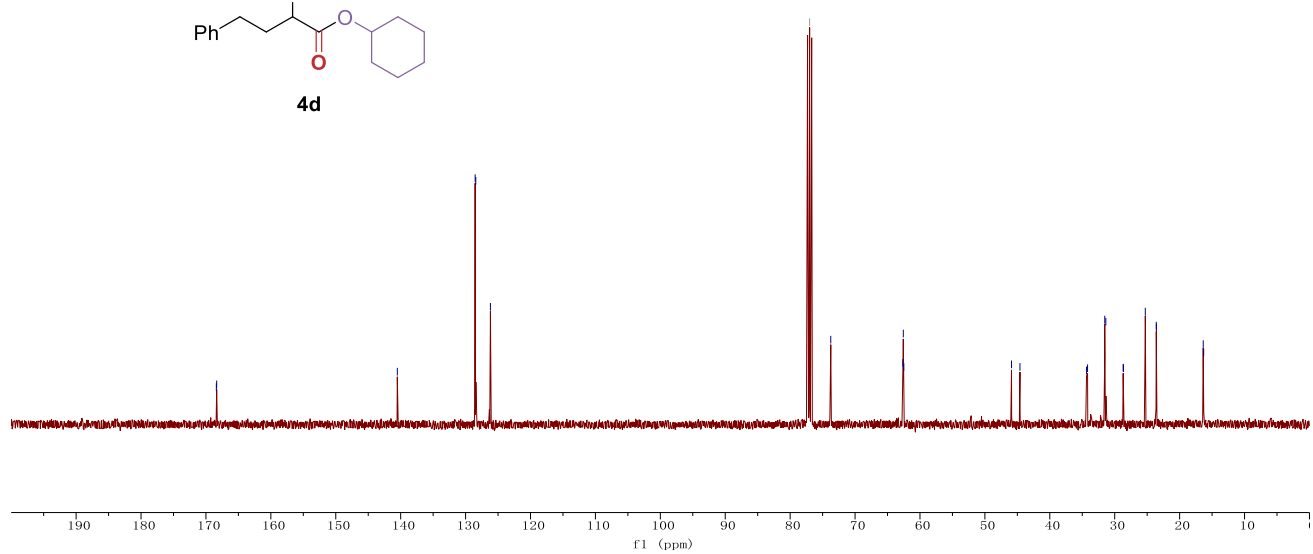

31P NMR CDCl3 161.97MHz

— 22.61

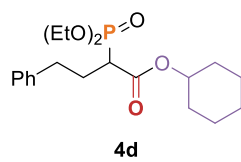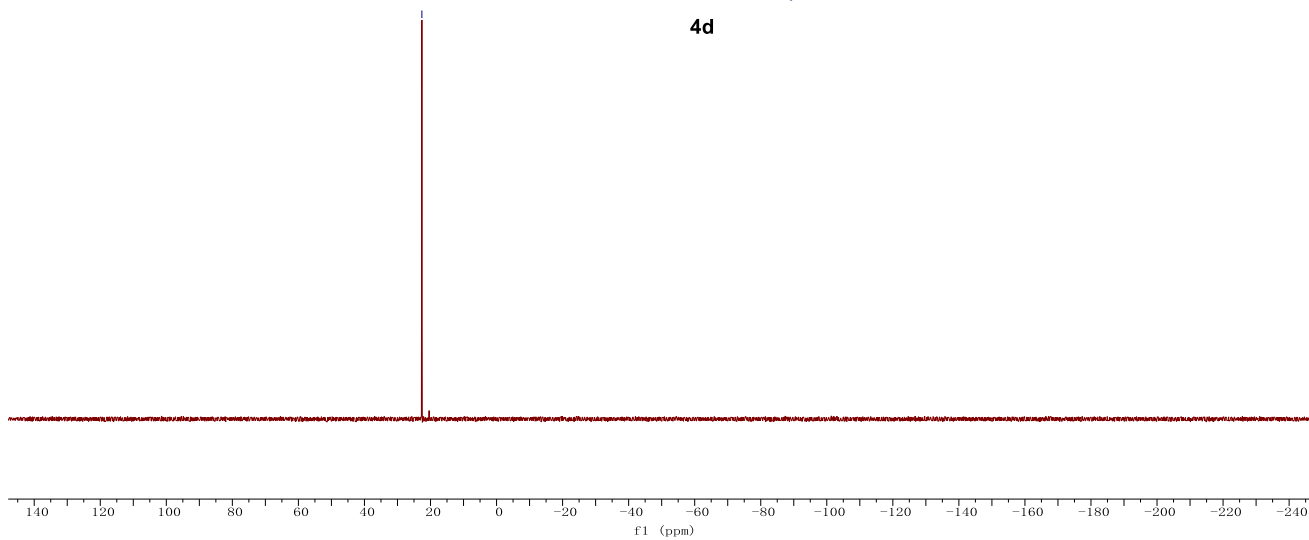

1H NMR CDCl3 400.13MHz

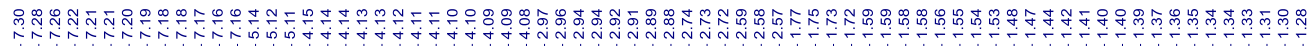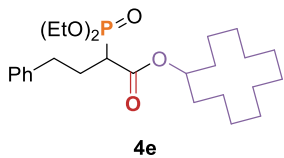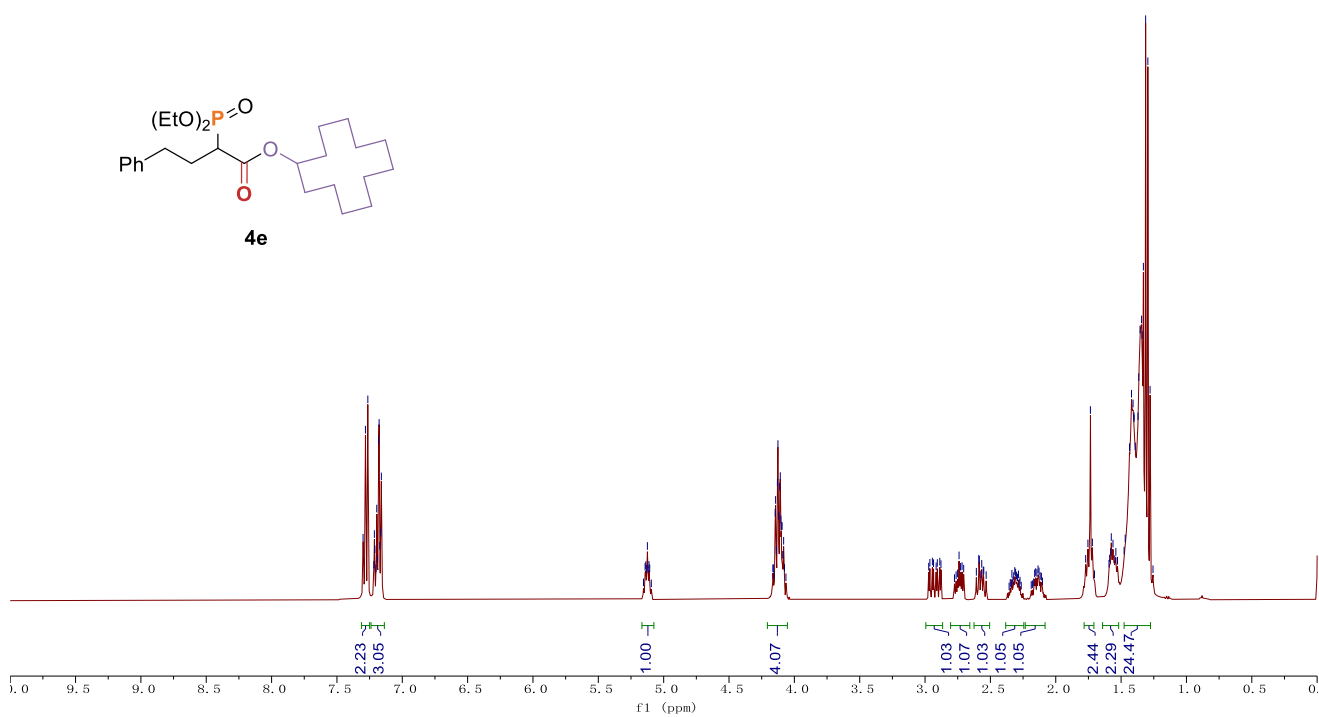

13C NMR CDCl3 100.62MHz

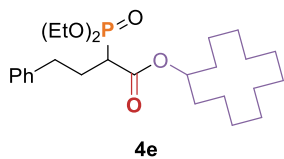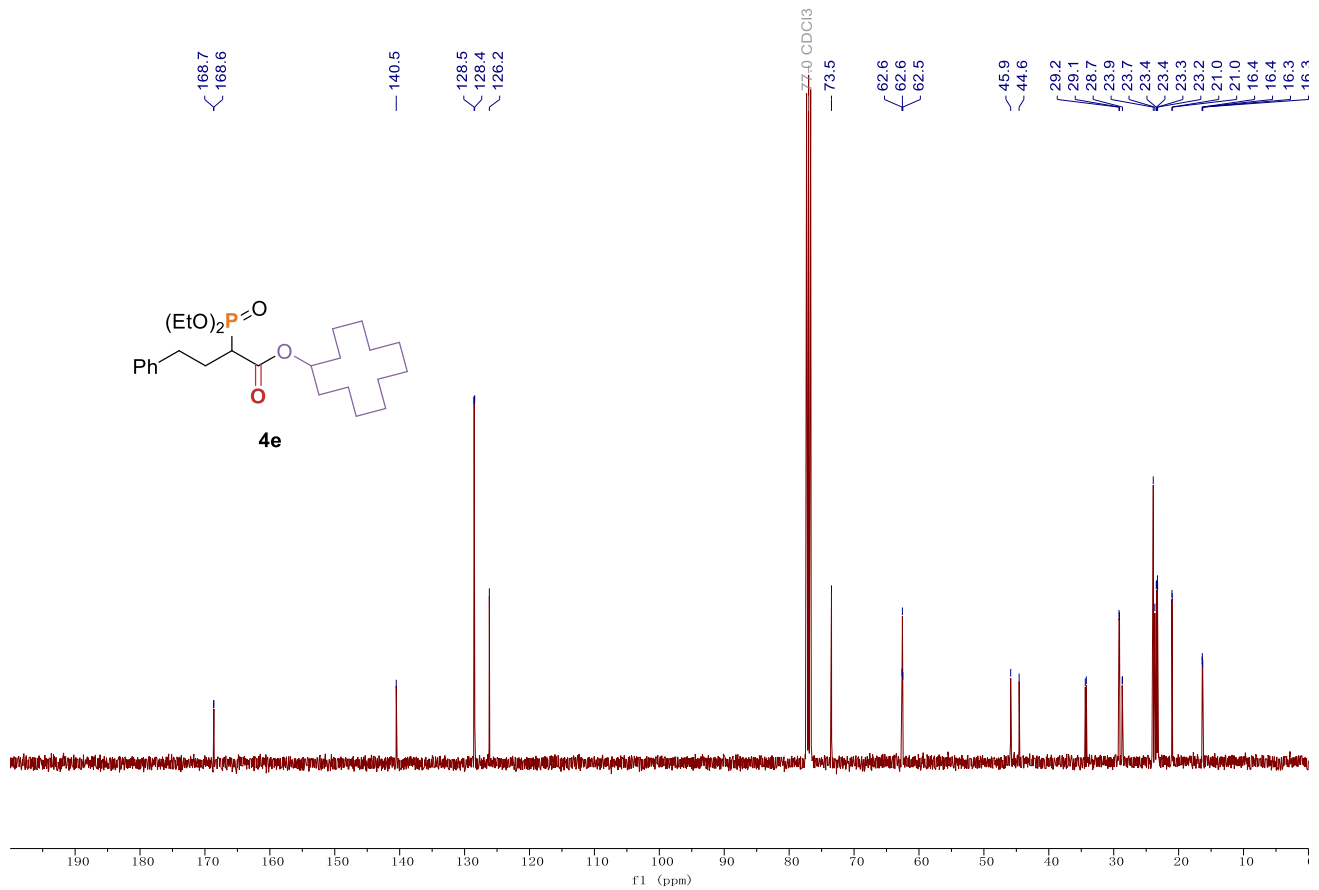

31P NMR CDCl3 161.97MHz

— 22.87

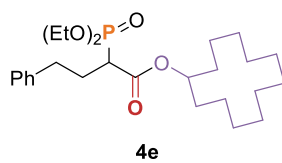

1H NMR CDCl3 400.13MHz

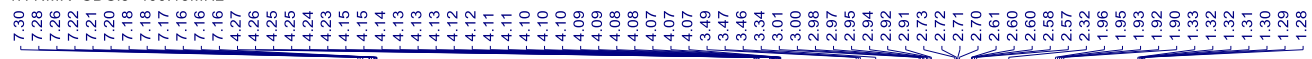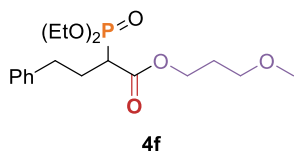

13C NMR CDCl3 100.62MHz

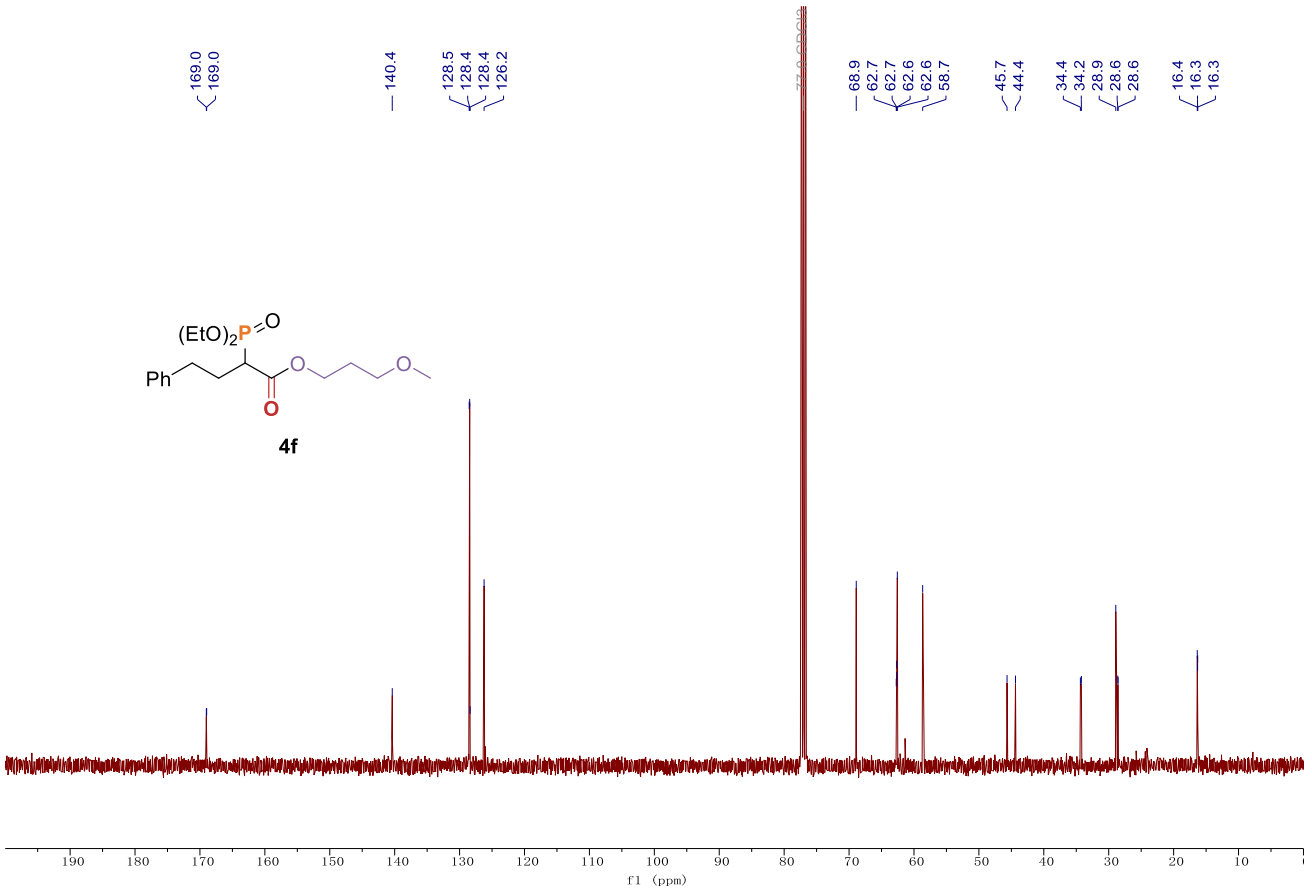

31P NMR CDCl3 161.97MHz

— 22.52

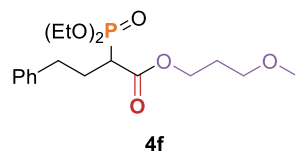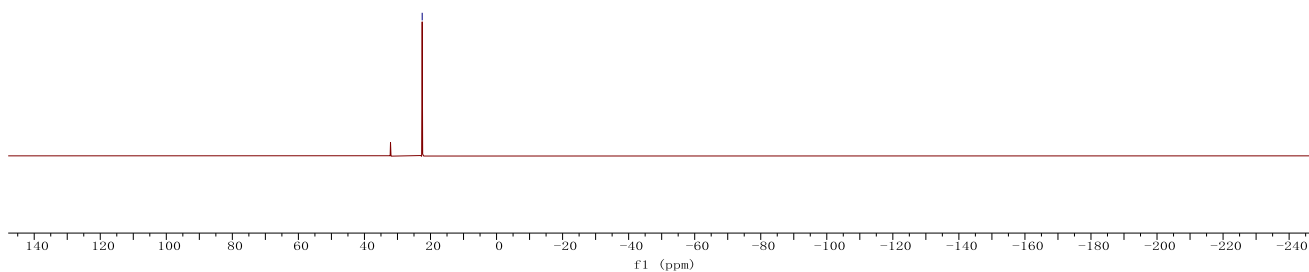



1H NMR CDCl3 400.13MHz

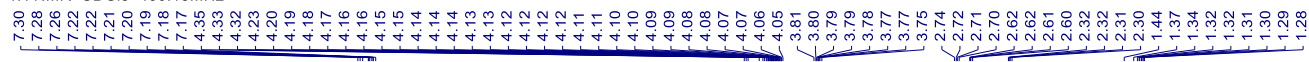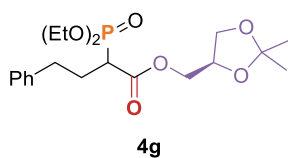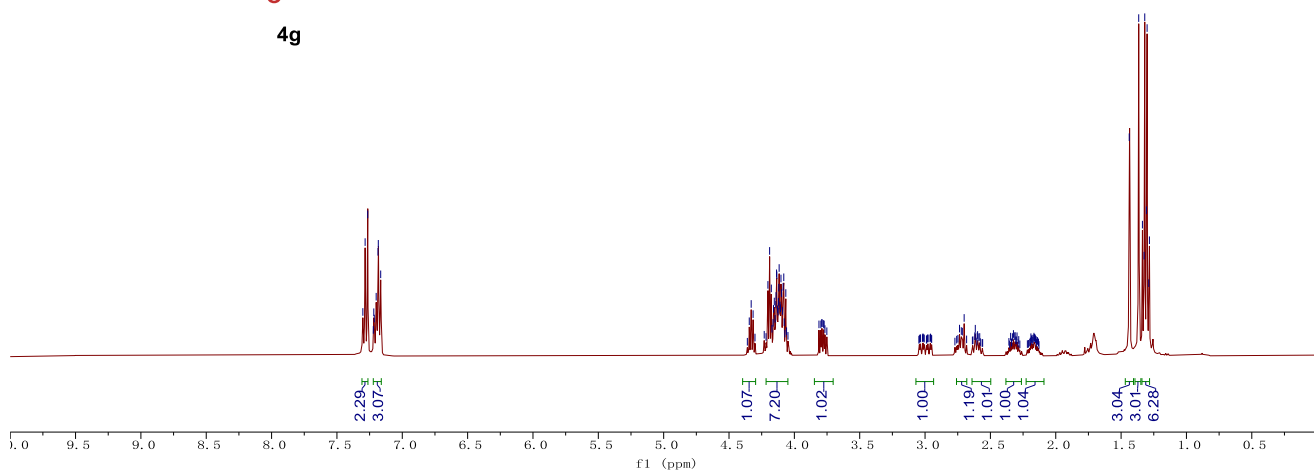

13C NMR CDCl3 100.62MHz

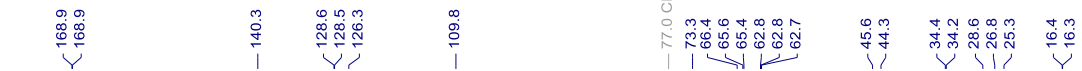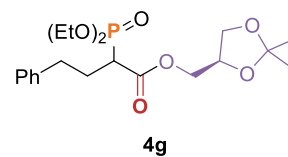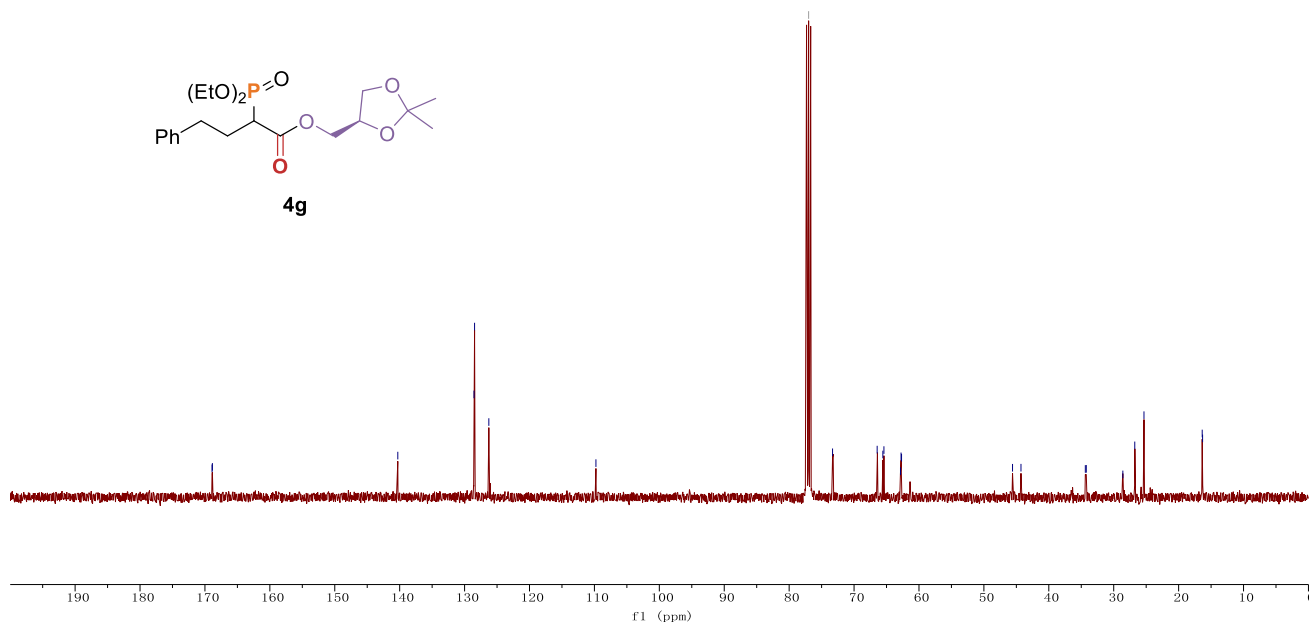

— 22.11

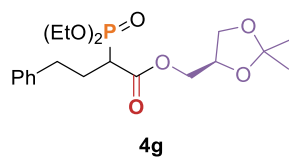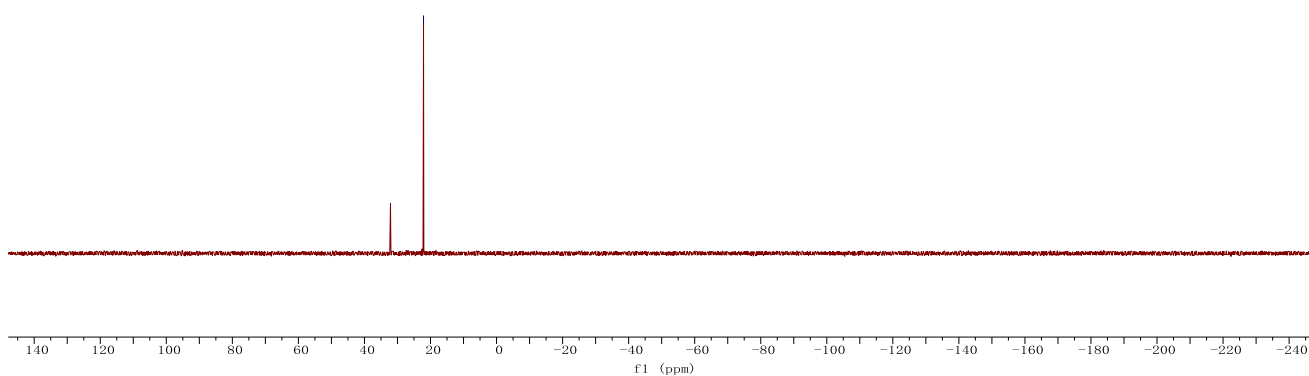

1H NMR CDCl3 400.13MHz

7.42  
7.41  
7.41  
7.40  
7.40  
7.39  
7.39  
7.38  
7.37  
7.37  
7.36  
7.35  
7.35  
7.35  
7.34  
7.34  
7.34  
7.33  
7.33  
7.27  
7.26  
7.24  
7.20  
7.18  
7.16  
7.11  
7.09  
5.20  
4.11  
4.10  
4.10  
4.09  
4.08  
4.07  
4.05  
4.05  
4.04  
4.03  
4.03  
3.05  
3.04  
3.02  
3.01  
2.99  
2.98  
2.96  
2.95  
2.95  
2.69  
2.68  
2.67  
2.66  
2.59  
2.57  
2.57  
2.55  
2.54  
2.53  
2.35  
2.33  
2.33  
2.32  
2.31  
2.19  
2.16  
2.16  
1.27  
1.26  
1.25  
1.23

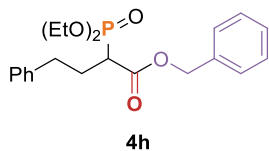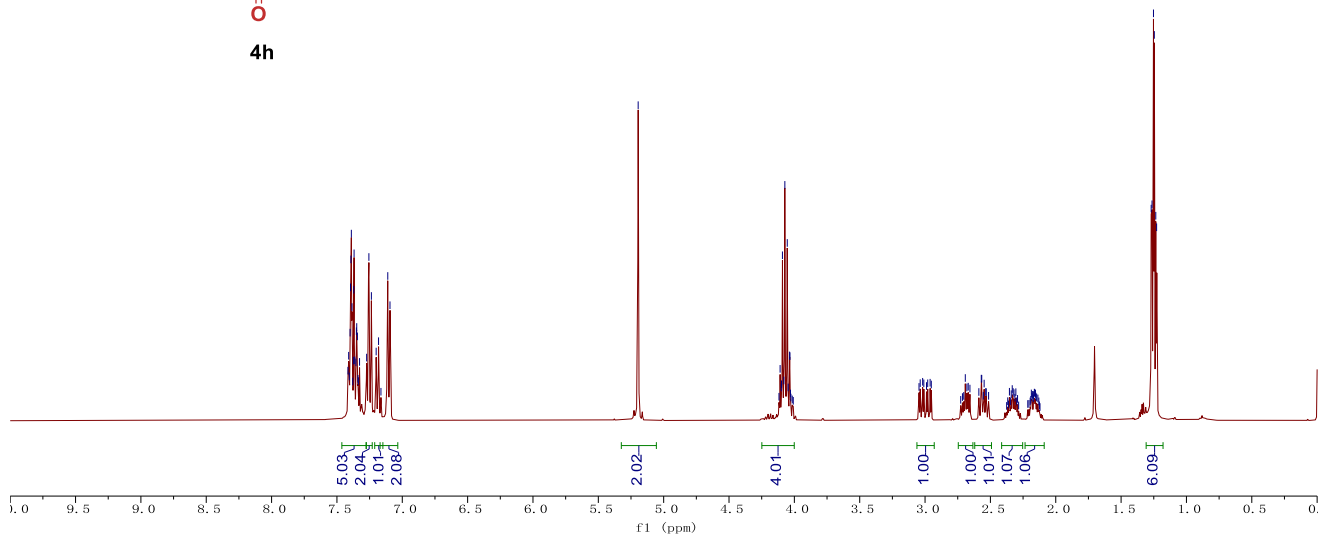

13C NMR CDCl3 100.62MHz

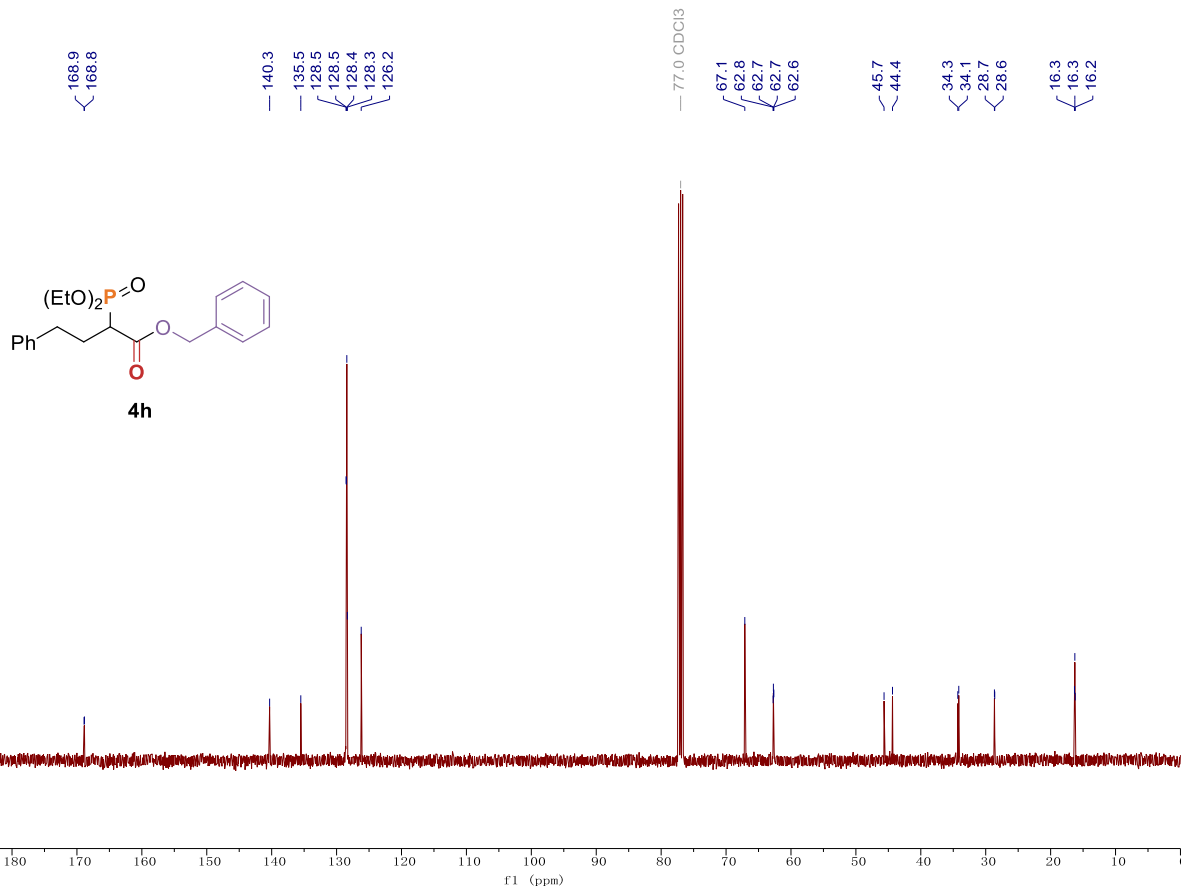

31P NMR CDCl3 161.97MHz

— 22.26

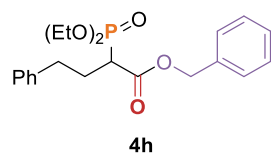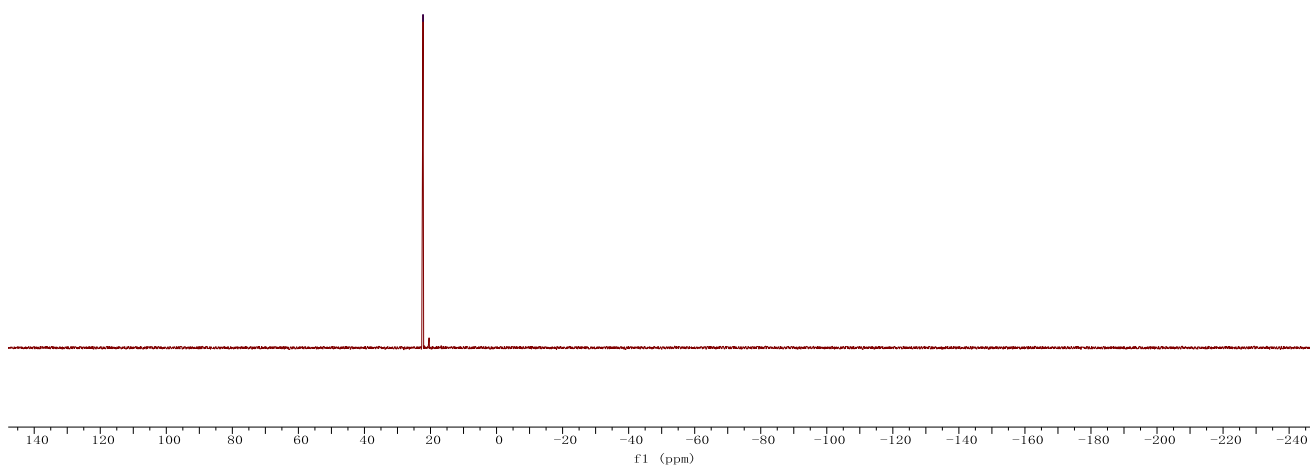

1H NMR CDCl3 400.13MHz

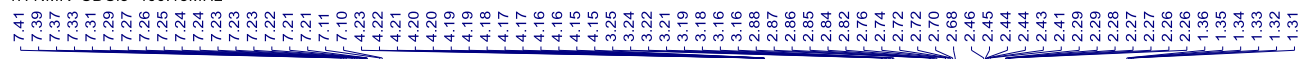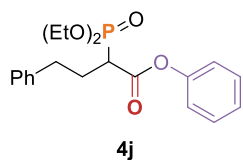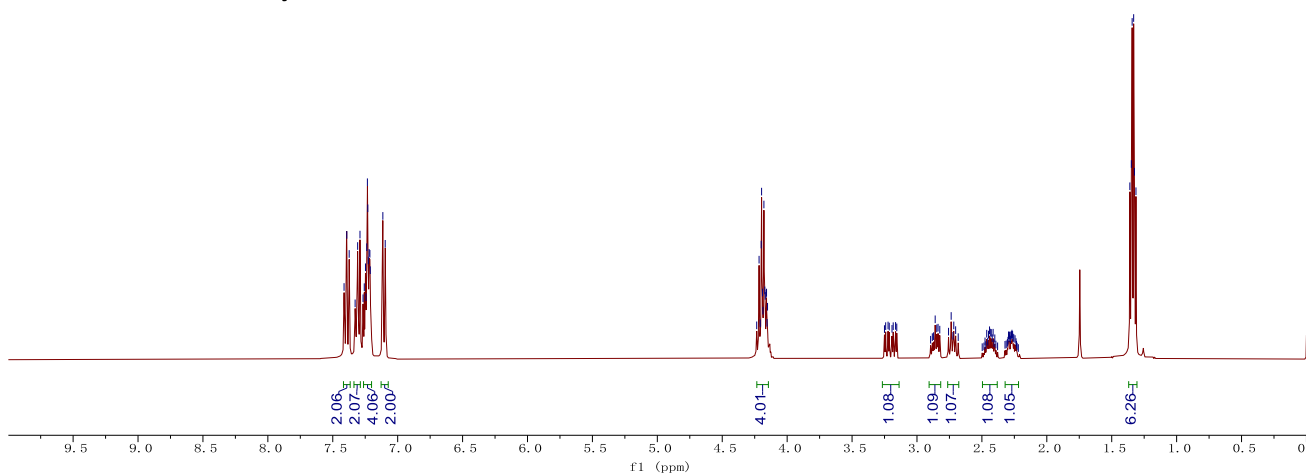

13C NMR CDCl3 100.62MHz

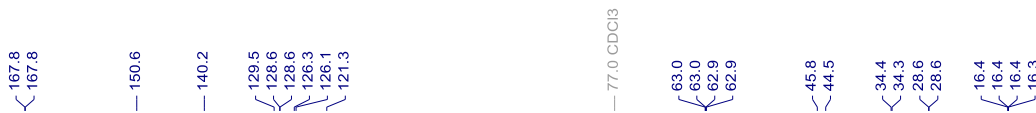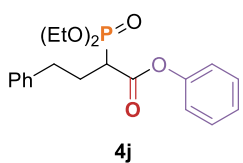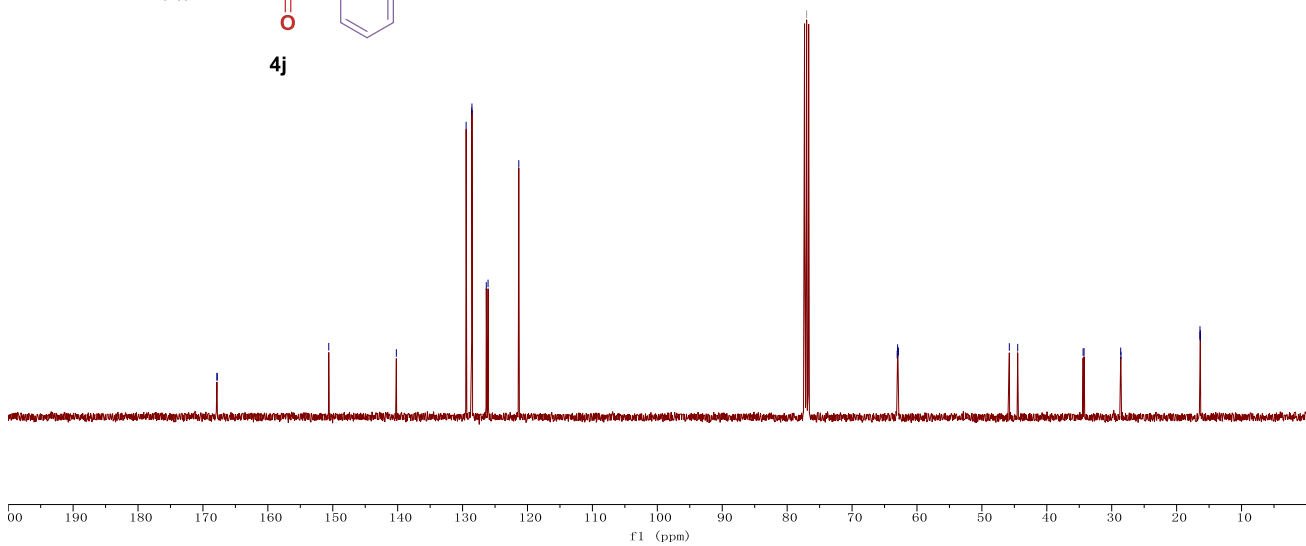

— 21.77

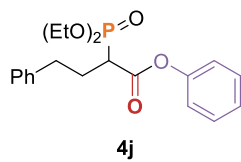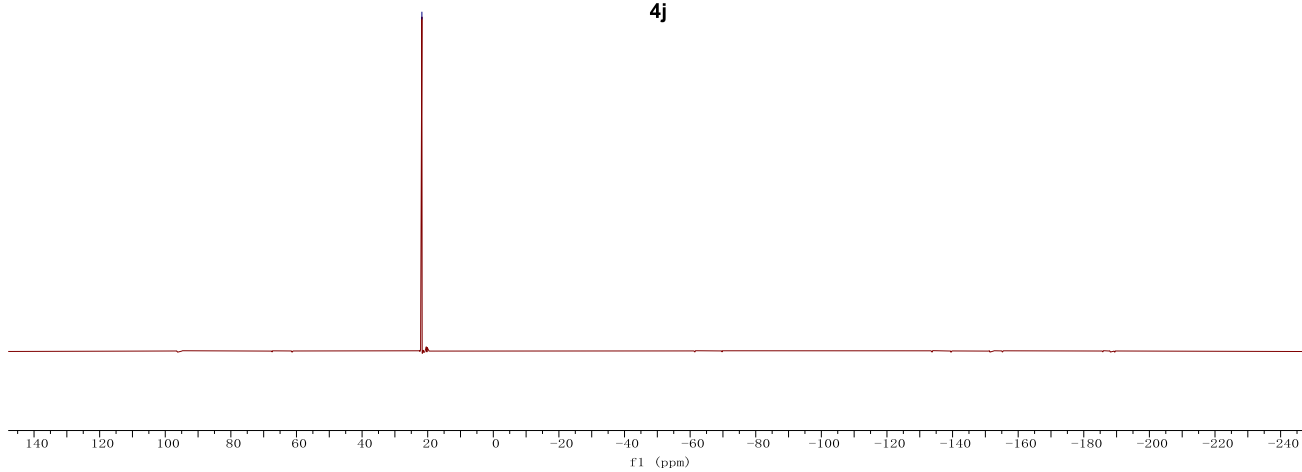

1H NMR CDCl3 400.13MHz

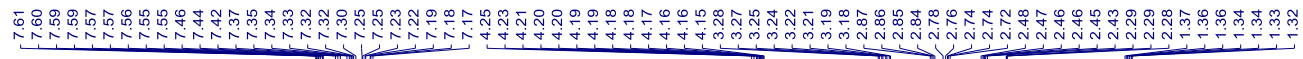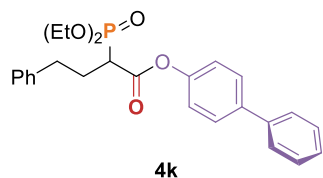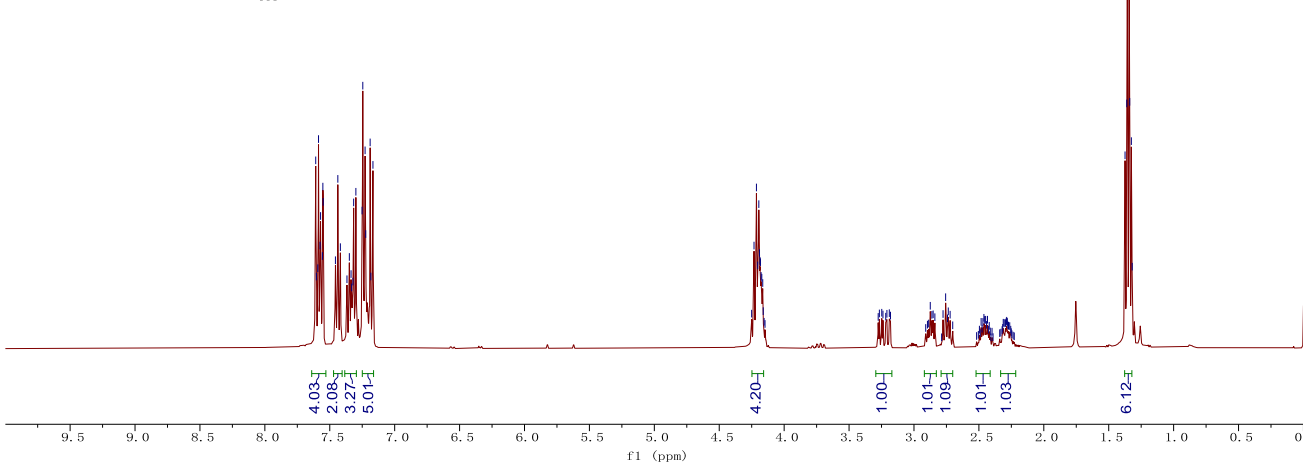

13C NMR CDCl3 100.62MHz

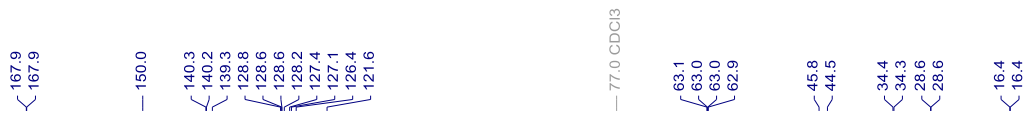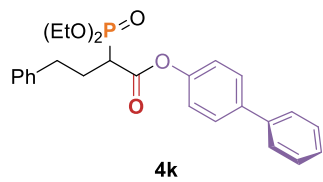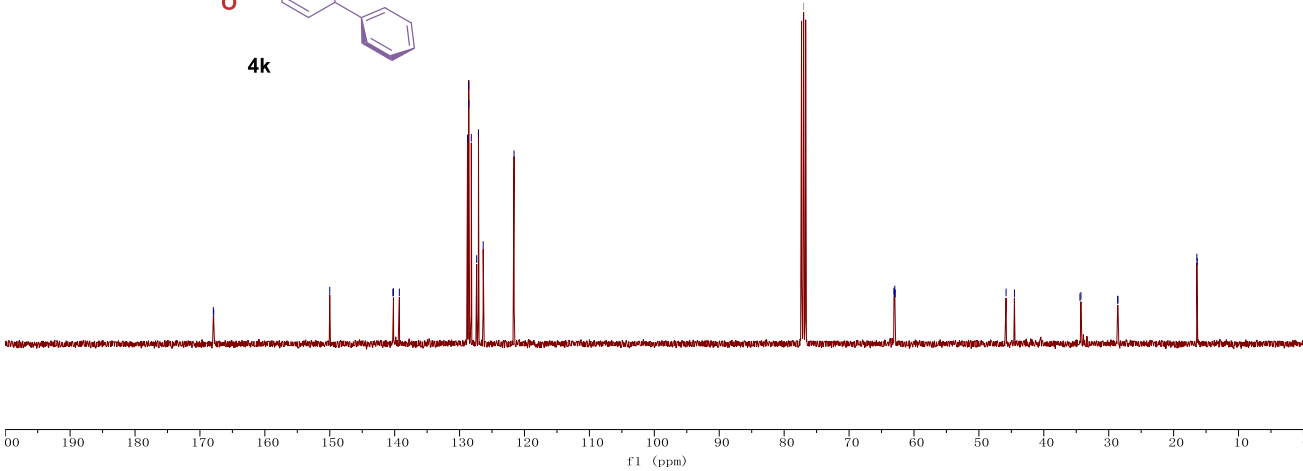

— 21.73

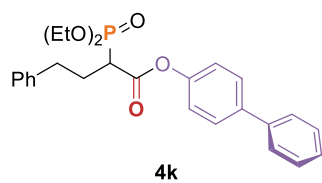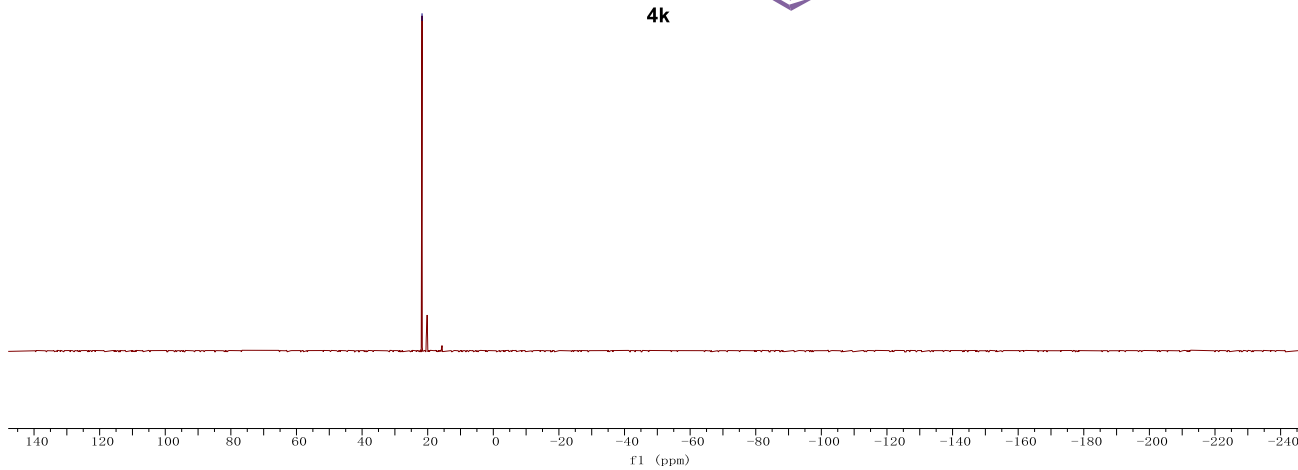



1H NMR CDCl3 400.13MHz

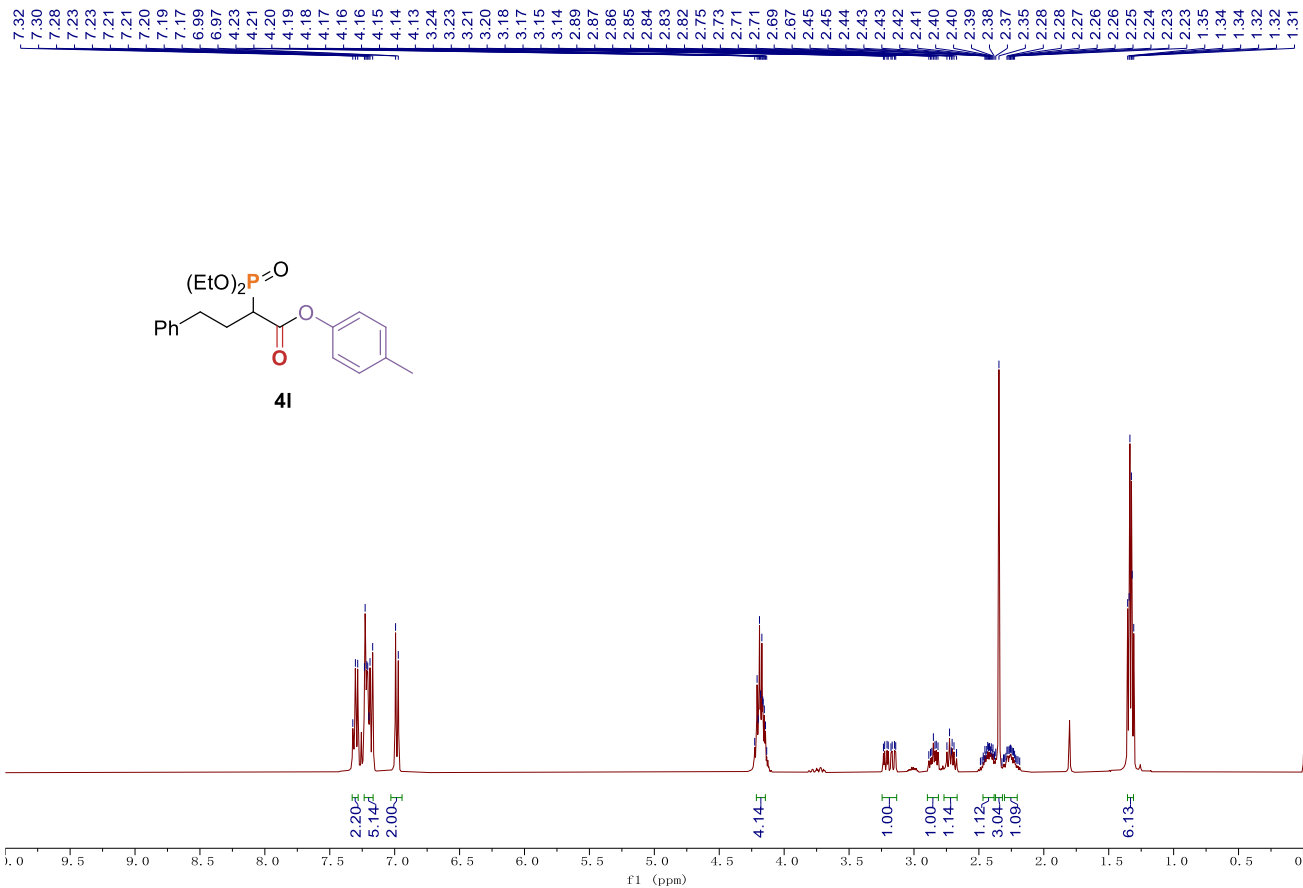

13C NMR CDCl3 100.62MHz

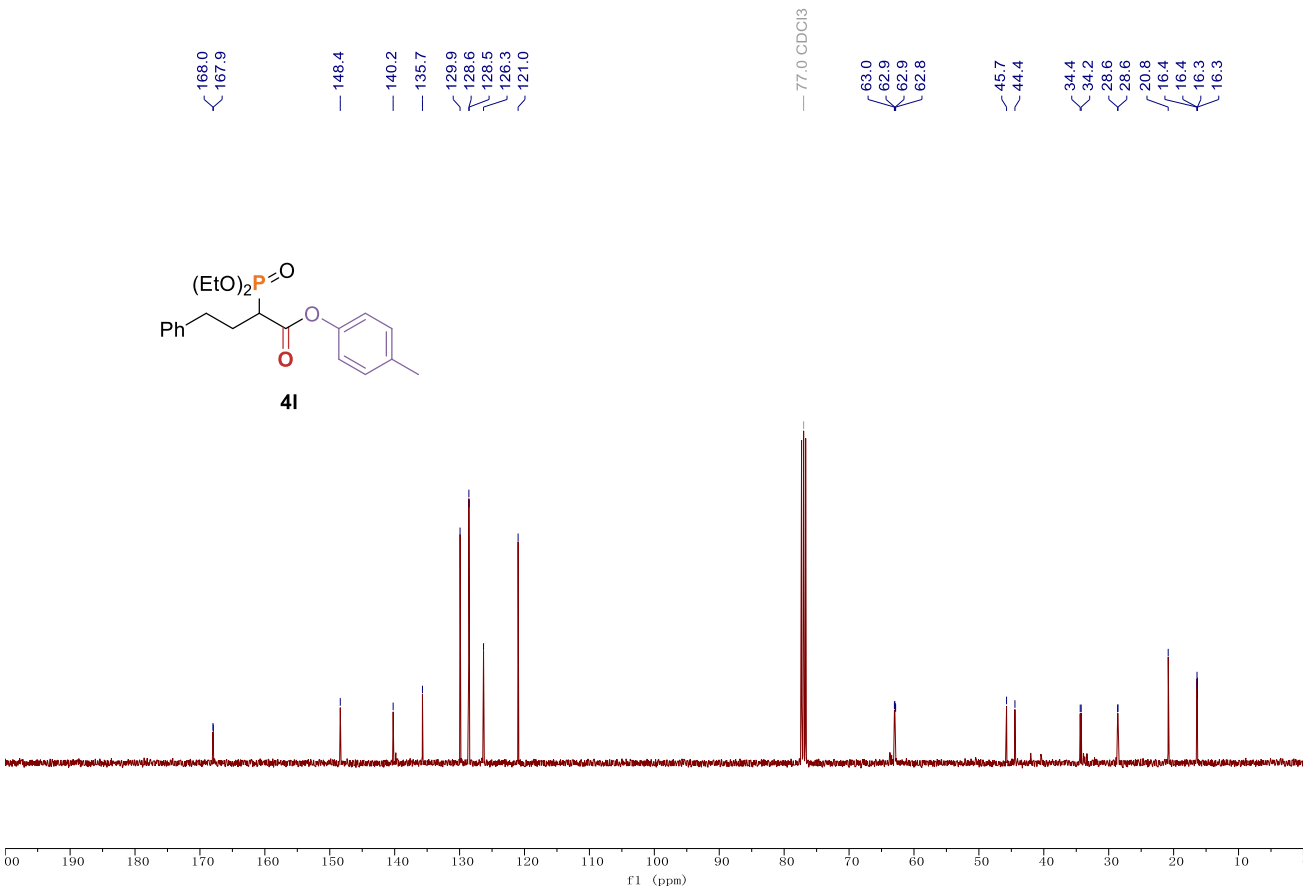

31P NMR CDCl3 161.97MHz

— 21.83

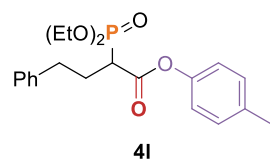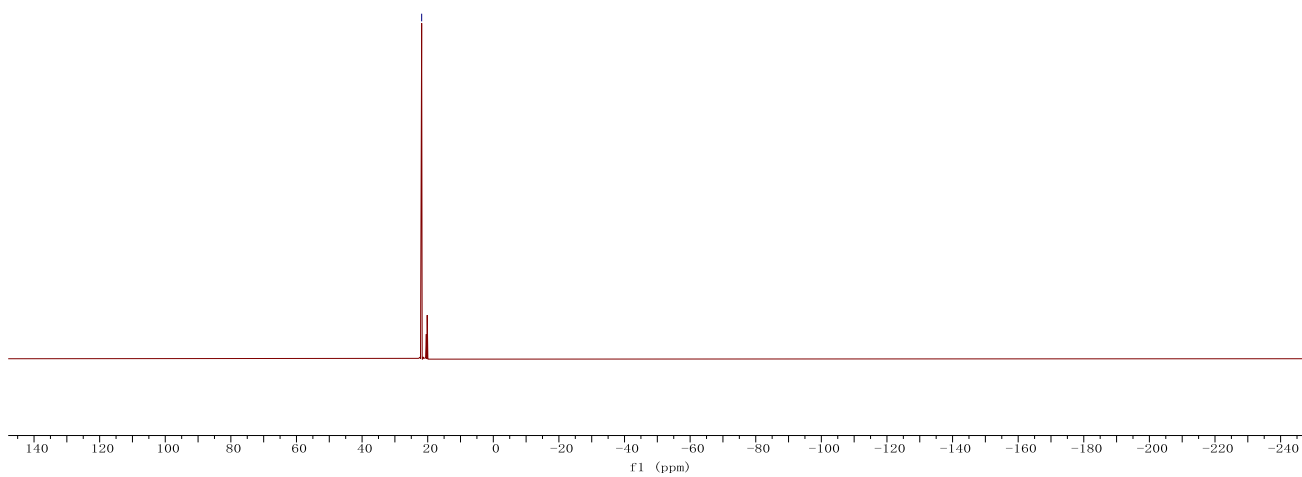

1H NMR CDCl3 400.13MHz

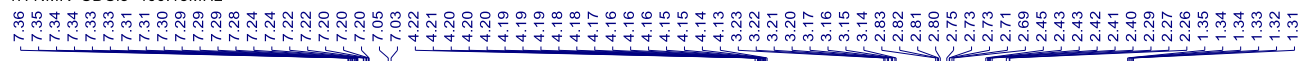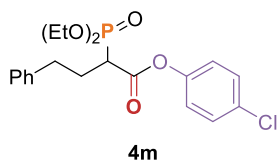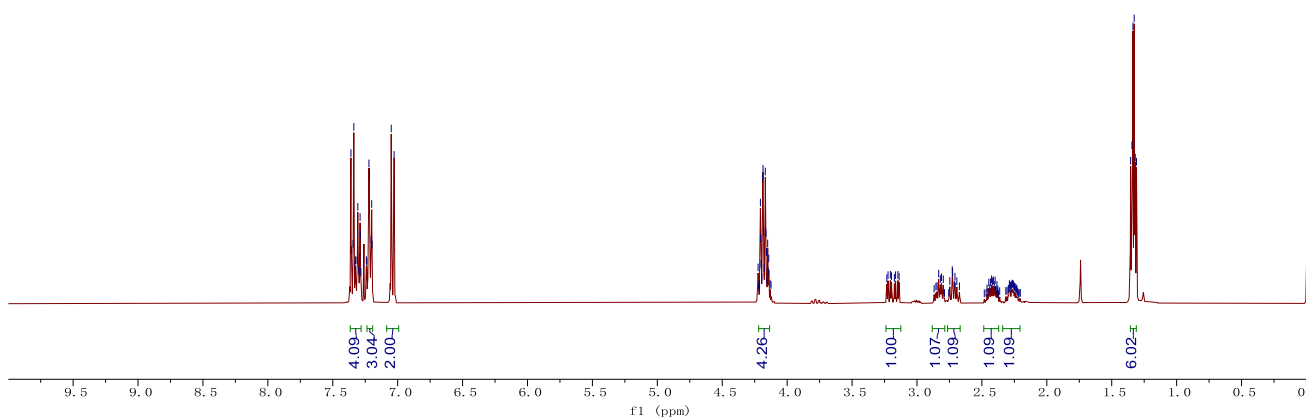

13C NMR CDCl3 100.62MHz

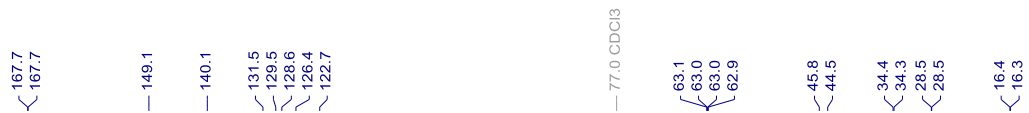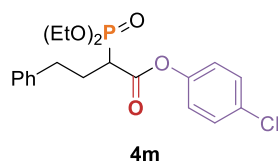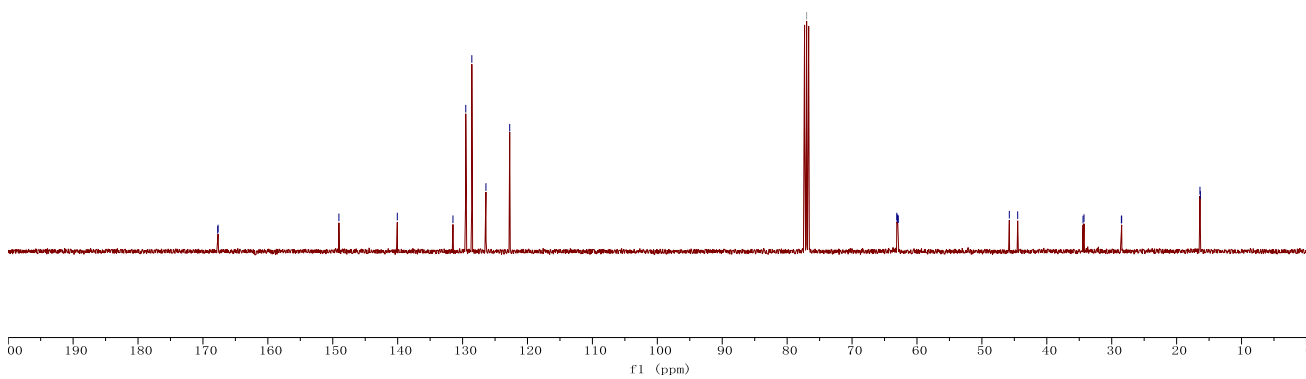

— 21.53

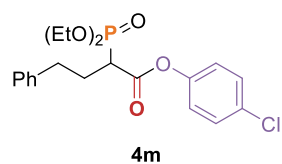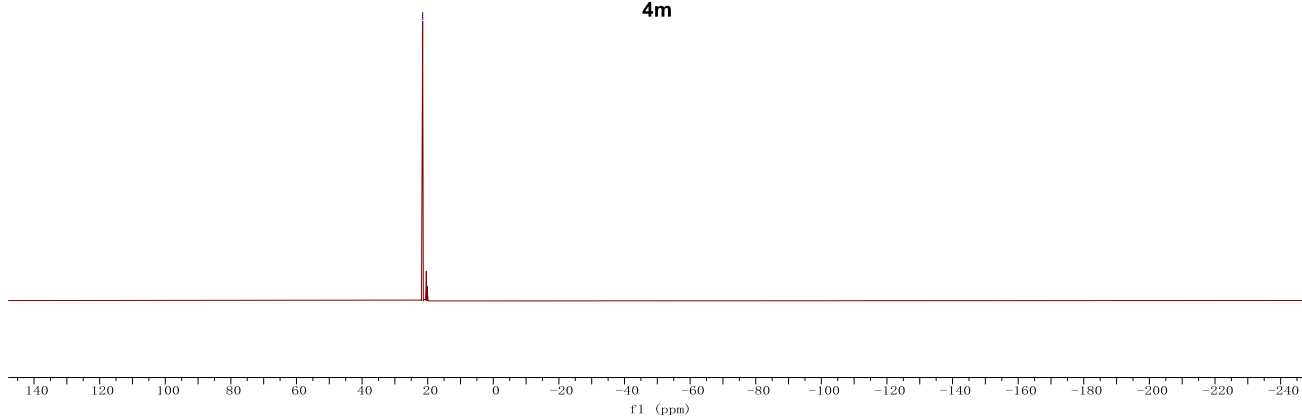

1H NMR CDCl3 400.13MHz

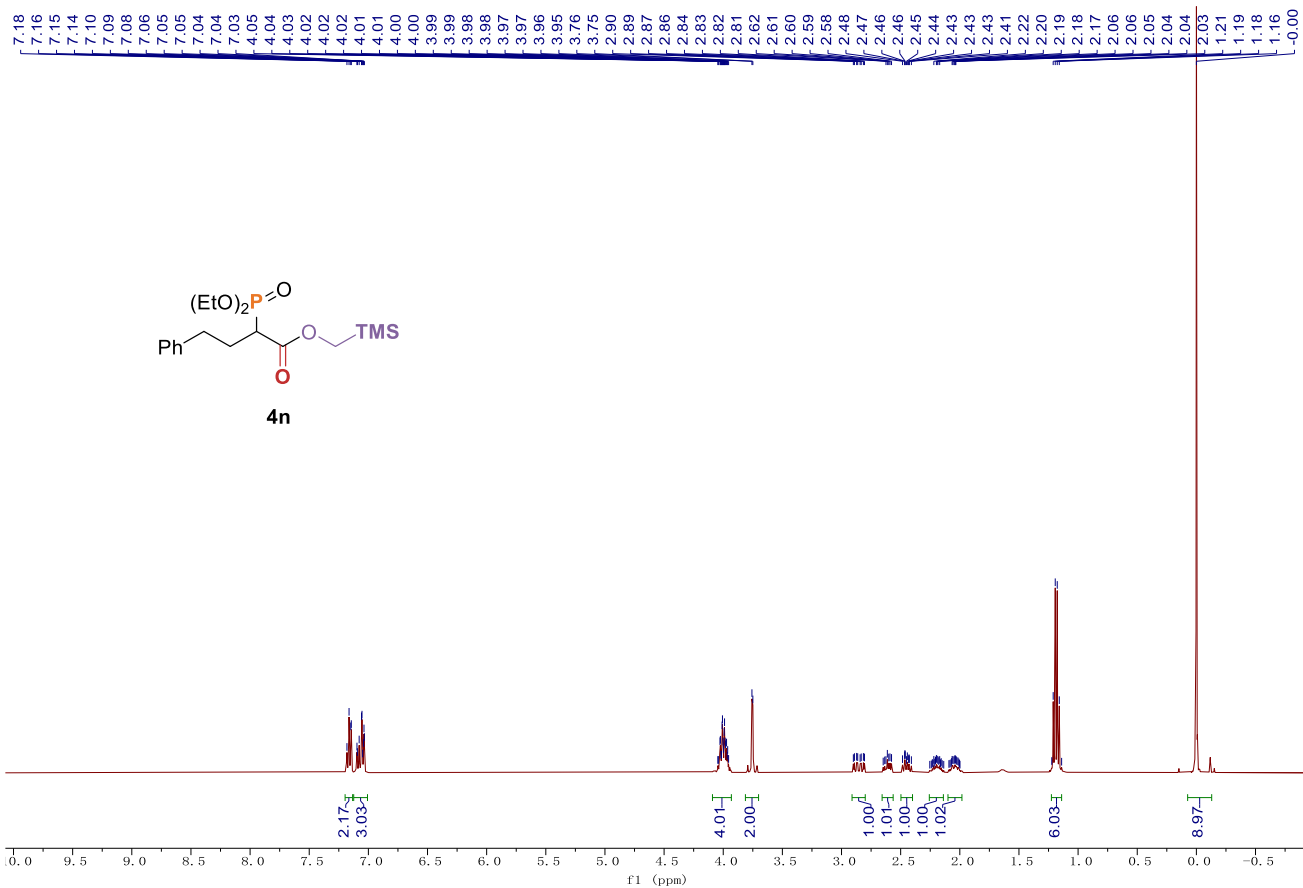

13C NMR CDCl3 100.62MHz

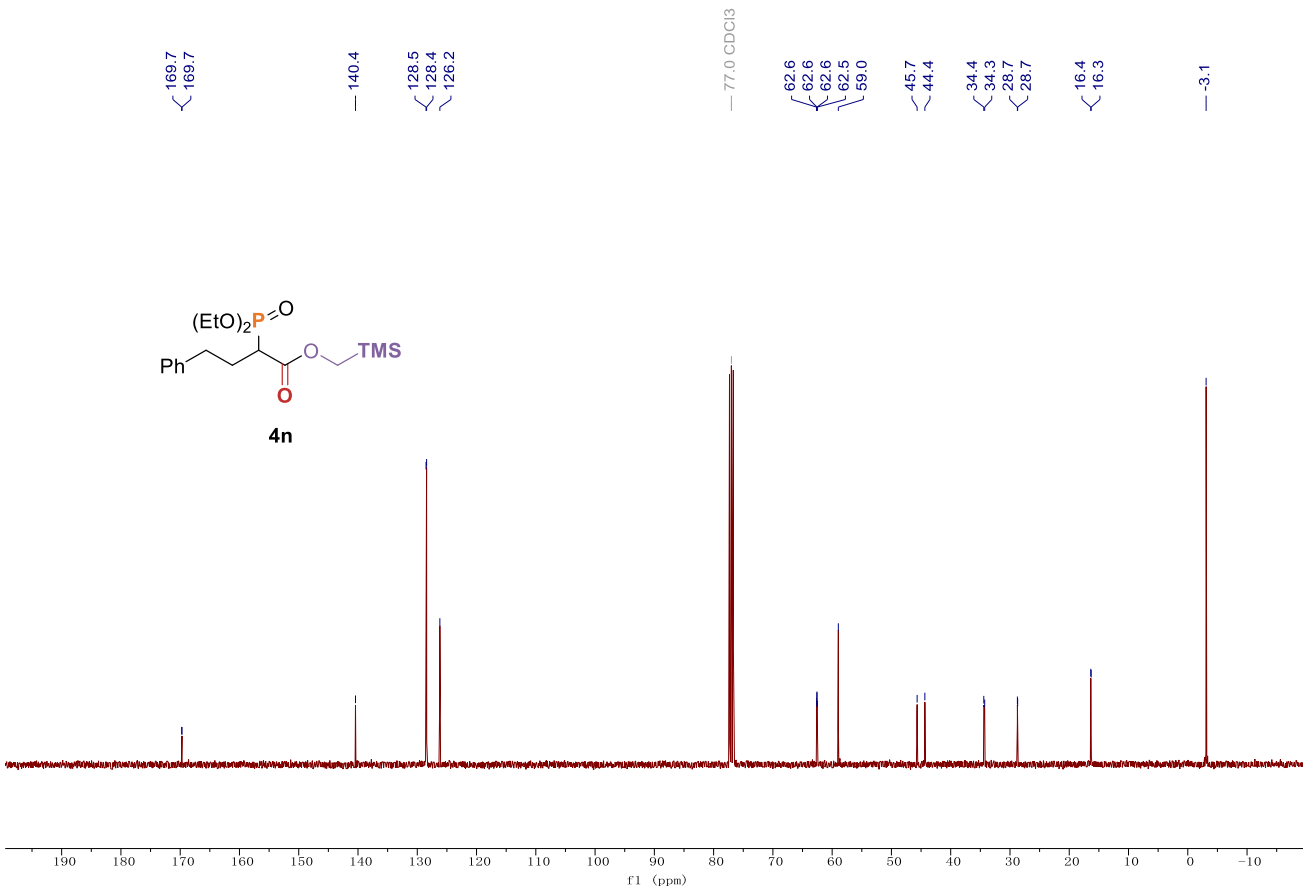

31P NMR CDCl3 161.97MHz

— 22.90

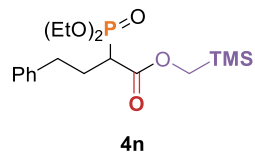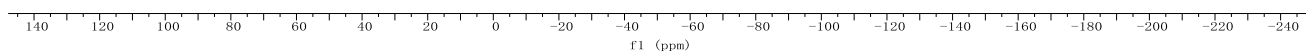

1H NMR CDCl3 400.13MHz

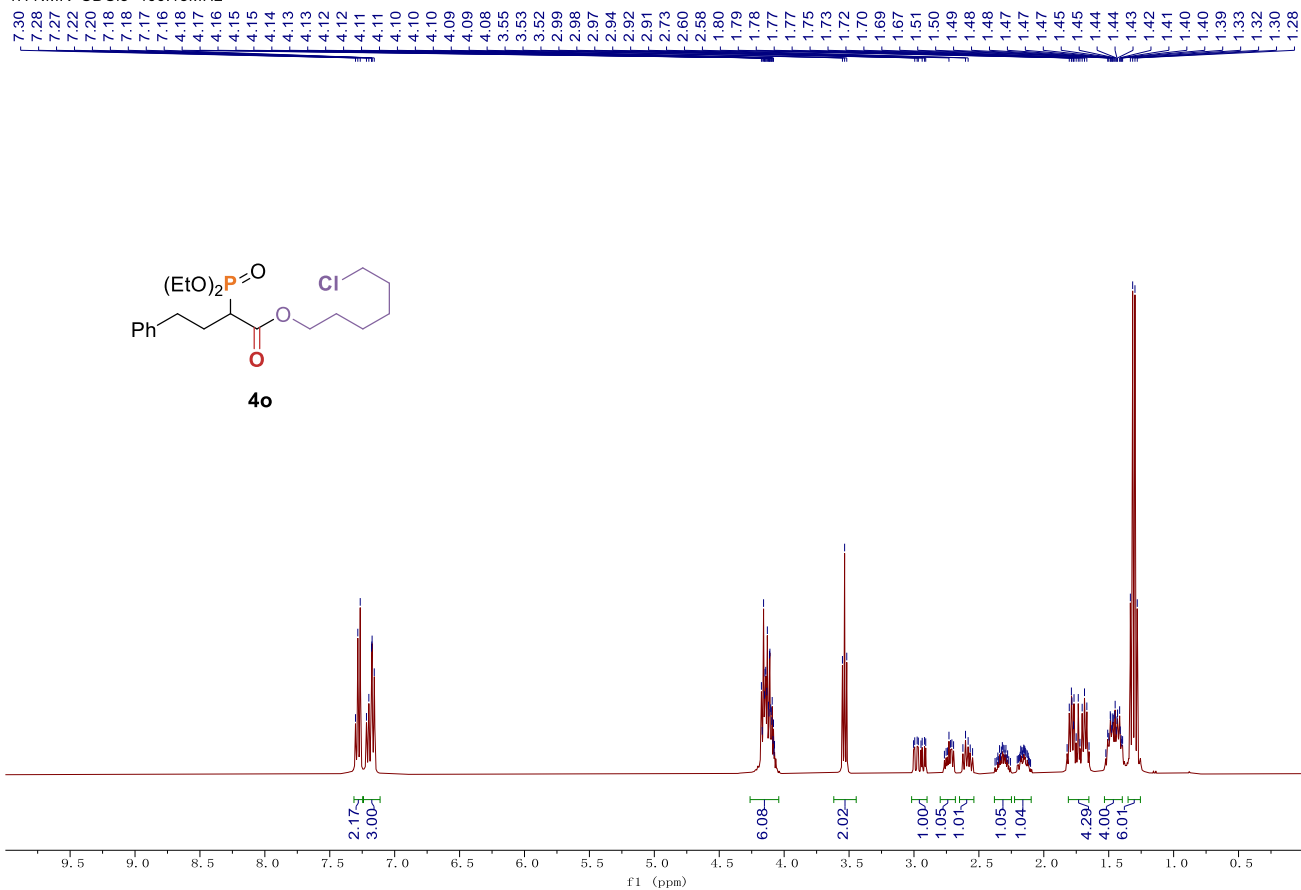

13C NMR CDCl3 100.62MHz

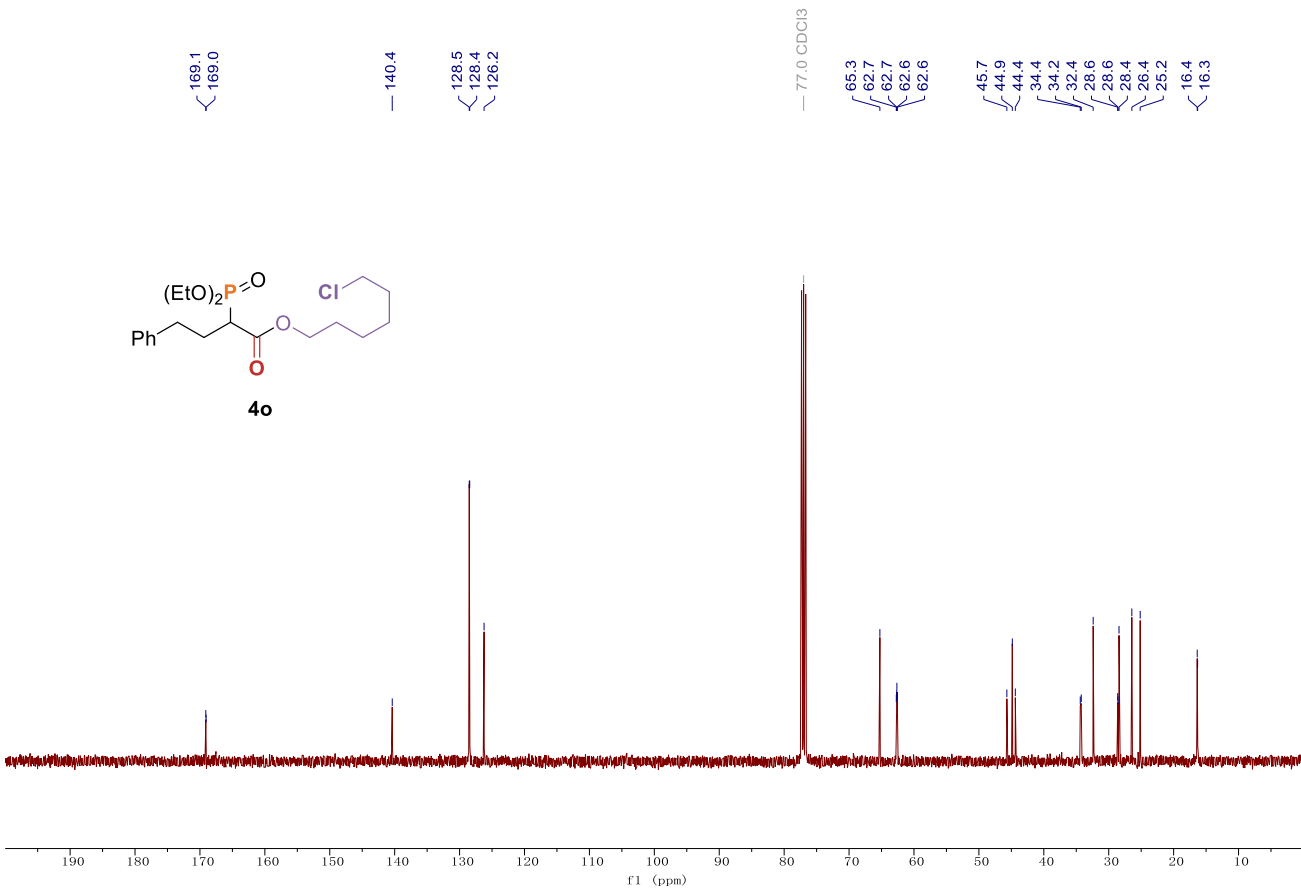

1H NMR CDCl3 161.97MHz

— 22.55

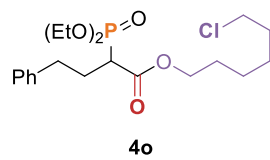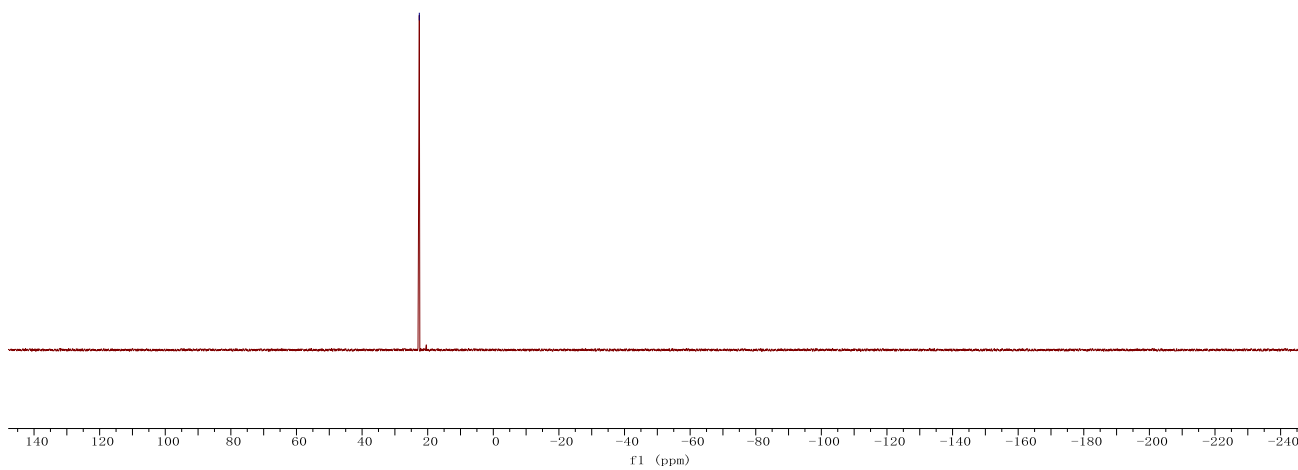



1H NMR CDCl3 400.13MHz

7.31  
7.30  
7.29  
7.29  
7.27  
7.26  
7.22  
7.22  
7.20  
7.19  
7.18  
7.18  
7.16  
7.16  
4.28  
4.27  
4.25  
4.24  
4.23  
4.22  
4.20  
4.19  
4.17  
4.17  
4.16  
4.15  
4.14  
4.14  
4.13  
4.13  
4.12  
4.12  
4.12  
4.11  
4.10  
4.10  
4.10  
4.09  
4.09  
4.08  
3.29  
3.27  
3.25  
3.00  
2.99  
2.97  
2.96  
2.94  
2.93  
2.92  
2.91  
2.74  
2.73  
2.72  
2.61  
2.59  
2.32  
2.19  
2.19  
2.18  
2.17  
2.16  
2.14  
2.13  
2.13  
1.34  
1.32  
1.31  
1.29

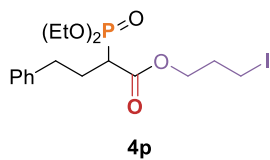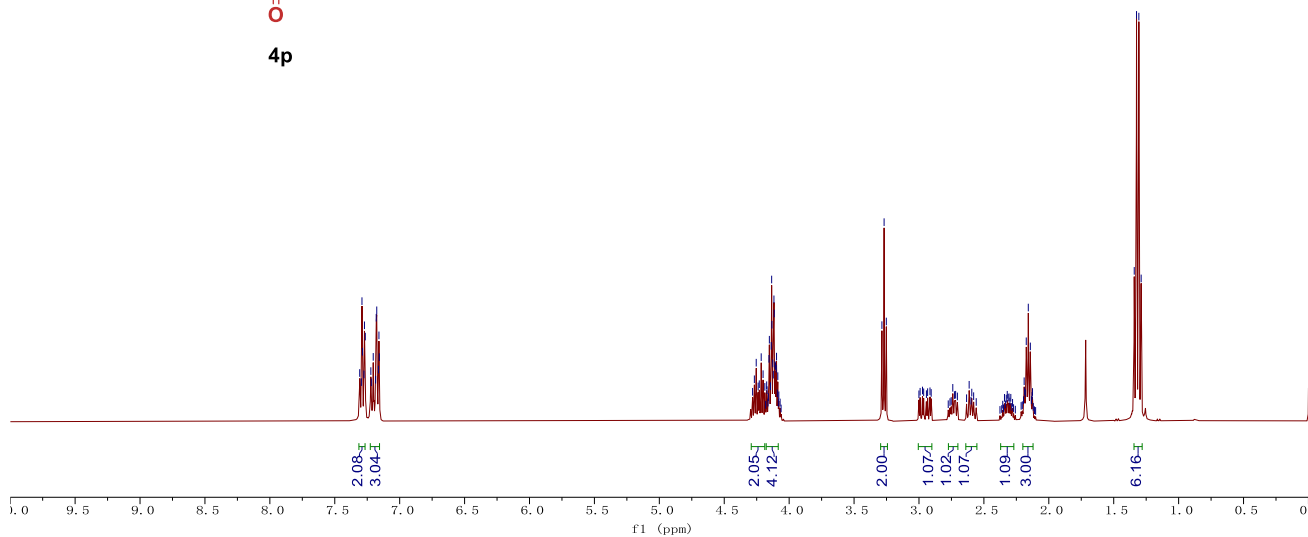

13C NMR CDCl3 100.62MHz

168.9  
168.8  
140.2  
128.5  
128.5  
126.3  
77.0 CDCl3  
64.8  
62.9  
62.8  
62.7  
45.6  
44.3  
34.4  
34.2  
32.2  
28.5  
28.4  
16.4  
16.4  
1.5

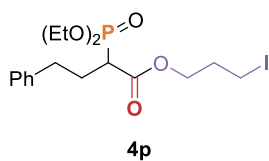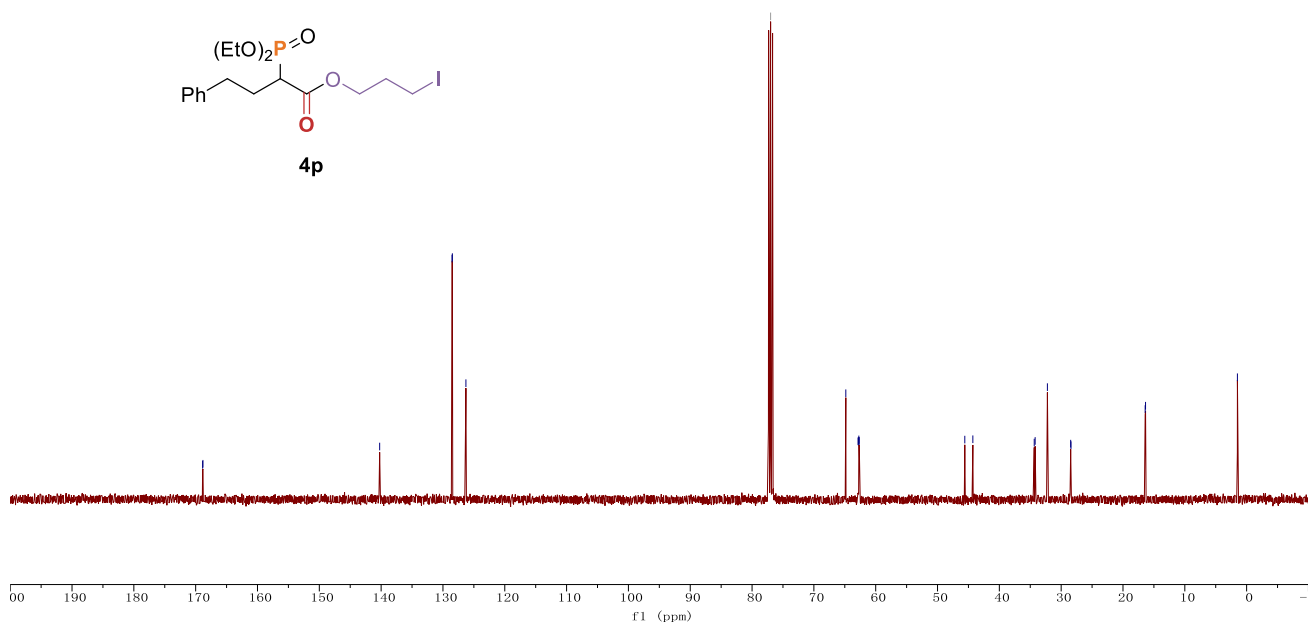

— 22.37

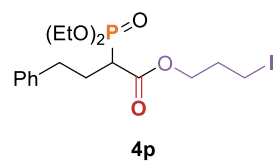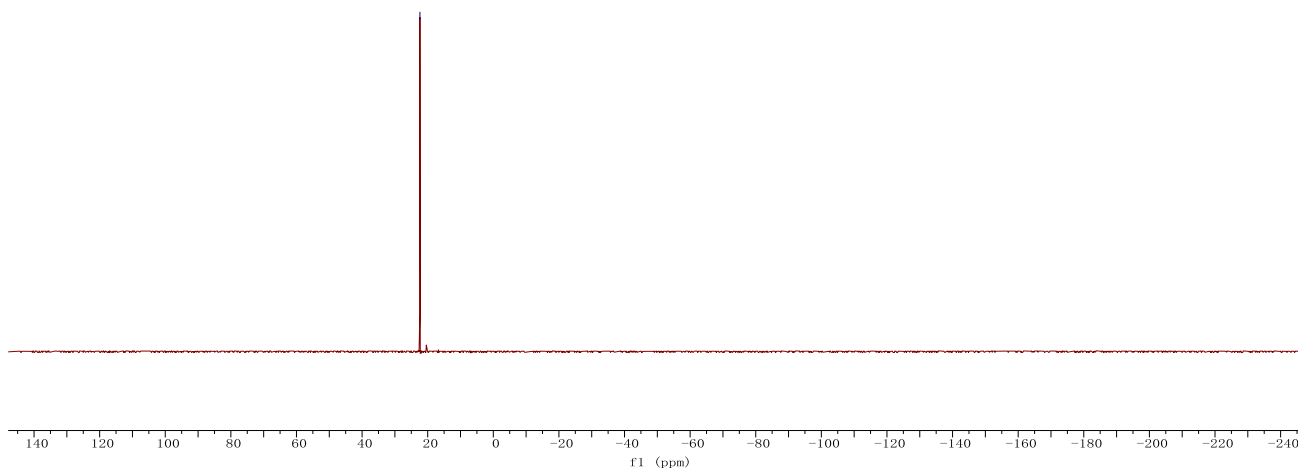

1H NMR CDCl3 400.13MHz

7.30  
7.28  
7.28  
7.27  
7.26  
7.21  
7.21  
7.20  
7.18  
7.17  
7.16  
4.17  
4.16  
4.15  
4.13  
4.13  
4.13  
4.12  
4.12  
4.11  
4.11  
4.11  
4.10  
4.10  
4.09  
4.08  
4.08  
4.07  
4.07  
3.03  
3.02  
3.00  
2.99  
2.97  
2.96  
2.94  
2.93  
2.75  
2.74  
2.73  
2.71  
2.70  
2.69  
2.62  
2.62  
2.60  
2.59  
2.58  
2.57  
2.57  
2.55  
2.35  
2.33  
2.33  
2.32  
2.31  
2.31  
2.30  
2.18  
2.17  
2.17  
2.16  
2.15  
2.15  
2.14  
2.14  
1.33  
1.31  
1.30  
1.28

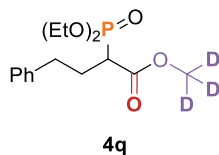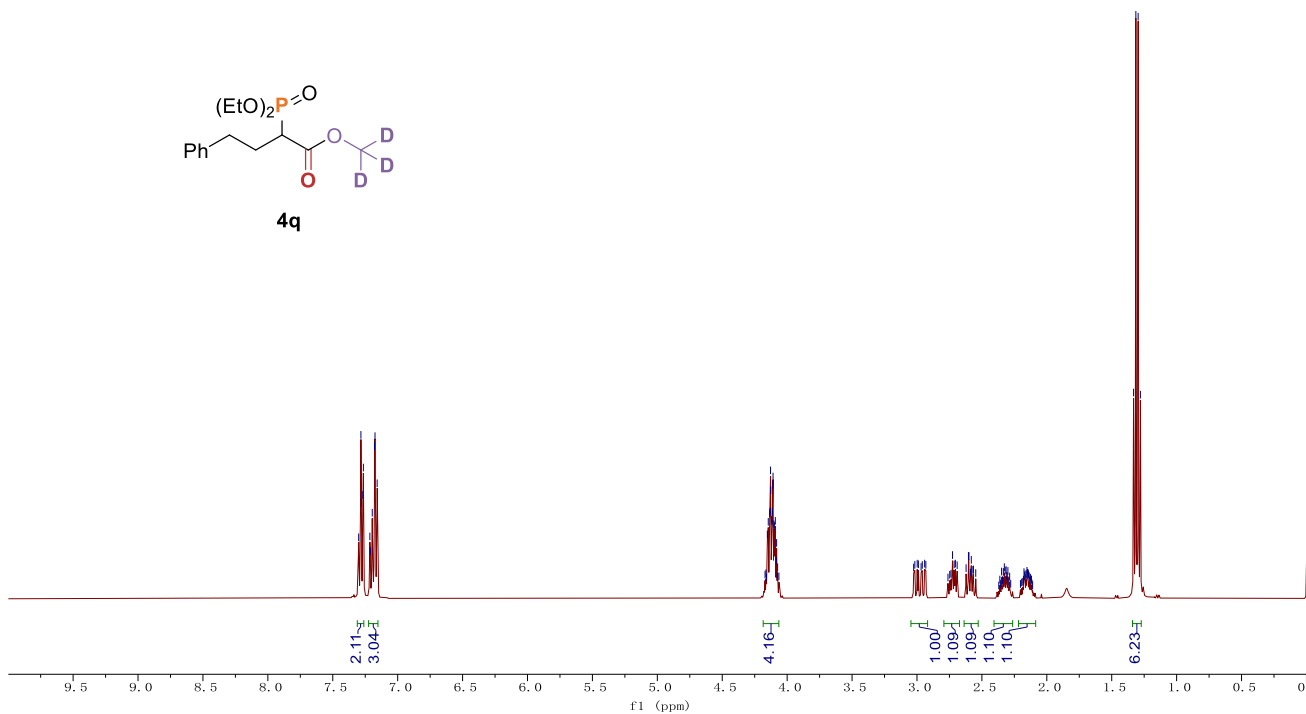

13C NMR CDCl3 100.62MHz

169.6  
169.5  
140.3  
128.5  
128.4  
126.2  
77.0 CDCl3  
62.8  
62.7  
62.7  
62.6  
45.5  
44.2  
34.4  
34.2  
28.6  
28.6  
16.3  
16.3  
16.2

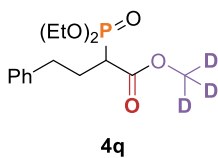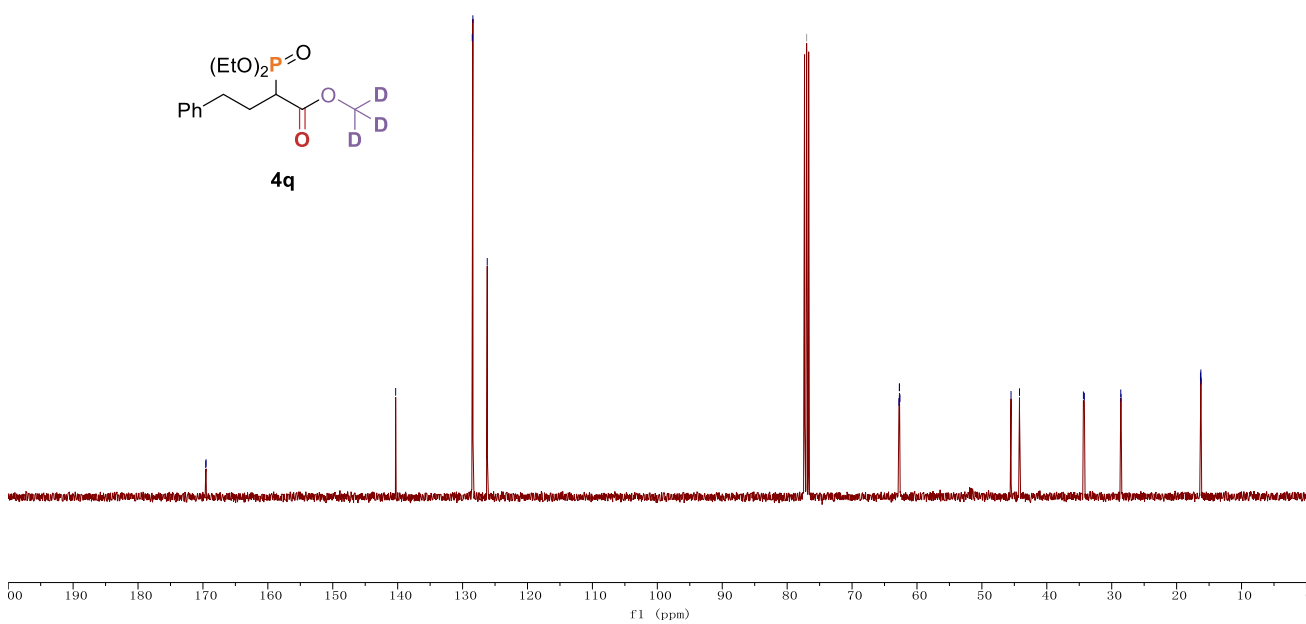

31P NMR CDCl3 161.97MHz

-- 22.51

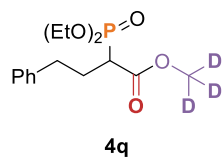

1H NMR CDCl3 400.13MHz

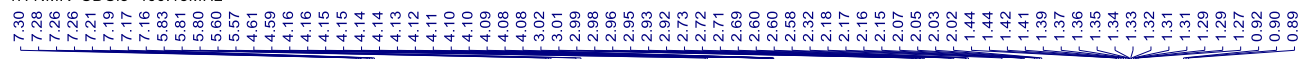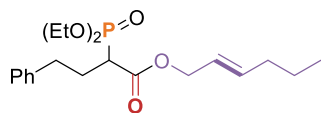

4r

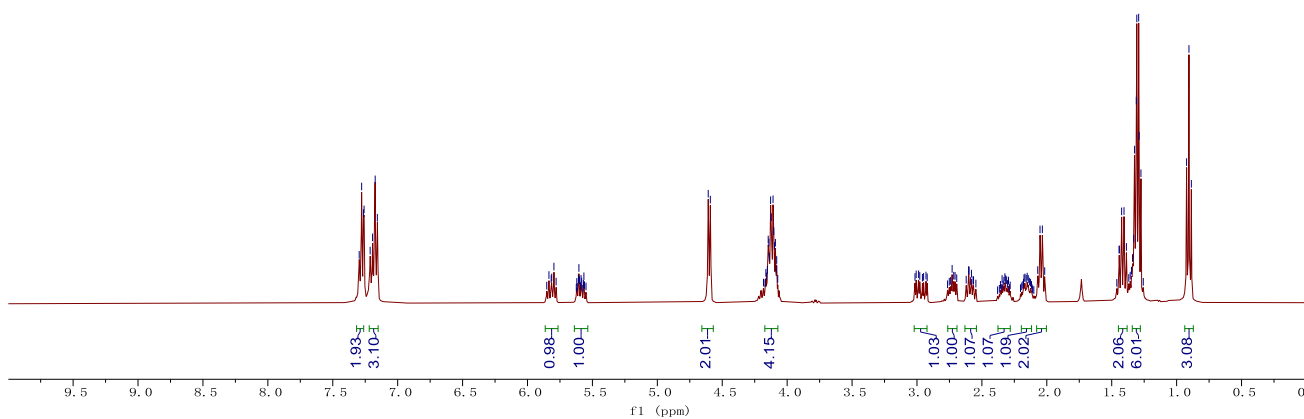

13C NMR CDCl3 100.62MHz

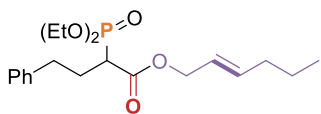

4r

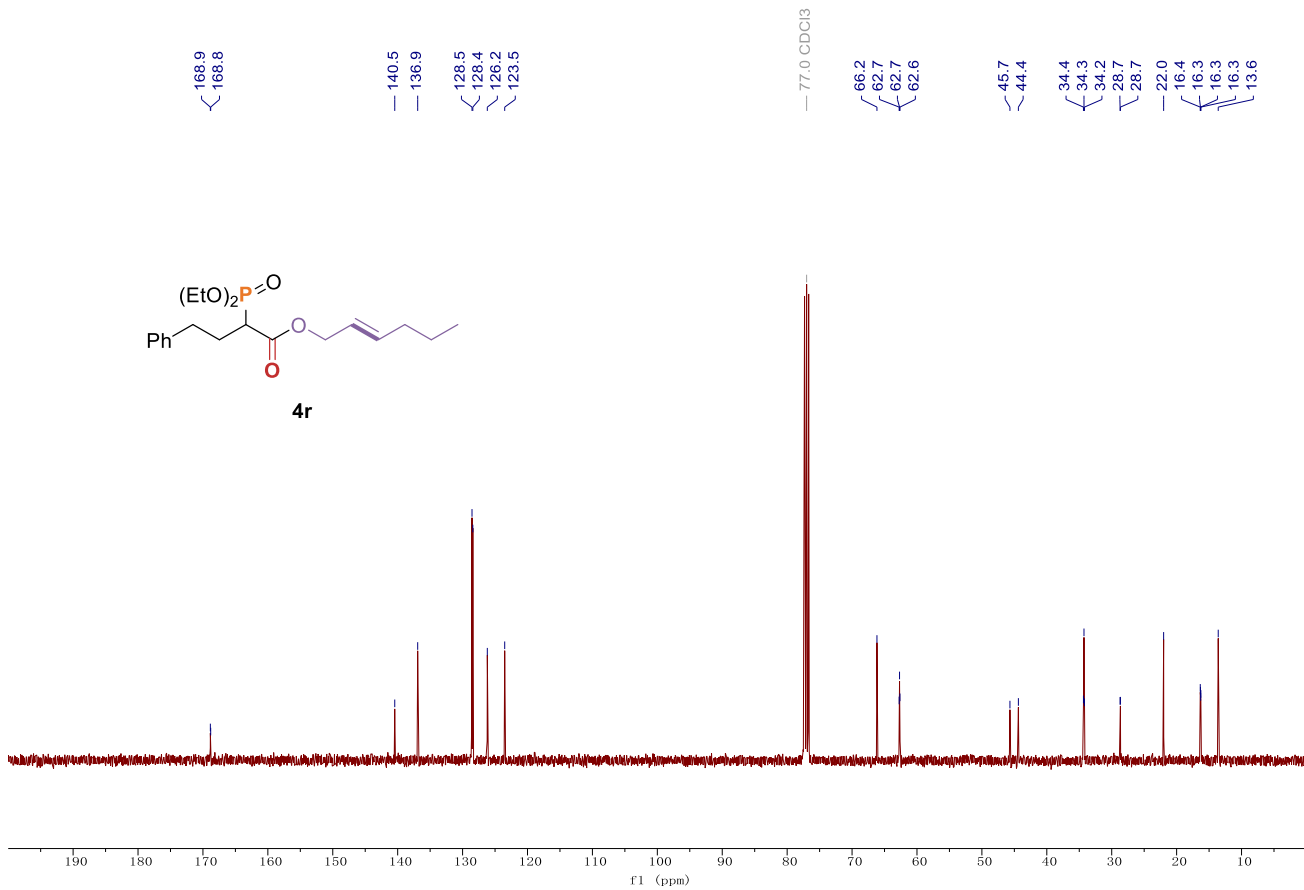

— 22.43

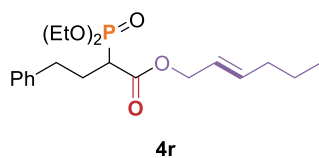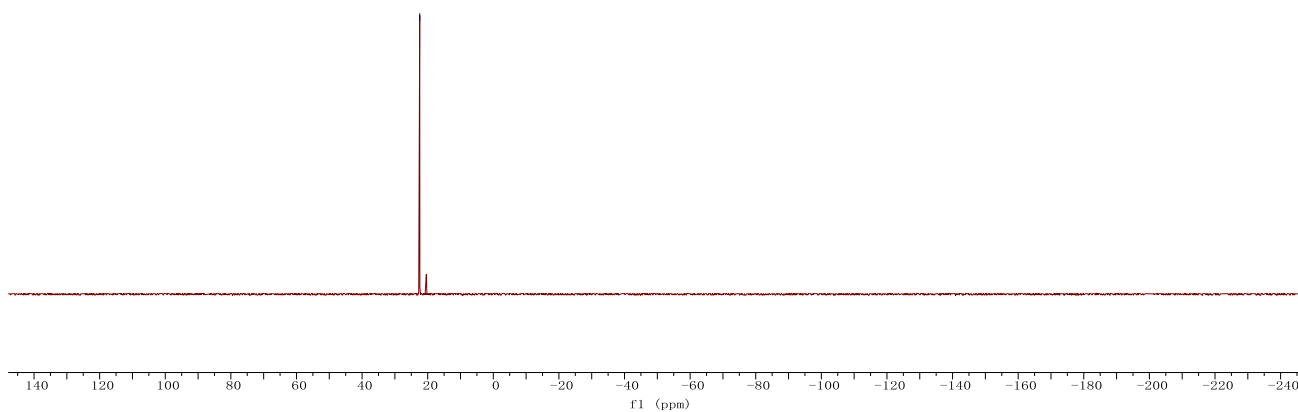

1H NMR CDCl3 400.13MHz

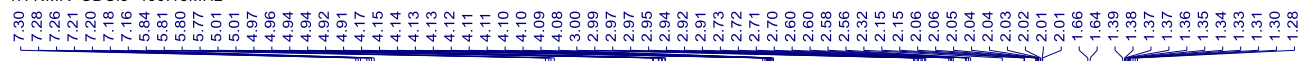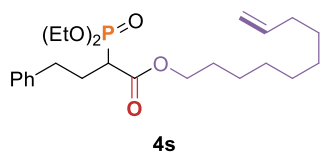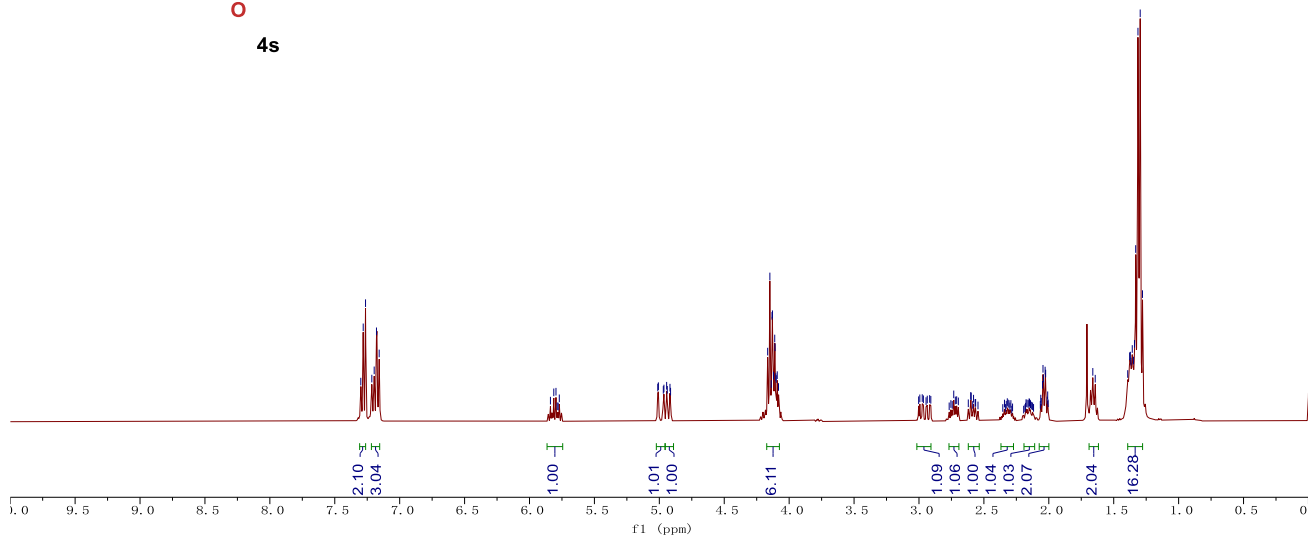

13C NMR CDCl3 100.62MHz

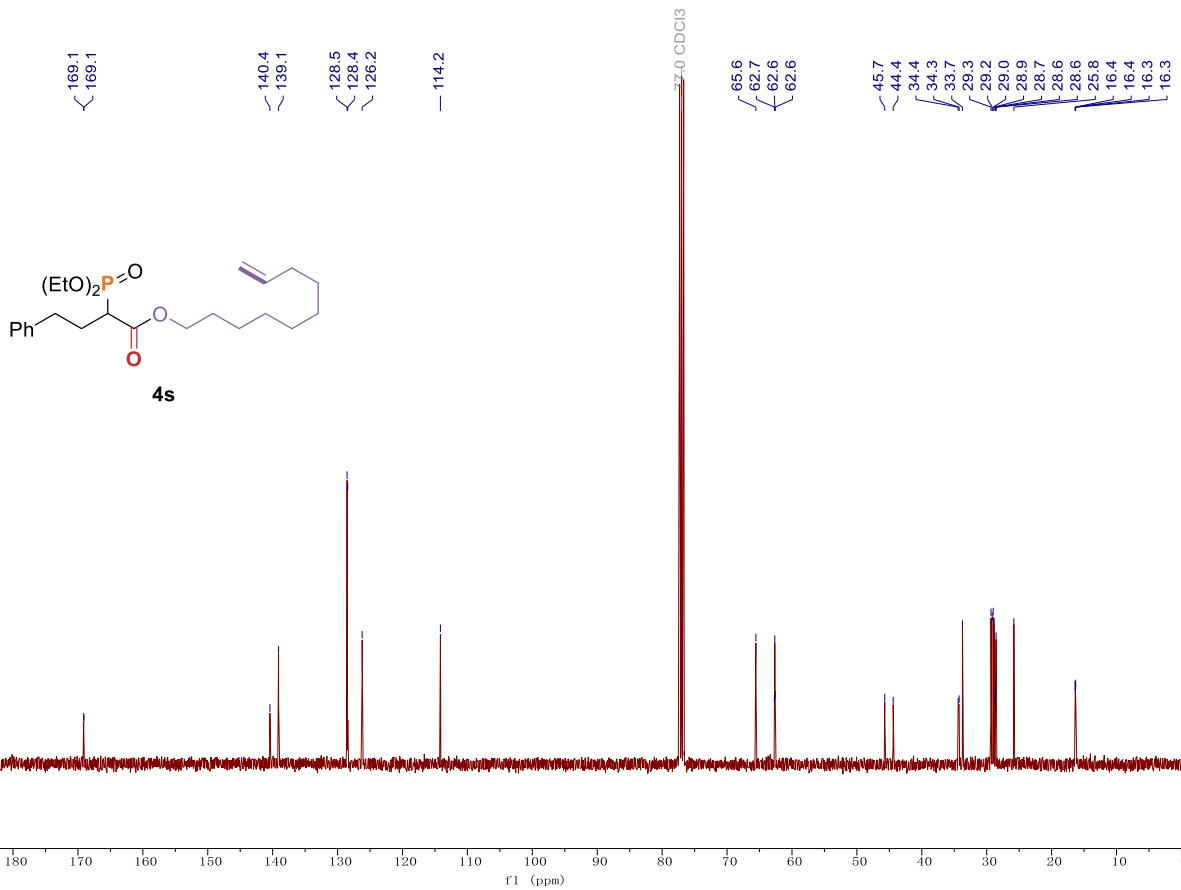

31P NMR CDCl3 161.97MHz

— 22.61

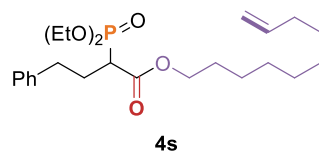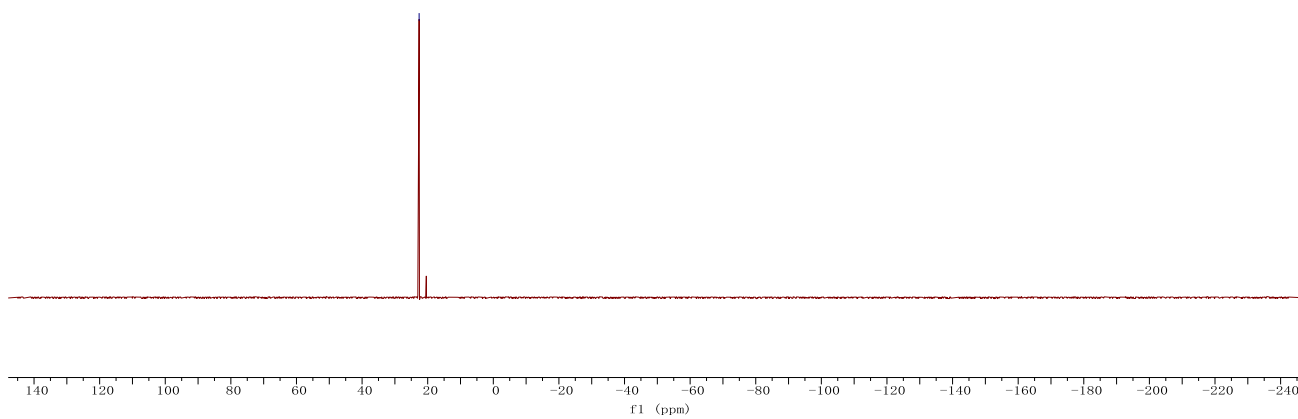



1H NMR CDCl3 400.13MHz

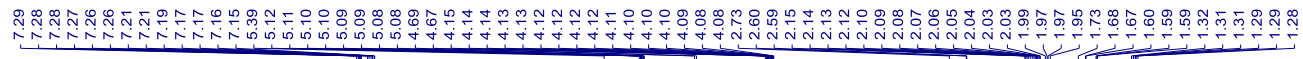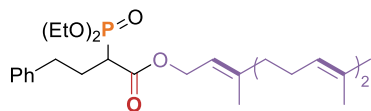

4t

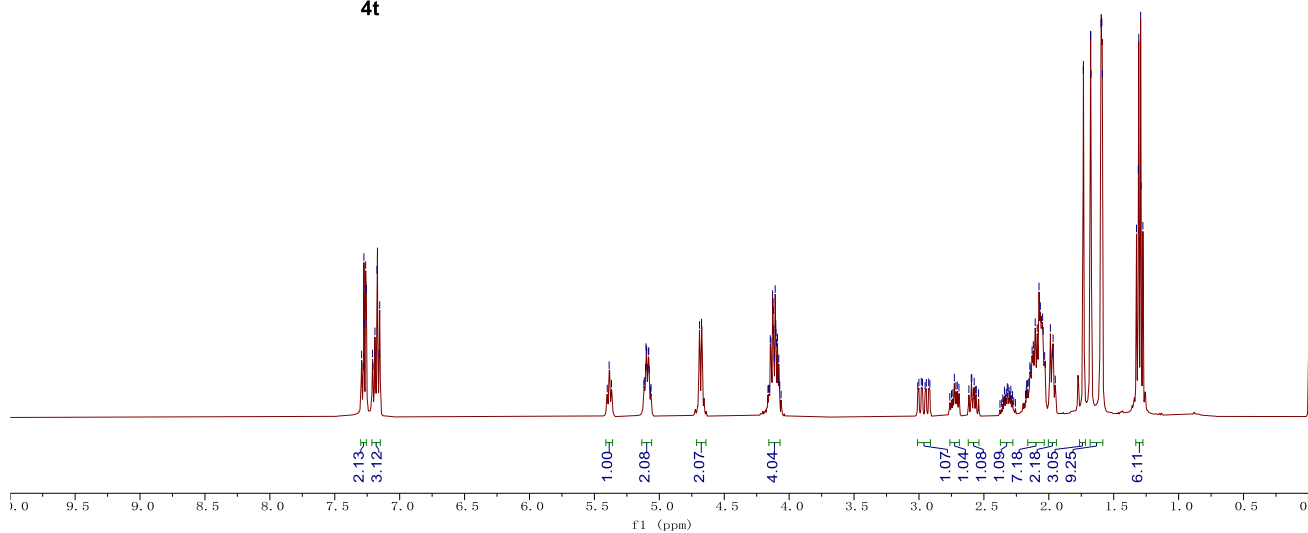

13C NMR CDCl3 100.62MHz

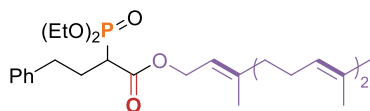

4t

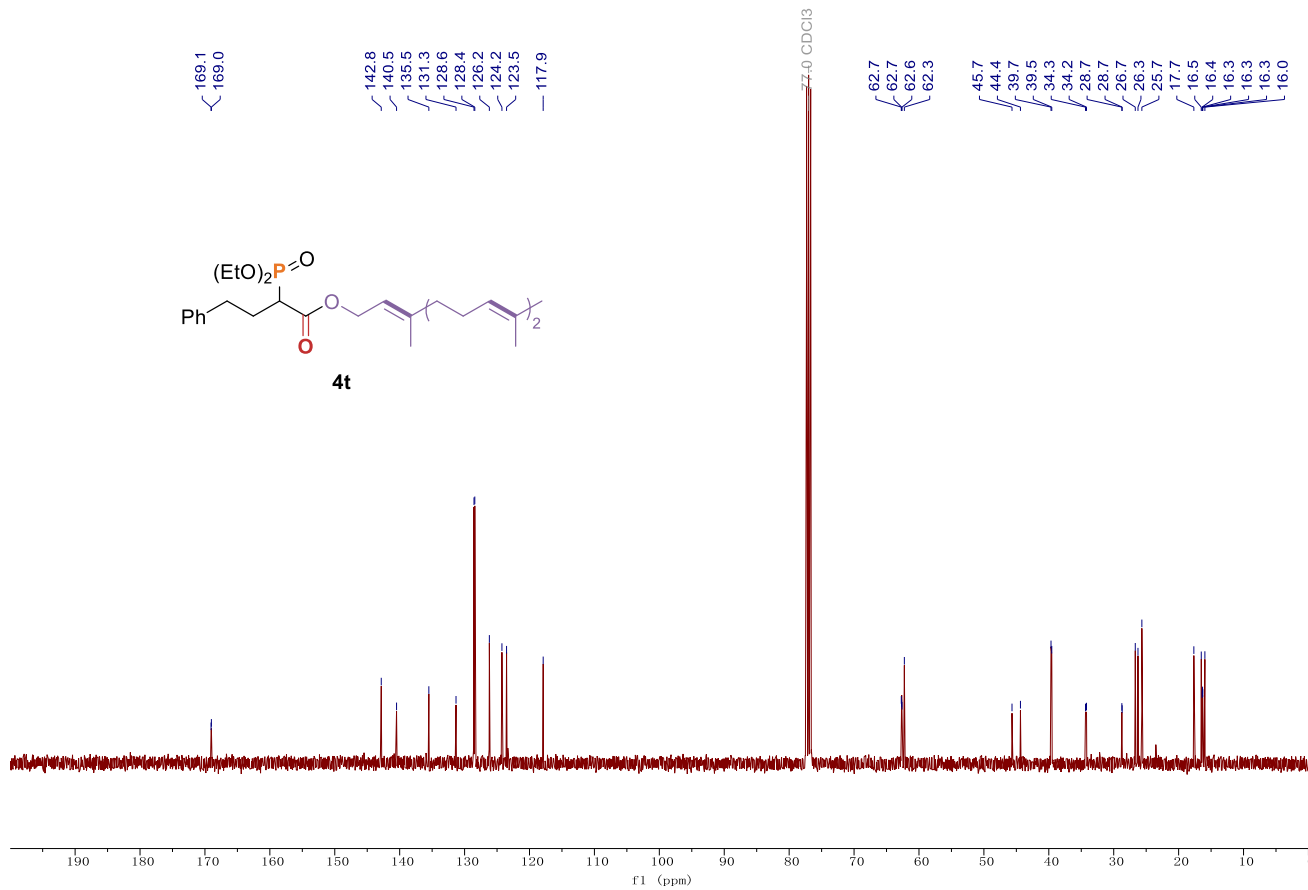

31P NMR CDCl3 161.97MHz

— 22.52

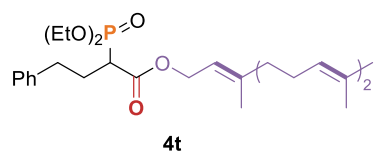

1H NMR CDCl3 400.13MHz

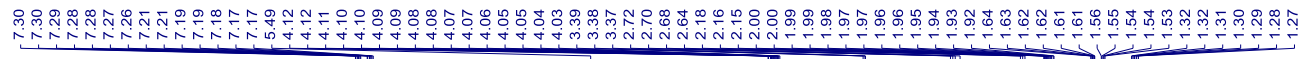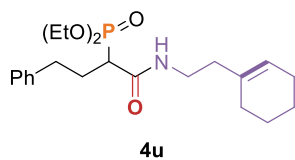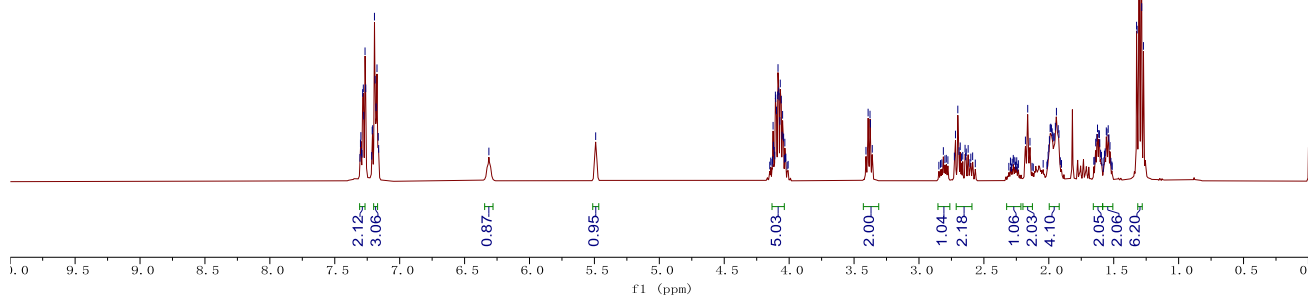

13C NMR CDCl3 100.62MHz

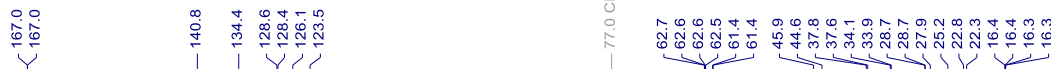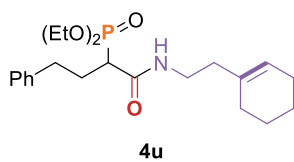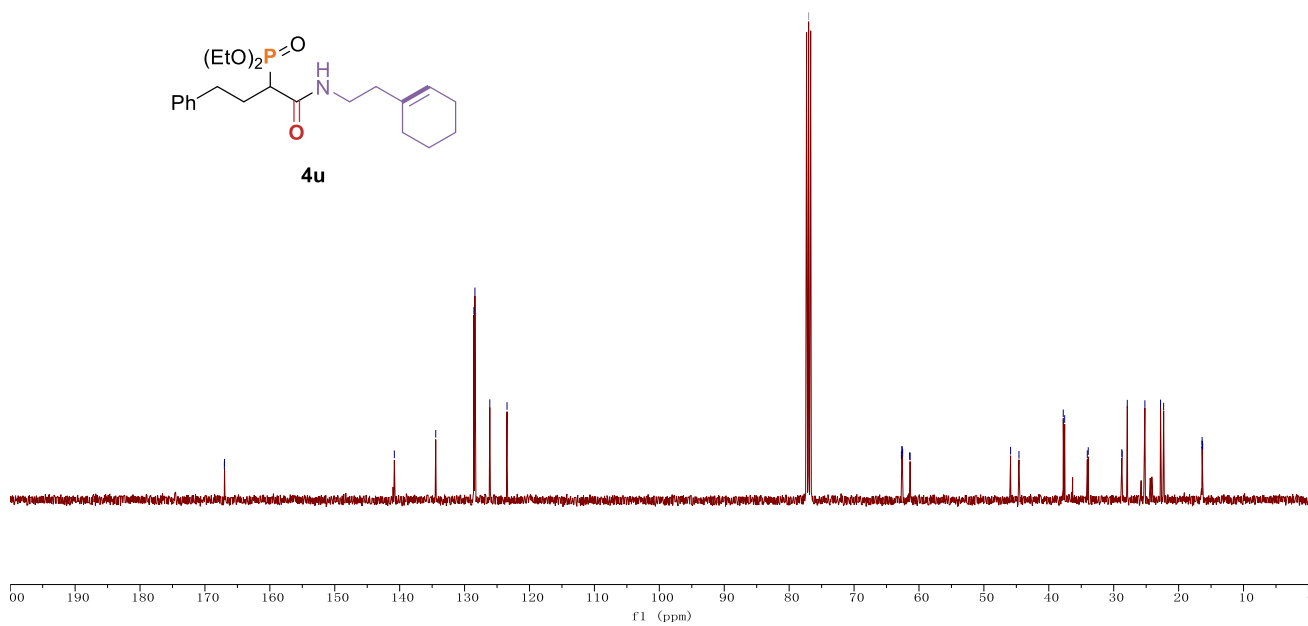

31P NMR CDCl3 161.97MHz

25.60

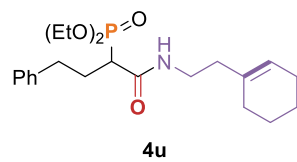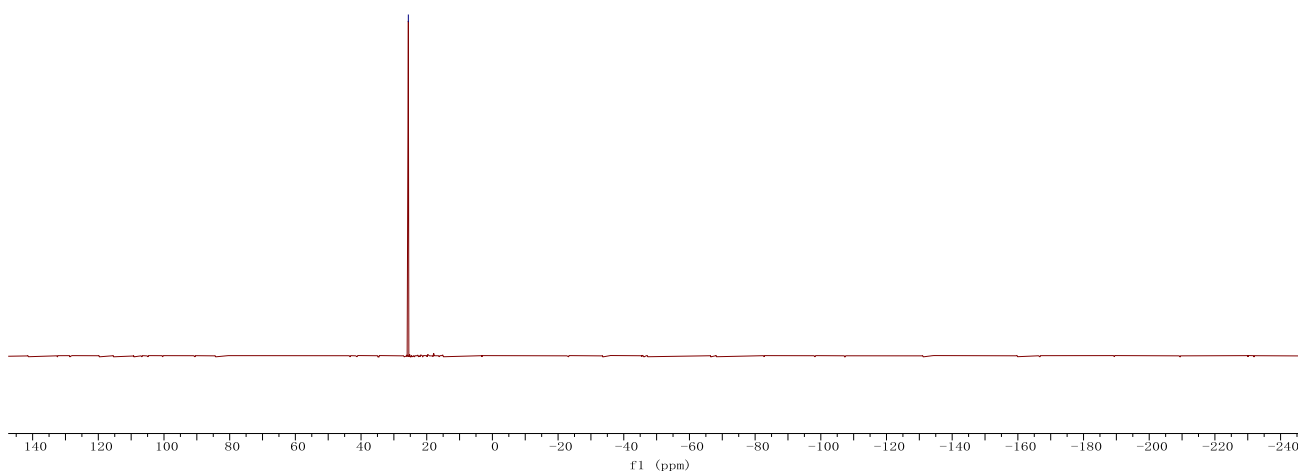

1H NMR CDCl3 400.13MHz

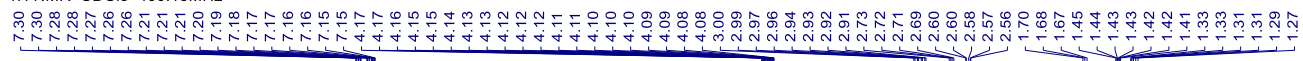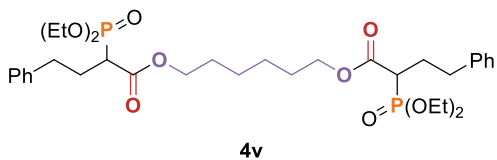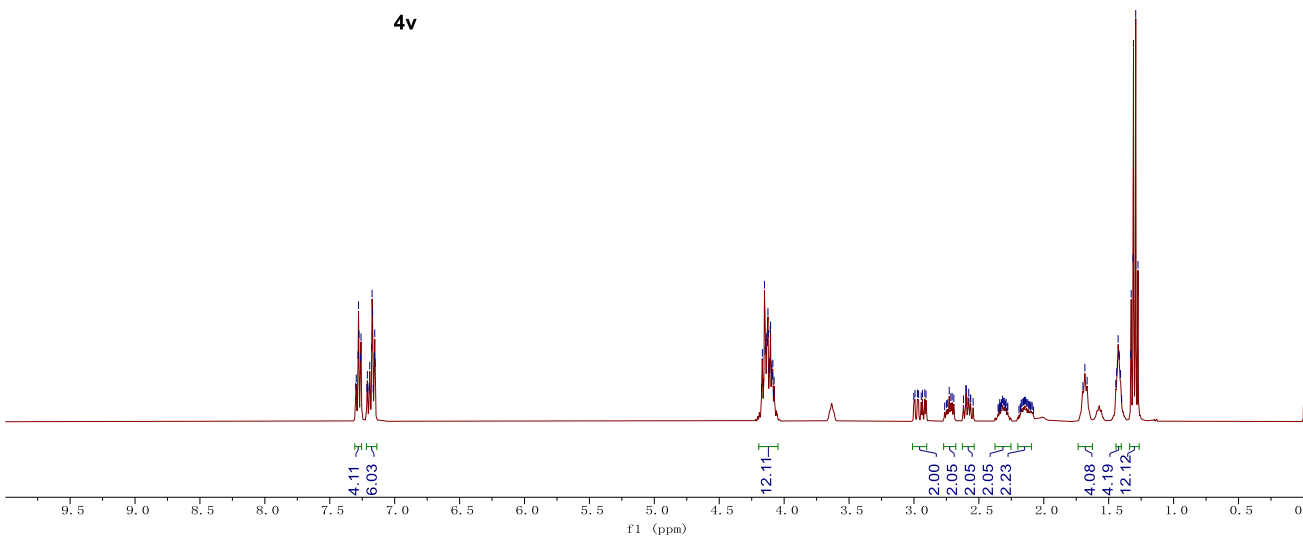

13C NMR CDCl3 100.62MHz

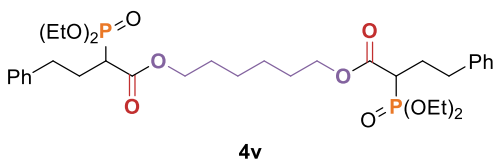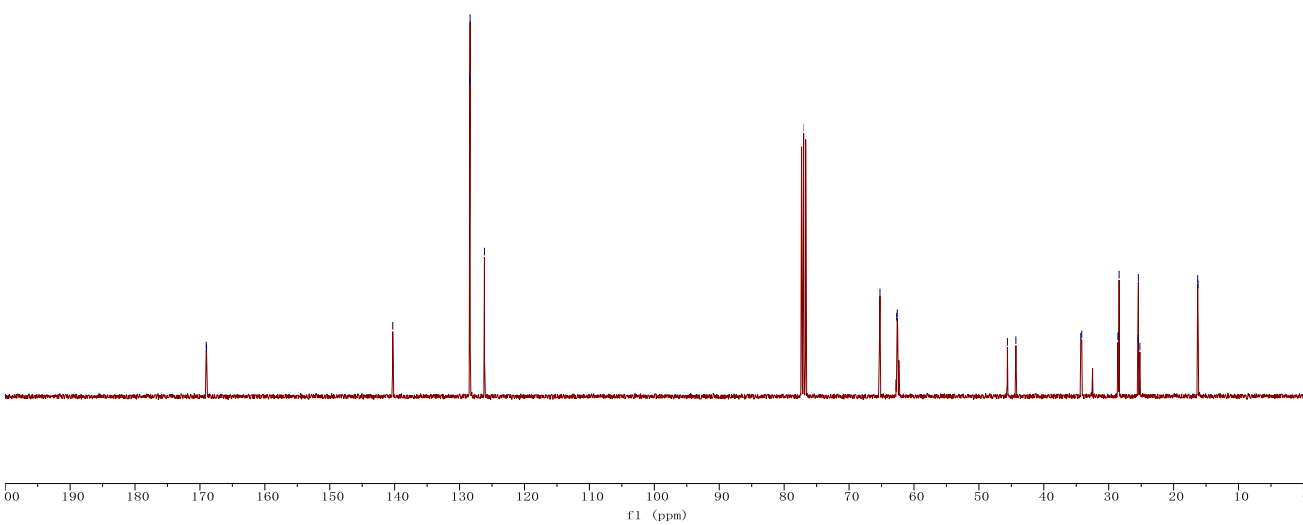

31P NMR CDCl3 161.97MHz

— 22.65

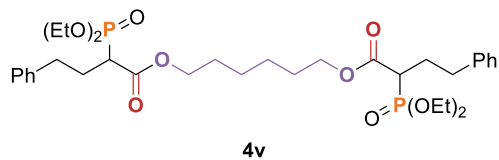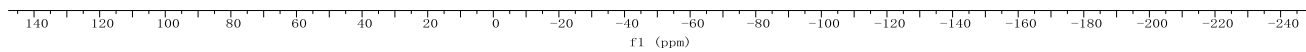

1H NMR CDCl3 400.13MHz

7.29  
7.28  
7.26  
7.21  
7.21  
7.20  
7.19  
7.18  
7.18  
7.17  
7.17  
7.16  
7.16  
7.15  
4.73  
4.72  
4.71  
4.71  
4.70  
4.70  
4.69  
4.69  
4.68  
4.68  
4.67  
4.66  
4.16  
4.15  
4.15  
4.14  
4.14  
4.12  
2.94  
2.93  
2.91  
2.90  
2.88  
2.87  
2.85  
2.85  
2.73  
2.71  
2.70  
2.69  
2.59  
2.58  
2.57  
2.55  
1.68  
1.66  
1.66  
1.64  
1.63  
1.40  
1.39  
1.38  
1.37  
1.36  
1.35  
1.33  
1.33  
1.31  
1.31  
1.30  
1.29  
1.28  
1.27  
1.26  
1.26  
1.23  
1.23  
0.88  
0.86

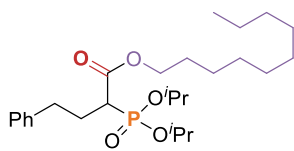

5a

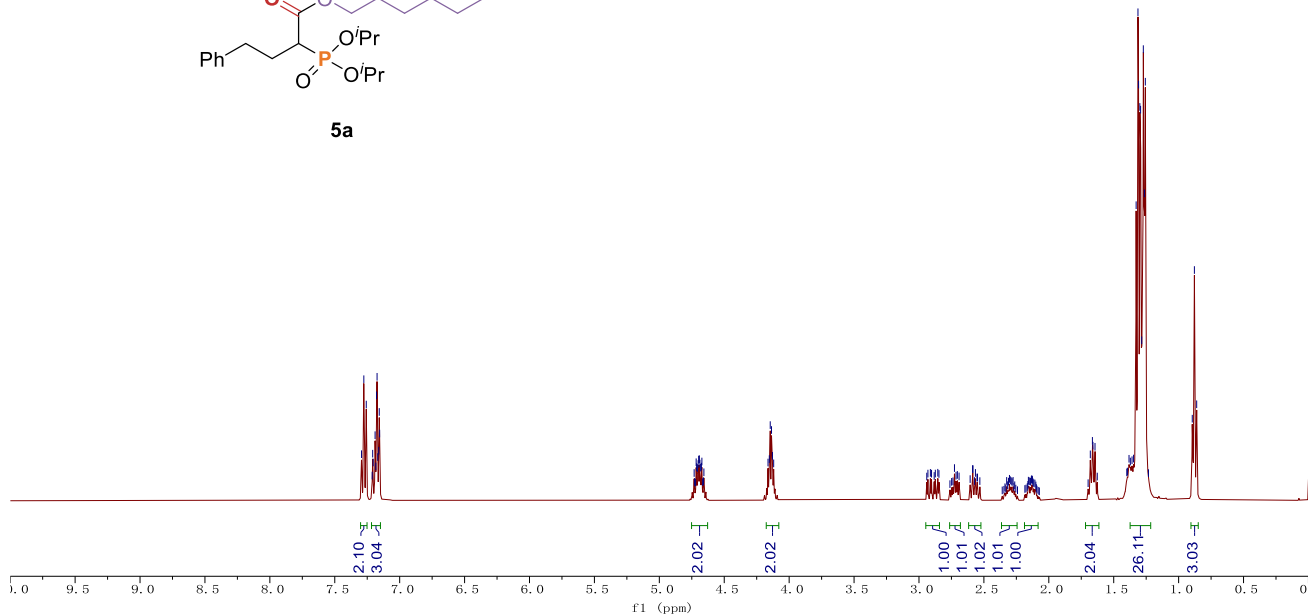

13C NMR CDCl3 100.62MHz

169.2  
169.2  
140.5  
128.5  
128.4  
126.1  
77.0 CDCl3  
71.3  
71.2  
71.1  
71.1  
65.4  
46.5  
45.2  
34.4  
34.3  
31.8  
29.5  
29.2  
28.8  
28.8  
28.5  
25.8  
24.1  
24.0  
24.0  
23.9  
23.8  
23.7  
23.7  
23.7  
22.6  
14.0

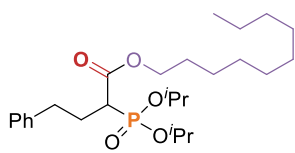

5a

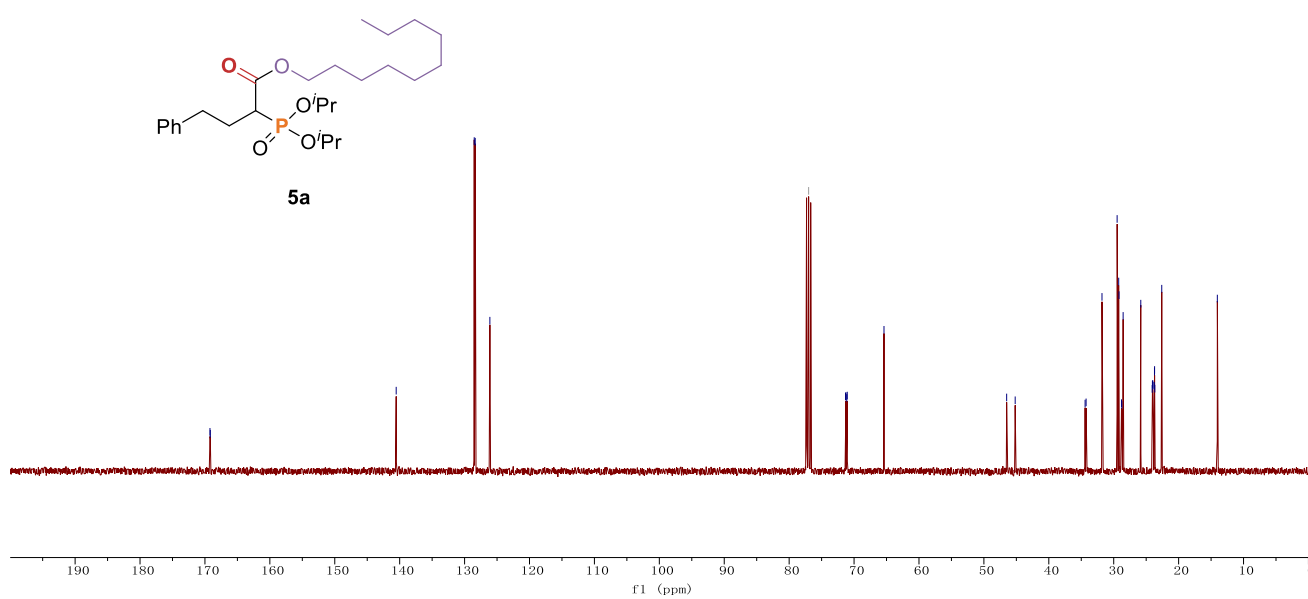

31P NMR CDCl3 161.97MHz

20.60

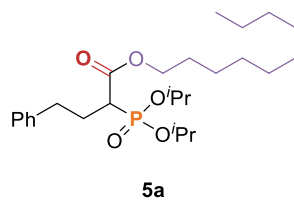



1H NMR CDCl3 400.13MHz

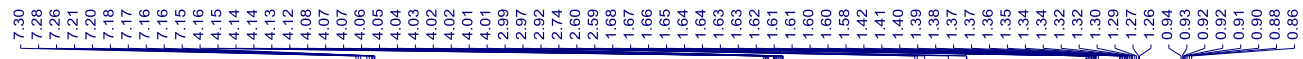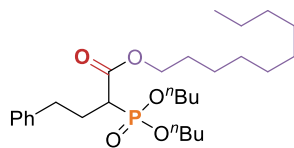

5b

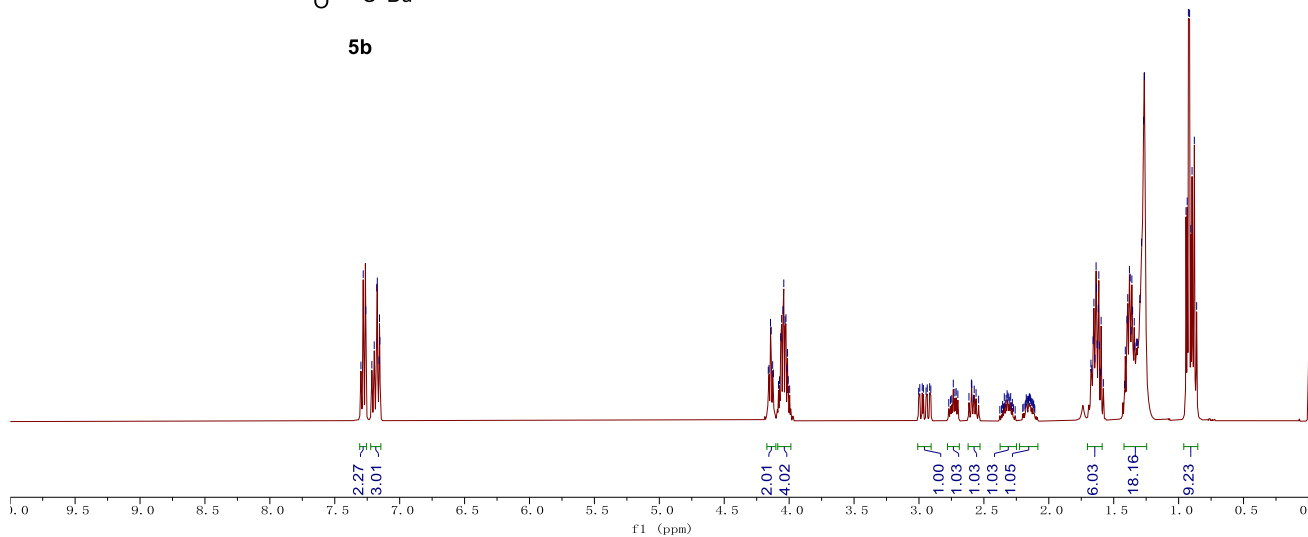

13C NMR CDCl3 100.62MHz

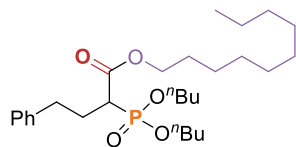

5b

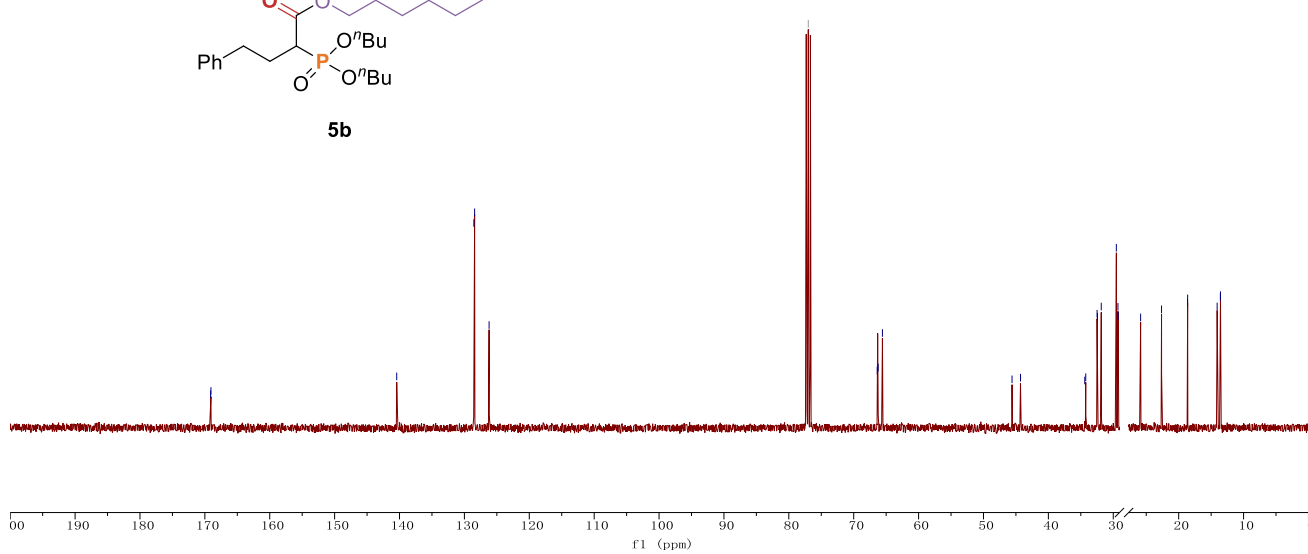

31P NMR CDCl3 161.97MHz

-- 22.51

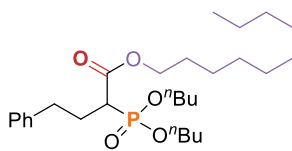

**5b**



1H NMR CDCl3 400.13MHz

4.16  
4.15  
4.15  
4.14  
4.14  
4.13  
4.12  
4.12  
4.11  
4.10  
4.10  
4.09  
4.09  
4.08  
4.07  
3.05  
3.03  
3.01  
2.99  
2.99  
2.97  
2.95  
2.94  
1.65  
1.63  
1.61  
1.61  
1.60  
1.59  
1.58  
1.44  
1.42  
1.40  
1.38  
1.32  
1.31  
1.30  
1.30  
1.29  
1.28  
1.27  
1.26  
1.25  
1.24  
1.23  
0.86  
0.84  
0.83

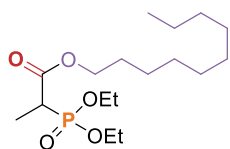

5c

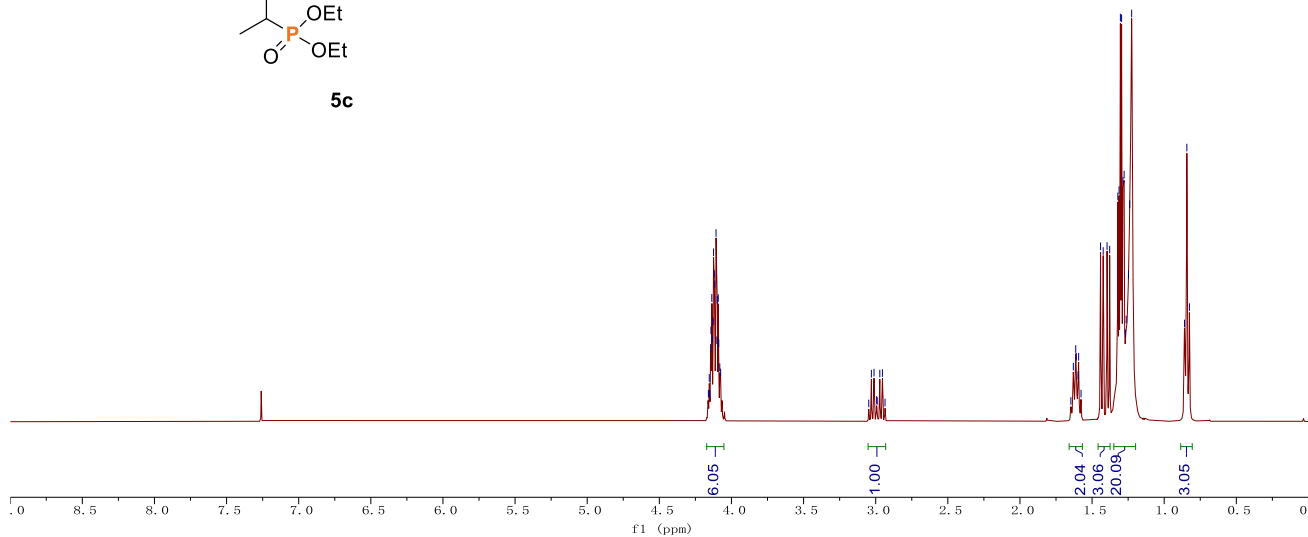

13C NMR CDCl3 100.62MHz

169.8  
169.7

77.0 CDCl3

65.5  
62.5  
62.5

39.9  
38.6  
31.8  
29.4  
29.4  
29.2  
29.1  
28.4  
28.4  
25.7  
22.6  
16.3  
16.3  
16.3  
16.2  
14.0  
11.7  
11.6

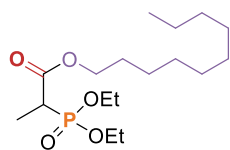

5c

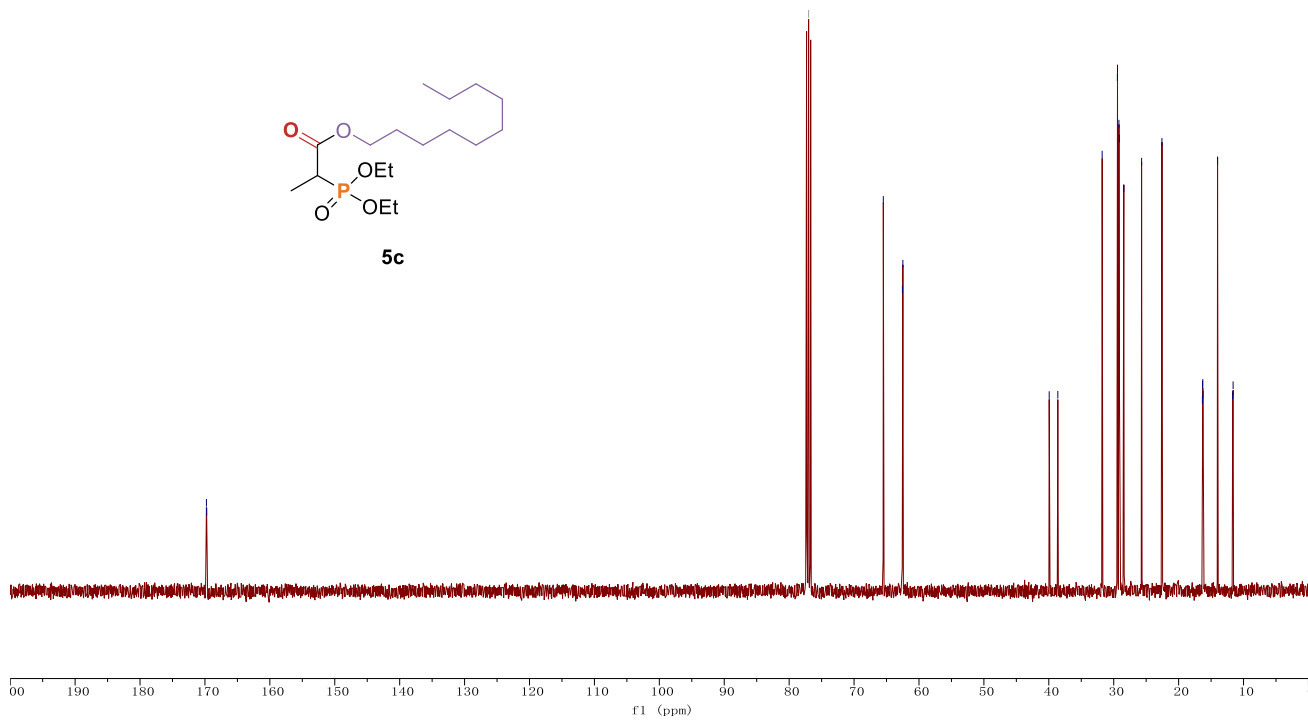

31P NMR CDCl3 161.97MHz

23.89

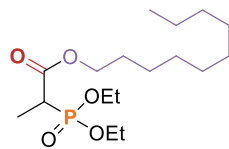

5c

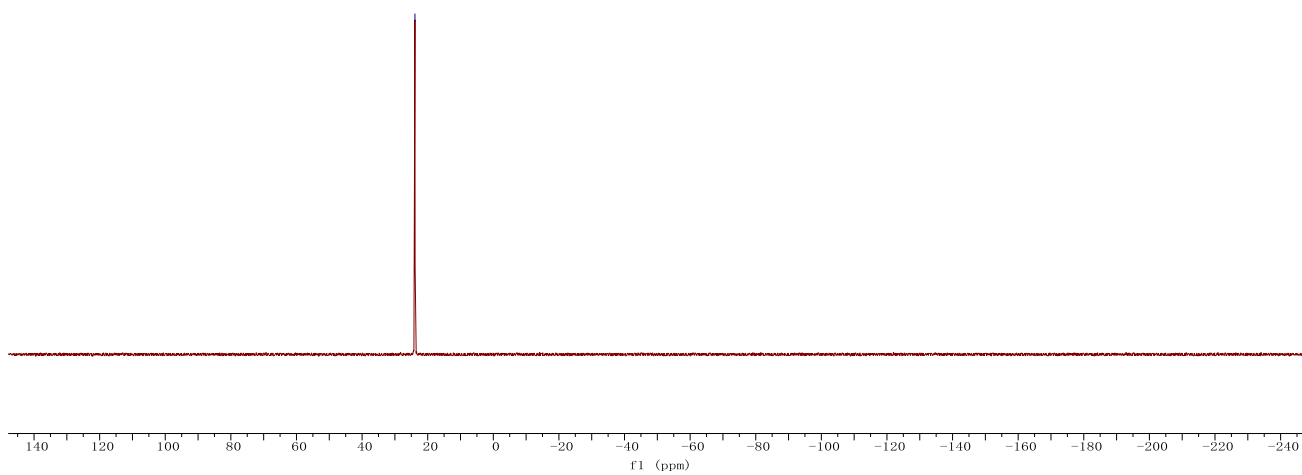

1H NMR CDCl3 400.13MHz

4.21  
4.19  
4.17  
4.17  
4.16  
4.15  
4.14  
4.13  
4.12  
4.11  
4.10  
4.09  
4.09  
4.08  
4.06  
3.06  
3.05  
3.03  
3.02  
3.00  
3.00  
2.97  
2.97  
2.01  
1.99  
1.98  
1.97  
1.96  
1.95  
1.94  
1.94  
1.65  
1.63  
1.62  
1.60  
1.59  
1.58  
1.57  
1.57  
1.56  
1.55  
1.54  
1.53  
1.53  
1.37  
1.35  
1.35  
1.33  
1.32  
1.32  
1.30  
1.30  
1.29  
1.28  
1.27  
1.23  
0.97  
0.95  
0.92  
0.90  
0.89  
0.87  
0.87  
0.86  
0.85  
0.83

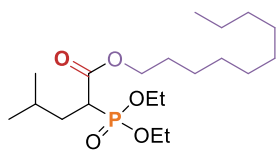

5d

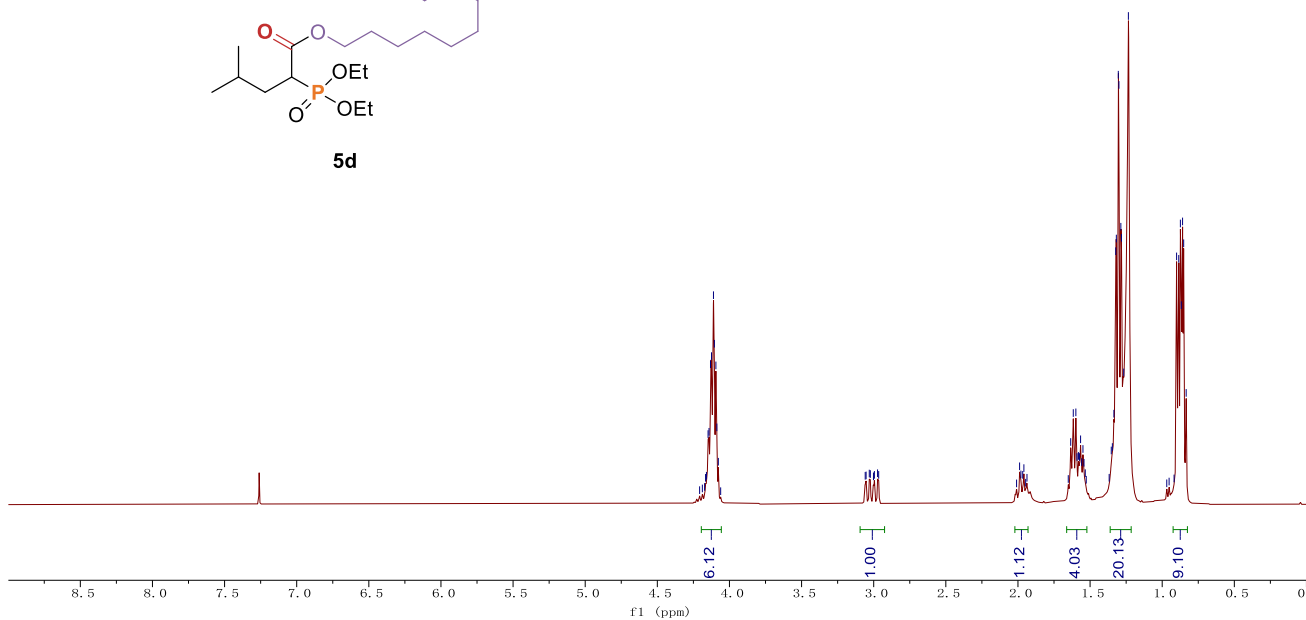

13C NMR CDCl3 100.62MHz

169.5  
169.4

— 77.0 CDCl3

65.4  
62.6  
62.6  
62.5  
44.6  
43.3  
35.5  
35.4  
31.8  
29.4  
29.2  
29.1  
28.5  
27.0  
26.8  
25.8  
22.9  
21.1  
16.4  
16.3  
16.3  
14.0

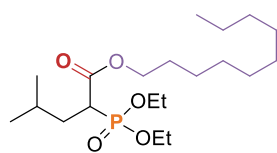

5d

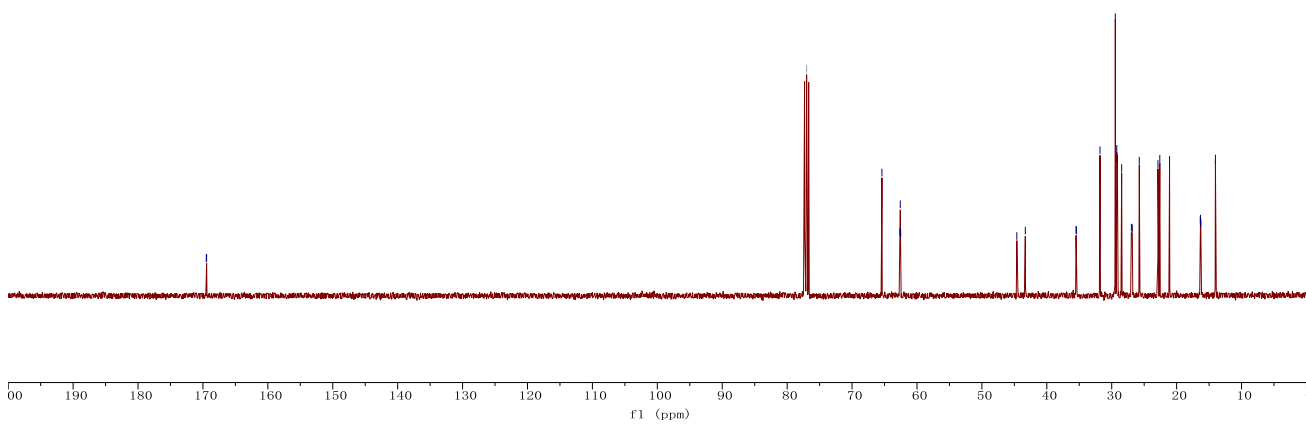

31P NMR CDCl3 161.97MHz

— 23.49

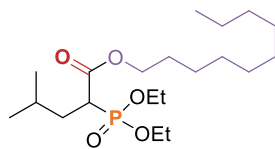

**5d**

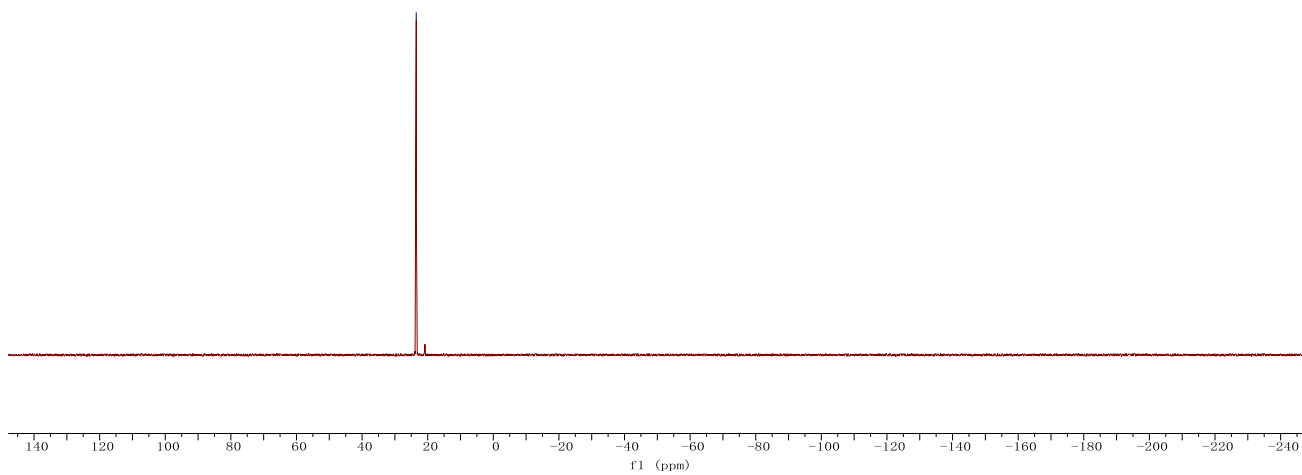

1H NMR CDCl3 400.13MHz

4.17  
4.16  
4.15  
4.14  
4.14  
4.14  
4.13  
4.12  
4.11  
4.10  
4.09  
4.08  
4.07  
2.94  
2.93  
2.91  
2.90  
2.88  
2.87  
2.85  
2.84  
1.98  
1.98  
1.97  
1.97  
1.96  
1.95  
1.95  
1.94  
1.93  
1.93  
1.92  
1.92  
1.91  
1.84  
1.84  
1.83  
1.82  
1.81  
1.81  
1.80  
1.80  
1.79  
1.79  
1.65  
1.65  
1.63  
1.61  
1.61  
1.60  
1.60  
1.58  
1.58  
1.36  
1.35  
1.34  
1.32  
1.32  
1.31  
1.31  
1.30  
1.30  
1.29  
1.28  
1.28  
1.26  
1.26  
1.24  
1.24  
1.23  
1.23  
0.88  
0.88  
0.87  
0.87  
0.84  
0.84

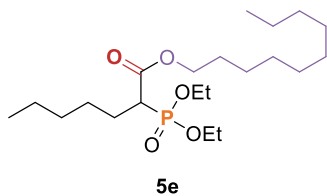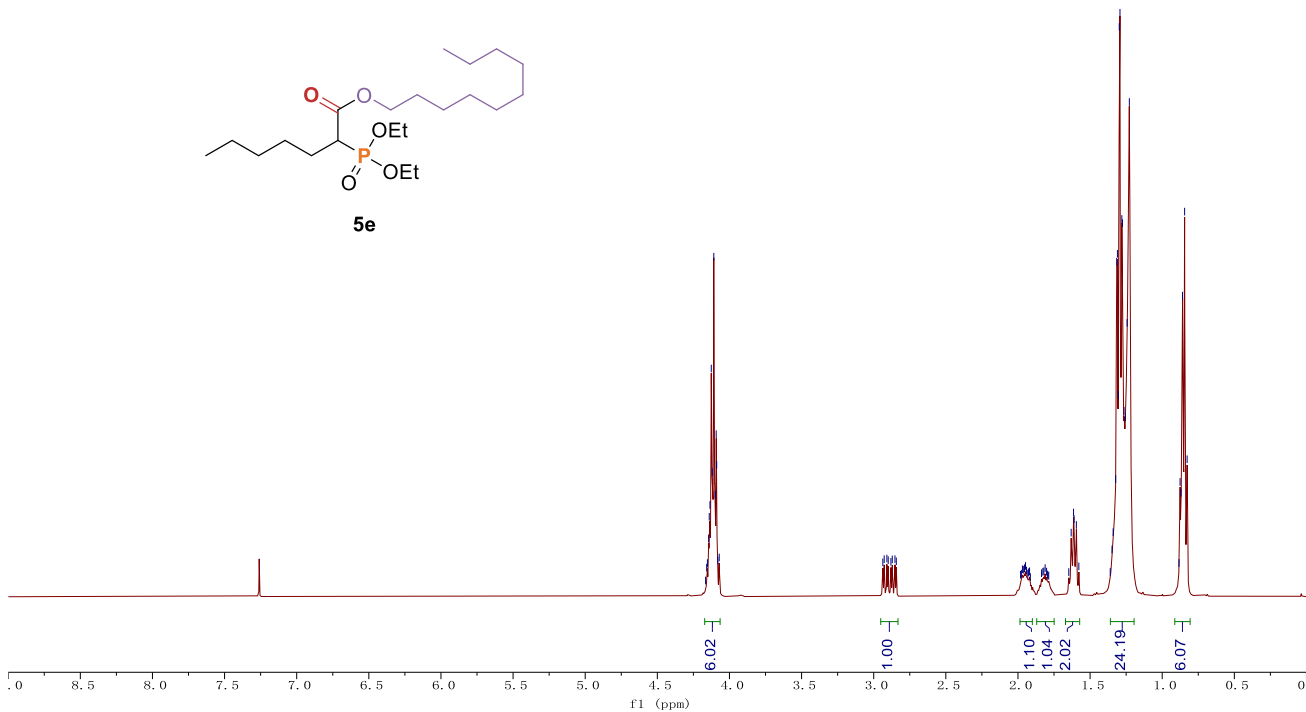

13C NMR CDCl3 100.62MHz

169.4  
169.3

77.0 CDCl3

65.4  
62.6  
62.5  
62.5  
46.4  
45.1  
31.8  
30.6  
30.4  
29.4  
29.2  
29.1  
28.5  
26.7  
26.6  
25.7  
22.6  
22.2  
16.3  
16.3  
16.3  
14.0  
13.7

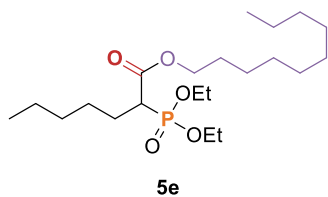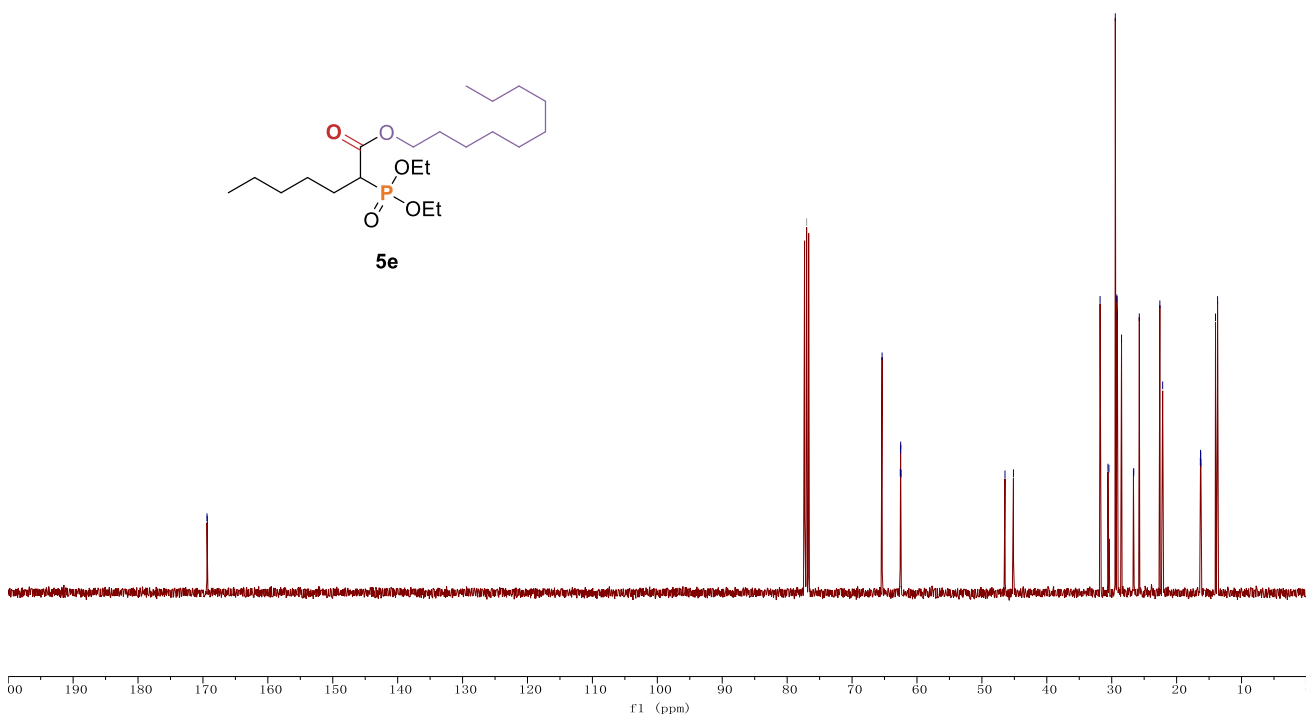

31P NMR CDCl3 161.97MHz

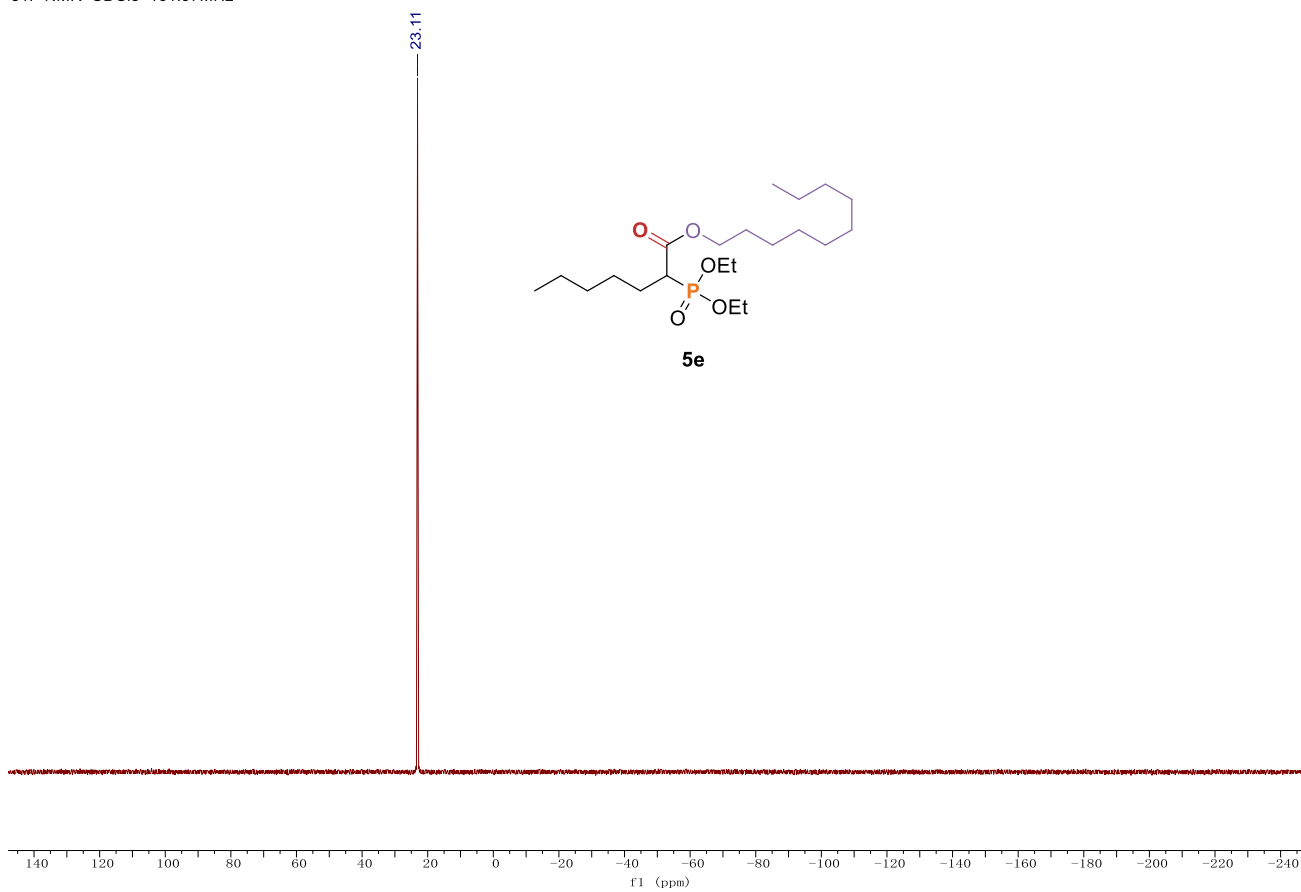



1H NMR CDCl3 400.13MHz

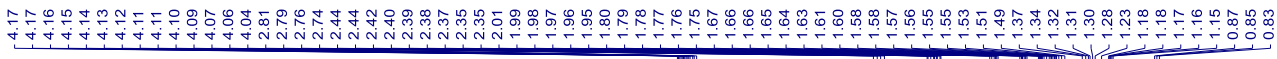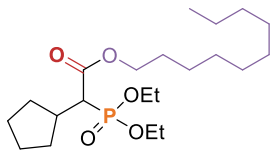

5f

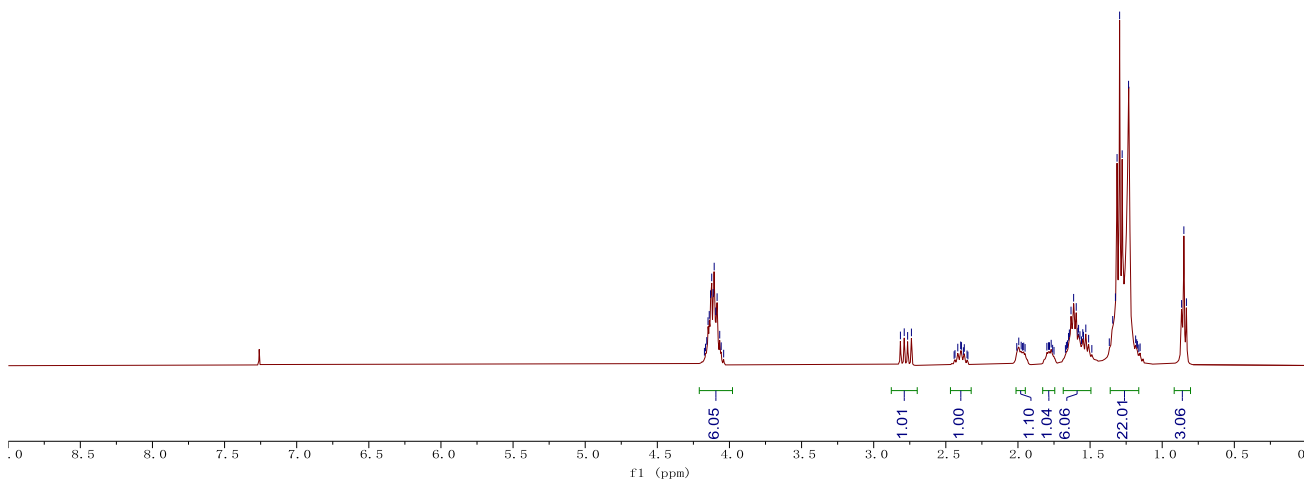

13C NMR CDCl3 100.62MHz

169.5  
169.4

77.0 CDCl3

65.3  
62.4  
62.3  
62.3  
52.0  
50.7  
38.9  
31.8  
31.4  
29.4  
29.2  
29.1  
28.5  
25.8  
24.9  
24.2  
22.6  
16.4  
16.3  
14.0

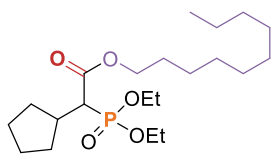

5f

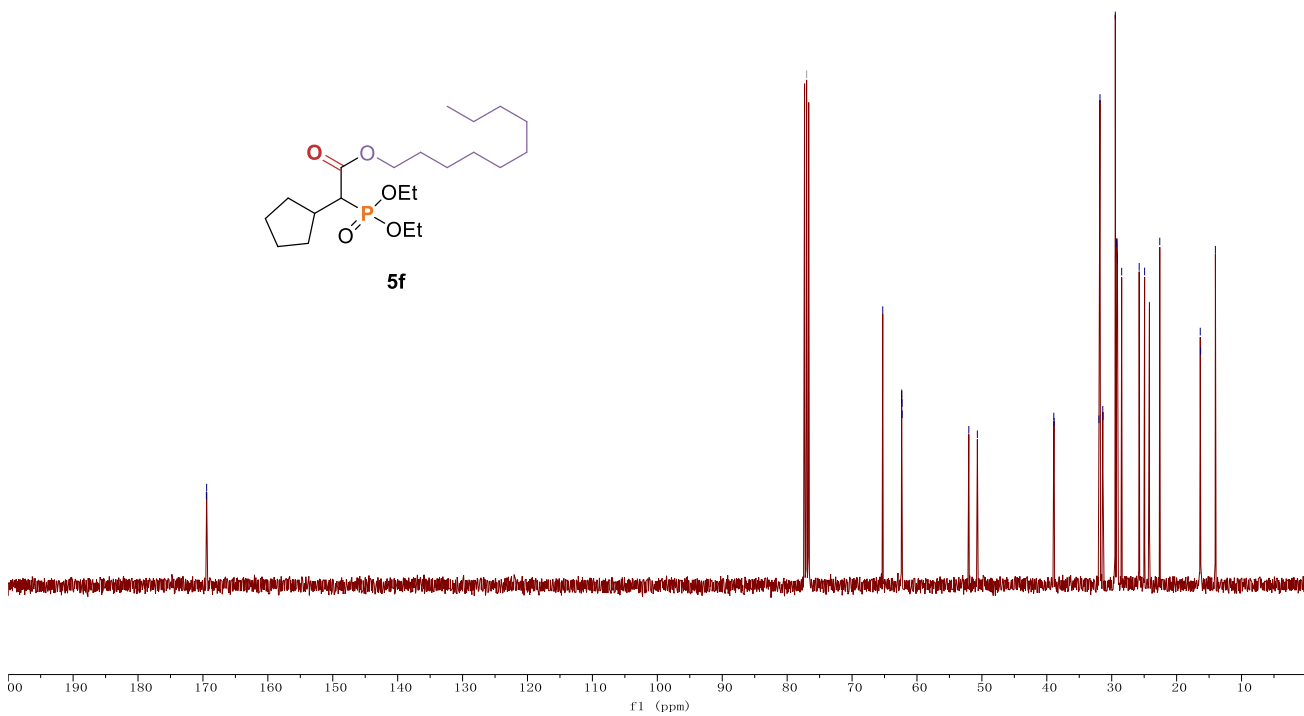

31P NMR CDCl3 161.97MHz

— 22.45

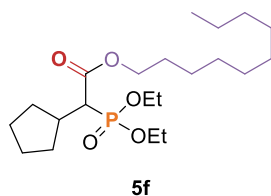

1H NMR CDCl3 400.13MHz

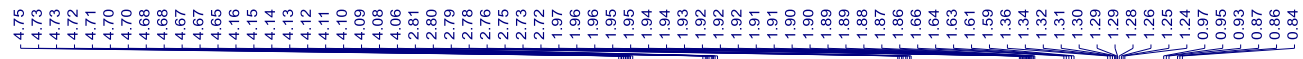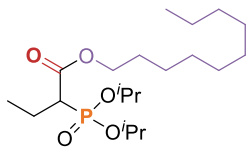

5g

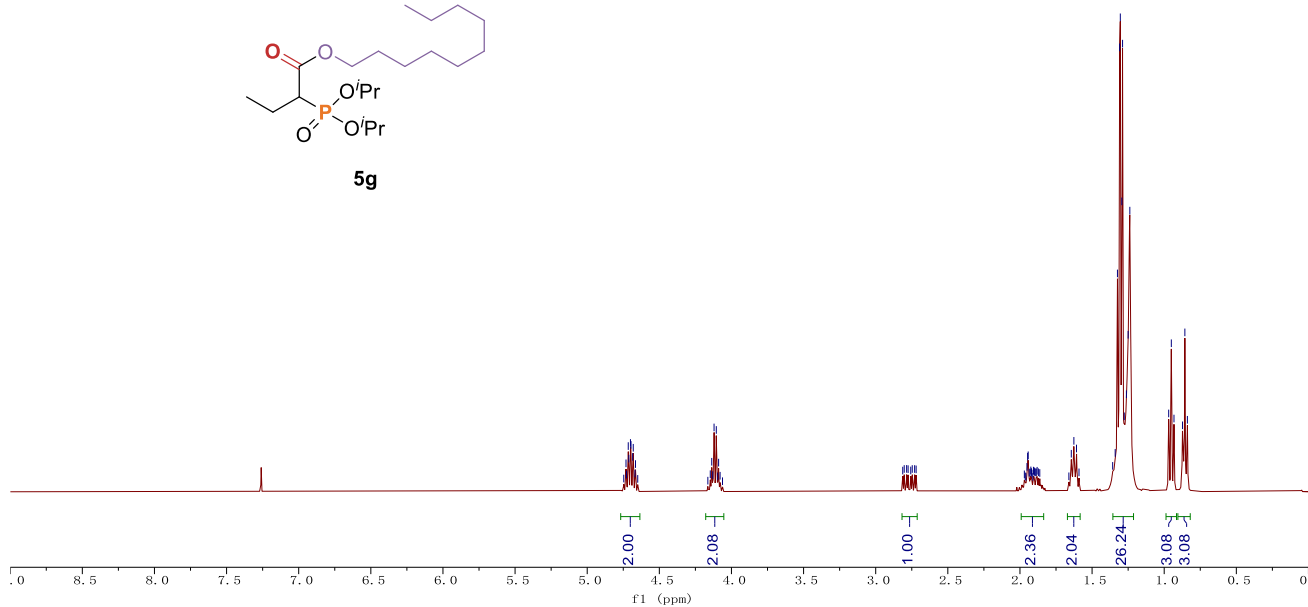

13C NMR CDCl3 100.62MHz

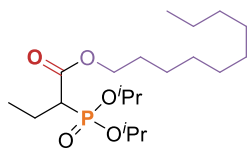

5g

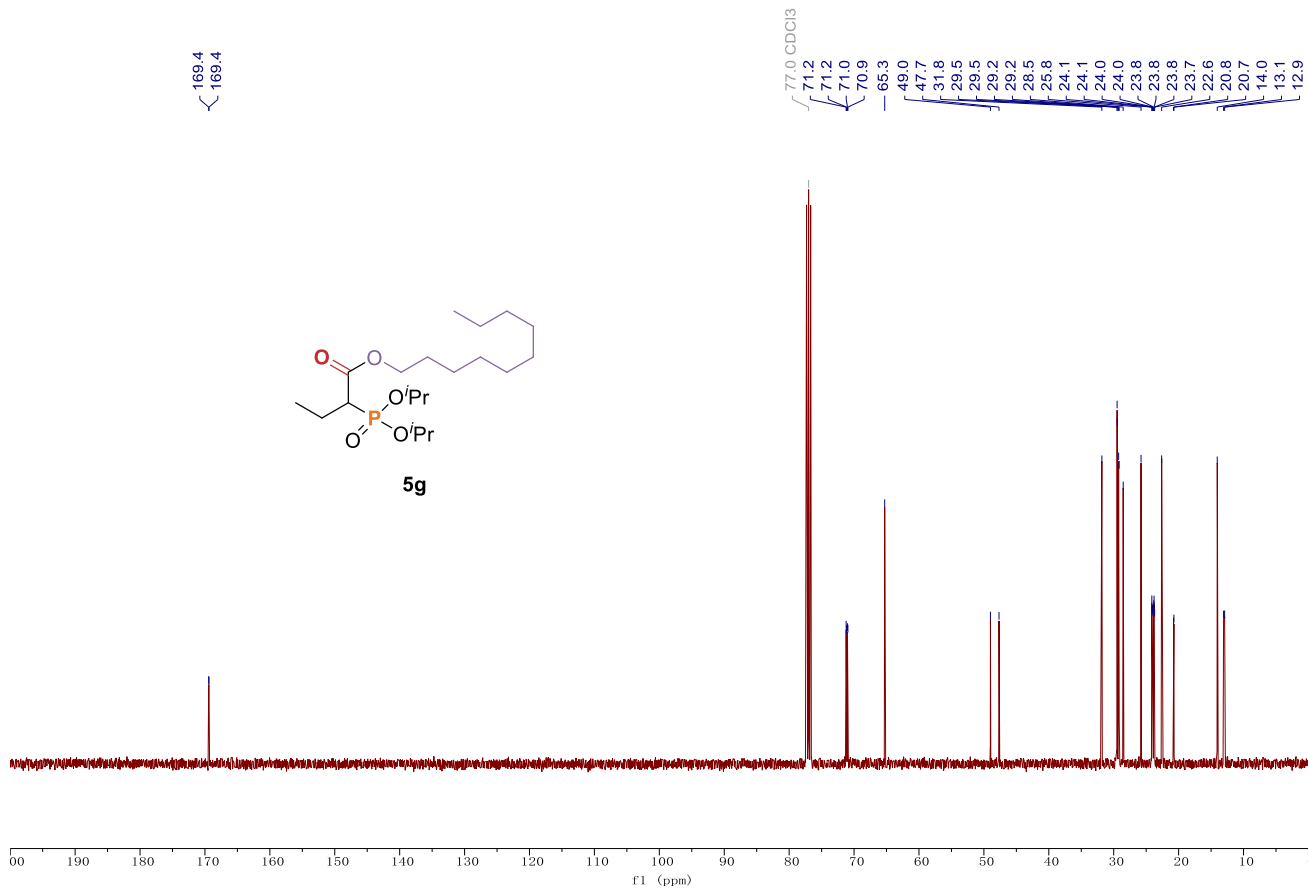

31P NMR CDCl3 161.97MHz

— 20.75

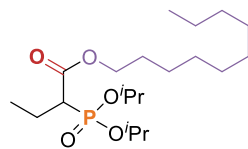

5g



1H NMR CDCl3 400.13MHz

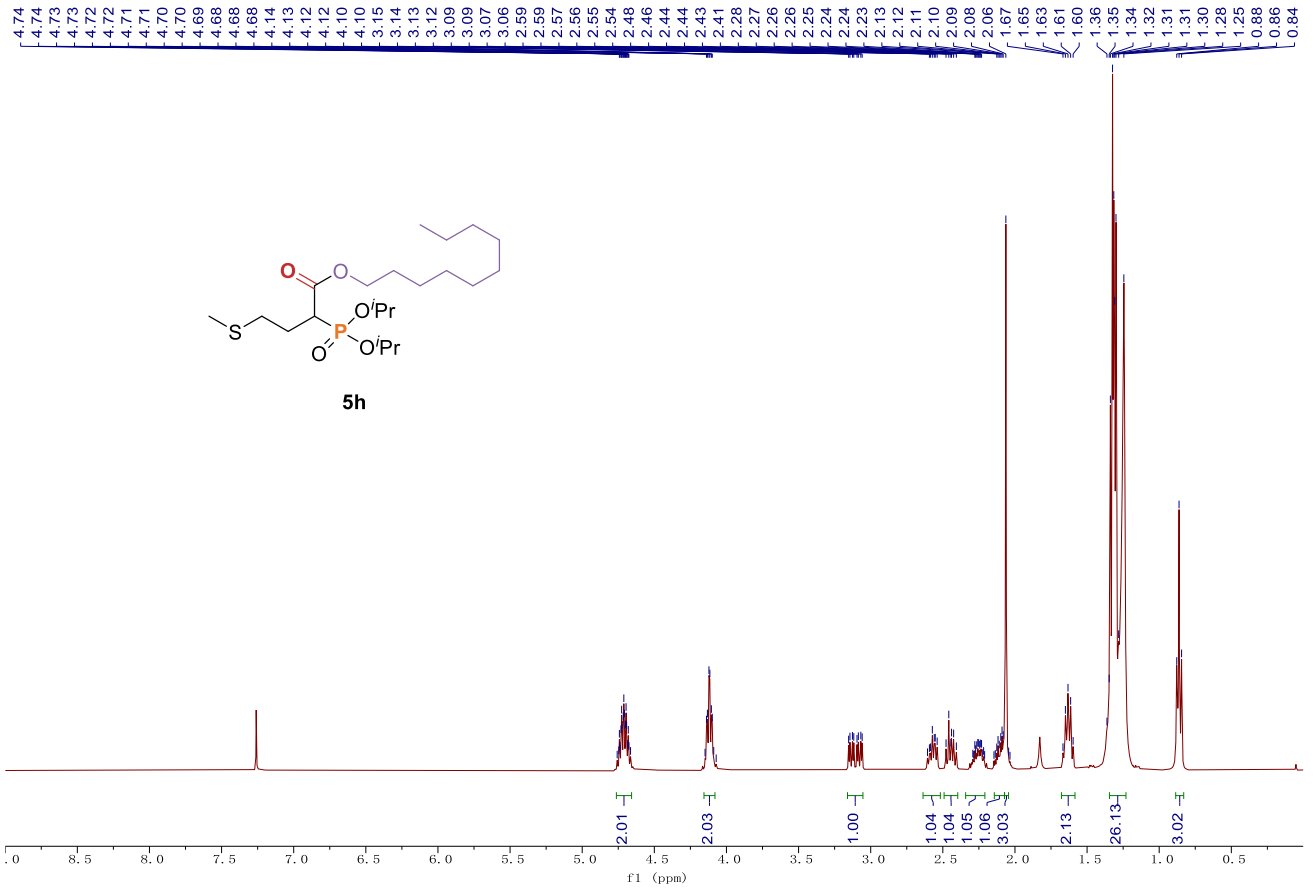

13C NMR CDCl3 100.62MHz

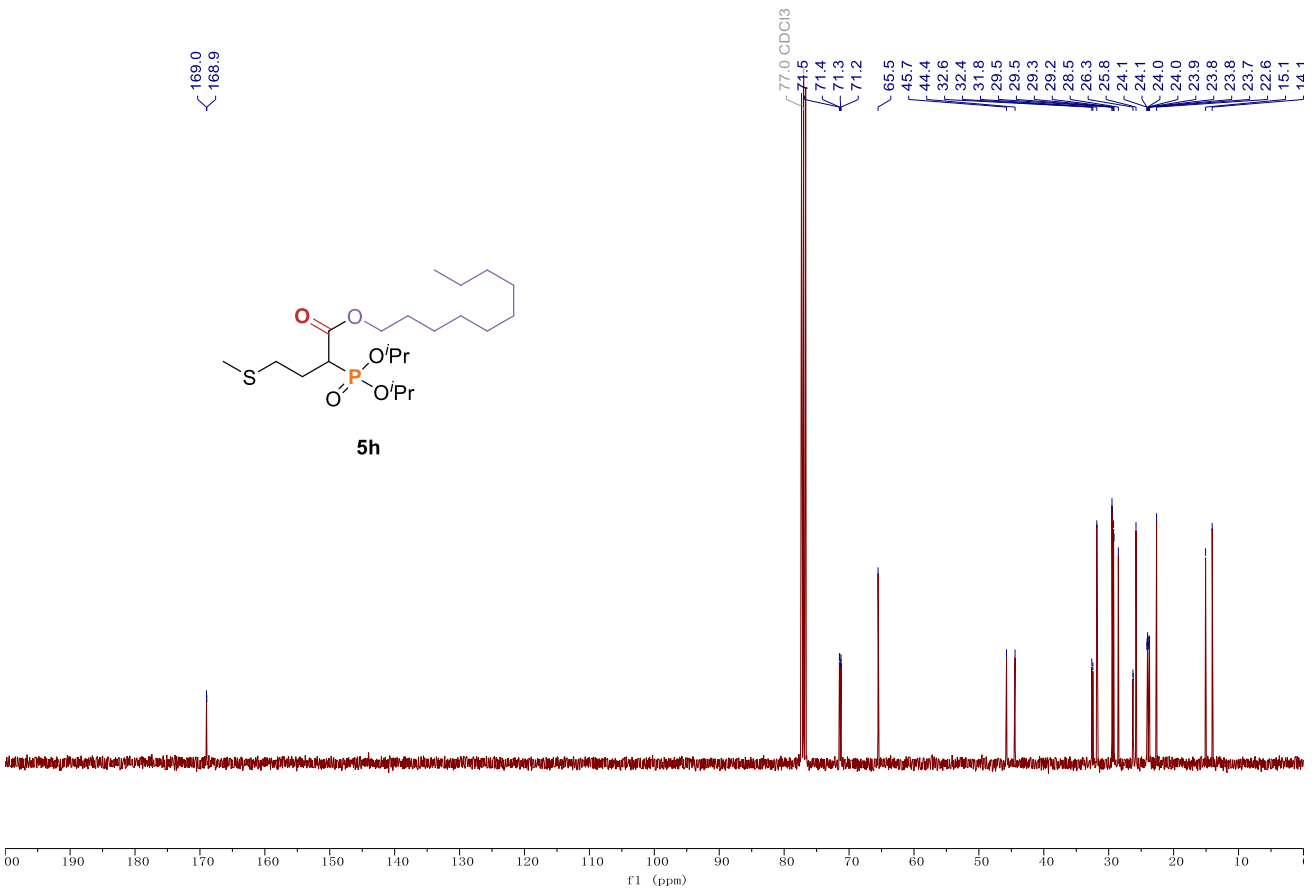

31P NMR CDCl3 161.97MHz

— 20.27

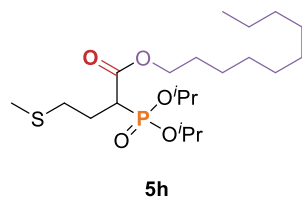

1H NMR CDCl3 400.13MHz

4.73  
4.71  
4.71  
4.70  
4.69  
4.68  
4.66  
4.13  
4.12  
4.11  
4.11  
4.10  
4.09  
4.08  
3.51  
3.51  
3.50  
3.49  
3.48  
2.88  
2.87  
2.86  
2.85  
2.83  
2.82  
2.80  
2.79  
1.96  
1.95  
1.94  
1.83  
1.81  
1.80  
1.80  
1.79  
1.78  
1.76  
1.76  
1.75  
1.74  
1.64  
1.62  
1.61  
1.61  
1.59  
1.49  
1.48  
1.47  
1.47  
1.46  
1.46  
1.45  
1.45  
1.43  
1.43  
1.36  
1.34  
1.32  
1.31  
1.30  
1.30  
1.29  
1.28  
1.28  
1.26  
1.25  
1.24  
1.24  
0.87  
0.85  
0.84

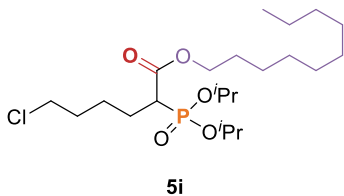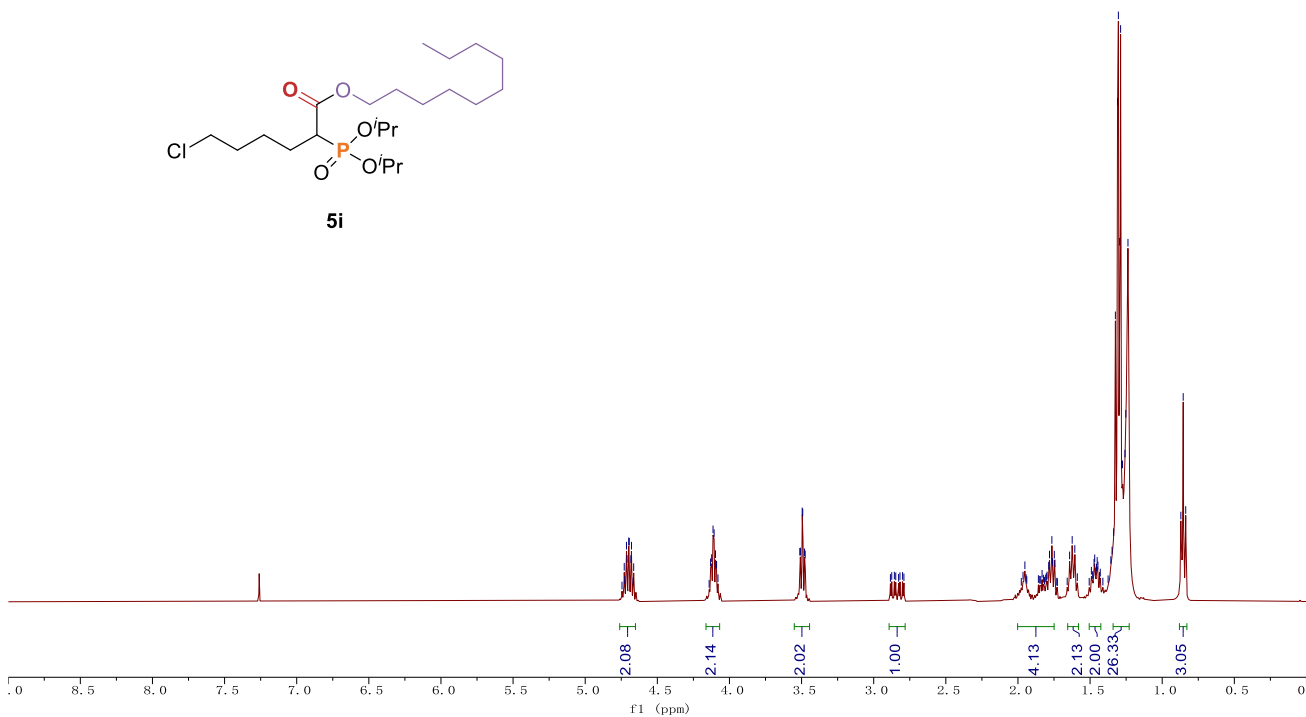

13C NMR CDCl3 100.62MHz

169.3  
169.2

77.0 CDCl3

71.4  
71.3  
71.2  
71.1  
65.4  
47.1  
44.4  
44.4  
32.0  
31.8  
29.5  
29.5  
29.2  
29.2  
28.5  
28.4  
26.4  
26.4  
25.8  
25.6  
24.1  
24.1  
24.0  
23.9  
23.8  
23.8  
23.7  
23.7  
22.6  
22.6  
14.0

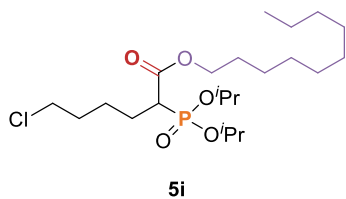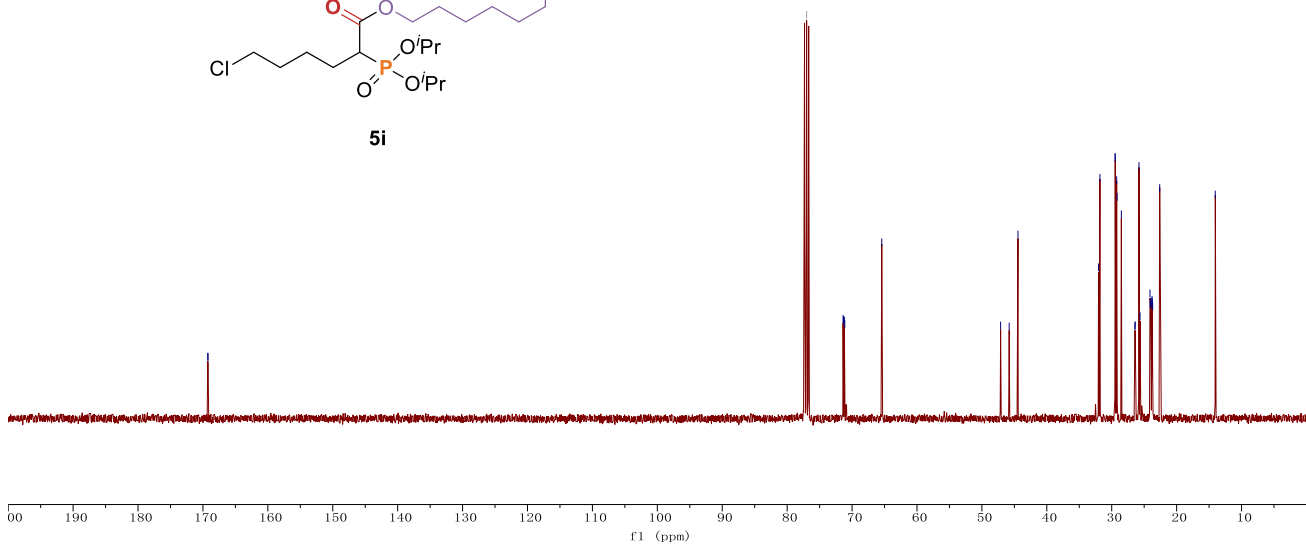

31P NMR CDCl3 161.97MHz

20.45

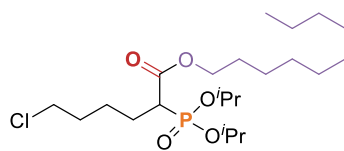

5i

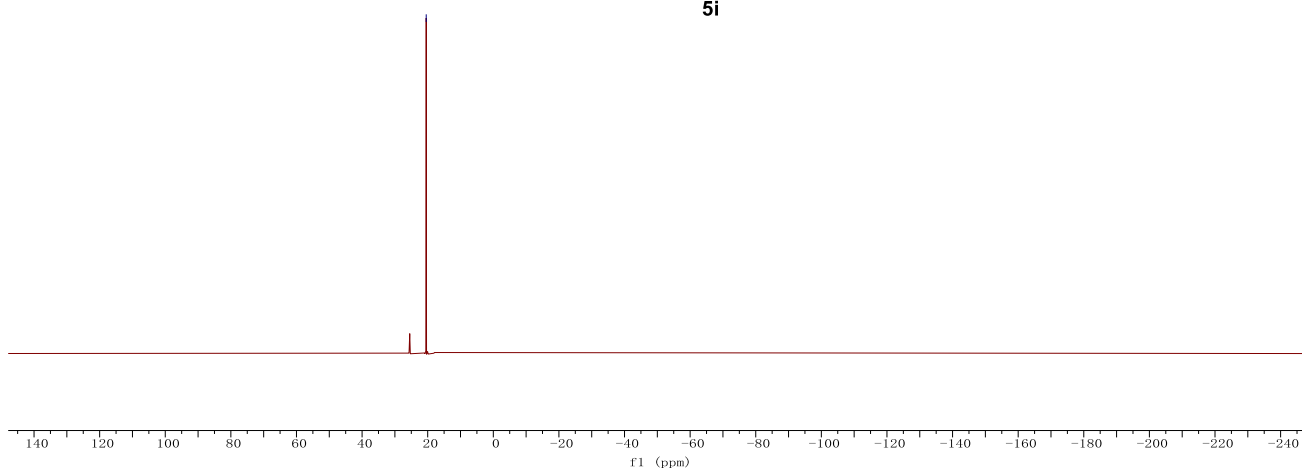



1H NMR CDCl3 400.13MHz

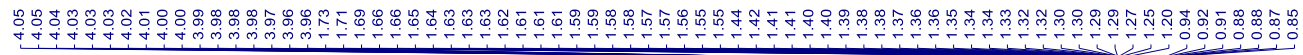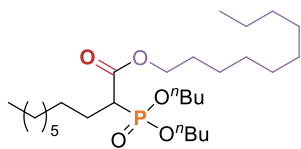

5j

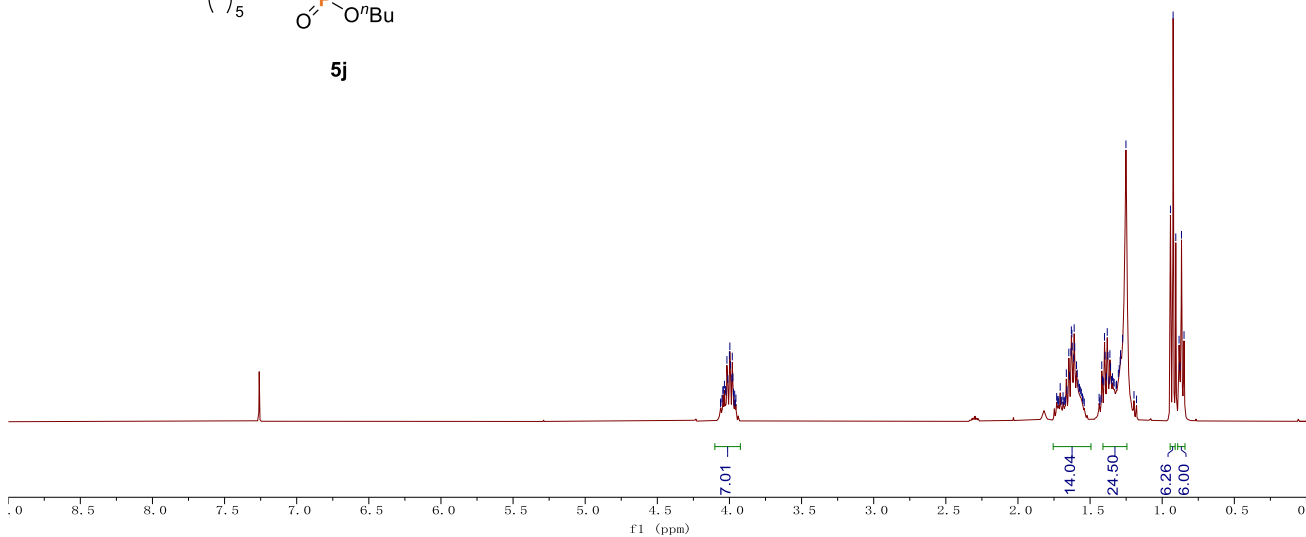

13C NMR CDCl3 100.62MHz

176.4

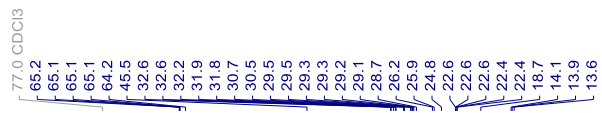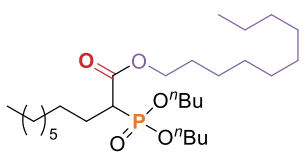

5j

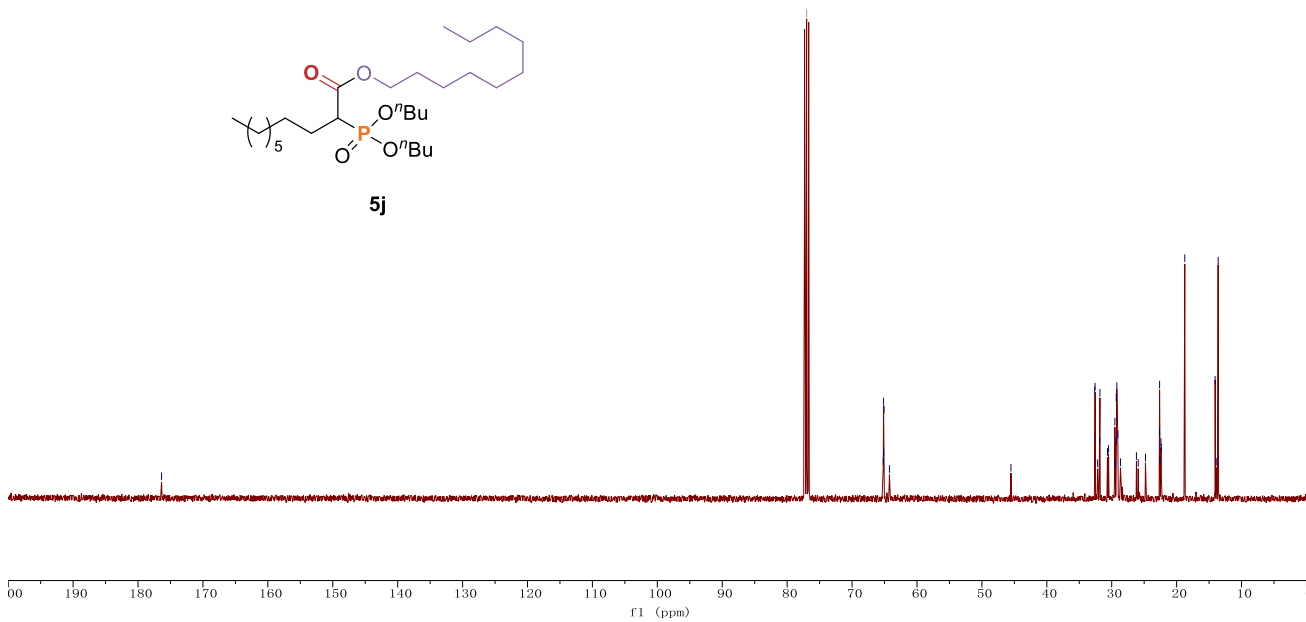

31P NMR CDCl3 161.97MHz

20.64

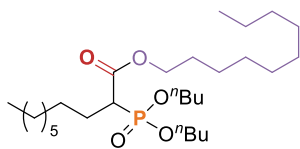

5j

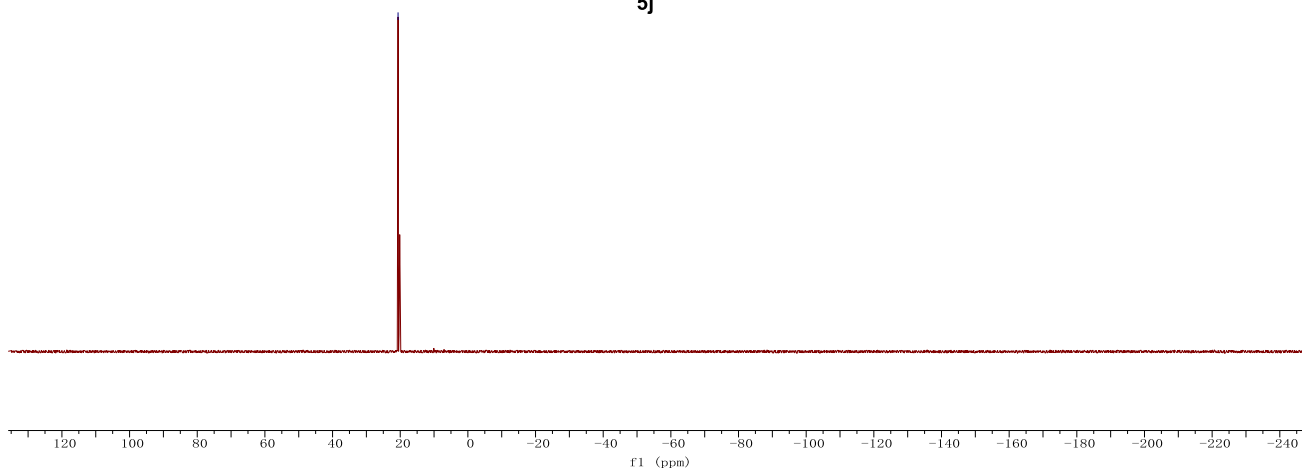

1H NMR CDCl3 400.13MHz

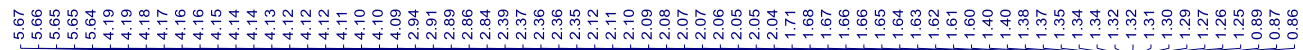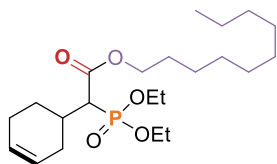

5k

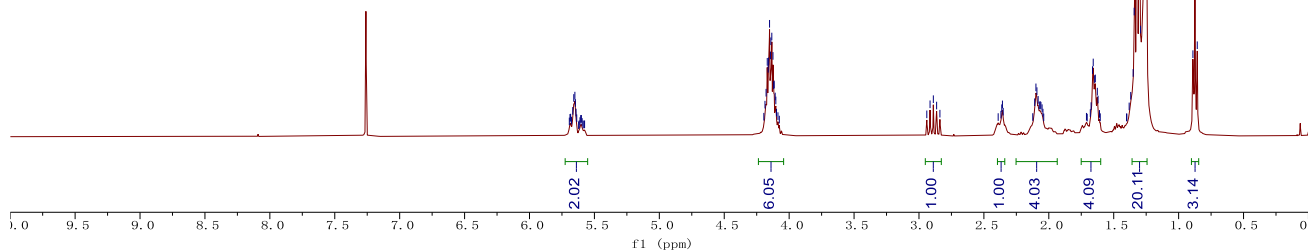

13C NMR CDCl3 176.08MHz

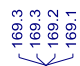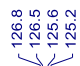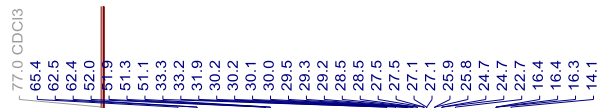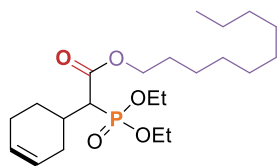

5k

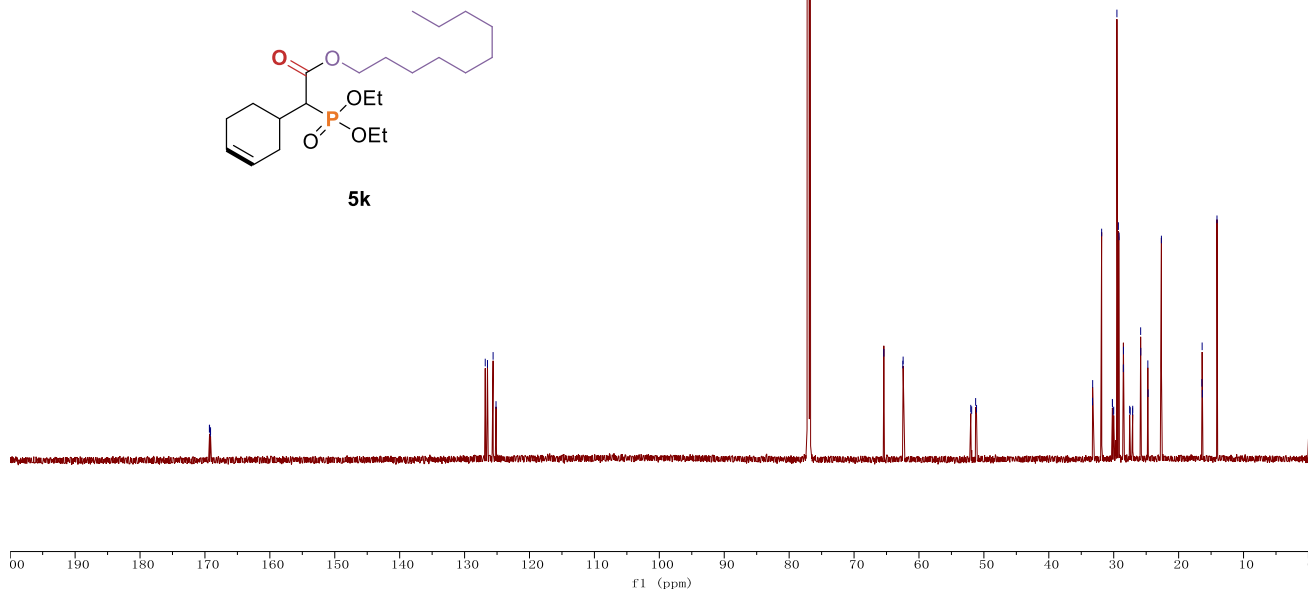

31P NMR CDCl3 161.97MHz

22.43  
22.36

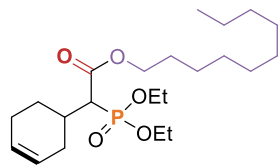

5k

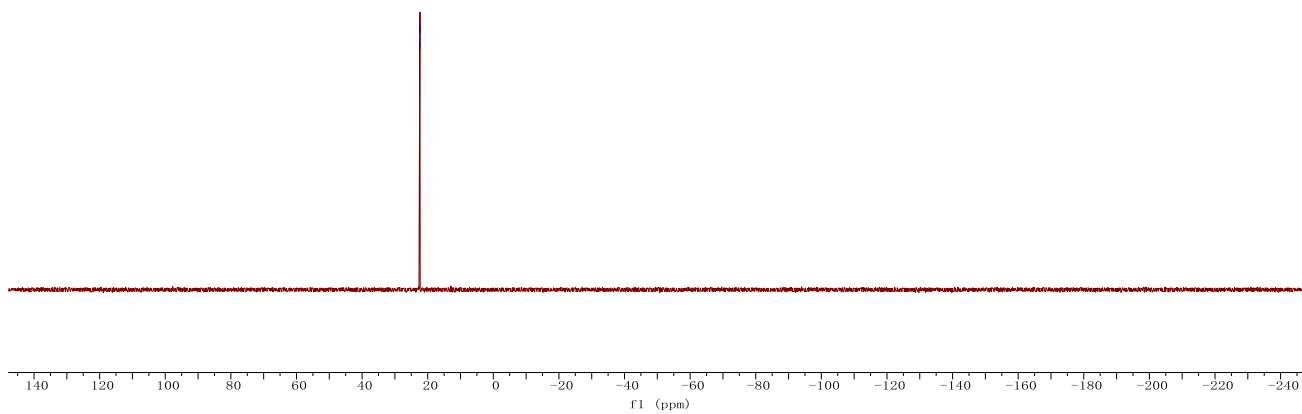

1H NMR CDCl3 400.13MHz

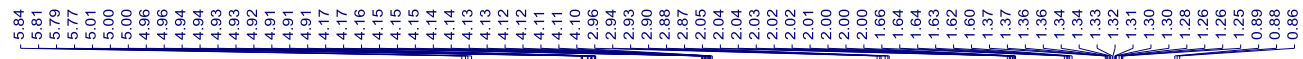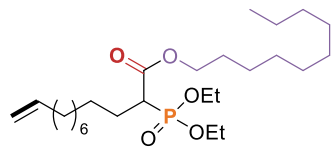

5I

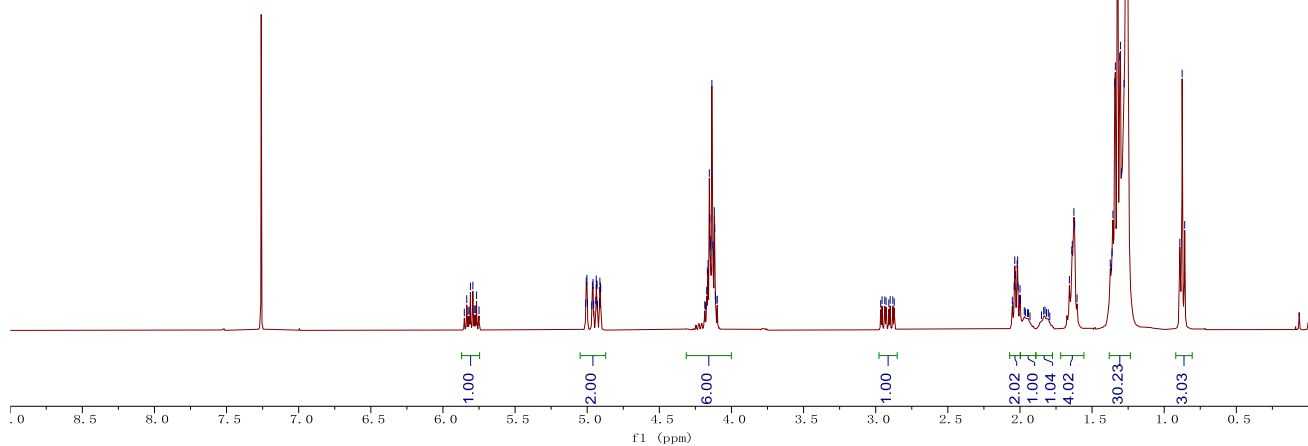

13C NMR CDCl3 176.08MHz

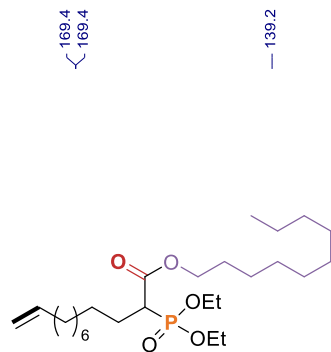

5I

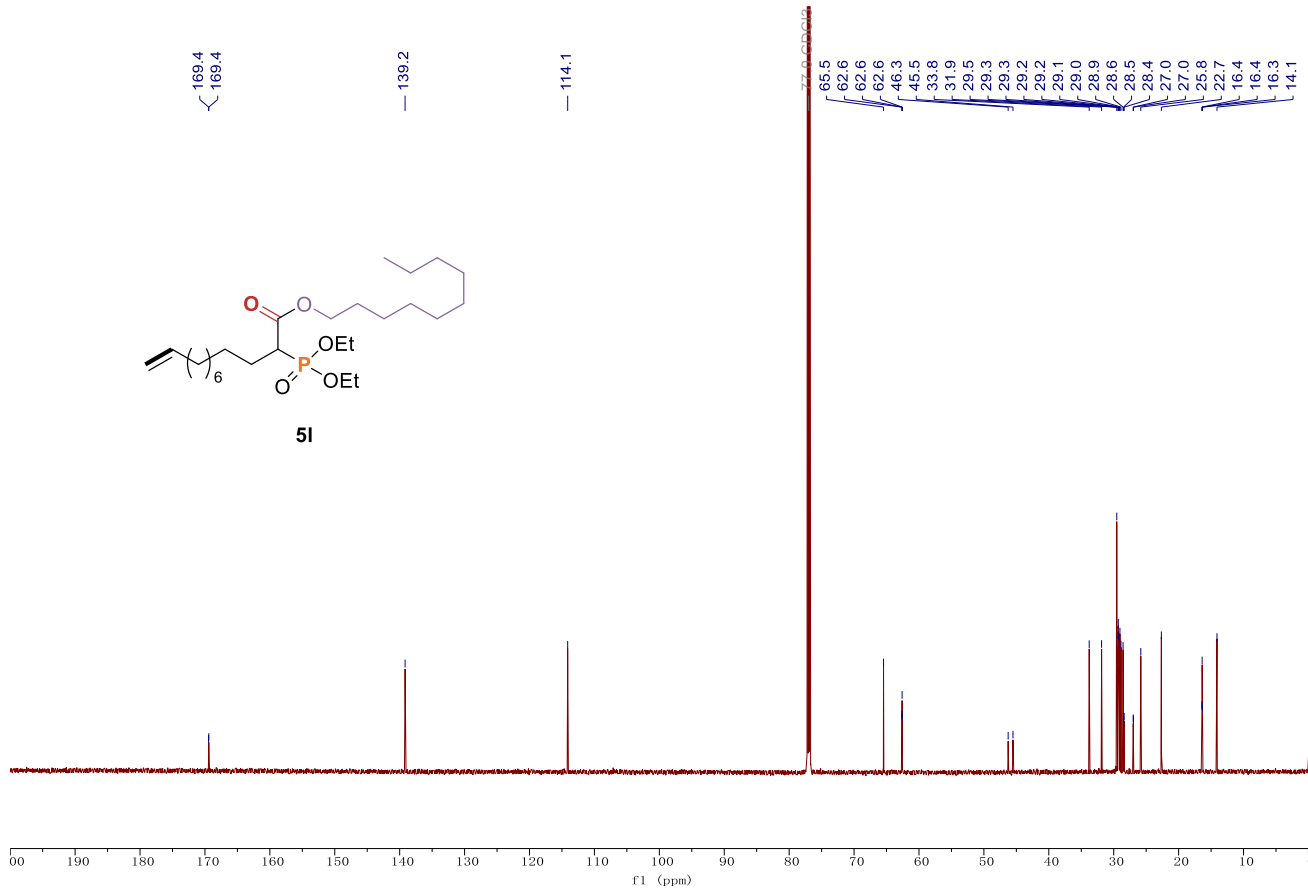

31P NMR CDCl3 161.97MHz

— 23.06

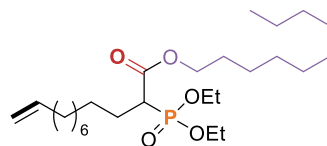

5I

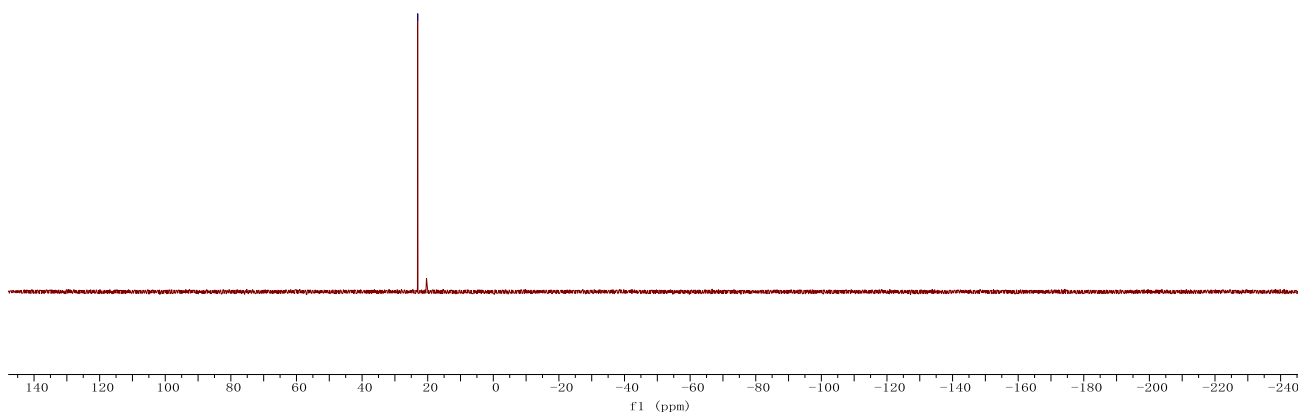

1H NMR CDCl3 400.13MHz

7.82  
7.80  
7.80  
7.79  
7.77  
7.77  
7.57  
7.56  
7.55  
7.54  
7.53  
7.53  
7.50  
7.49  
7.48  
7.47  
7.46  
7.46  
7.45

3.94  
3.92  
3.91  
3.51  
3.47

1.39  
1.37  
1.36  
1.34  
1.29  
1.28  
1.26  
1.25  
1.24  
1.24  
1.23  
1.22  
1.19  
1.16  
1.15  
1.14  
1.12  
1.11  
0.89  
0.88

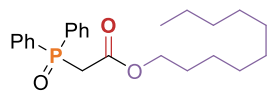

5m

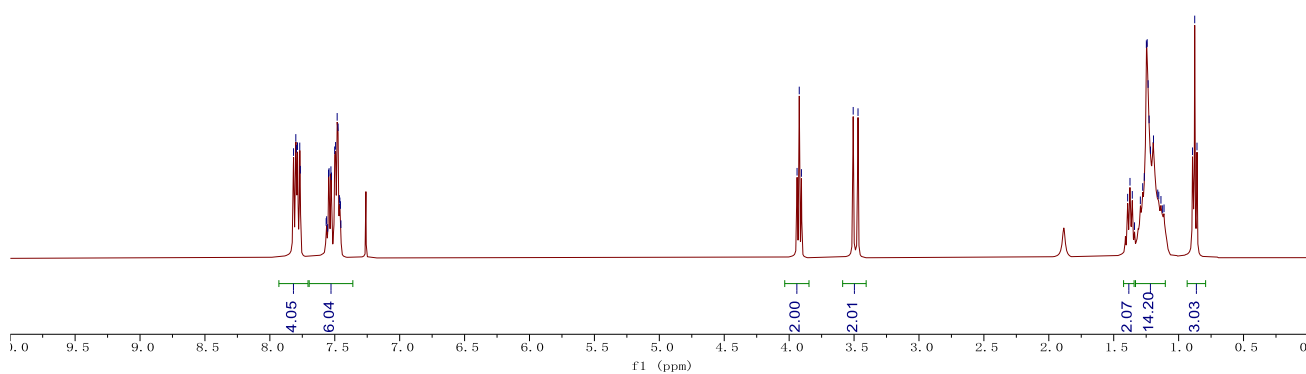

13C NMR CDCl3 176.08MHz

166.27

132.26  
132.24  
132.14  
131.55  
131.15  
131.10  
128.68  
128.61

65.82

39.36  
39.01  
31.89  
29.53  
29.45  
29.31  
29.18  
28.27  
25.68  
22.69  
14.13

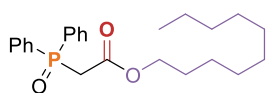

5m

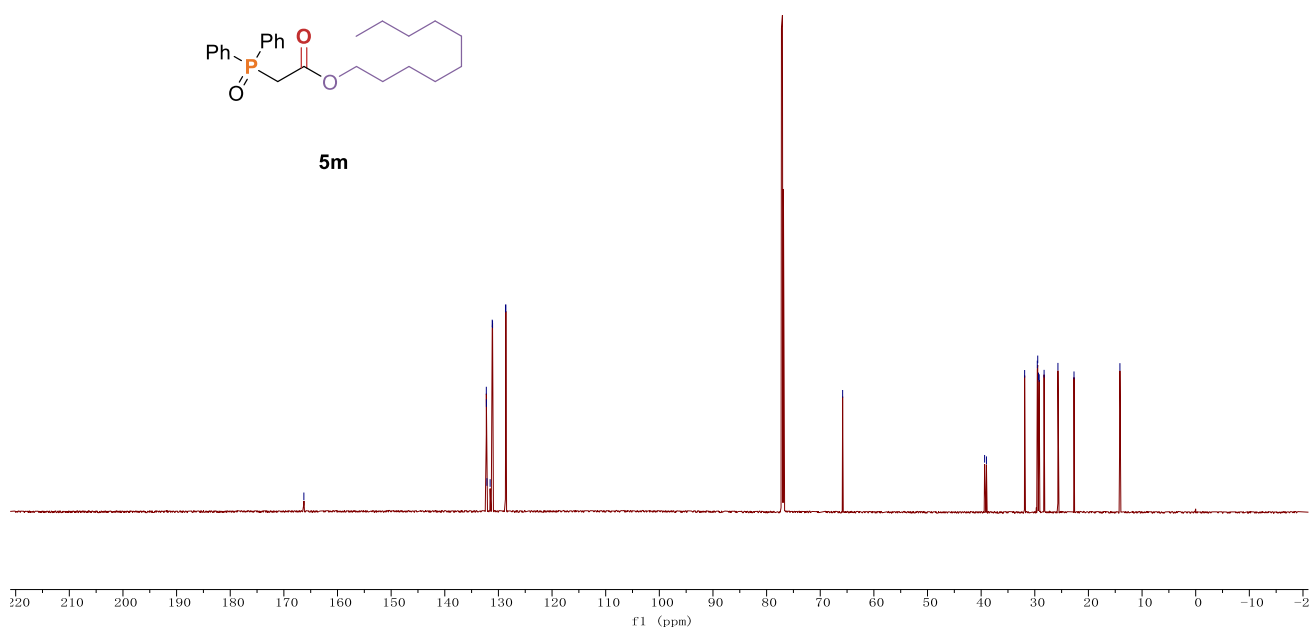

31P NMR CDCl3 161.97MHz

26.85

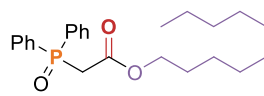

5m

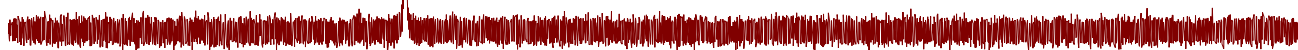

140 120 100 80 60 40 20 0 -20 -40 -60 -80 -100 -120 -140 -160 -180 -200 -220 -240  
f1 (ppm)



1H NMR CDCl3 400.13MHz

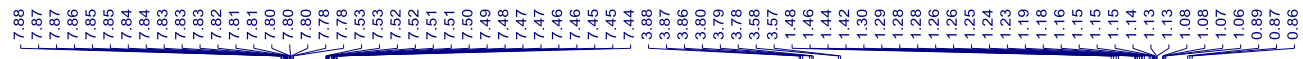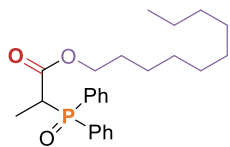

5n

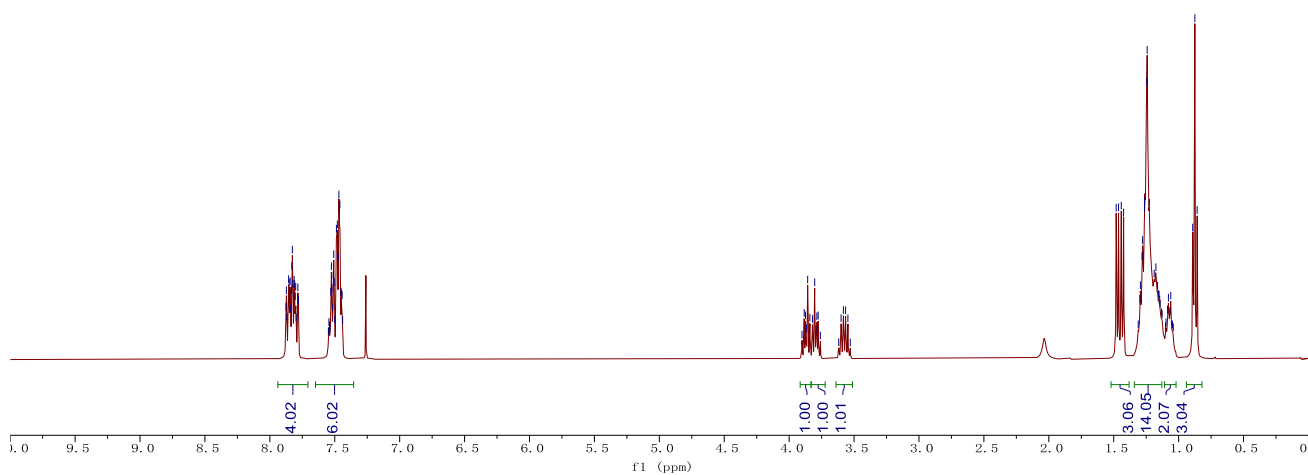

13C NMR CDCl3 100.62MHz

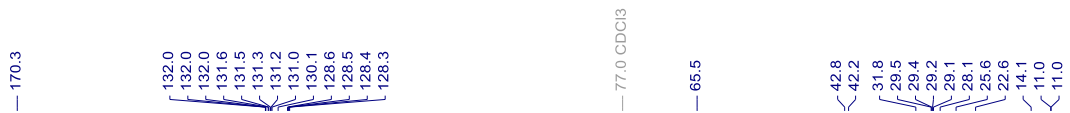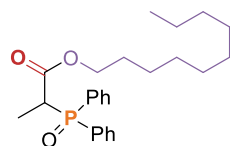

5n

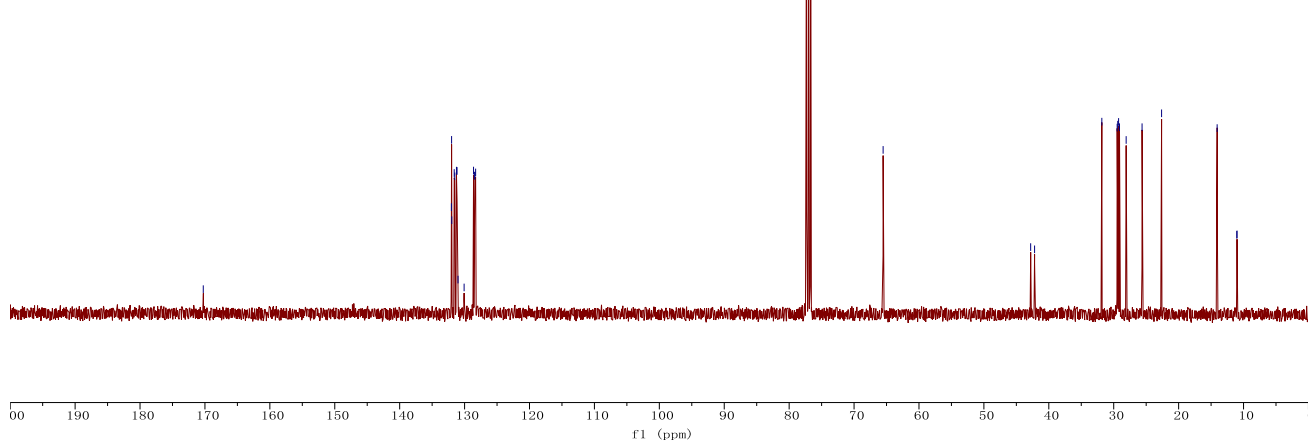

31P NMR CDCl3 161.97MHz

31.06

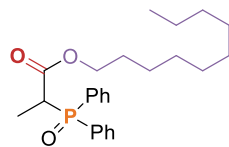

5n

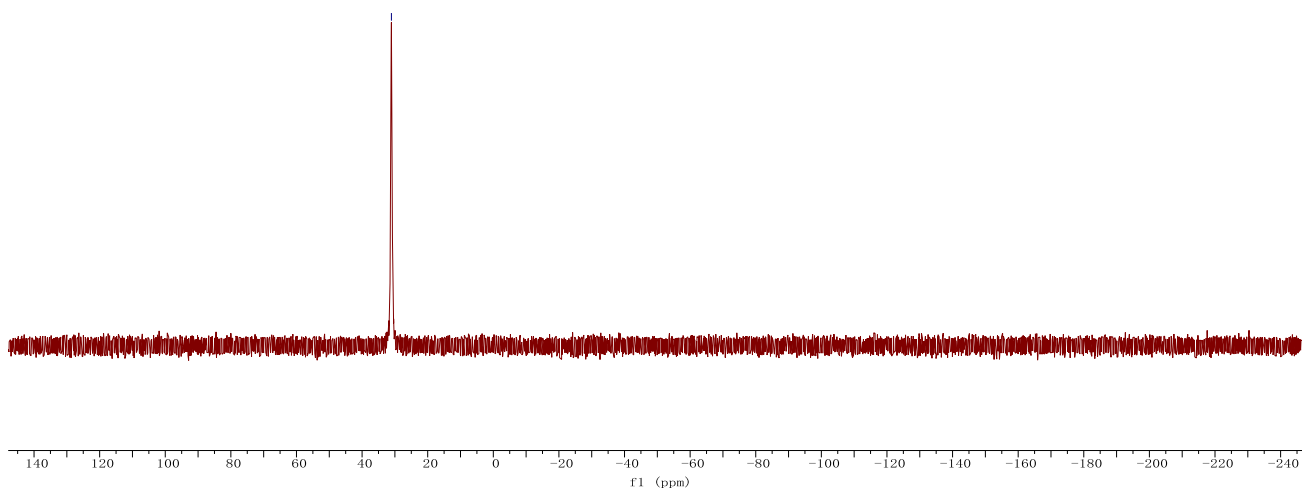

1H NMR CDCl3 400.13MHz

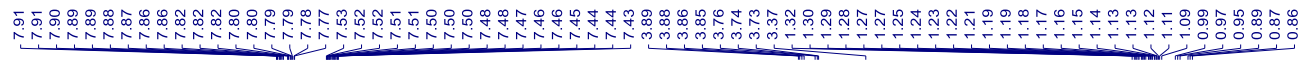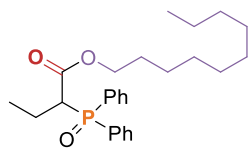

5o

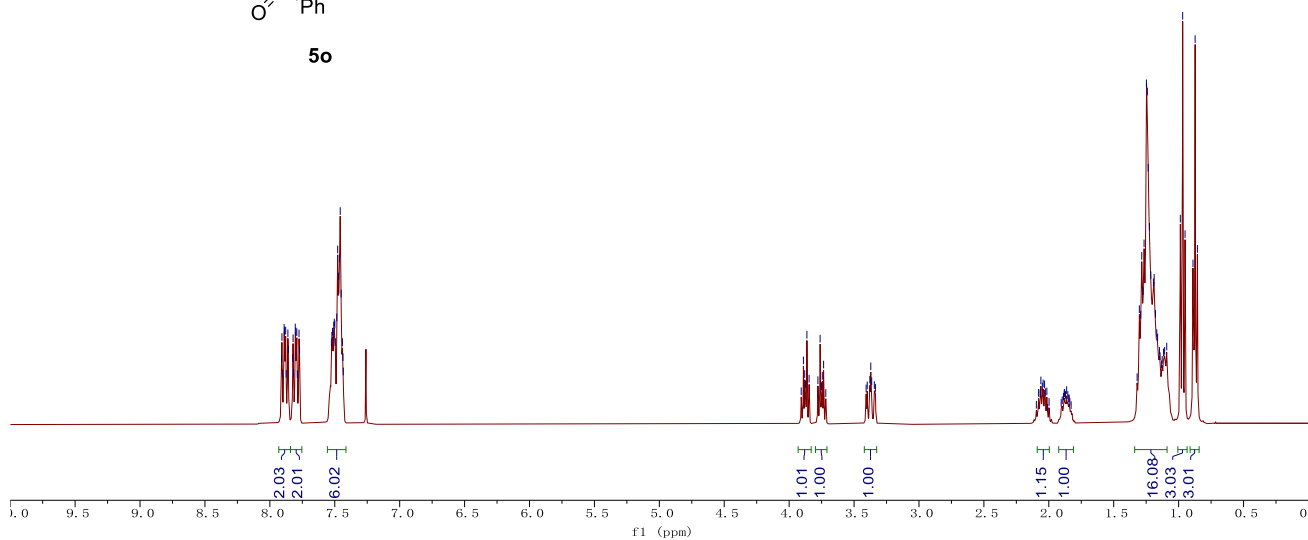

13C NMR CDCl3 100.62MHz

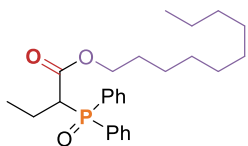

5o

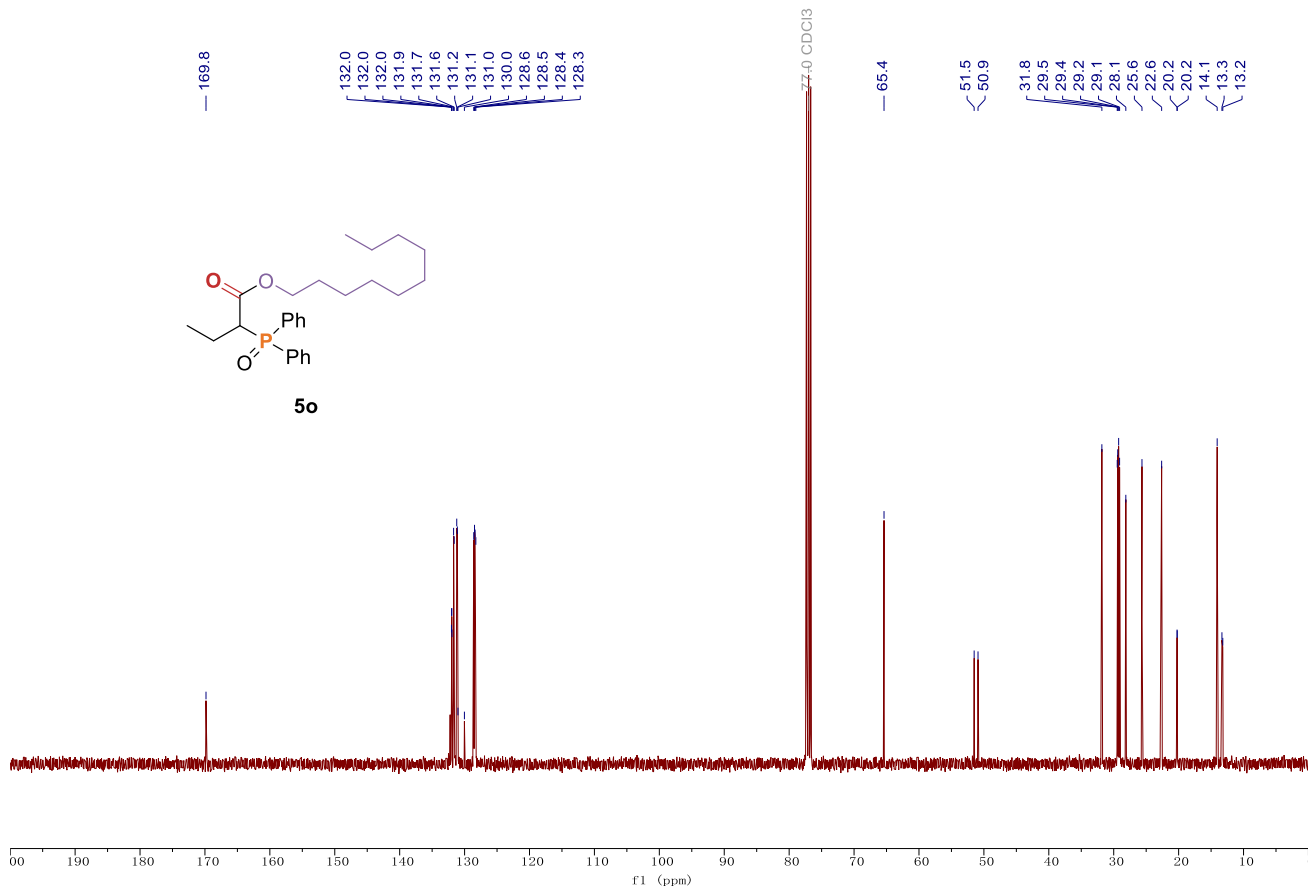

31P NMR CDCl3 161.97MHz

— 29.18

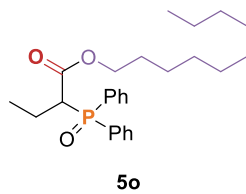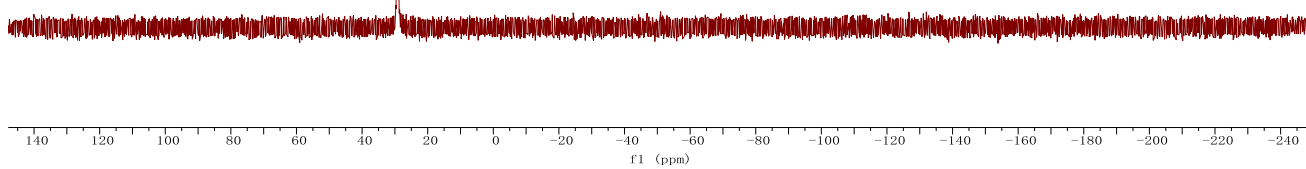

1H NMR CDCl3 400.13MHz

7.91 7.89 7.88 7.86 7.85 7.82 7.81 7.80 7.79 7.78 7.77 7.54 7.53 7.52 7.51 7.50 7.50 7.48 7.48 7.46 7.46 7.45 7.44 3.88 3.87 3.86 3.85 3.84 3.77 3.75 3.73 3.72 3.47 3.46 3.44 3.44 3.43 3.41 3.40 2.03 1.33 1.32 1.32 1.31 1.30 1.29 1.28 1.26 1.25 1.24 1.23 1.22 1.19 1.19 1.18 1.17 1.17 1.15 1.15 1.13 1.12 1.11 1.09 0.89 0.88 0.86 0.83 0.81 0.80

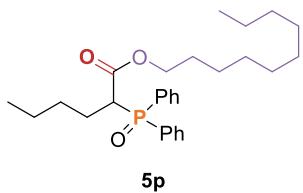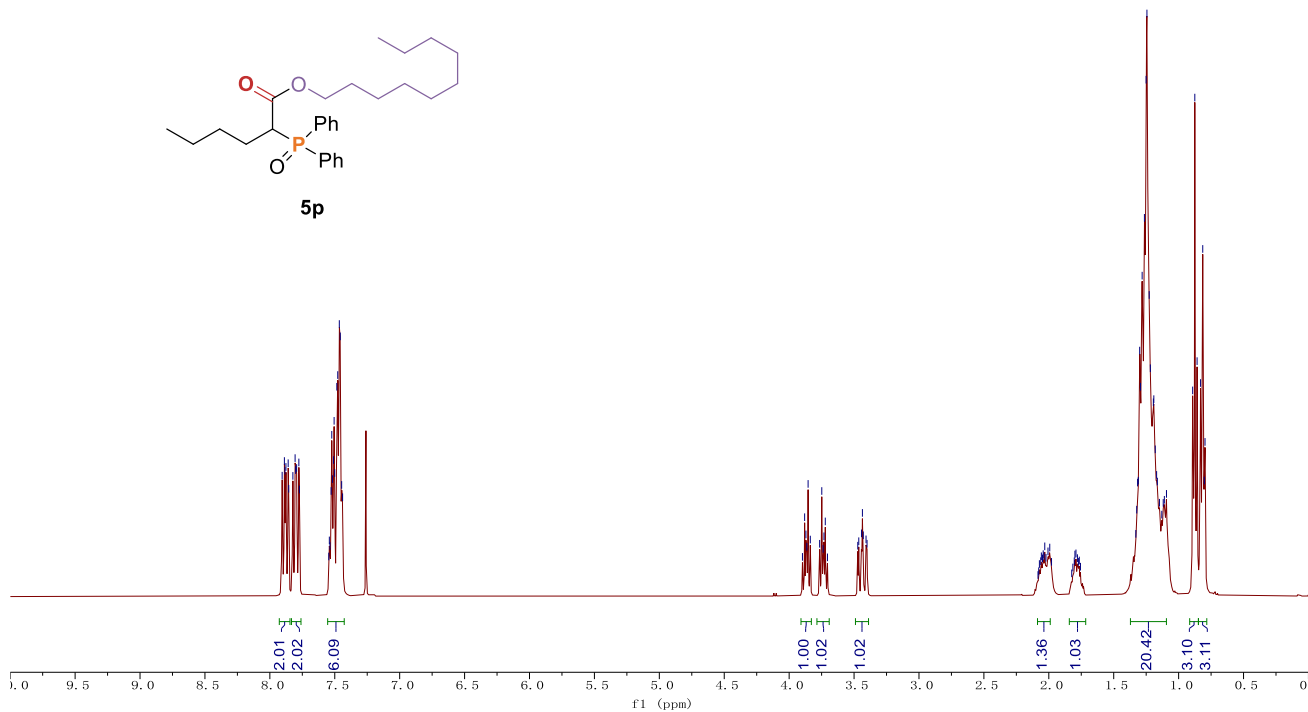

13C NMR CDCl3 100.62MHz

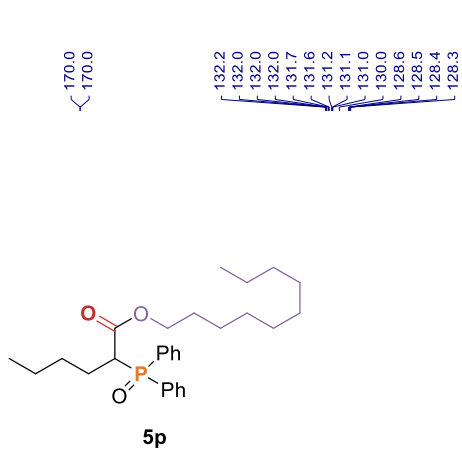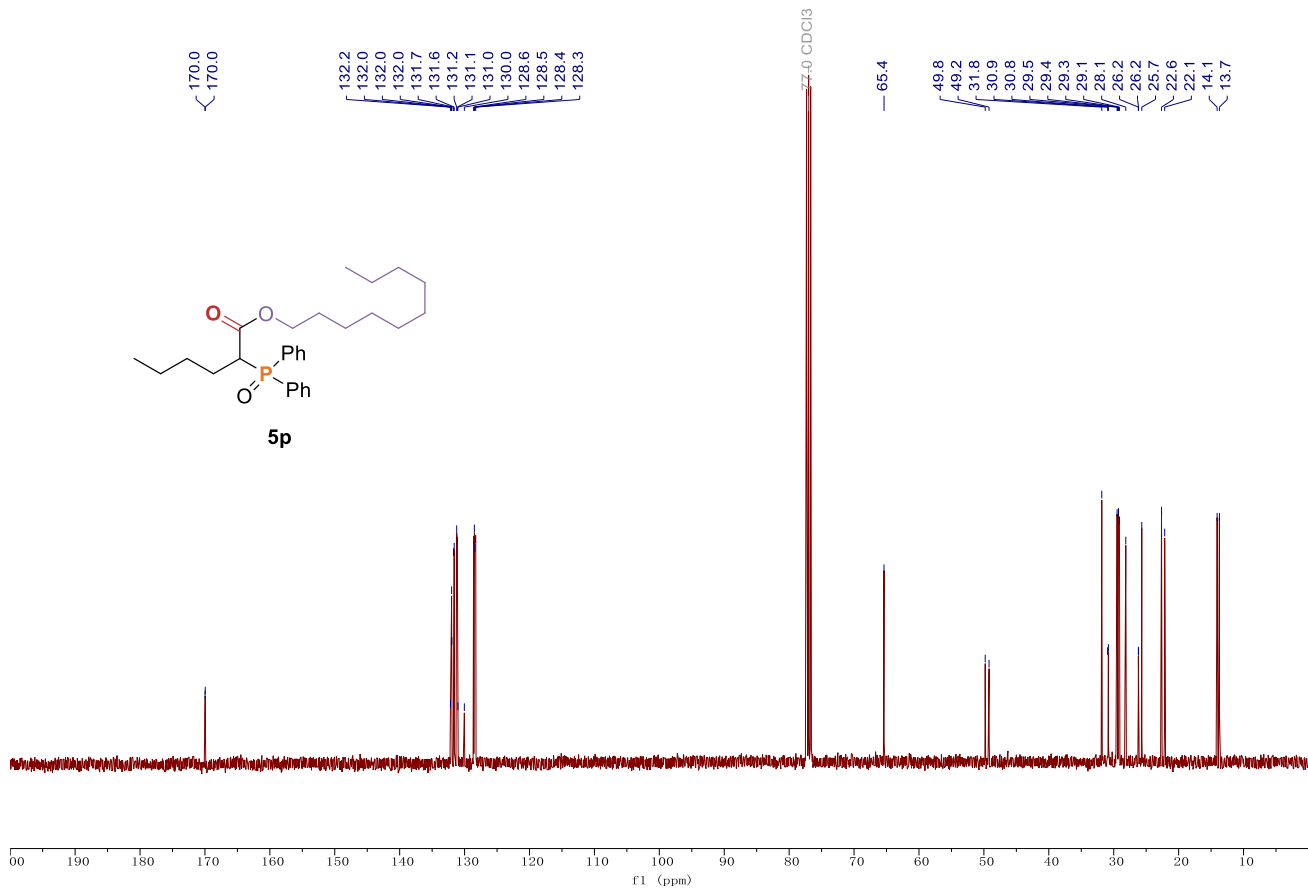

31P NMR CDCl3 161.97MHz

— 29.26

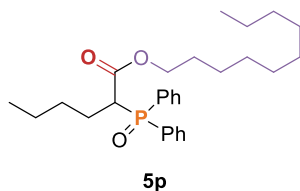

<sup>1</sup>H NMR CDCl<sub>3</sub> 400.13MHz

7.83, 7.83, 7.81, 7.80, 7.80, 7.78, 7.78, 7.70, 7.69, 7.66, 7.66, 7.53, 7.51, 7.50, 7.50, 7.49, 7.49, 7.46, 7.45, 7.45, 7.44, 7.44, 7.43, 7.43, 7.42, 7.41, 7.41, 7.27, 7.26, 7.25, 7.25, 7.24, 7.24, 7.21, 7.21, 7.19, 7.08, 7.07, 3.90, 3.87, 3.76, 3.73, 3.46, 2.77, 2.58, 1.31, 1.31, 1.30, 1.29, 1.28, 1.26, 1.26, 1.25, 1.24, 1.21, 1.20, 1.19, 1.19, 1.17, 1.17, 1.16, 1.15, 1.14, 1.13, 1.13, 1.12, 1.12, 0.90, 0.89, 0.87

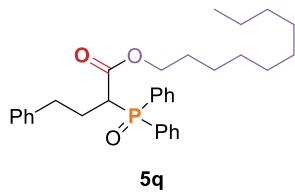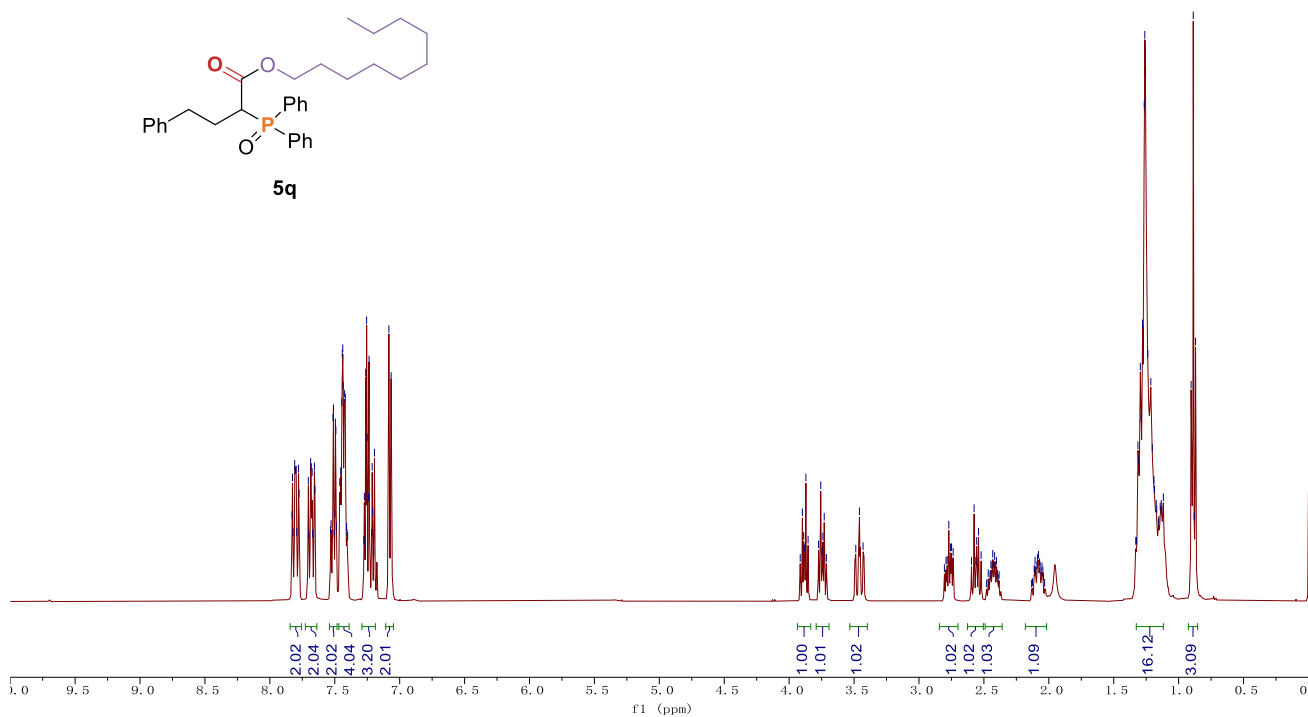

<sup>13</sup>C NMR CDCl<sub>3</sub> 100.62MHz

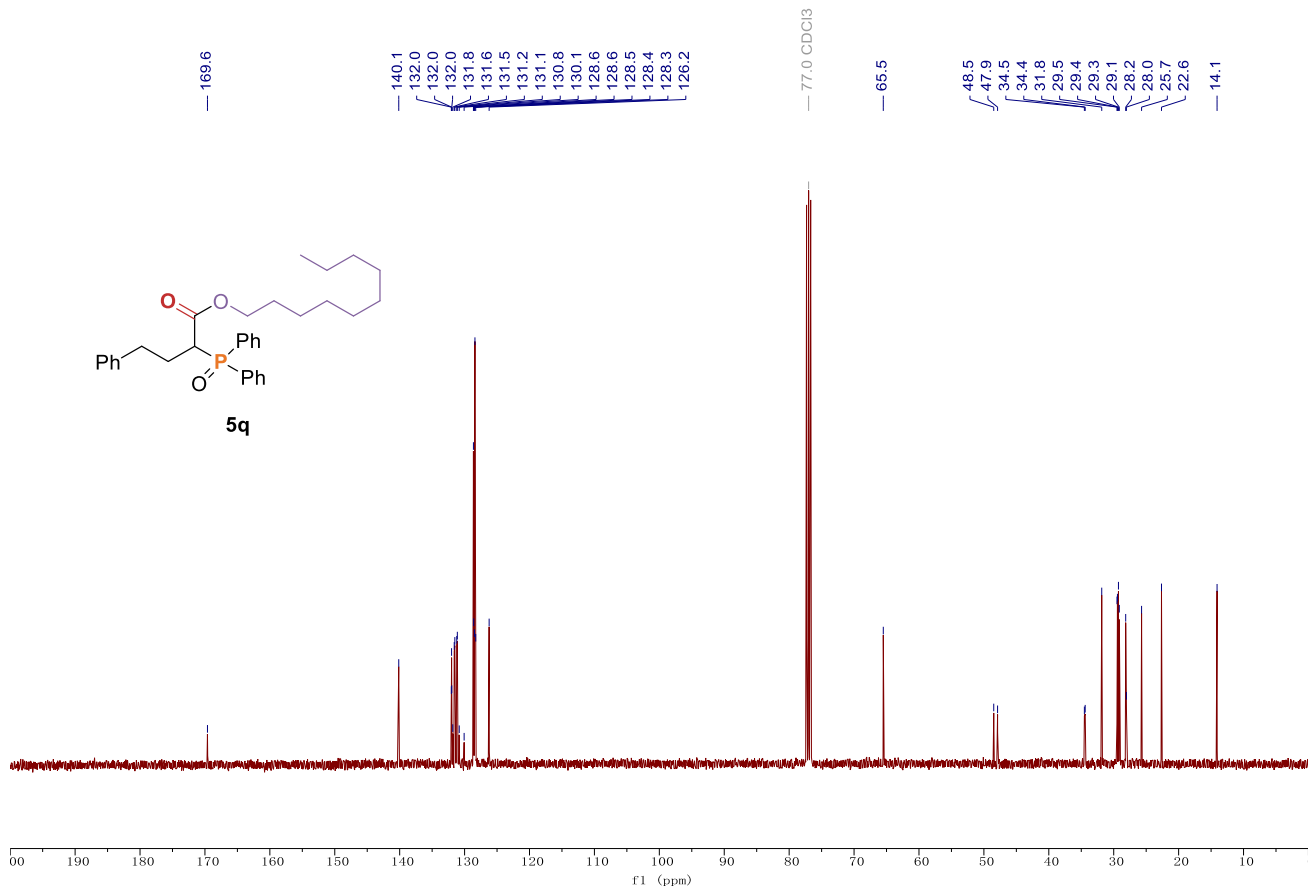

31P NMR CDCl3 161.97MHz

29.55

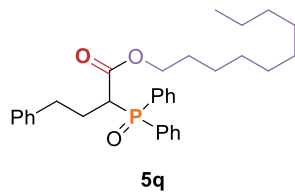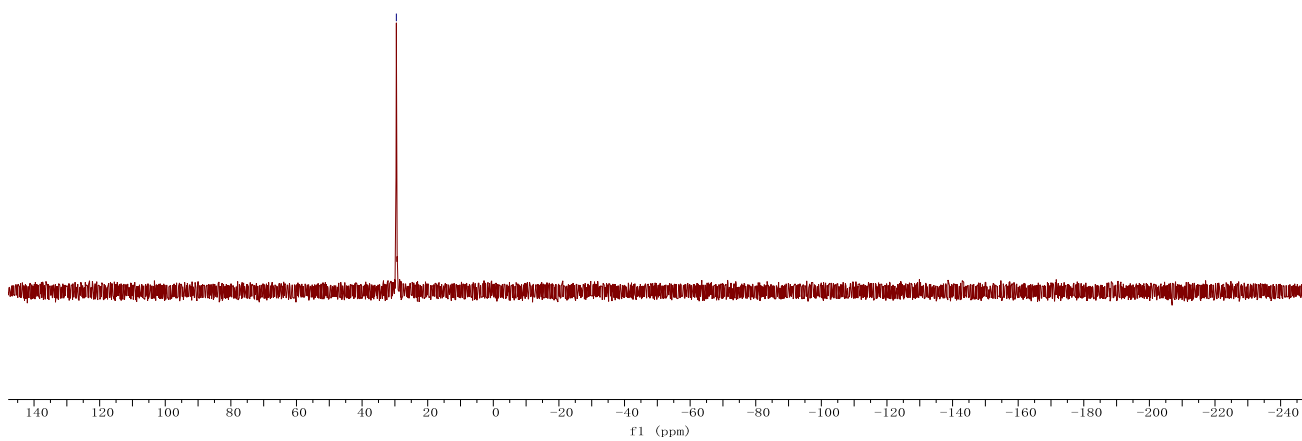



1H NMR CDCl3 400.13MHz

7.69  
7.67  
7.66  
7.64  
7.29  
7.27

3.95  
3.93  
3.92  
3.47  
3.43

2.40  
1.41  
1.39  
1.37  
1.30  
1.29  
1.28  
1.25  
1.21  
1.17  
1.15  
1.14  
1.12  
0.90  
0.88  
0.87

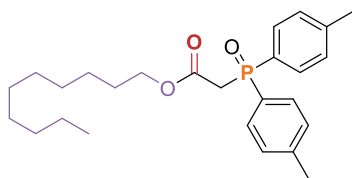

5r

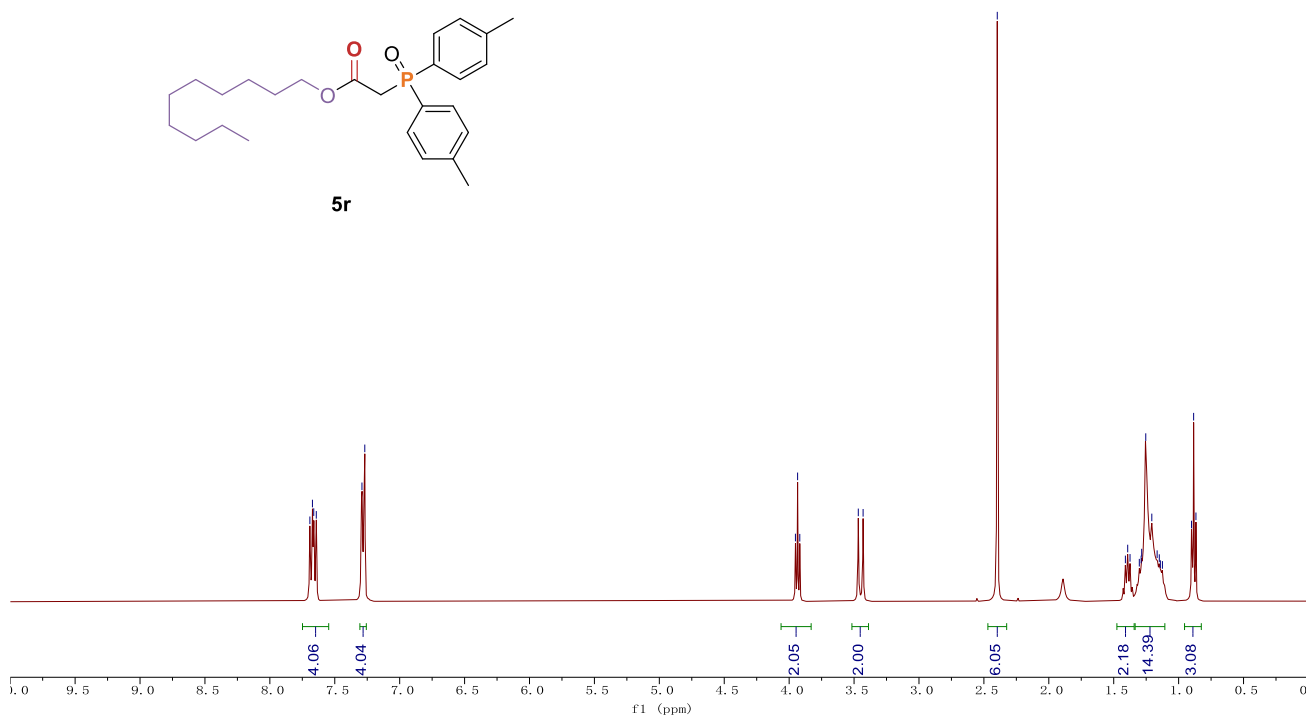

13C NMR CDCl3 176.08MHz

166.53

142.70  
142.68  
131.17  
131.12  
129.37  
129.30  
129.07  
128.47

65.73

39.49  
39.15  
31.90  
29.56  
29.48  
29.32  
29.31  
29.23  
29.21  
28.31  
25.72  
22.69  
21.61  
14.12

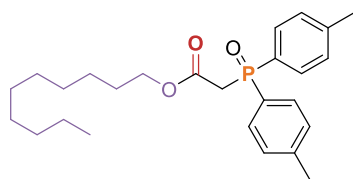

5r

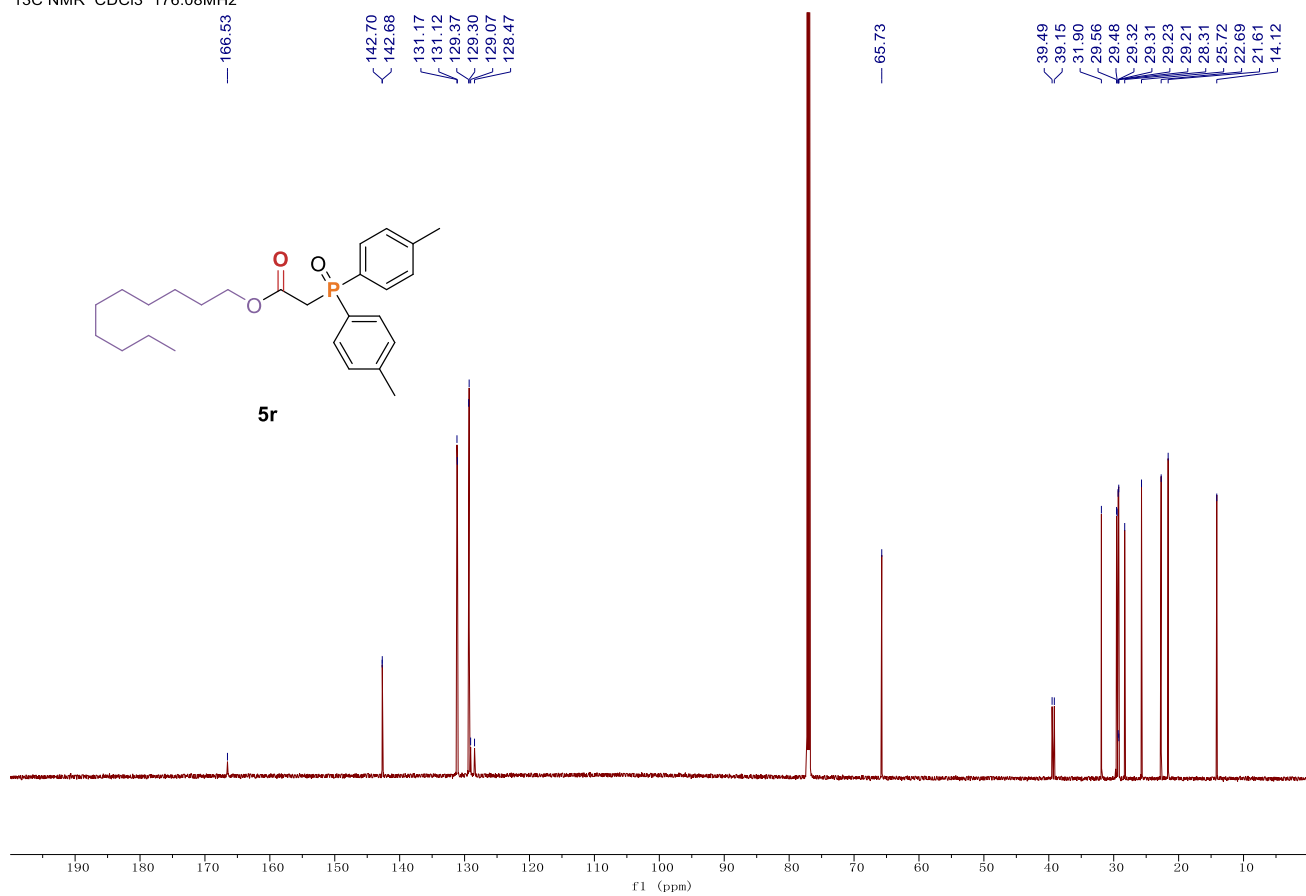

31P NMR CDCl3 161.97MHz

— 27.32

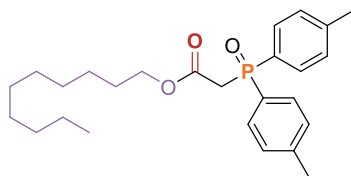

5r

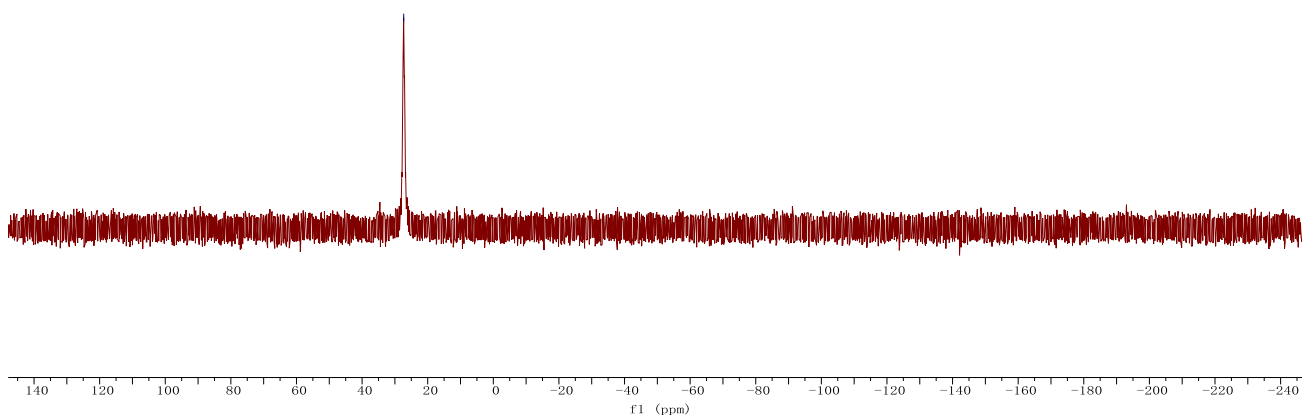

1H NMR CDCl3 400.13MHz

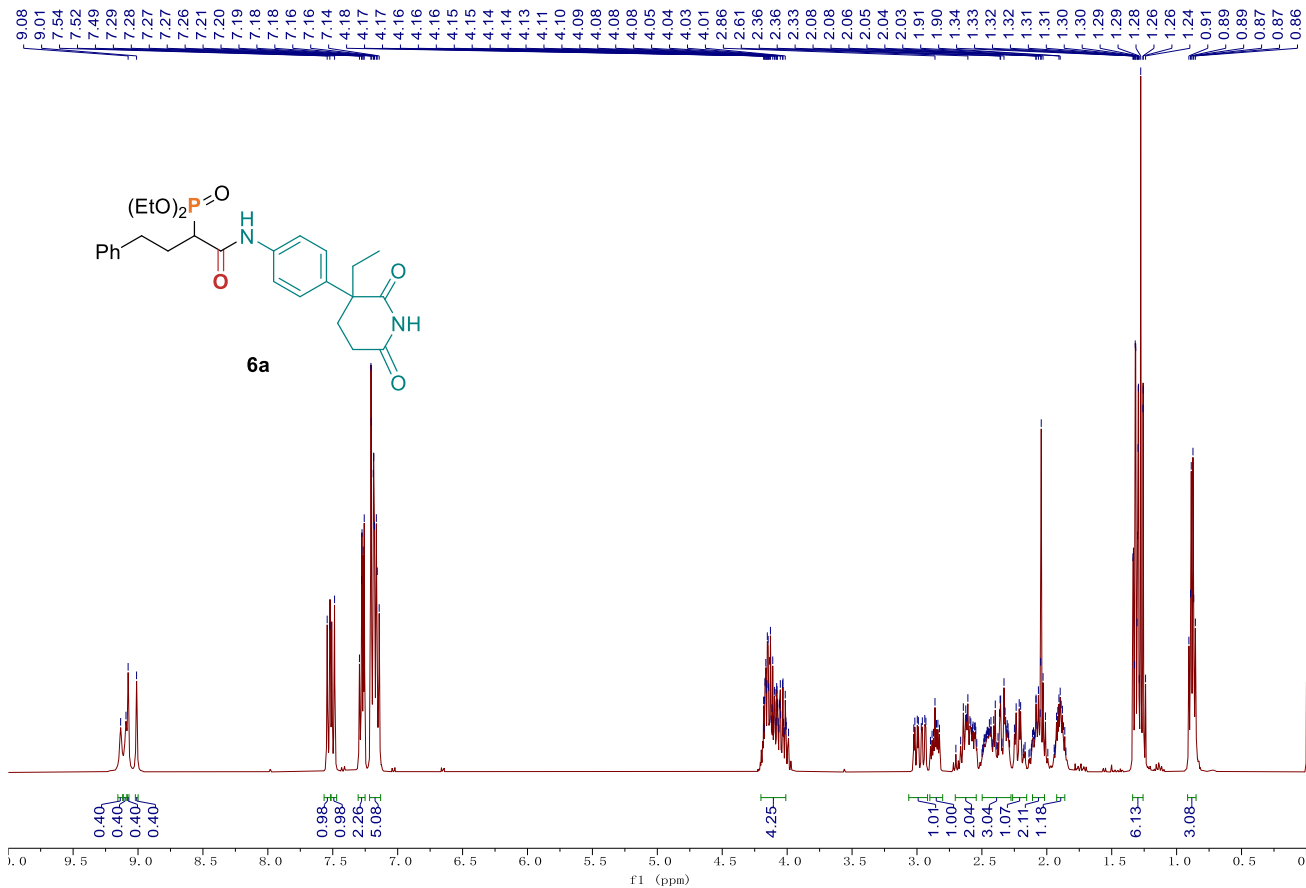

13C NMR CDCl3 100.62MHz

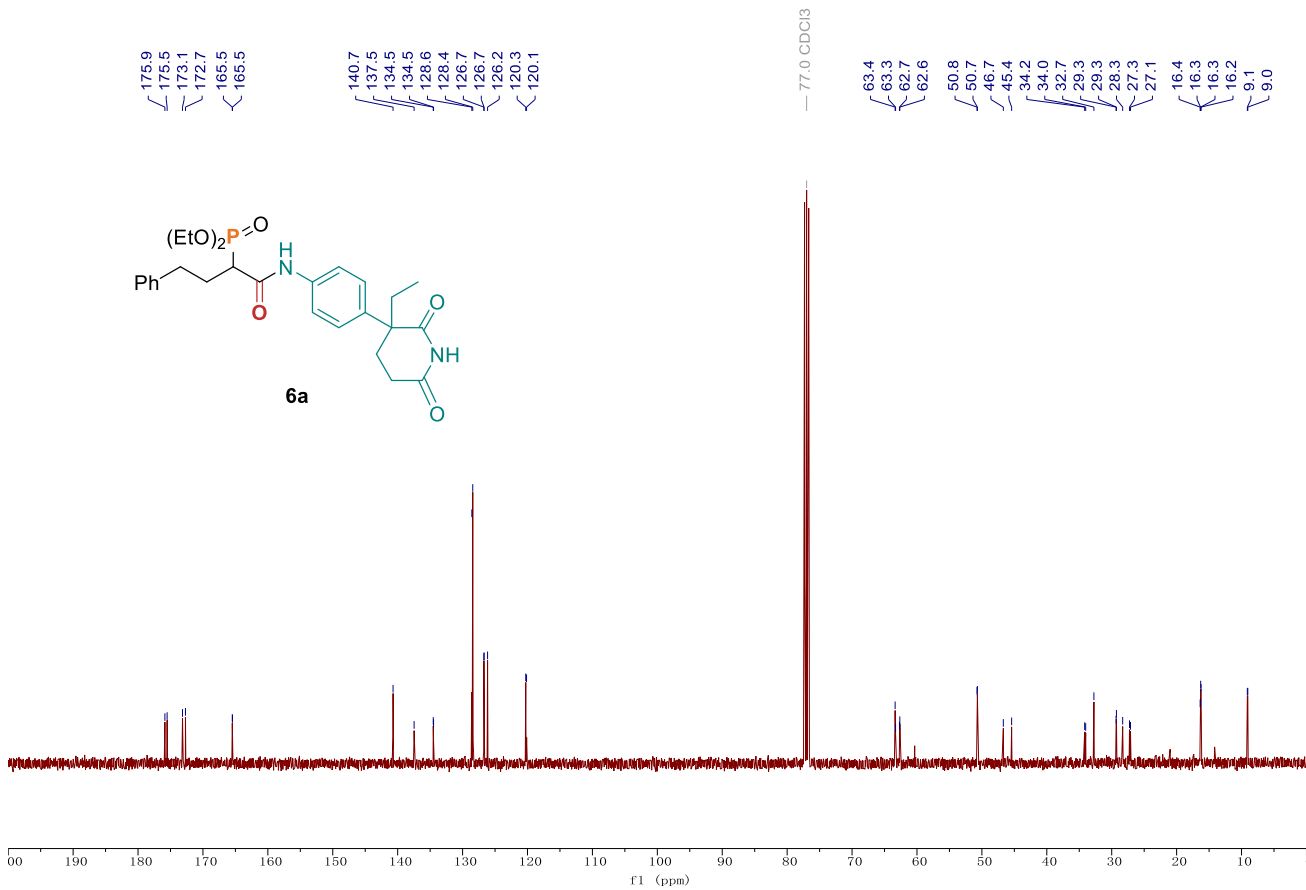

24.88

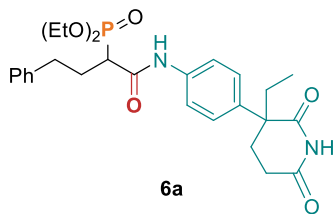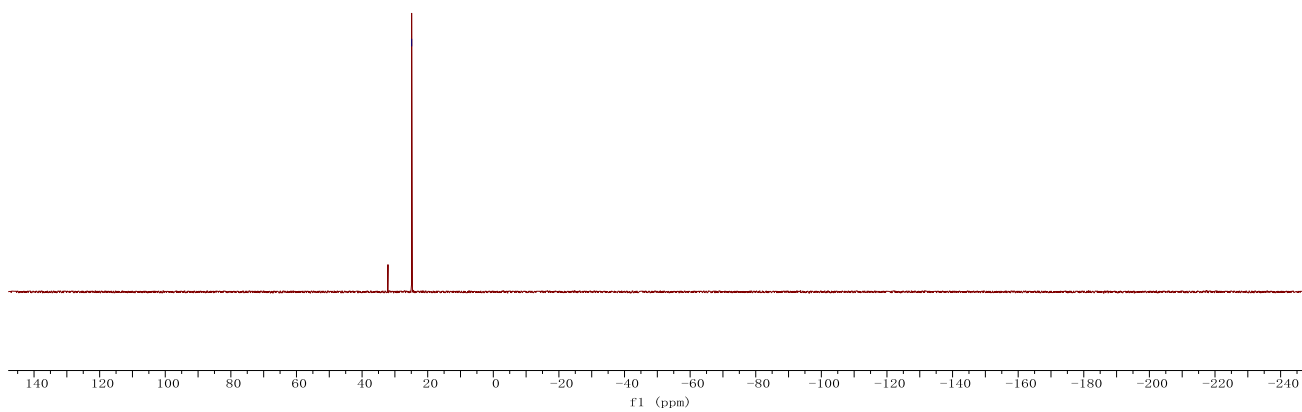

1H NMR CDCl3 400.13MHz

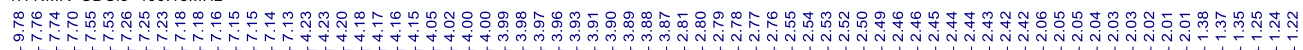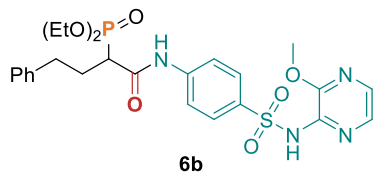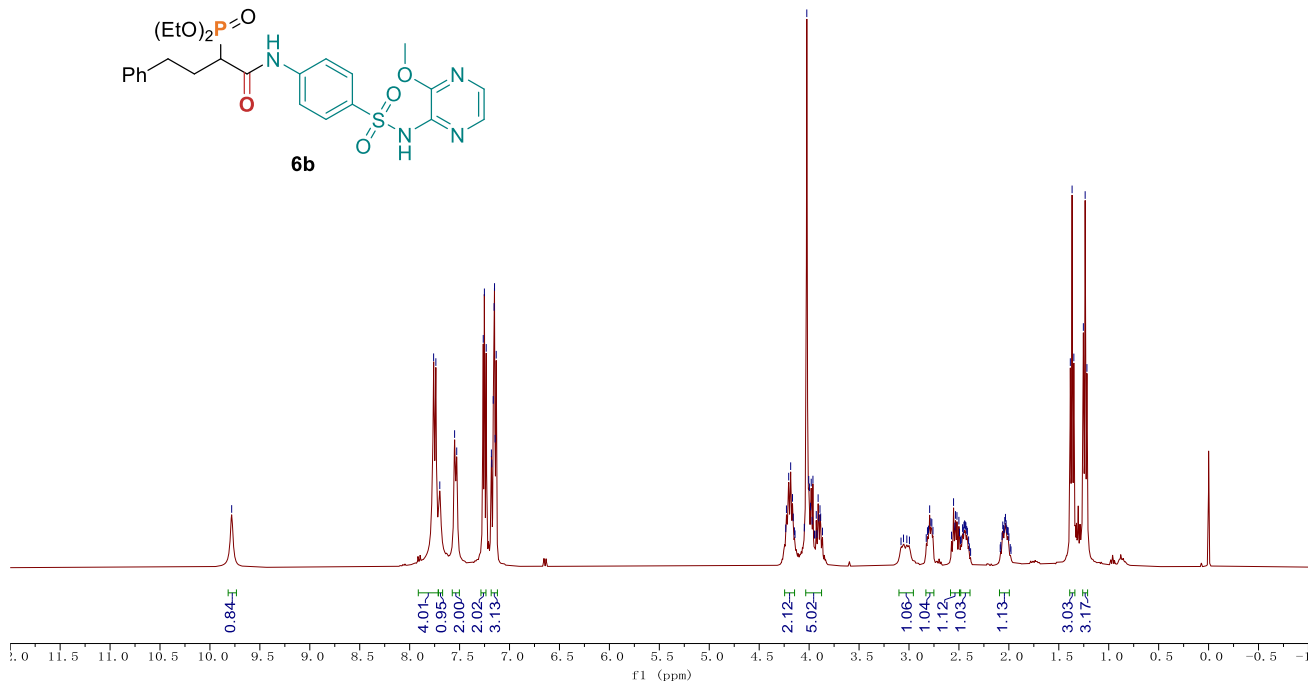

13C NMR CDCl3 100.62MHz

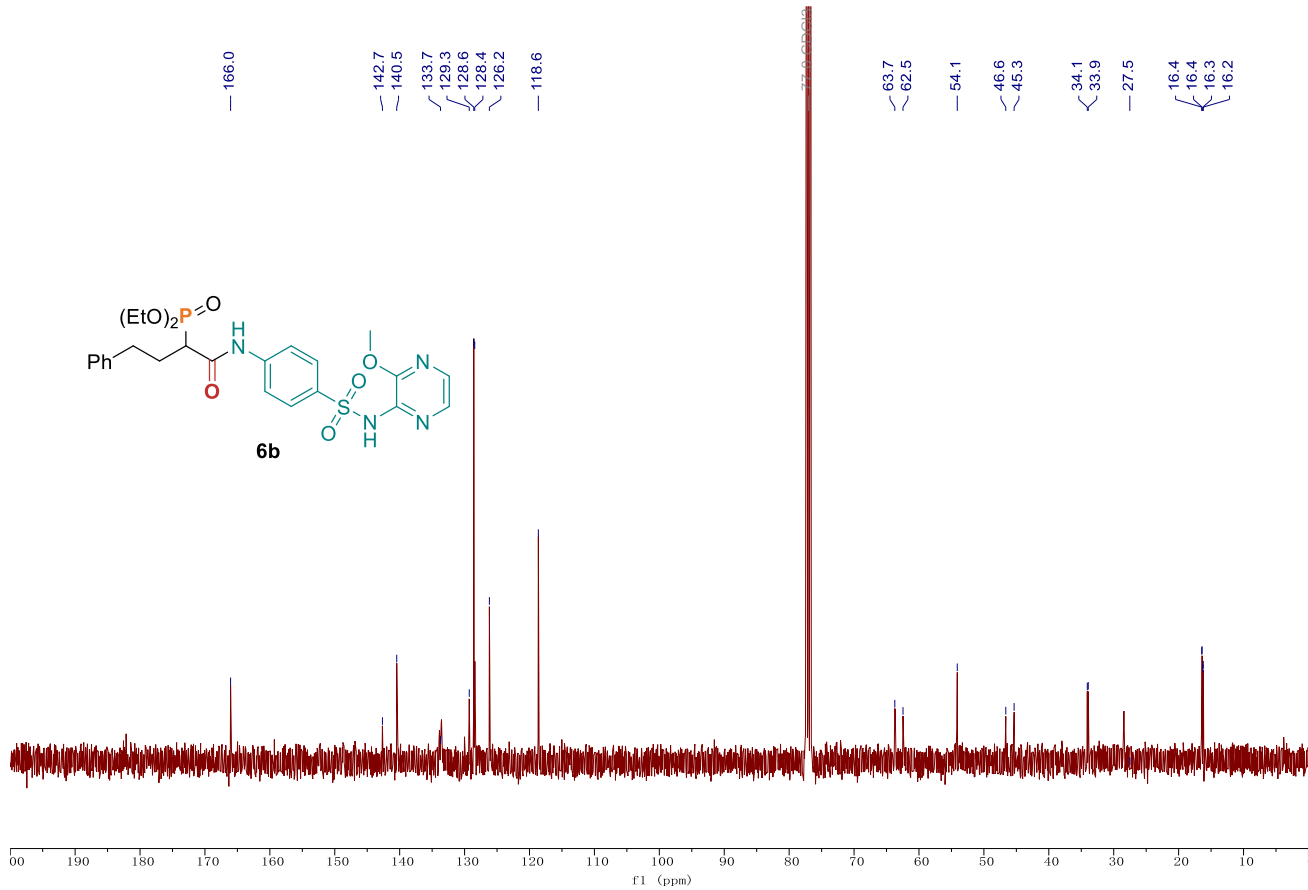

— 24.70

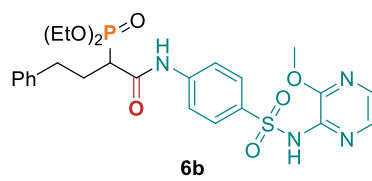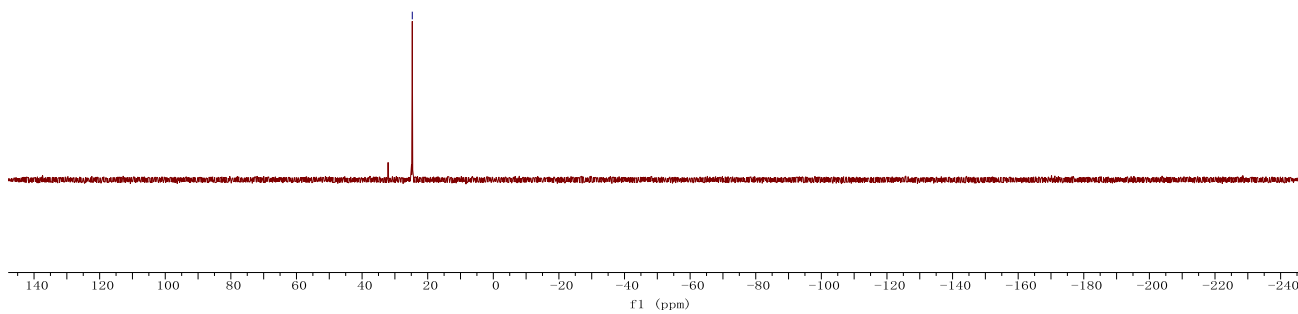

1H NMR CDCl3 400.13MHz

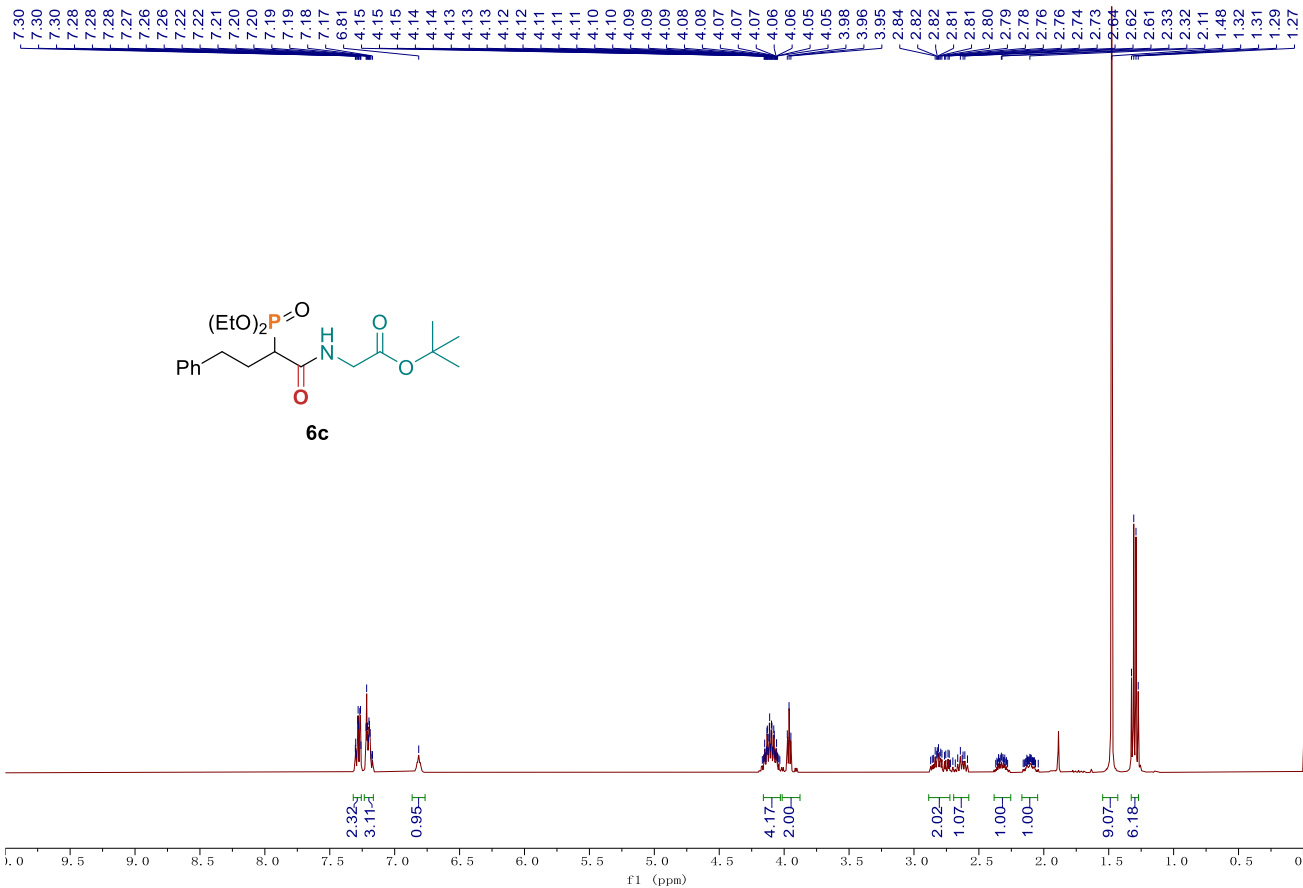

13C NMR CDCl3 100.62MHz

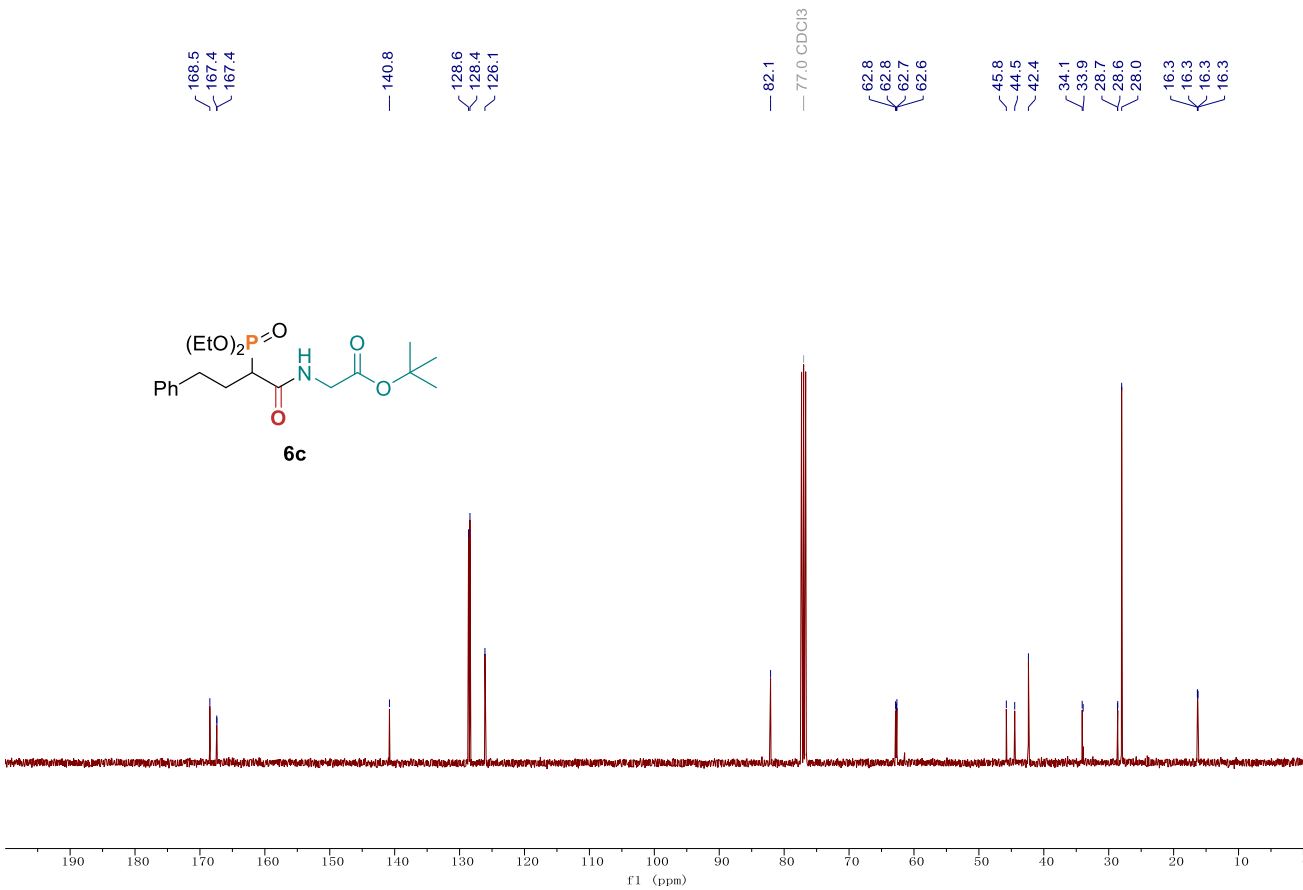

24.88

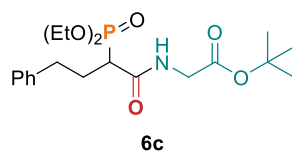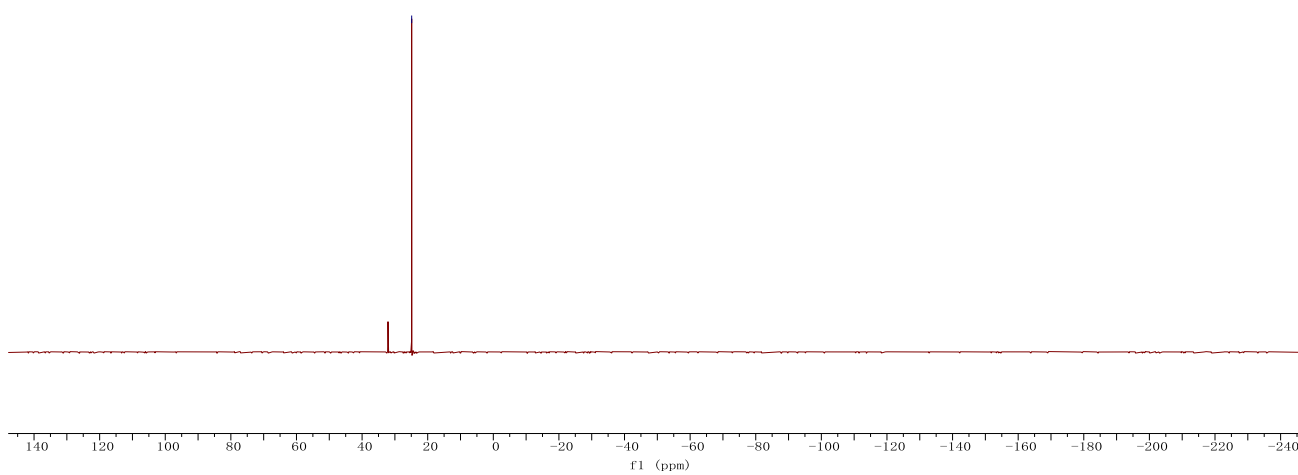



1H NMR CDCl3 400.13MHz

7.31, 7.31, 7.30, 7.29, 7.29, 7.28, 7.28, 7.27, 7.27, 7.27, 7.27, 7.26, 7.26, 7.25, 7.25, 7.24, 7.24, 7.23, 7.23, 7.21, 7.21, 7.21, 7.20, 7.19, 7.18, 6.74, 4.57, 4.57, 4.55, 4.55, 4.54, 4.54, 4.28, 4.28, 4.27, 4.27, 4.26, 4.26, 4.17, 4.17, 4.17, 4.17, 4.16, 4.16, 4.15, 4.15, 4.15, 4.14, 4.14, 4.14, 4.13, 4.13, 4.12, 4.12, 4.12, 4.11, 4.11, 4.11, 4.10, 4.10, 4.09, 4.09, 4.08, 4.08, 3.73, 3.73, 2.85, 2.84, 2.83, 2.83, 2.81, 2.81, 2.81, 2.76, 2.76, 2.65, 2.65, 2.62, 2.62, 1.34, 1.34, 1.32, 1.32, 1.30, 1.30, 1.28, 1.28, 1.24, 1.24, 1.23, 1.23, 1.13, 1.13

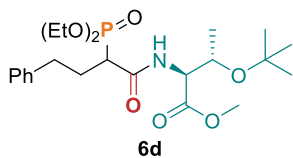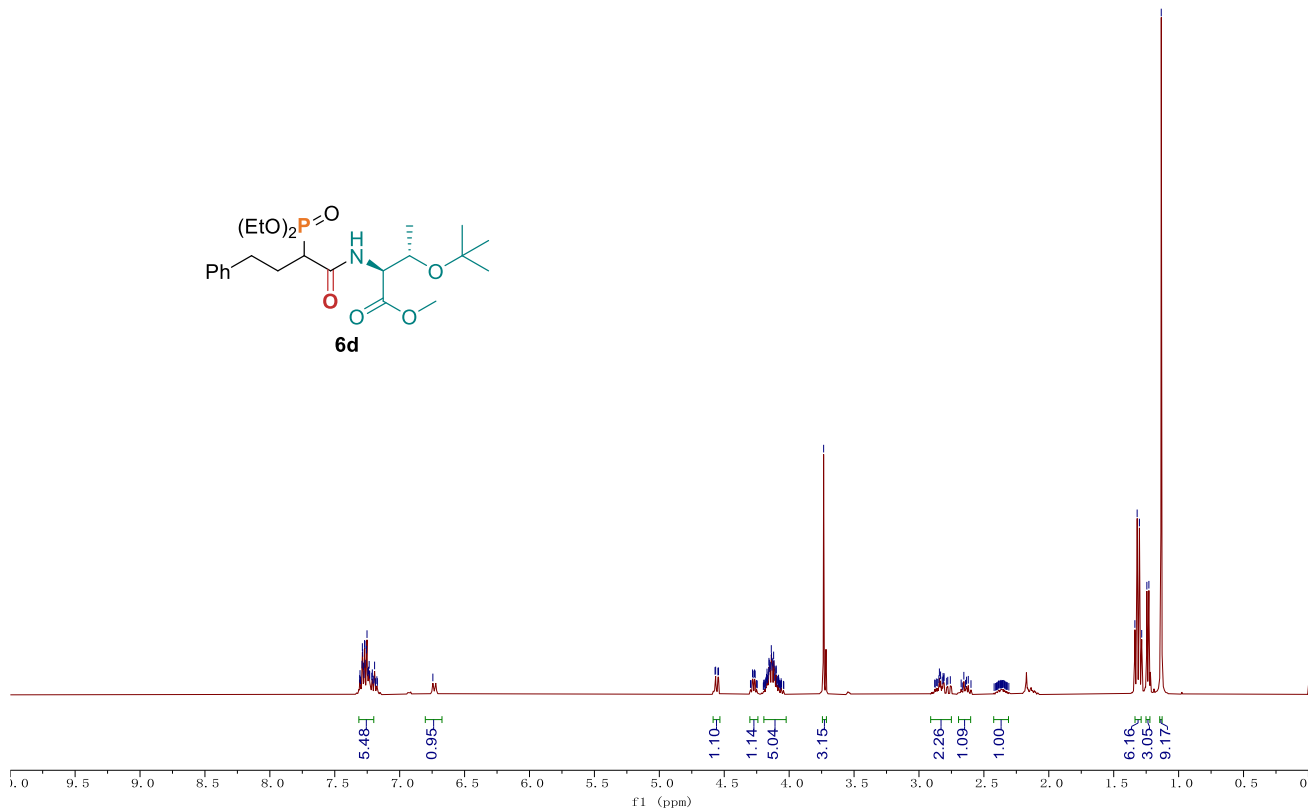

13C NMR CDCl3 100.62MHz

171.0, 167.8, 167.7, 140.9, 128.6, 128.4, 126.0, 77.0 CDCl3, 74.0, 67.3, 62.6, 62.5, 62.5, 58.2, 52.1, 46.1, 44.8, 33.9, 33.7, 28.6, 28.3, 28.3, 20.8, 16.4, 16.3

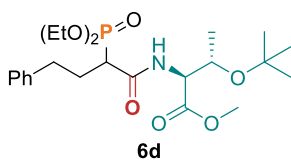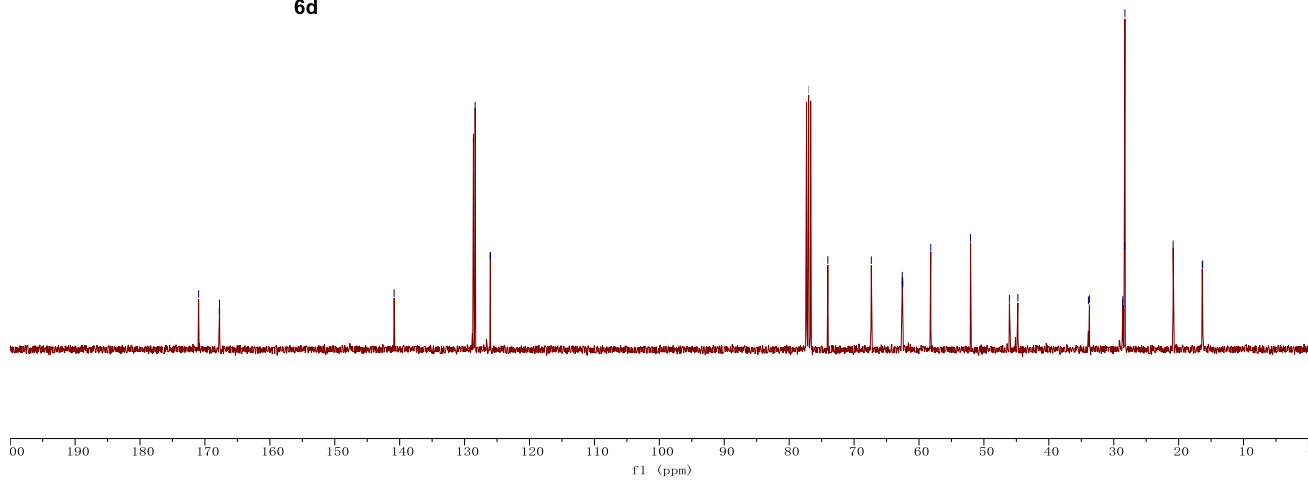

— 24.30

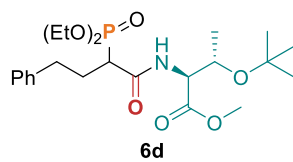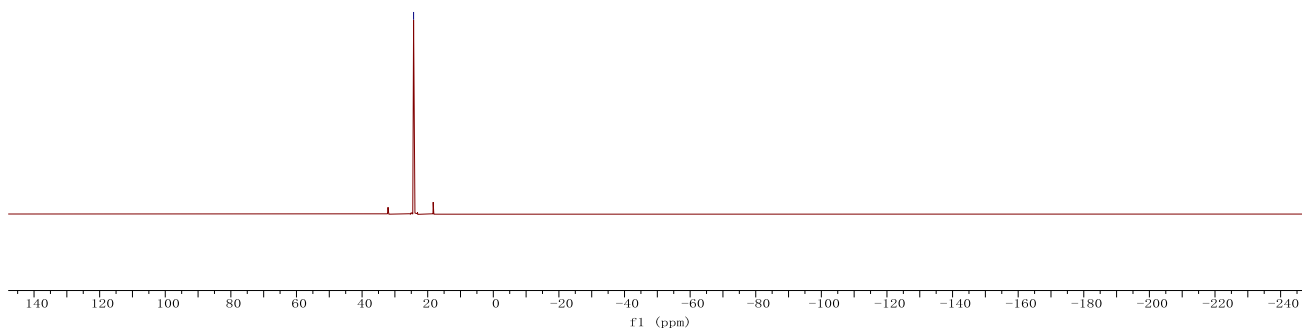

1H NMR CDCl3 400.13MHz

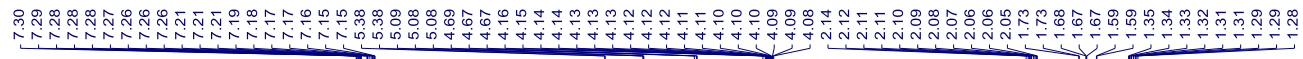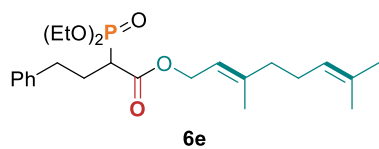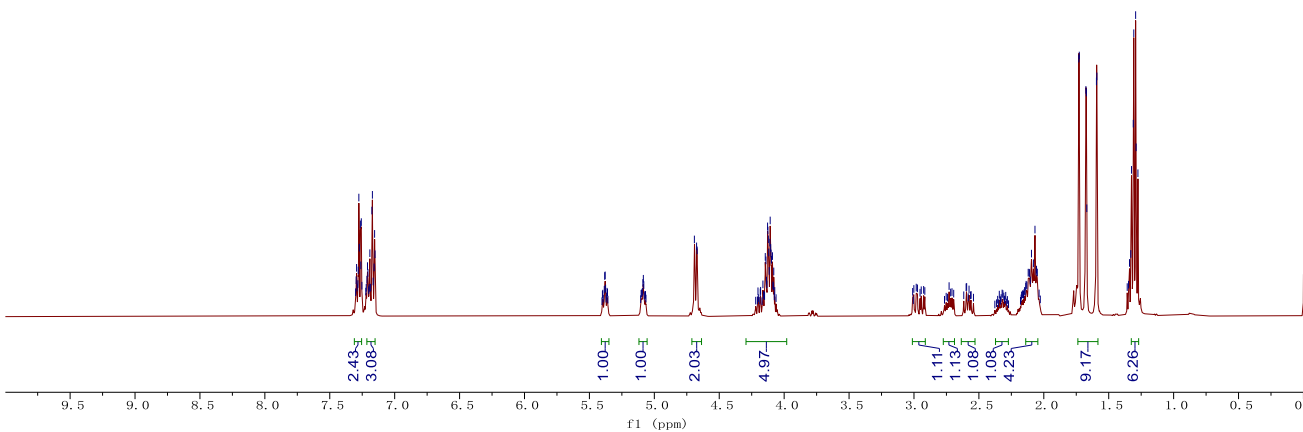

13C NMR CDCl3 100.62MHz

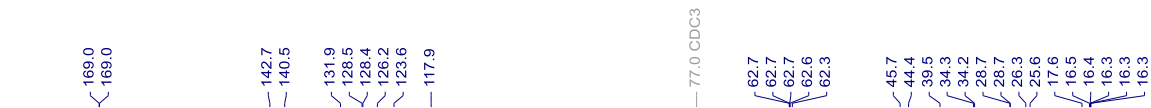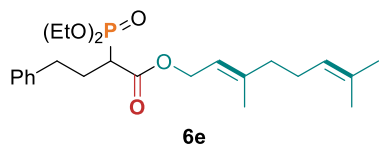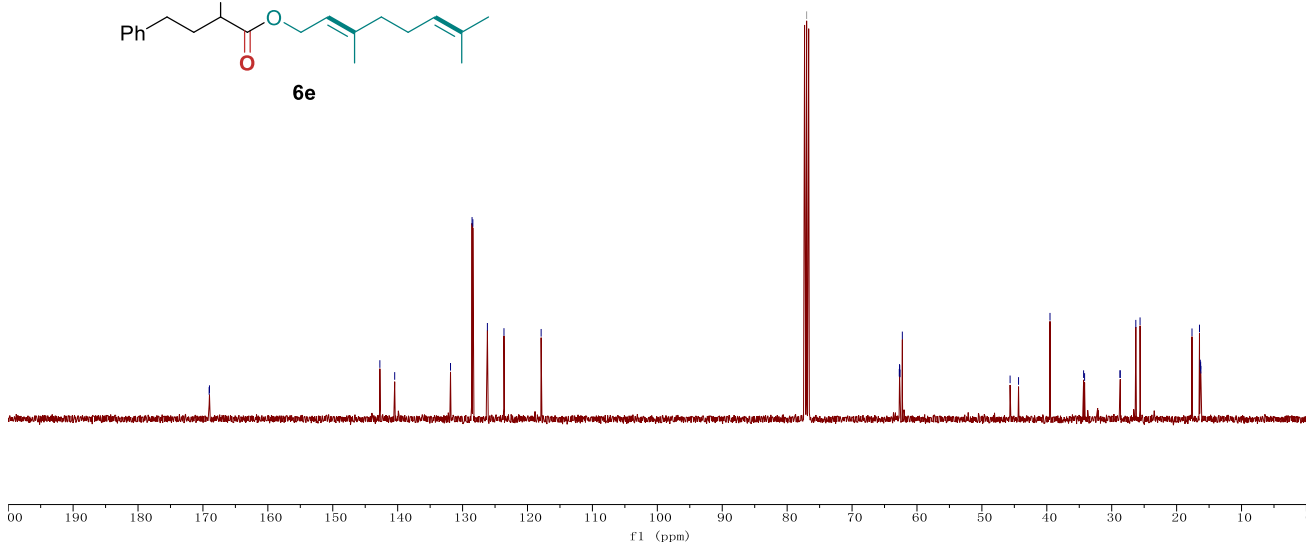

31P NMR CDCl3 161.97MHz

— 22.54

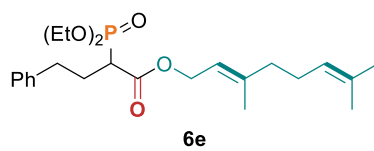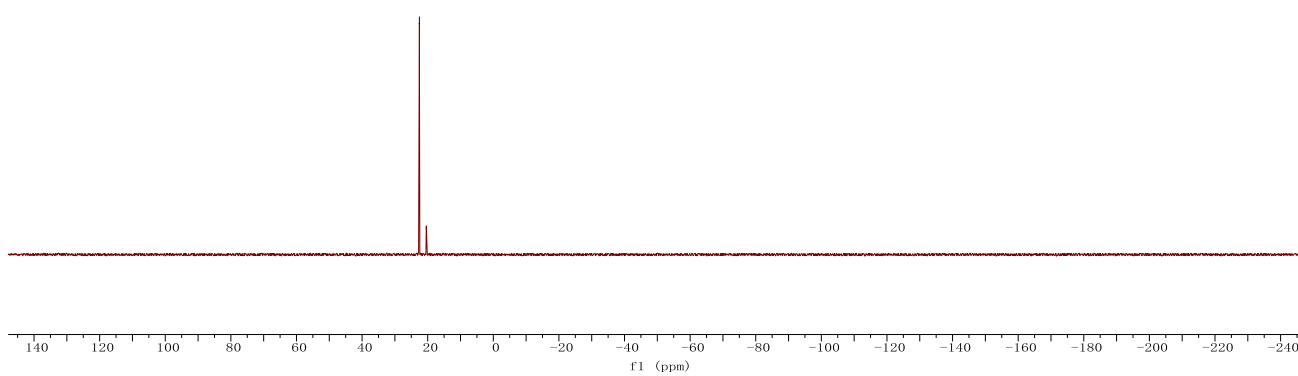

1H NMR CDCl3 400.13MHz

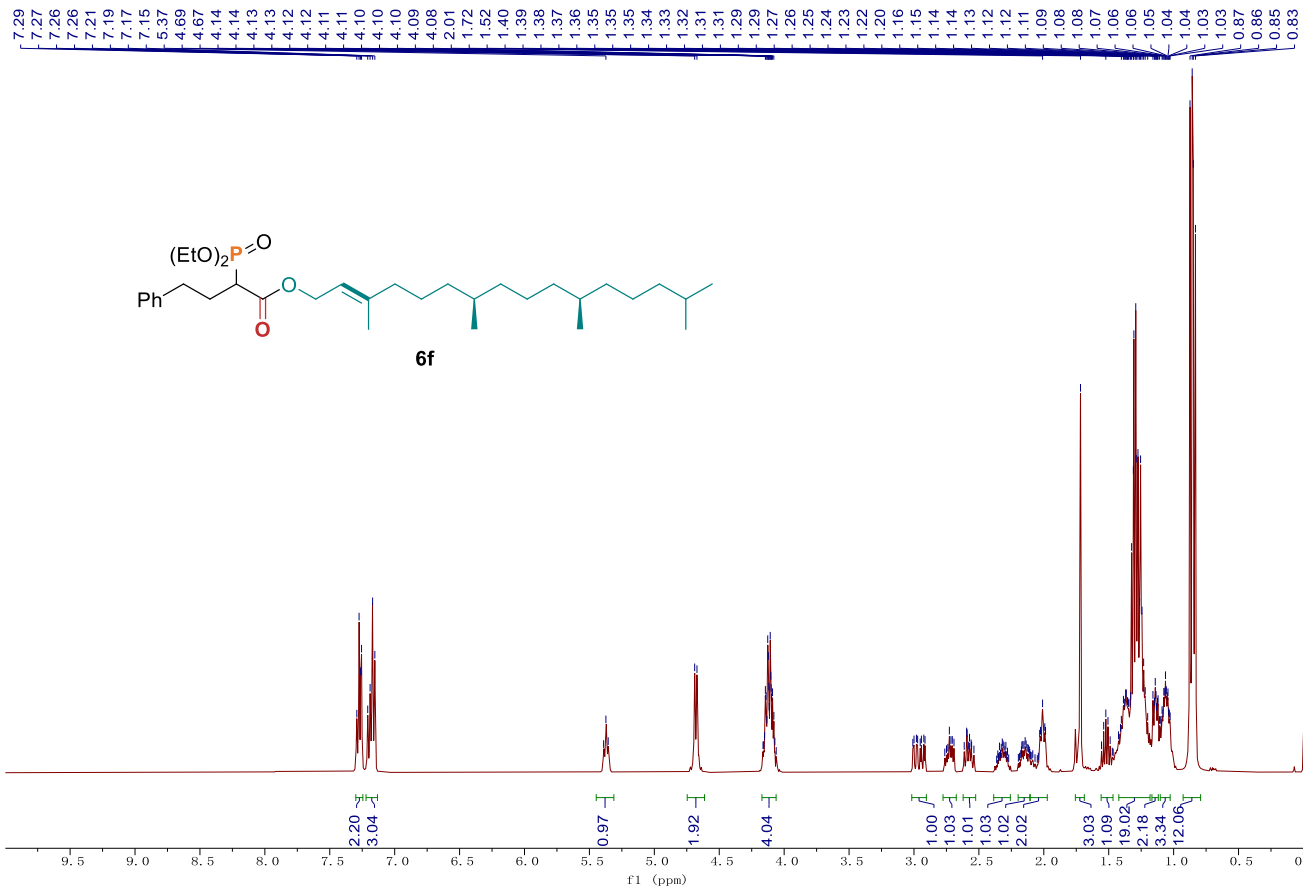

13C NMR CDCl3 100.62MHz

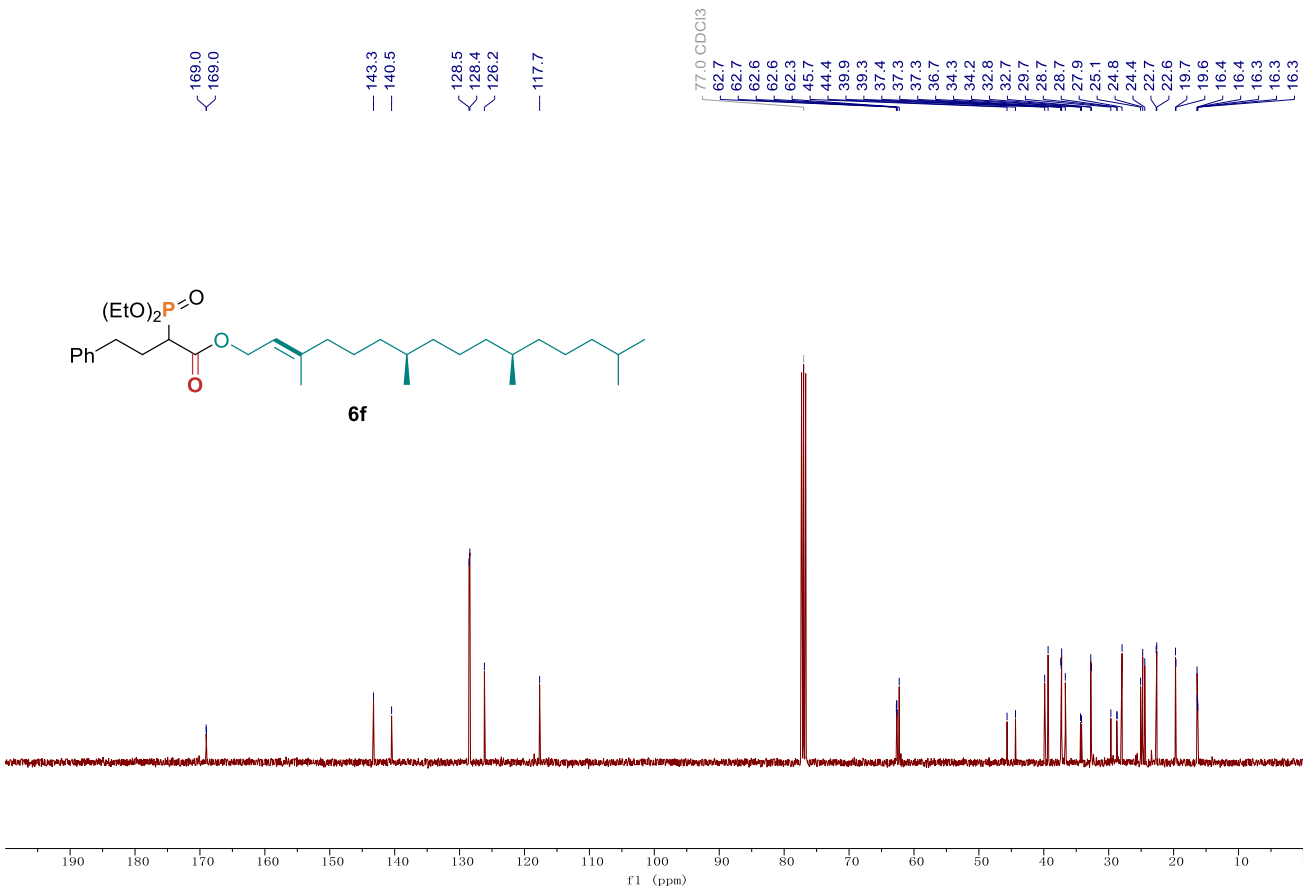

-- 22.54

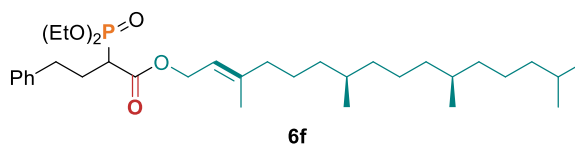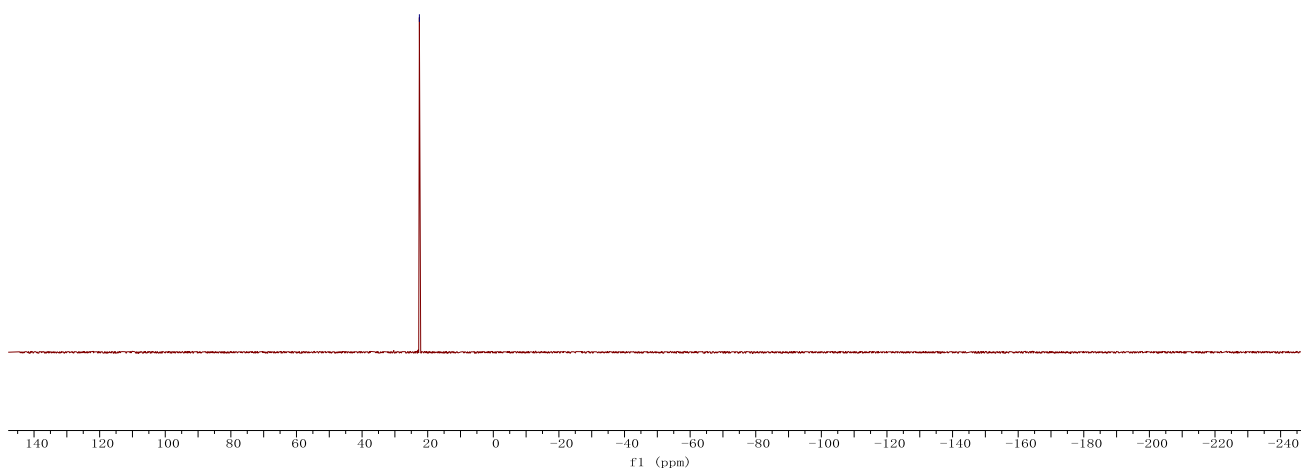

1H NMR CDCl3 400.13MHz

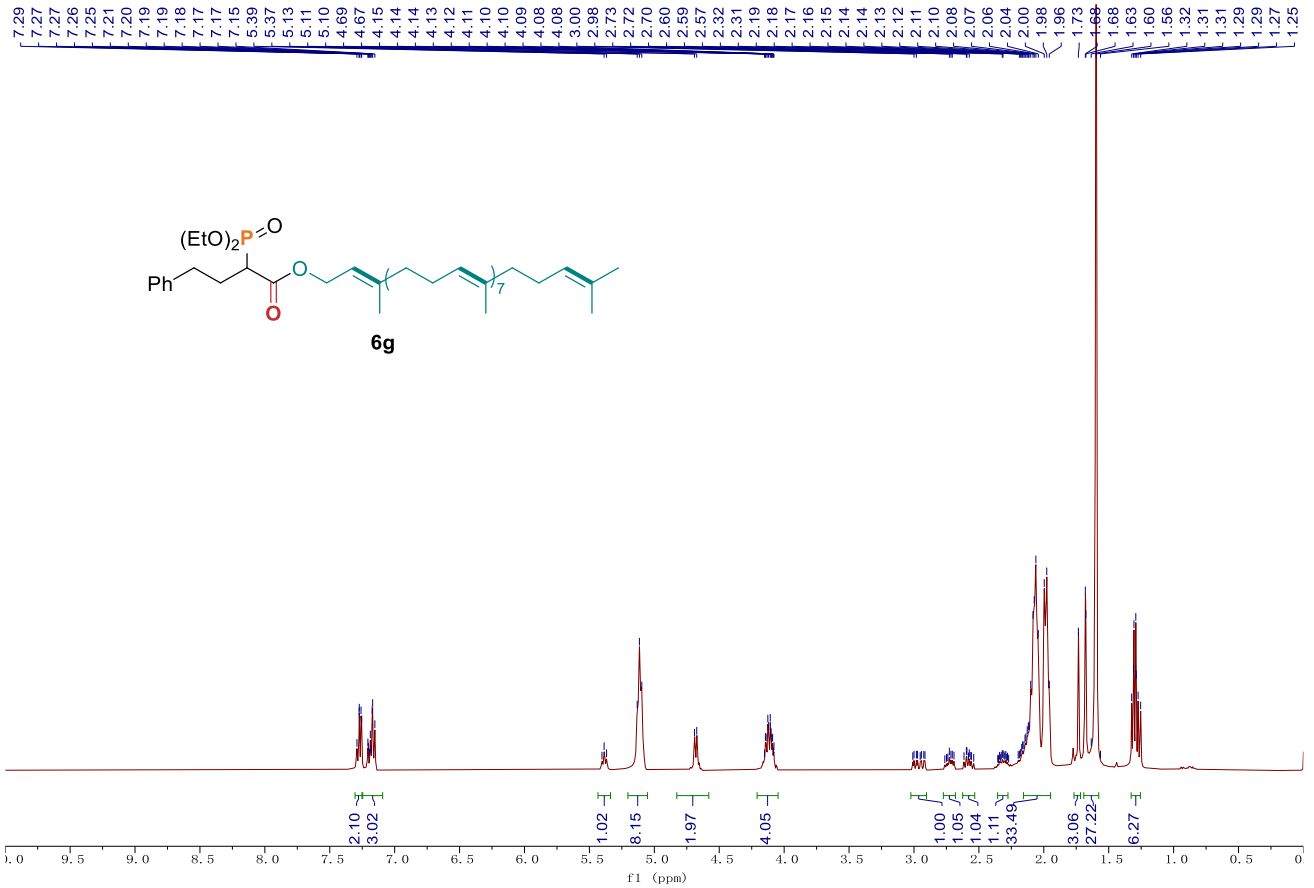

13C NMR CDCl3 100.62MHz

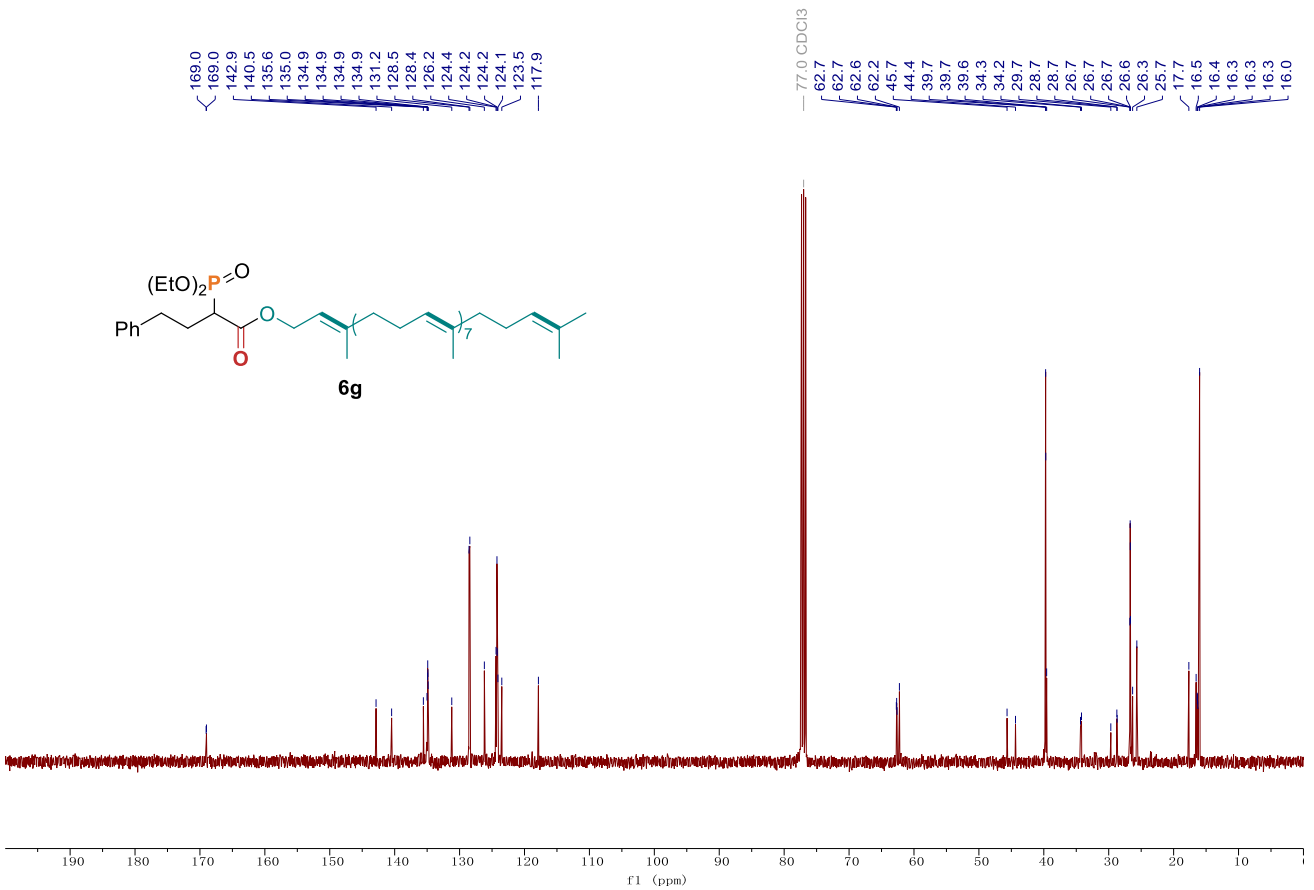

31P NMR CDCl3 161.97MHz

— 22.53

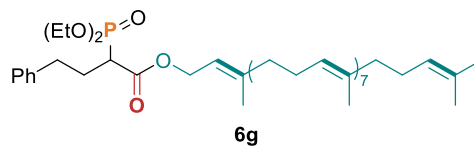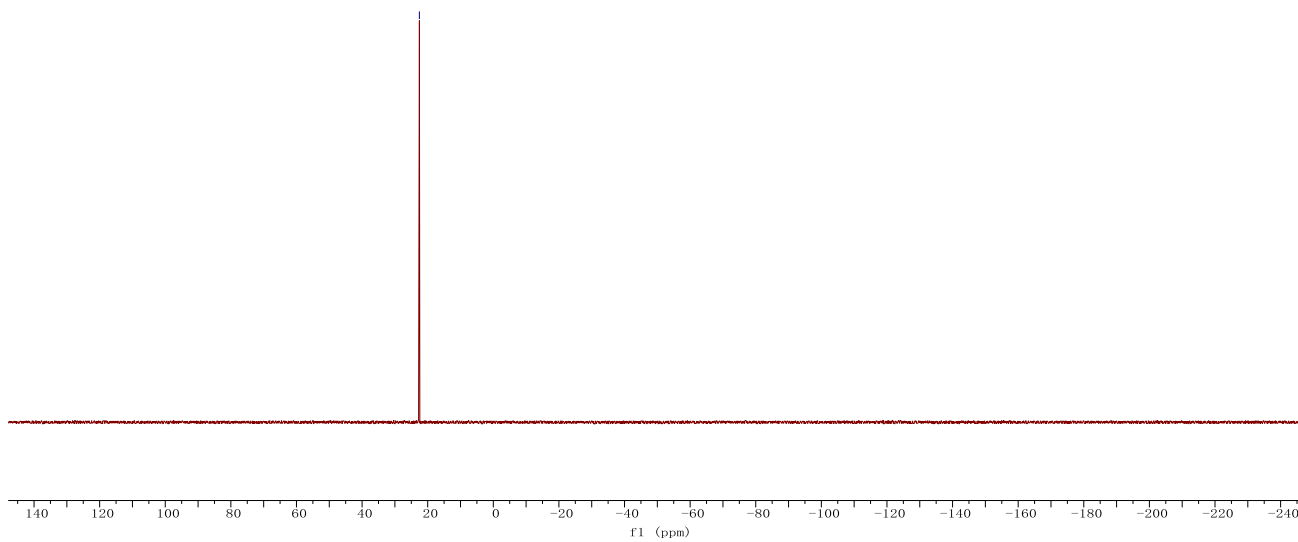



1H NMR CDCl3 400.13MHz

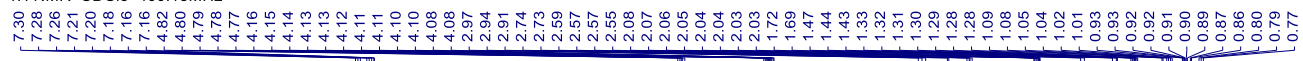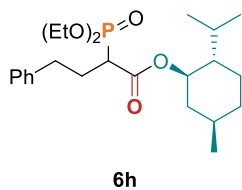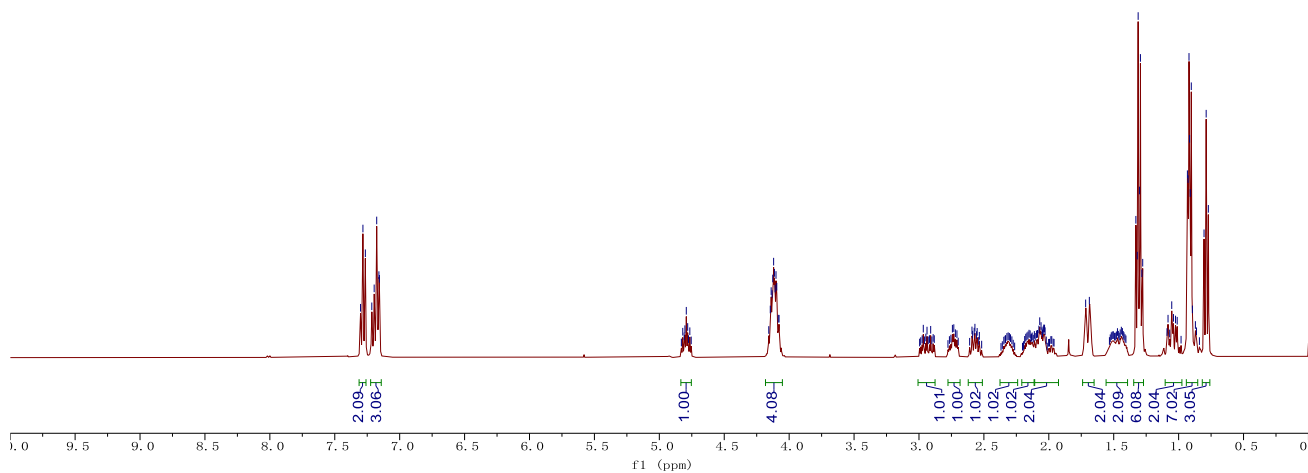

13C NMR CDCl3 100.62MHz

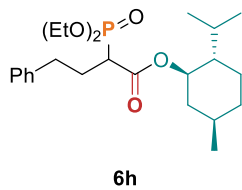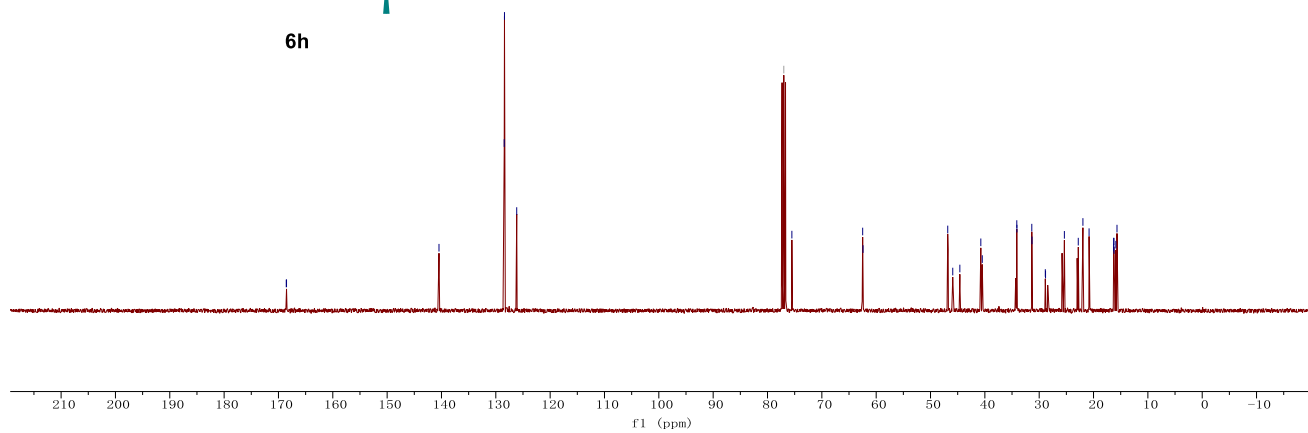

— 22.91

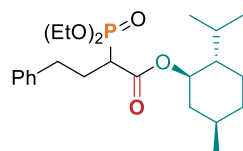

6h

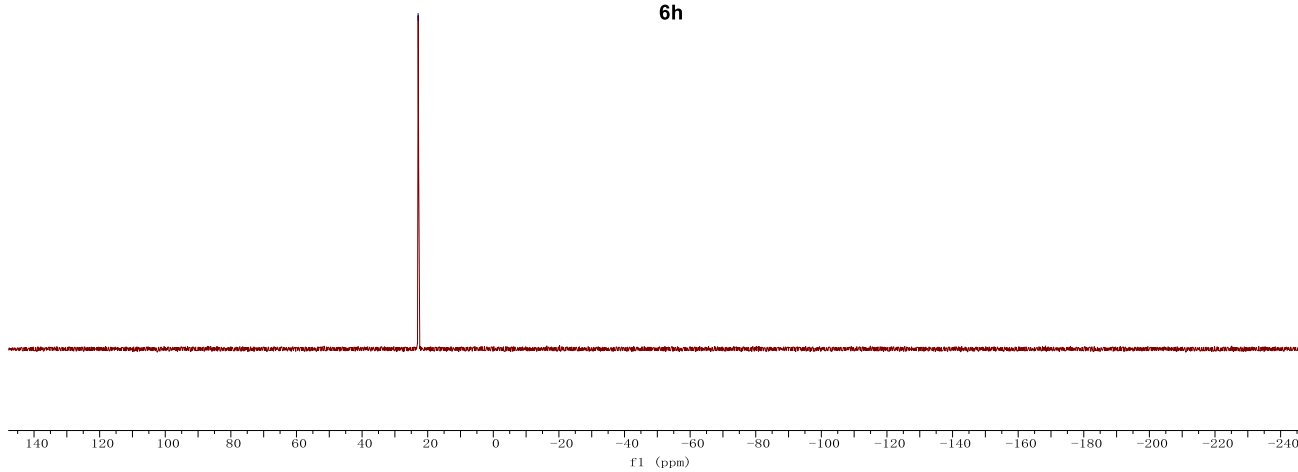

1H NMR CDCl3 700.17MHz

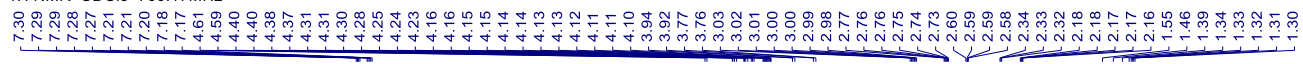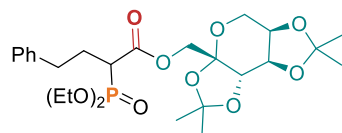

6i

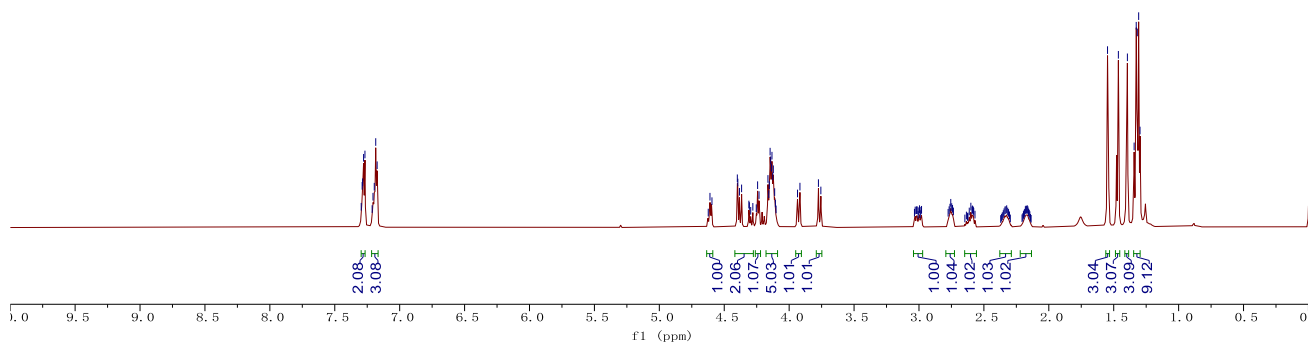

13C NMR CDCl3 176.08MHz

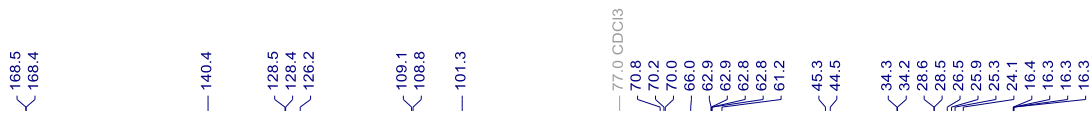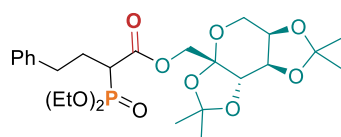

6i

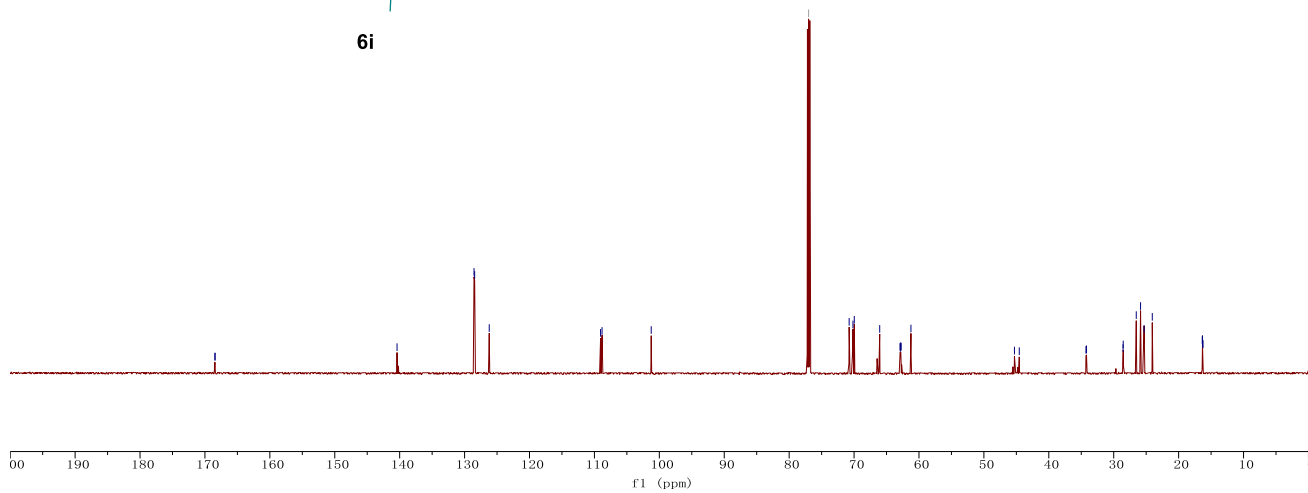

— 22.17

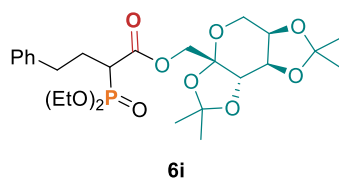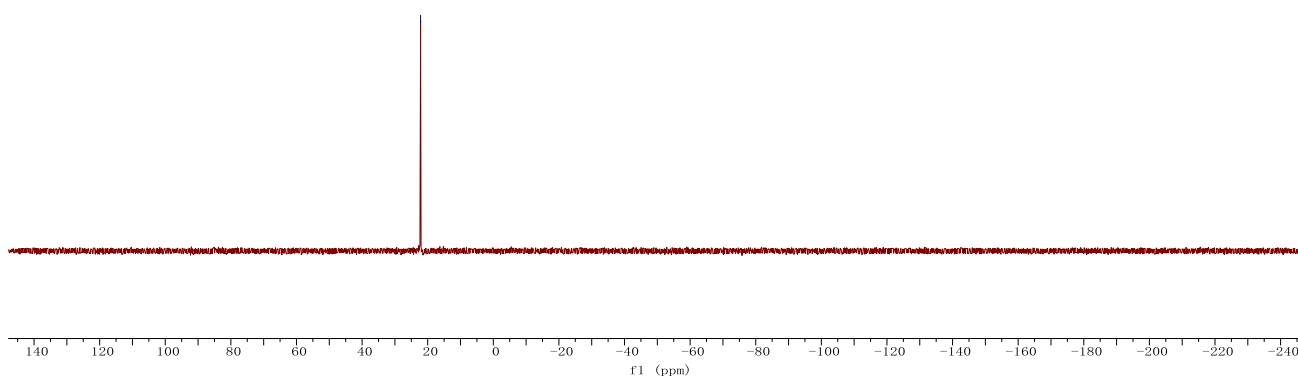

<sup>1</sup>H NMR CDCl<sub>3</sub> 400.13MHz

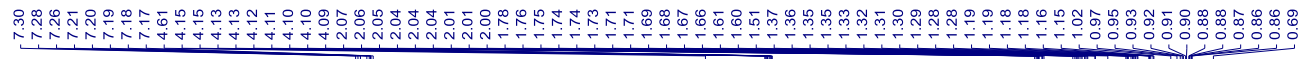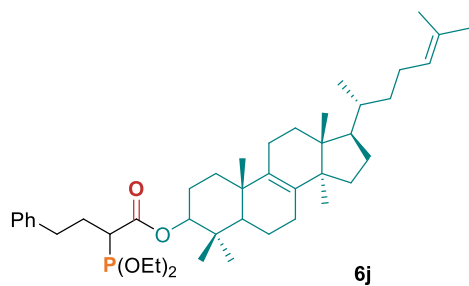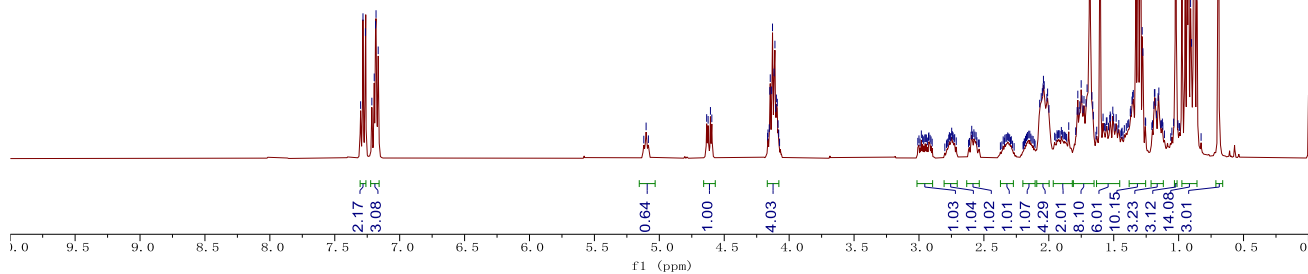

<sup>13</sup>C NMR CDCl<sub>3</sub> 100.62MHz

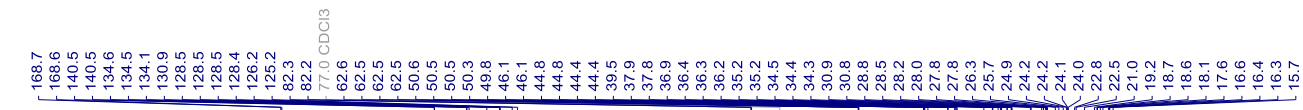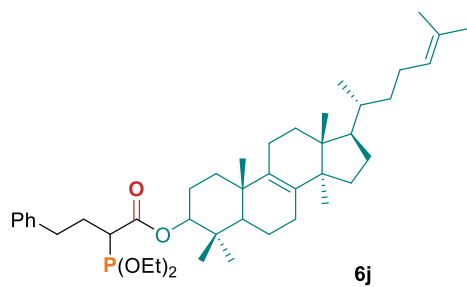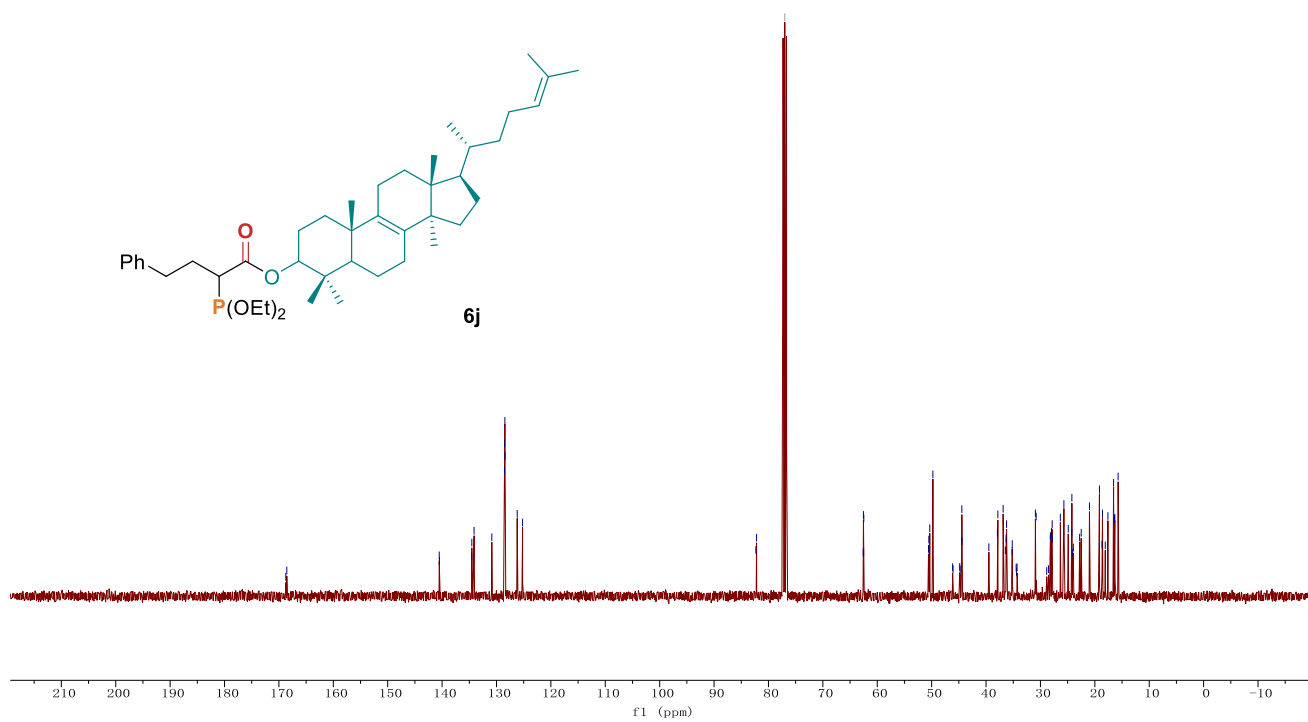

31P NMR CDCl3 161.97MHz

23.07  
22.97

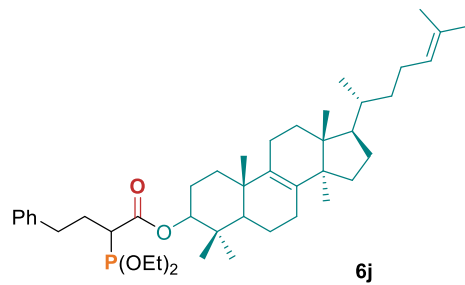

<sup>1</sup>H NMR CDCl<sub>3</sub> 400.13MHz

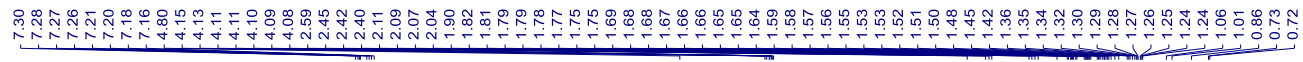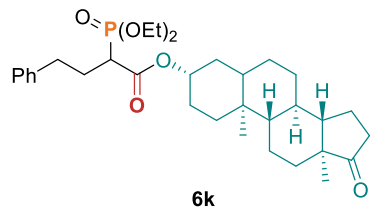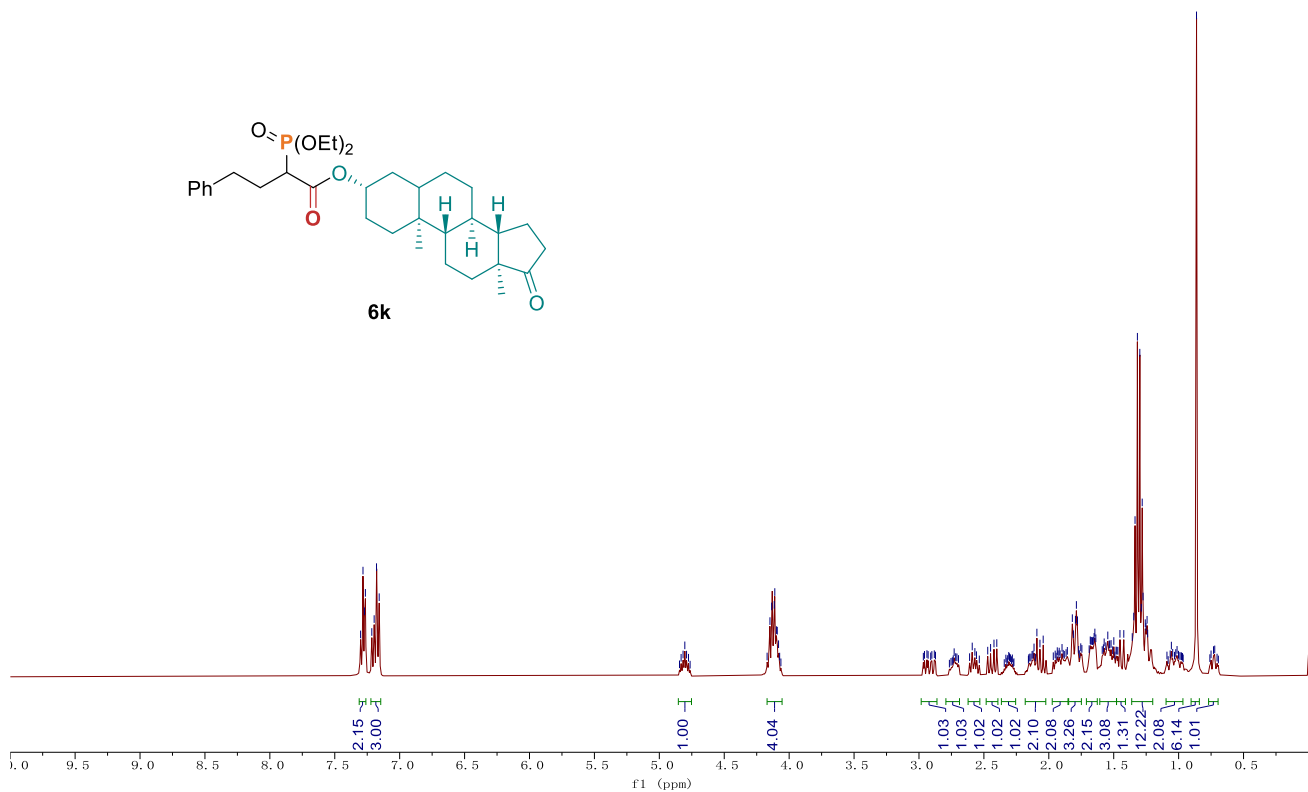

<sup>13</sup>C NMR CDCl<sub>3</sub> 100.63MHz

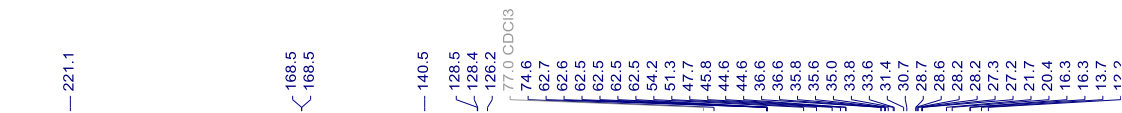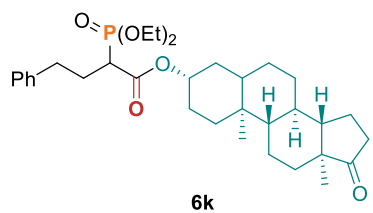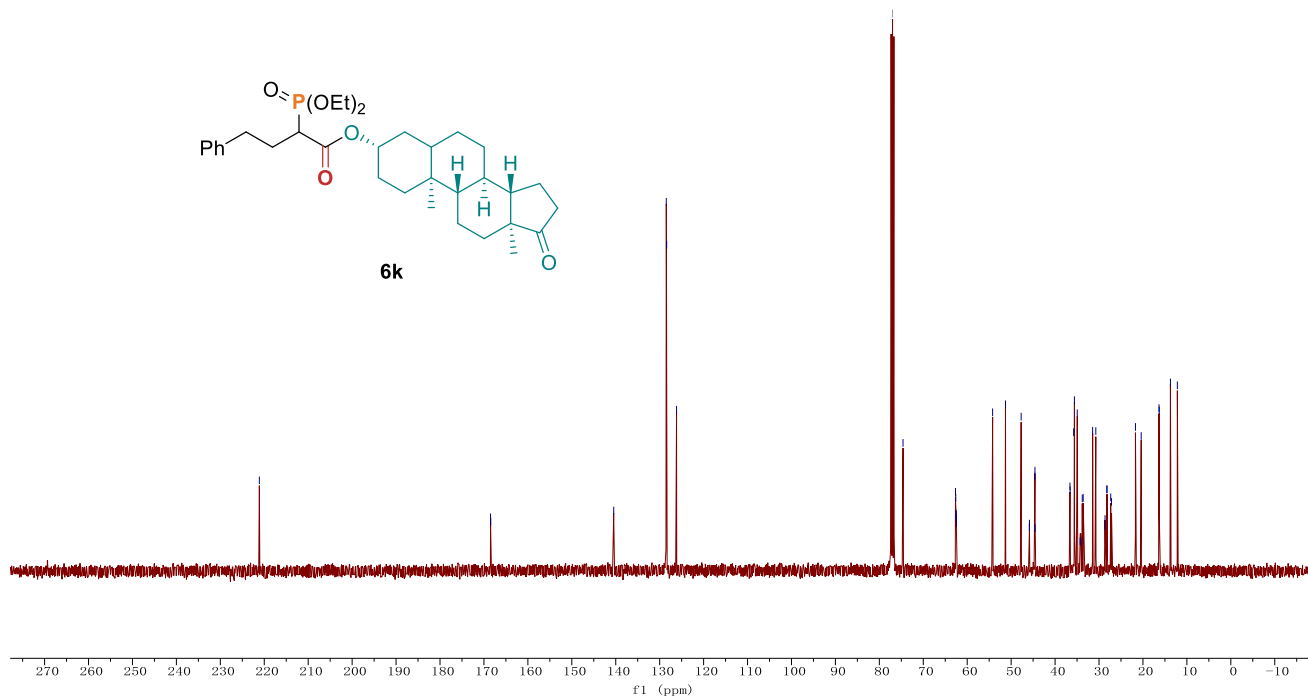

31P NMR CDCl3 161.97MHz

— 22.79

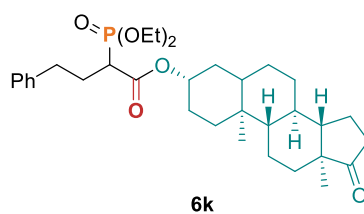



1H NMR CDCl3 400.13MHz

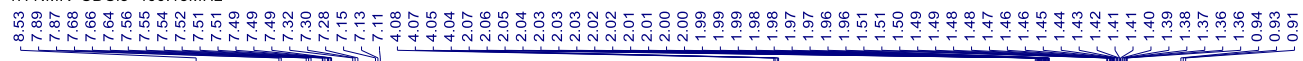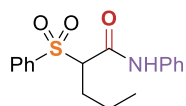

7a

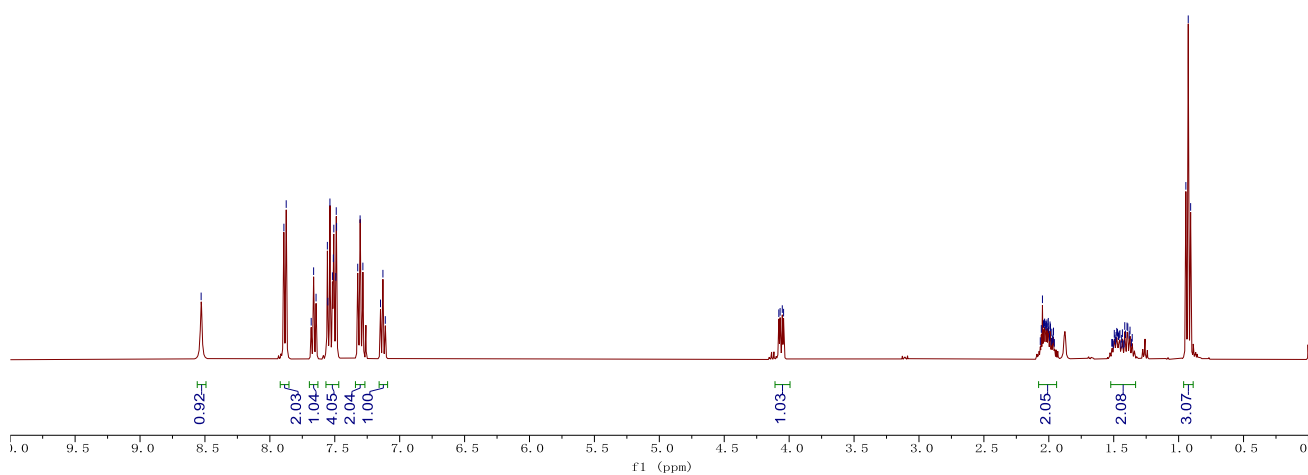

13C NMR CDCl3 100.62MHz

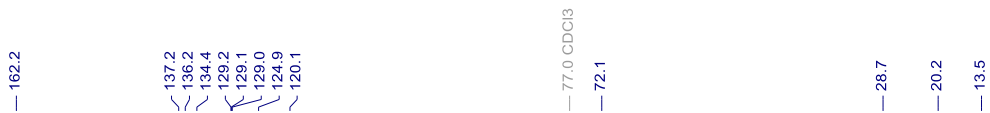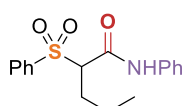

7a

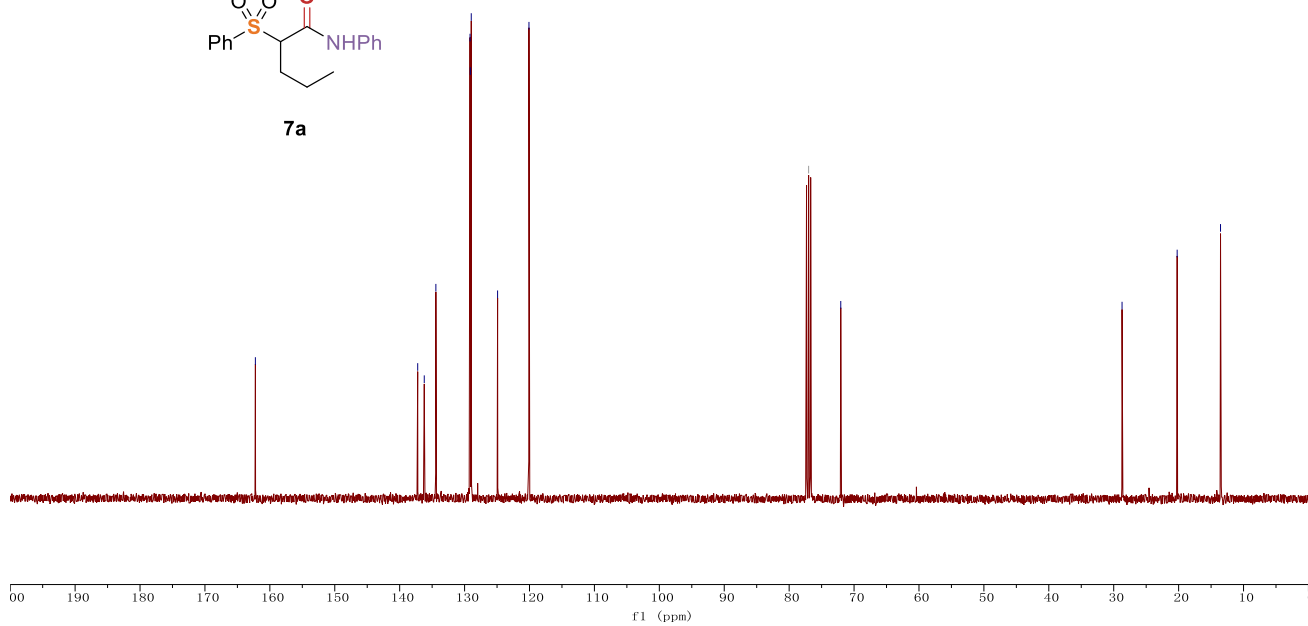

1H NMR CDCl3 400.13MHz

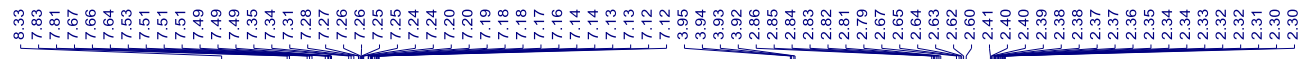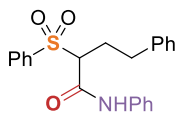

7b

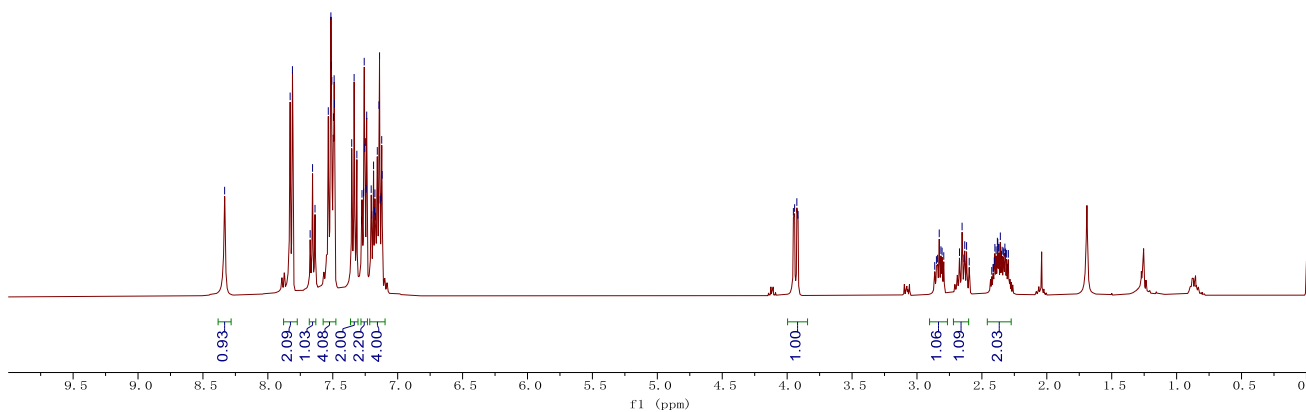

13C NMR CDCl3 100.62MHz

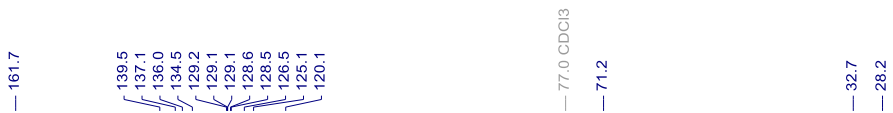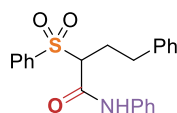

7b

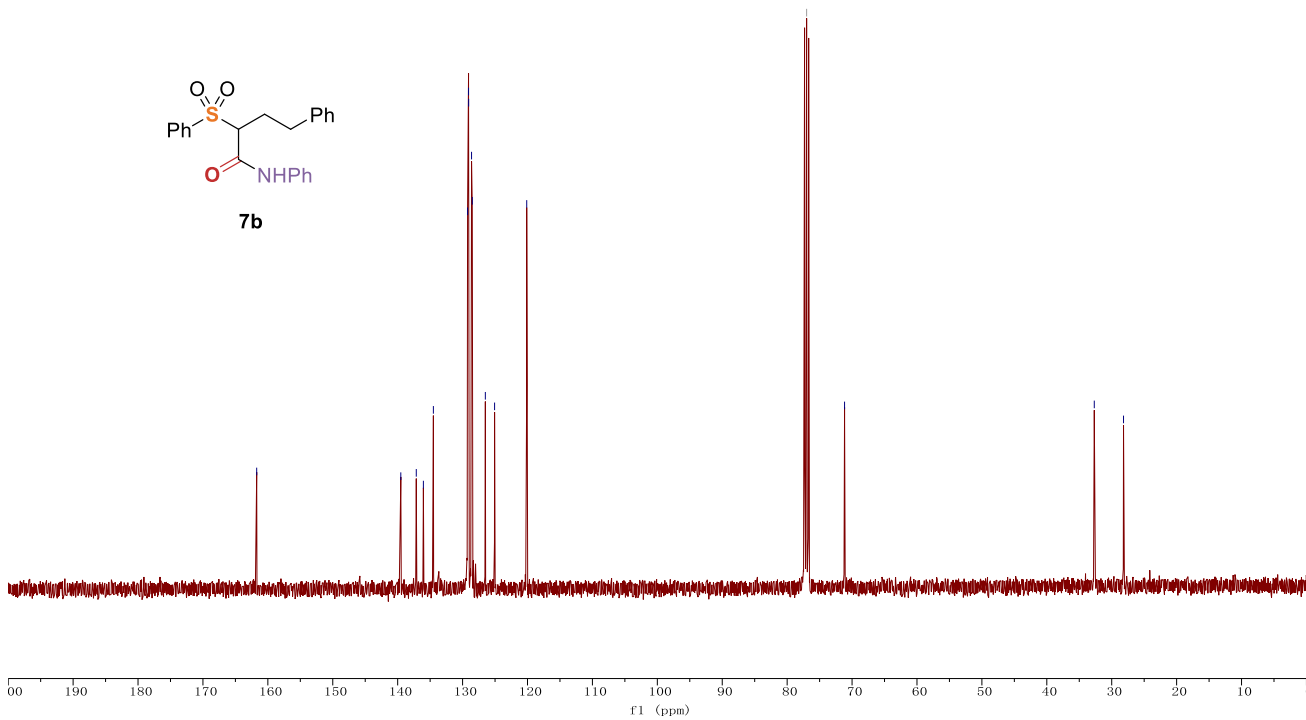

<sup>1</sup>H NMR CDCl<sub>3</sub> 400.13MHz

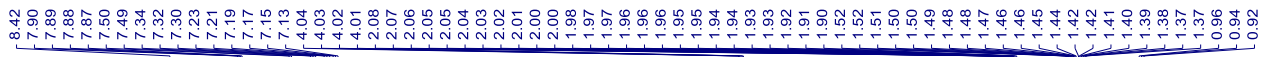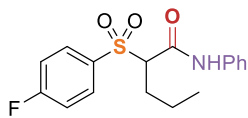

**7c**

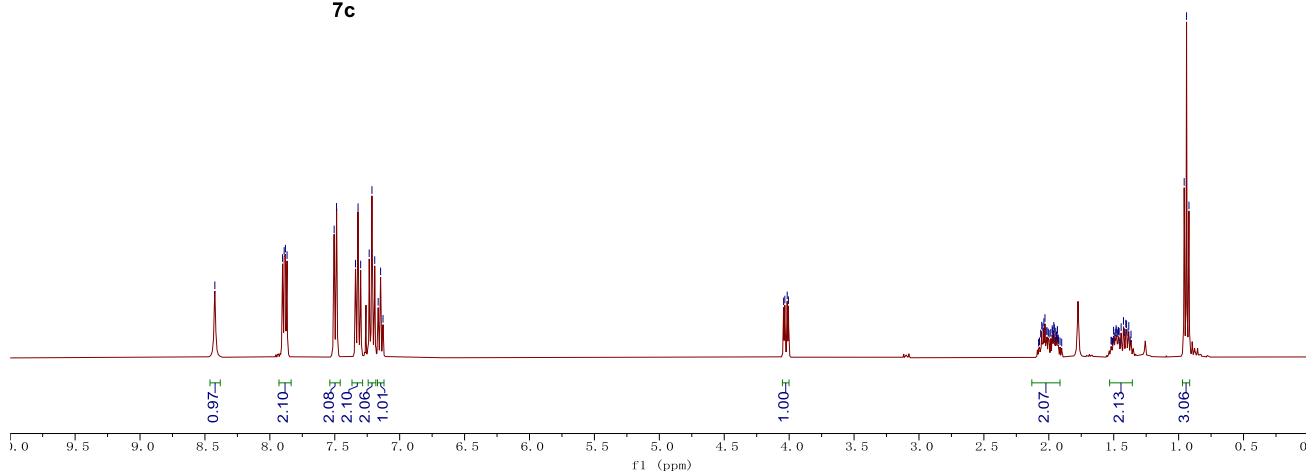

<sup>13</sup>C NMR CDCl<sub>3</sub> 100.62MHz

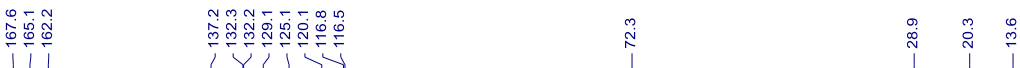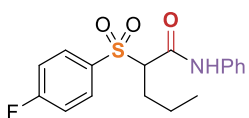

**7c**

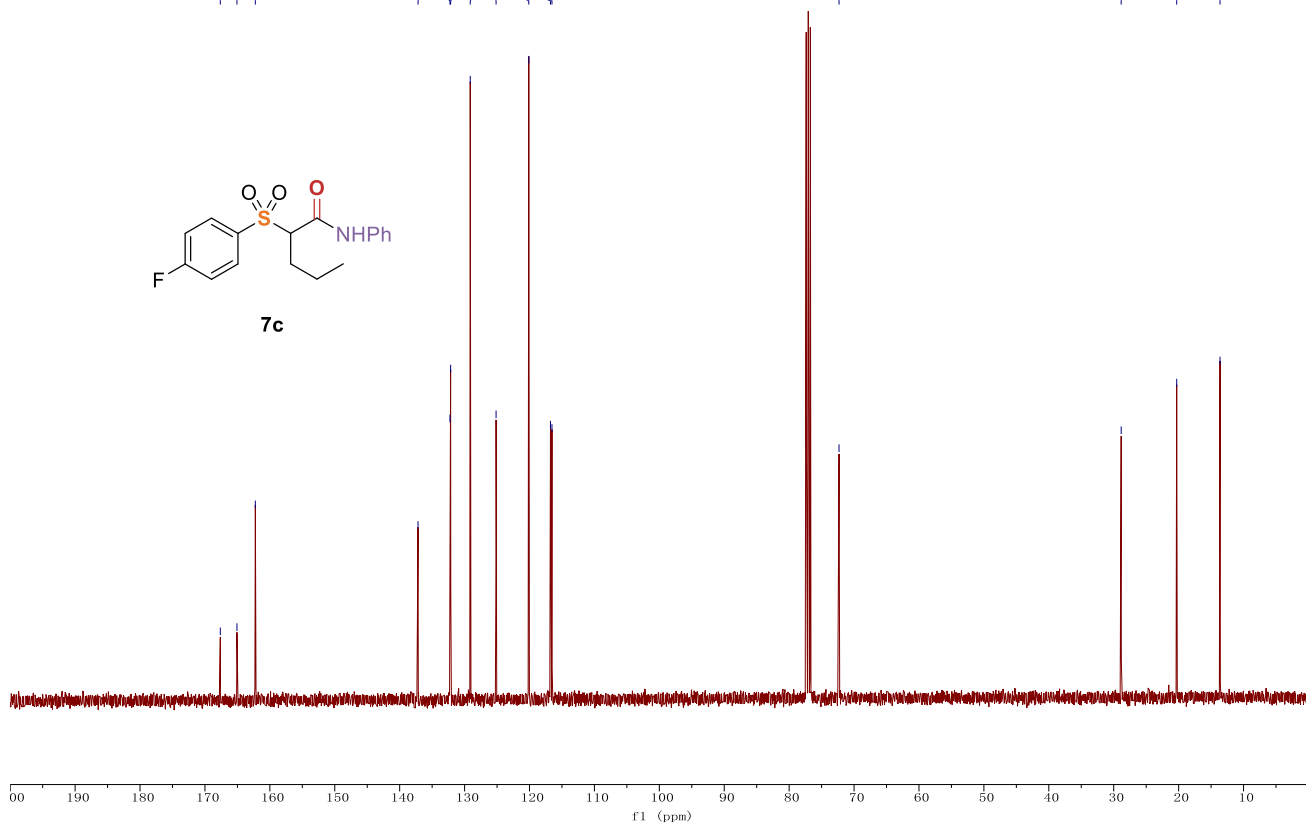

19F NMR CDCl3 376.46MHz

-101.85

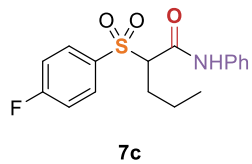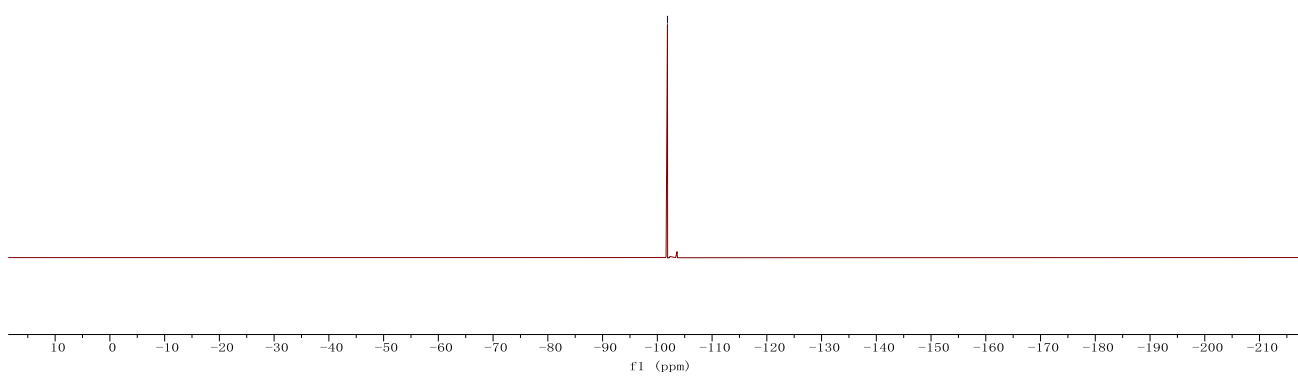

1H NMR CDCl3 400.13MHz

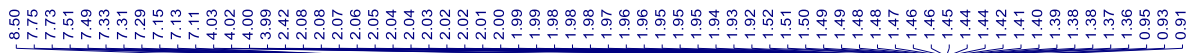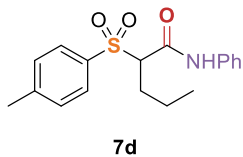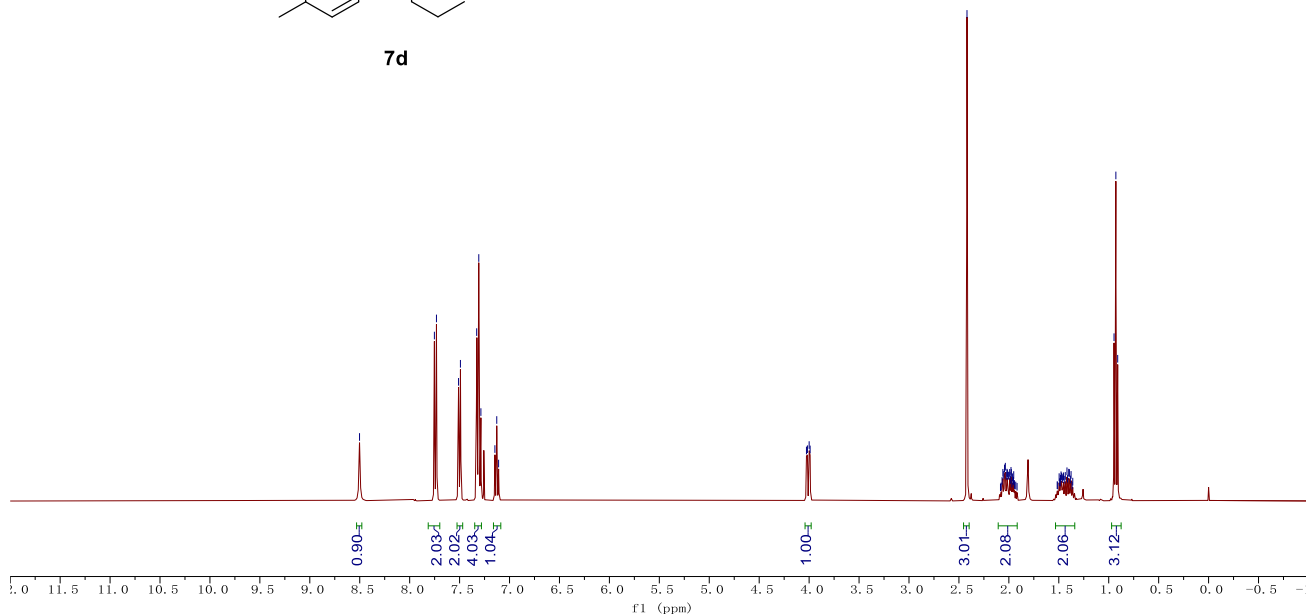

13C NMR CDCl3 100.62MHz

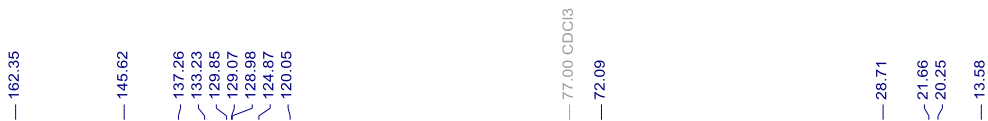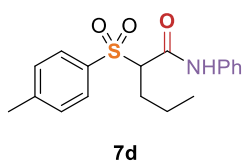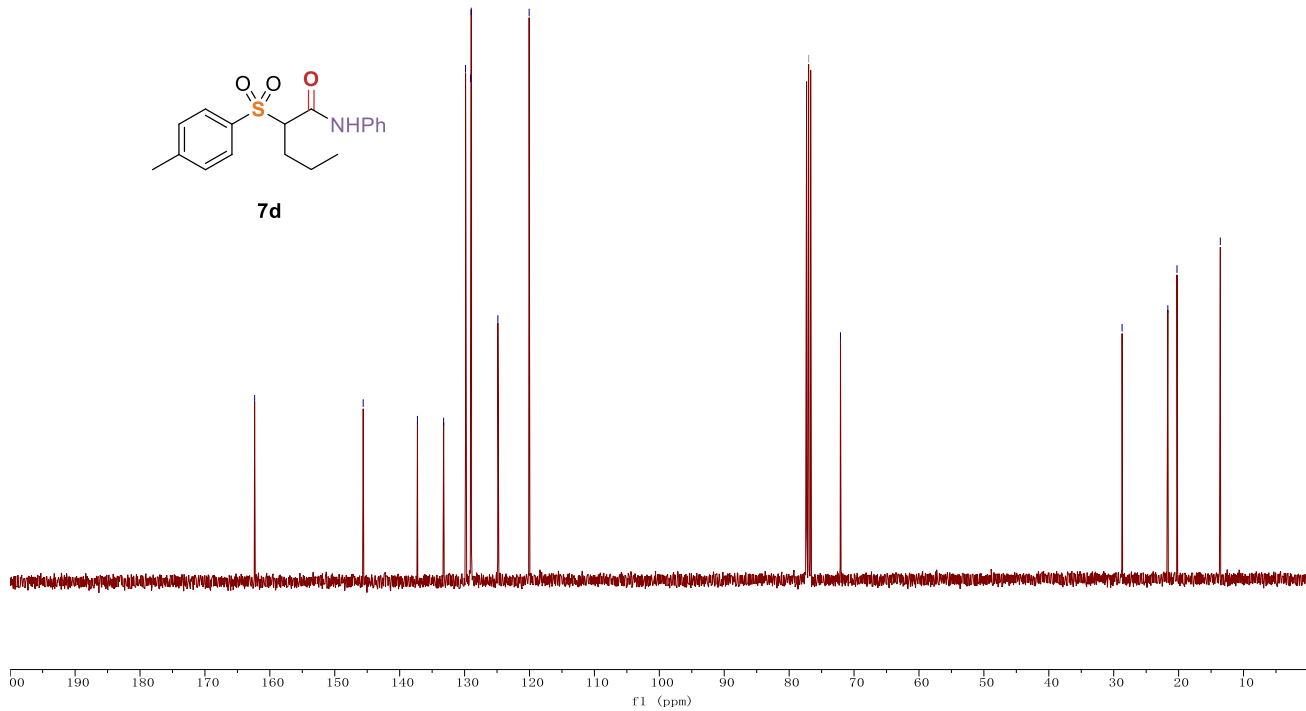

1H NMR CDCl3 400.13MHz

8.33, 7.52, 7.51, 7.33, 7.33, 7.31, 7.30, 7.29, 7.28, 7.28, 7.27, 7.27, 7.25, 7.23, 7.23, 7.22, 7.22, 7.21, 7.21, 7.20, 7.19, 7.19, 7.18, 7.17, 7.16, 7.16, 7.14, 7.13, 7.12, 3.81, 3.80, 3.78, 3.77, 2.98, 2.88, 2.86, 2.85, 2.84, 2.83, 2.72, 2.70, 2.69, 2.68, 2.67, 2.65, 2.54, 2.53, 2.52, 2.51, 2.50, 2.48, 2.47, 2.46, 2.46, 2.45, 2.44, 2.44, 2.43

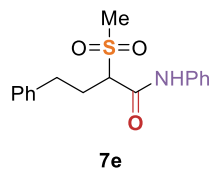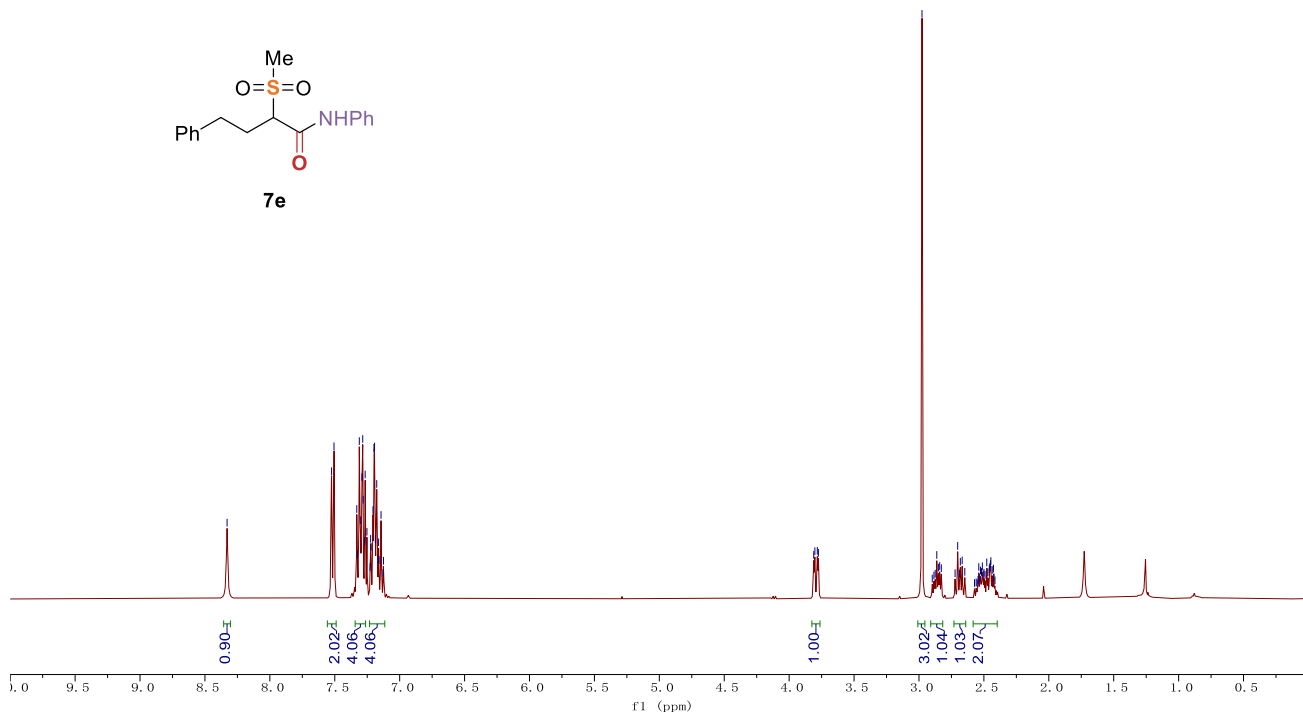

13C NMR CDCl3 100.62MHz

162.9, 139.3, 137.1, 129.1, 128.8, 128.6, 126.7, 125.3, 120.3, 70.5, 37.8, 32.9, 28.7

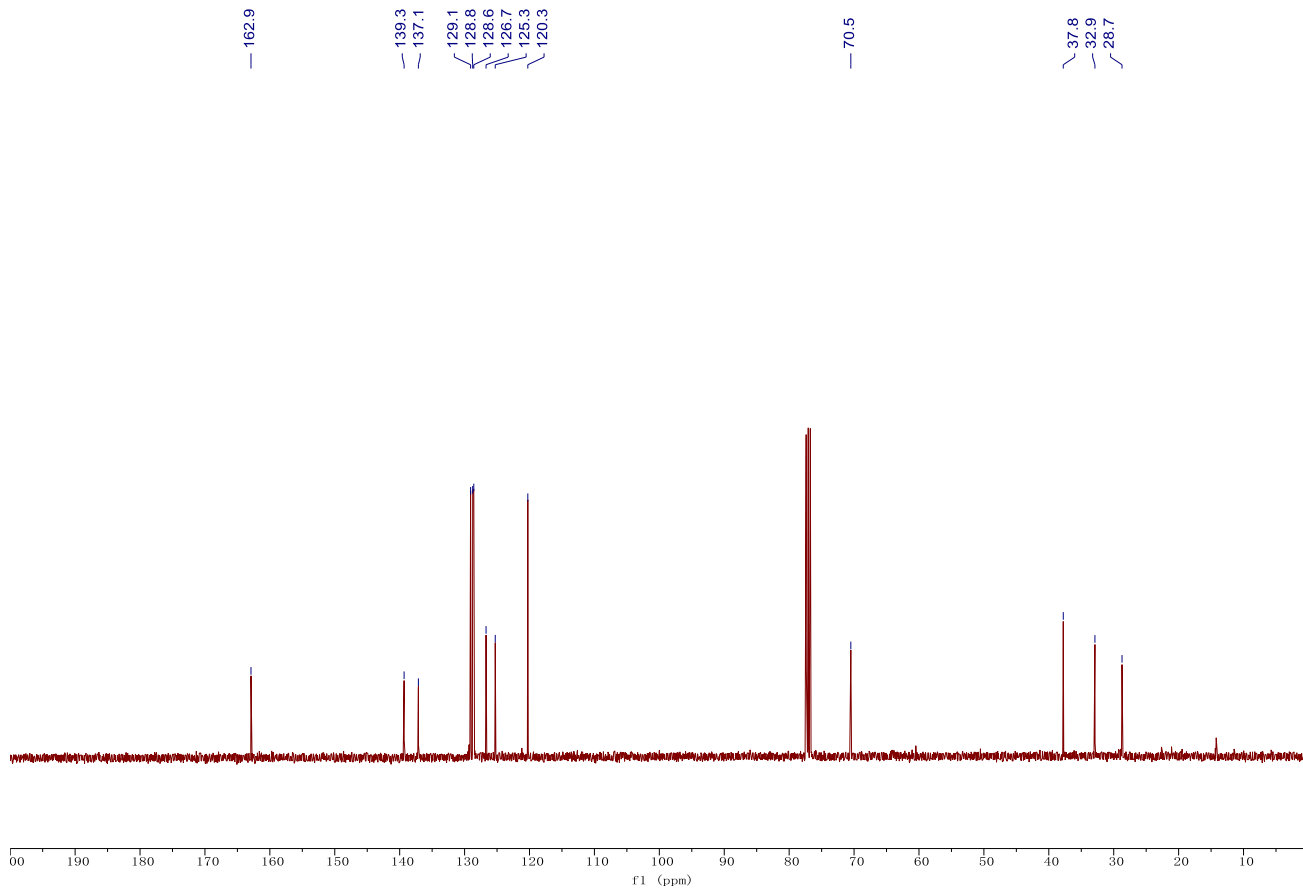

1H NMR CDCl3 400.13MHz

7.47  
7.46  
7.45  
7.44  
7.34  
7.33  
7.33  
7.32  
7.32  
7.31  
7.31  
7.30  
7.30  
7.29  
7.29

4.90

2.13

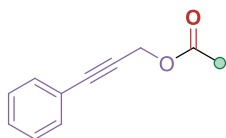

7f

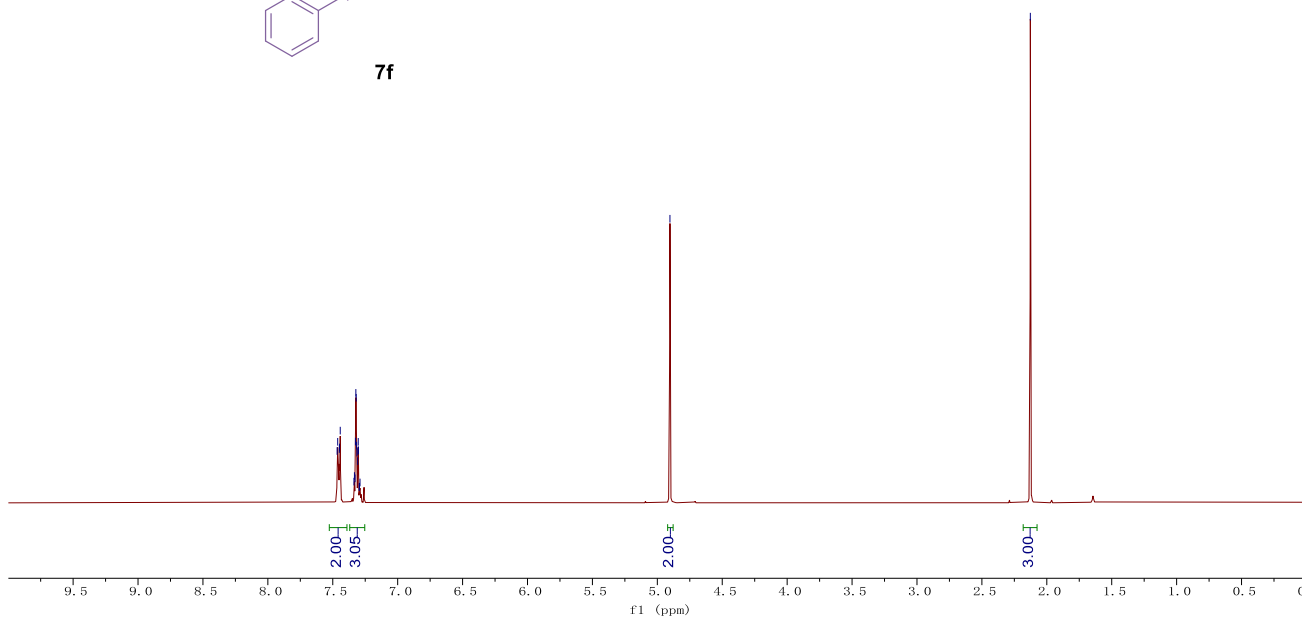

13C NMR CDCl3 100.62MHz

170.3

131.8  
128.7  
128.3  
122.1

86.4  
82.9  
77.0 CDCl3

52.8

20.7

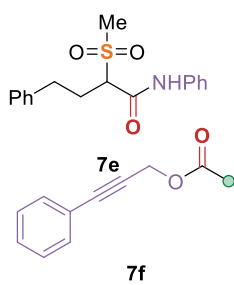

7f

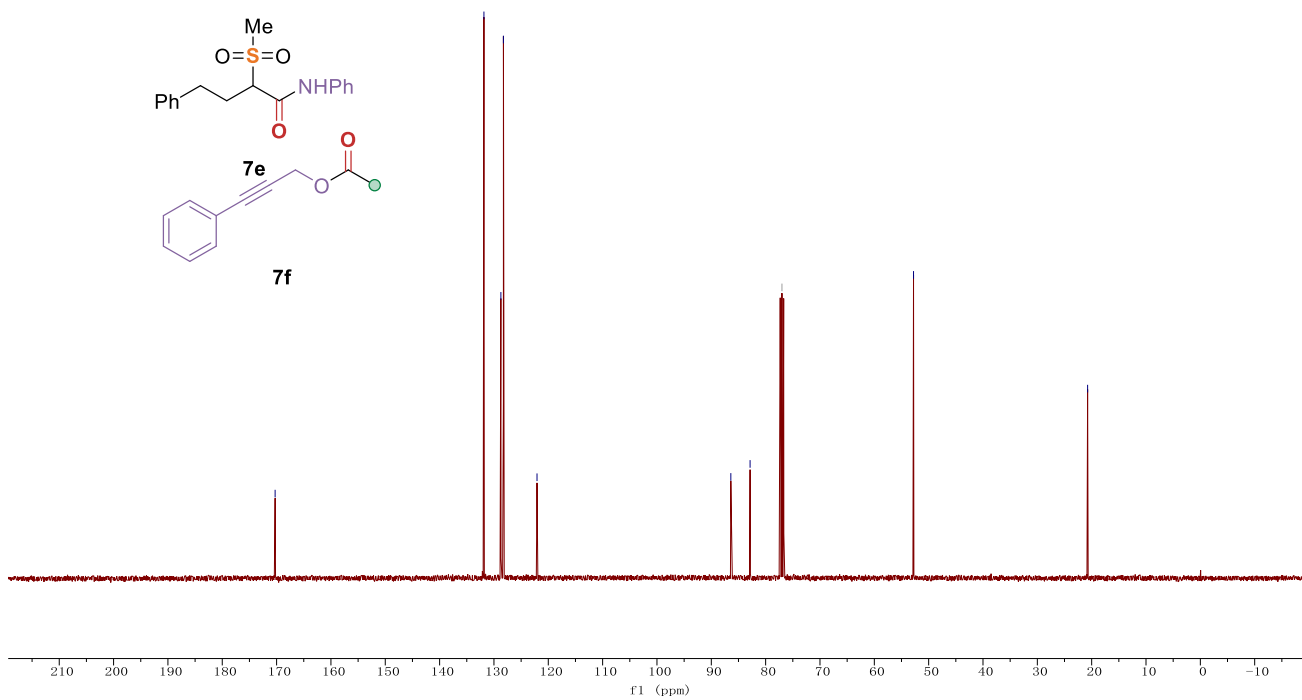

1H NMR CDCl3 400.13MHz

8.18  
7.51  
7.49  
7.29  
7.27  
7.25  
7.10  
7.08  
7.06

2.13

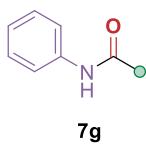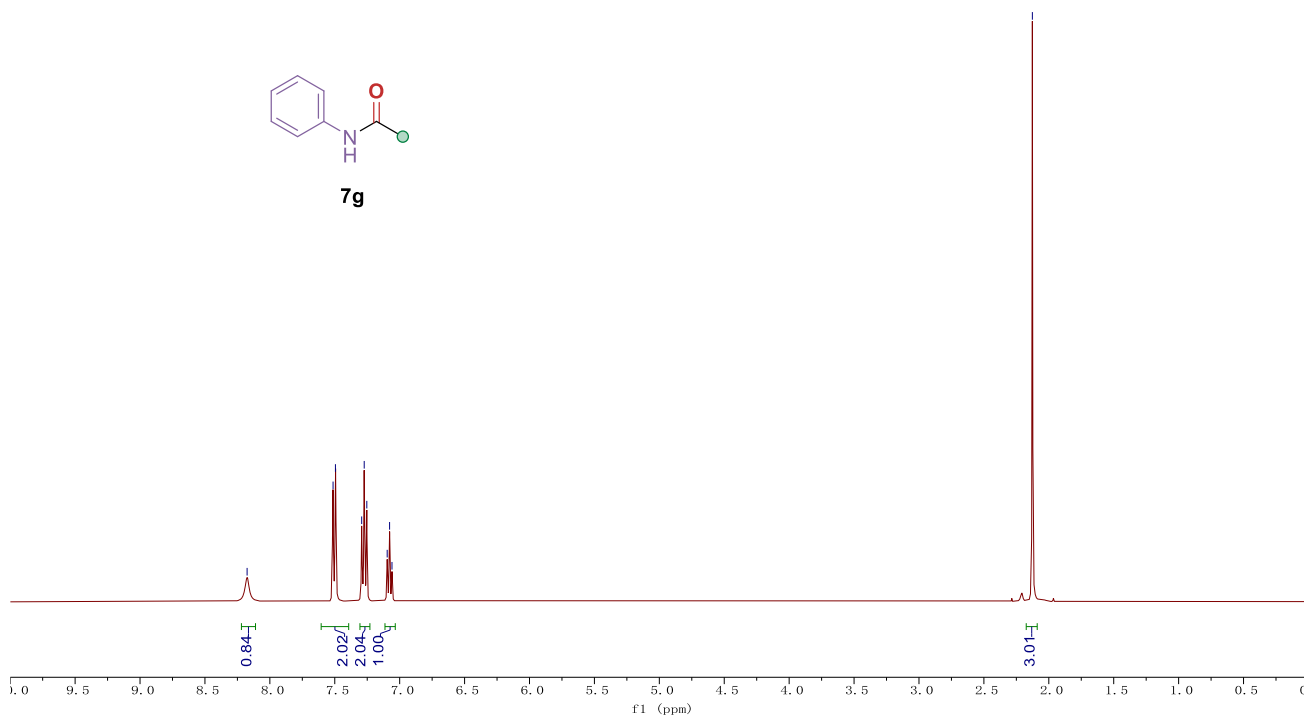

13C NMR CDCl3 100.62MHz

169.0

138.0

128.8

124.2

120.1

77.0 CDCl3

24.3

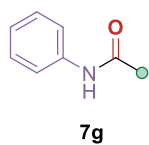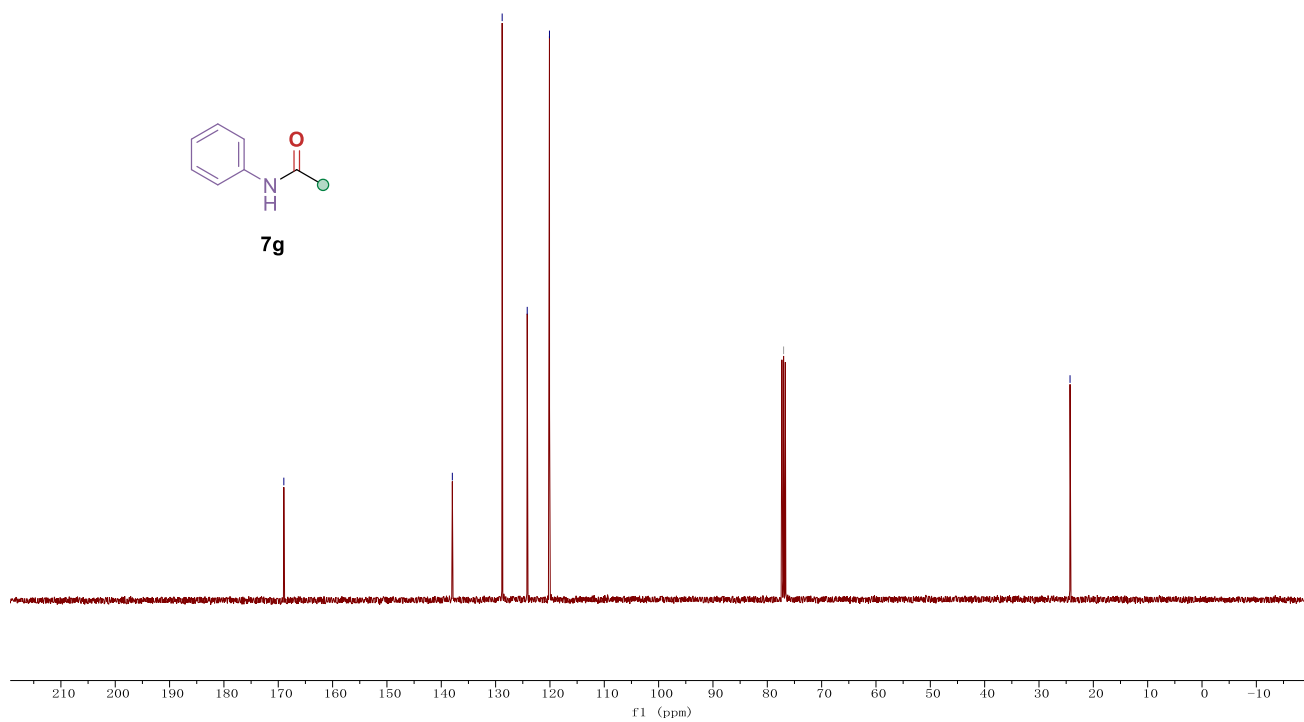



1H NMR CDCl3 400.13MHz

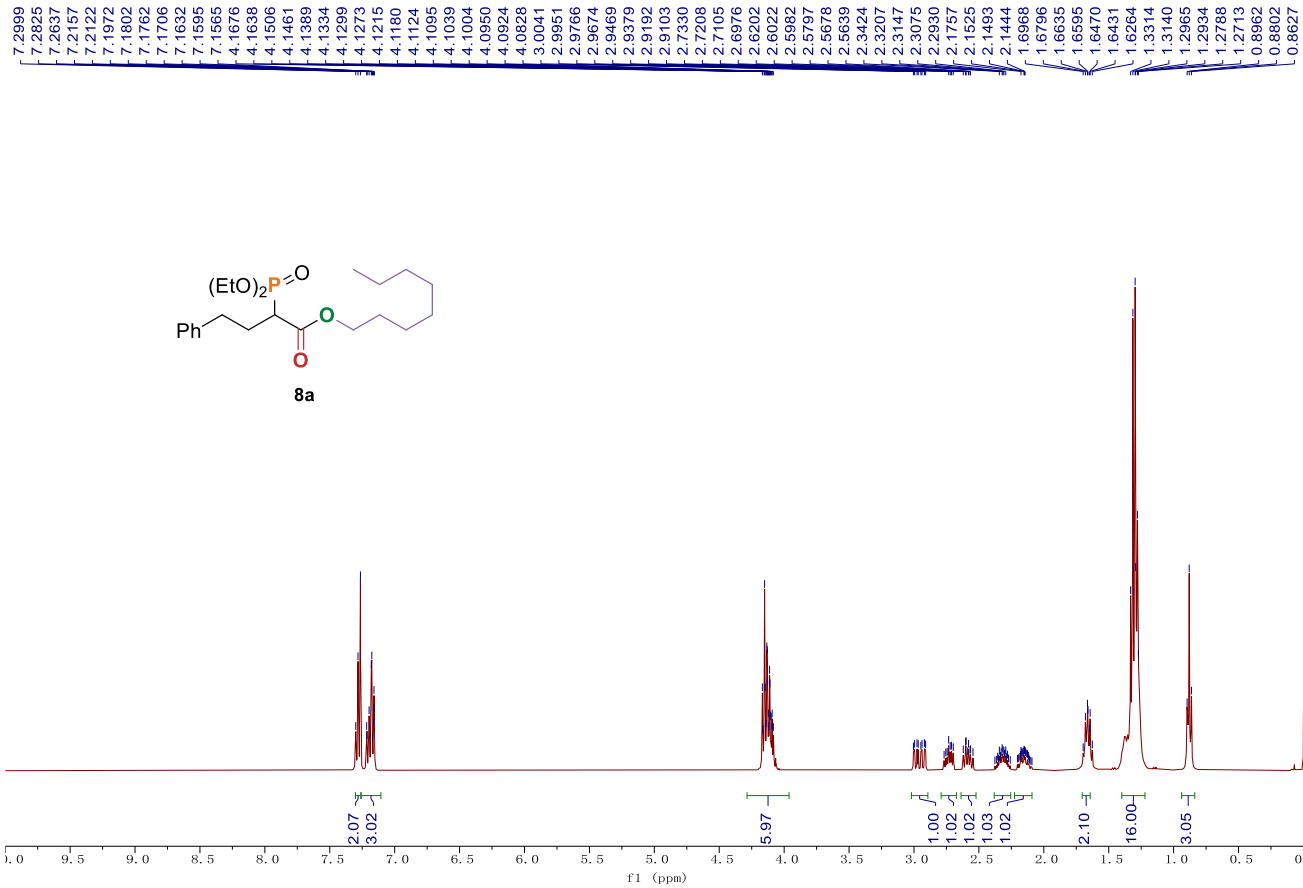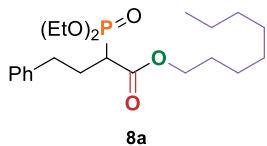

13C NMR CDCl3 100.62MHz

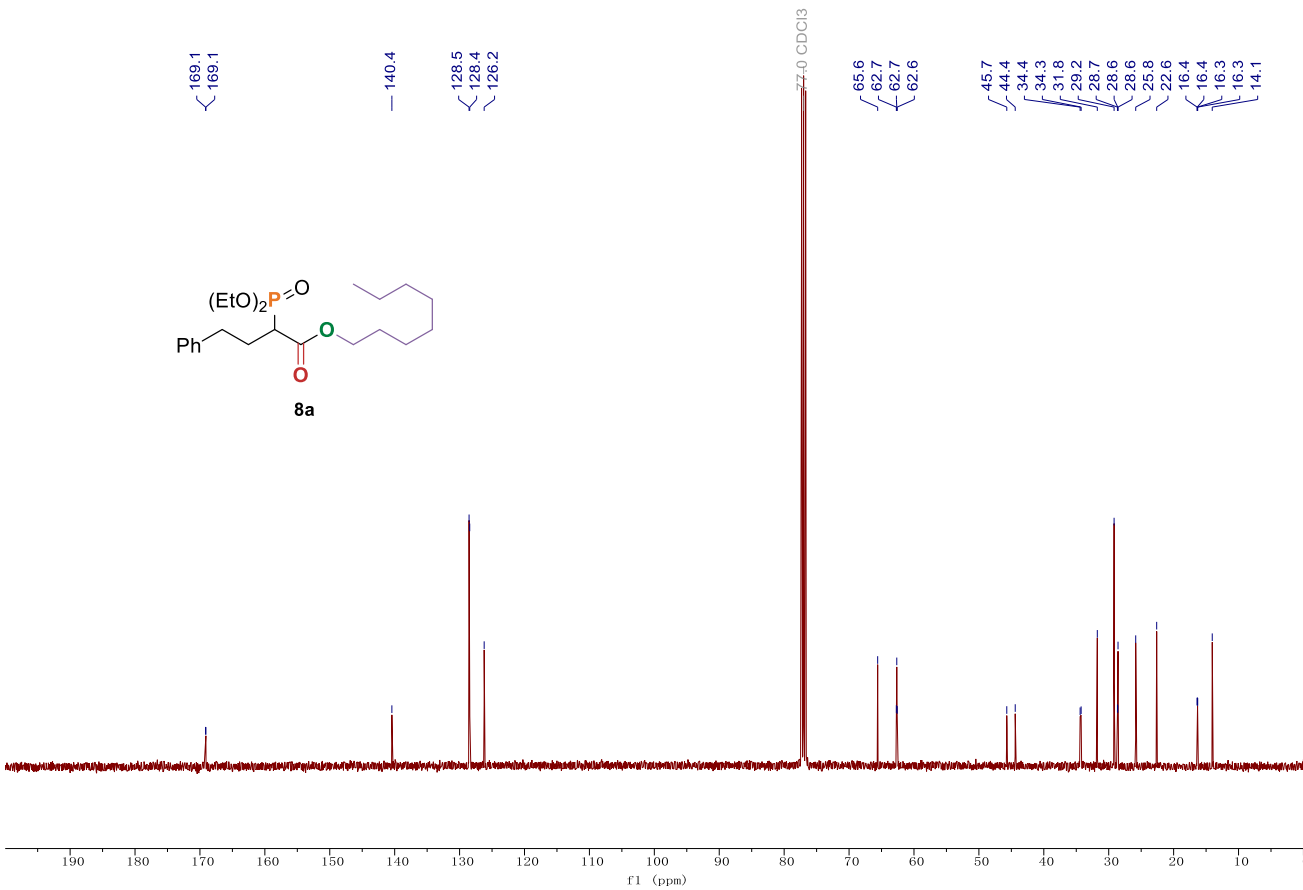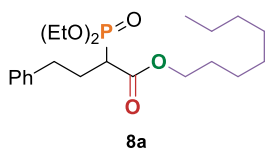

31P NMR CDCl3 161.97MHz

— 22.67

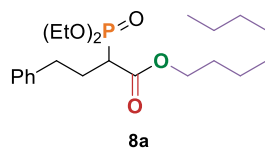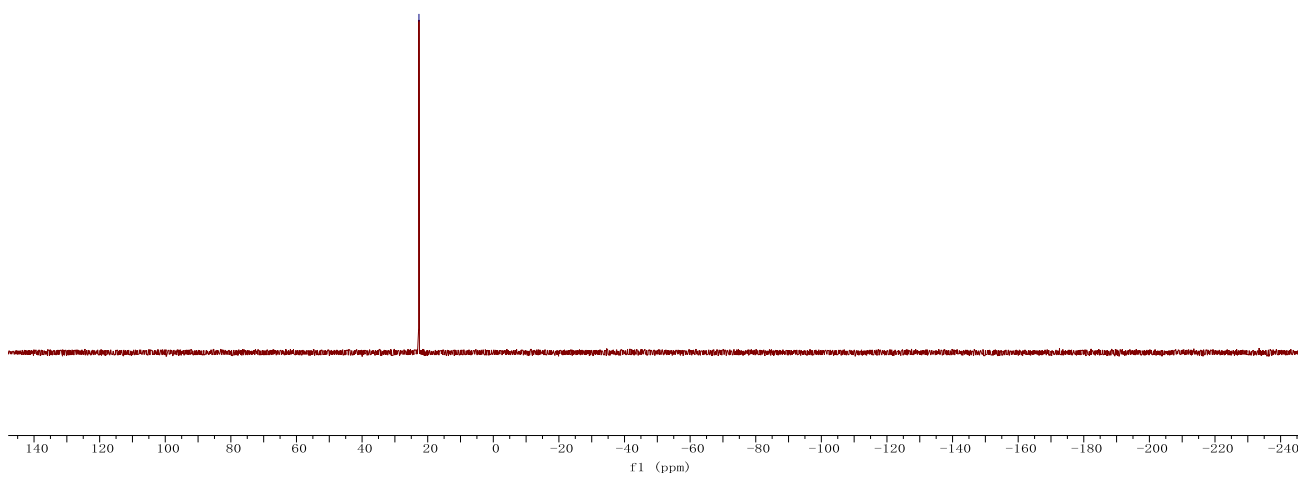

1H NMR CDCl3 700.17MHz

7.29, 7.28, 7.27, 7.21, 7.20, 7.19, 7.17, 7.16, 4.17, 4.16, 4.15, 4.14, 4.14, 4.13, 4.13, 4.12, 4.12, 4.12, 4.11, 4.10, 4.10, 4.09, 4.09, 4.08, 2.98, 2.98, 2.97, 2.96, 2.95, 2.95, 2.94, 2.93, 2.73, 2.72, 2.72, 2.71, 2.60, 2.59, 2.59, 2.58, 2.58, 2.57, 2.56, 2.32, 2.32, 2.32, 2.31, 2.30, 2.15, 2.15, 2.15, 1.66, 1.66, 1.65, 1.65, 1.64, 1.63, 1.63, 1.44, 1.42, 1.42, 1.41, 1.40, 1.32, 1.31, 1.31, 1.30, 1.30, 1.29, 0.95, 0.94

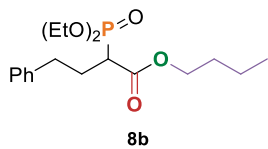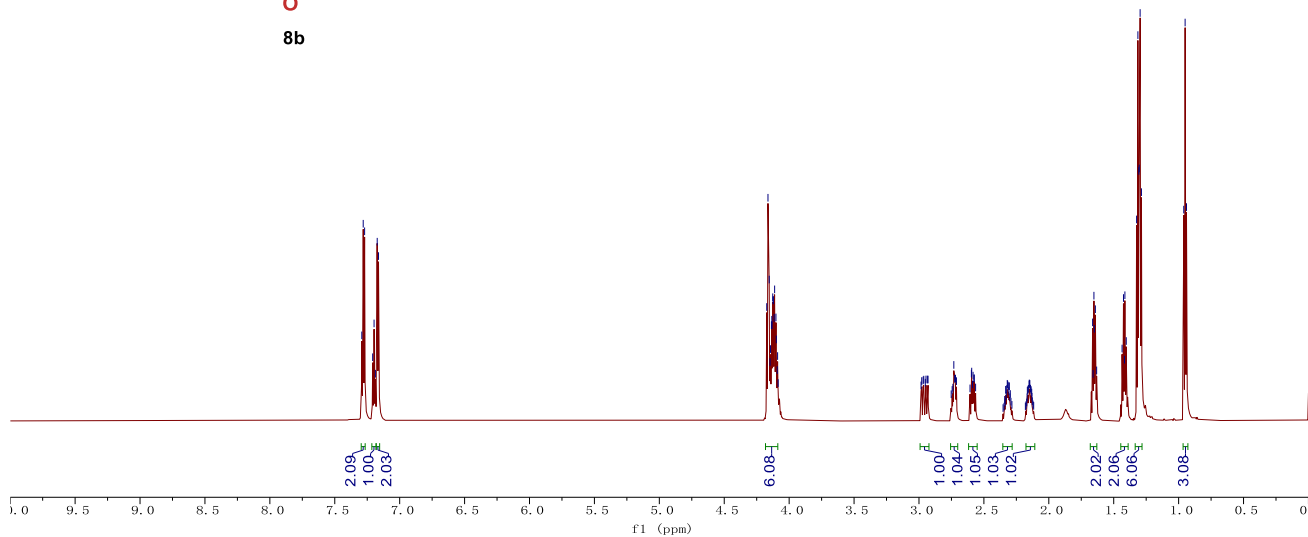

13C NMR CDCl3 176.08MHz

169.1, 169.0, 140.4, 128.5, 128.4, 126.2, 77.0 CDCl3, 65.2, 62.7, 62.6, 62.6, 62.6, 45.4, 44.6, 34.3, 34.2, 30.5, 28.6, 28.6, 19.0, 16.3, 16.3, 16.3, 13.6, 13.6

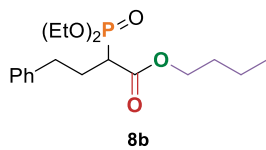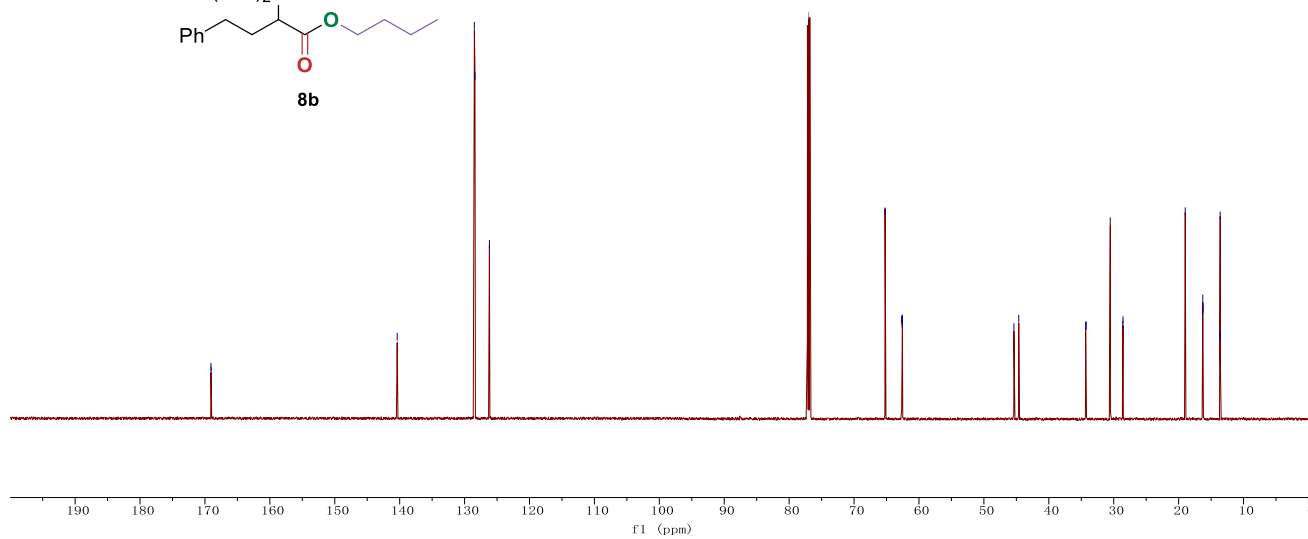

31P NMR CDCl3 161.97MHz

— 22.65

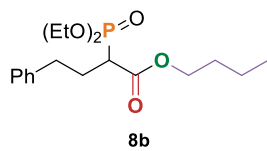

1H NMR CDCl3 700.17MHz

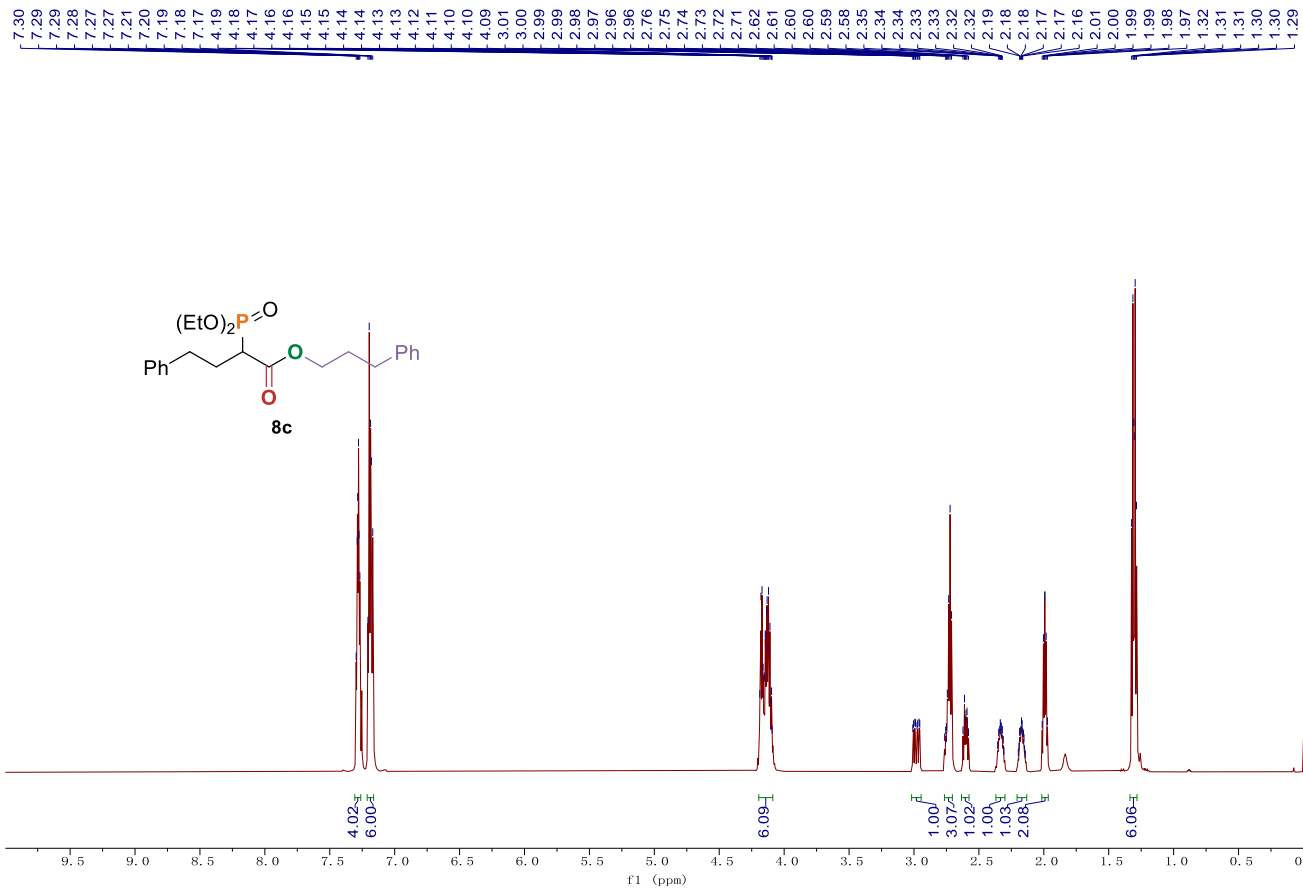

13C NMR CDCl3 176.08MHz

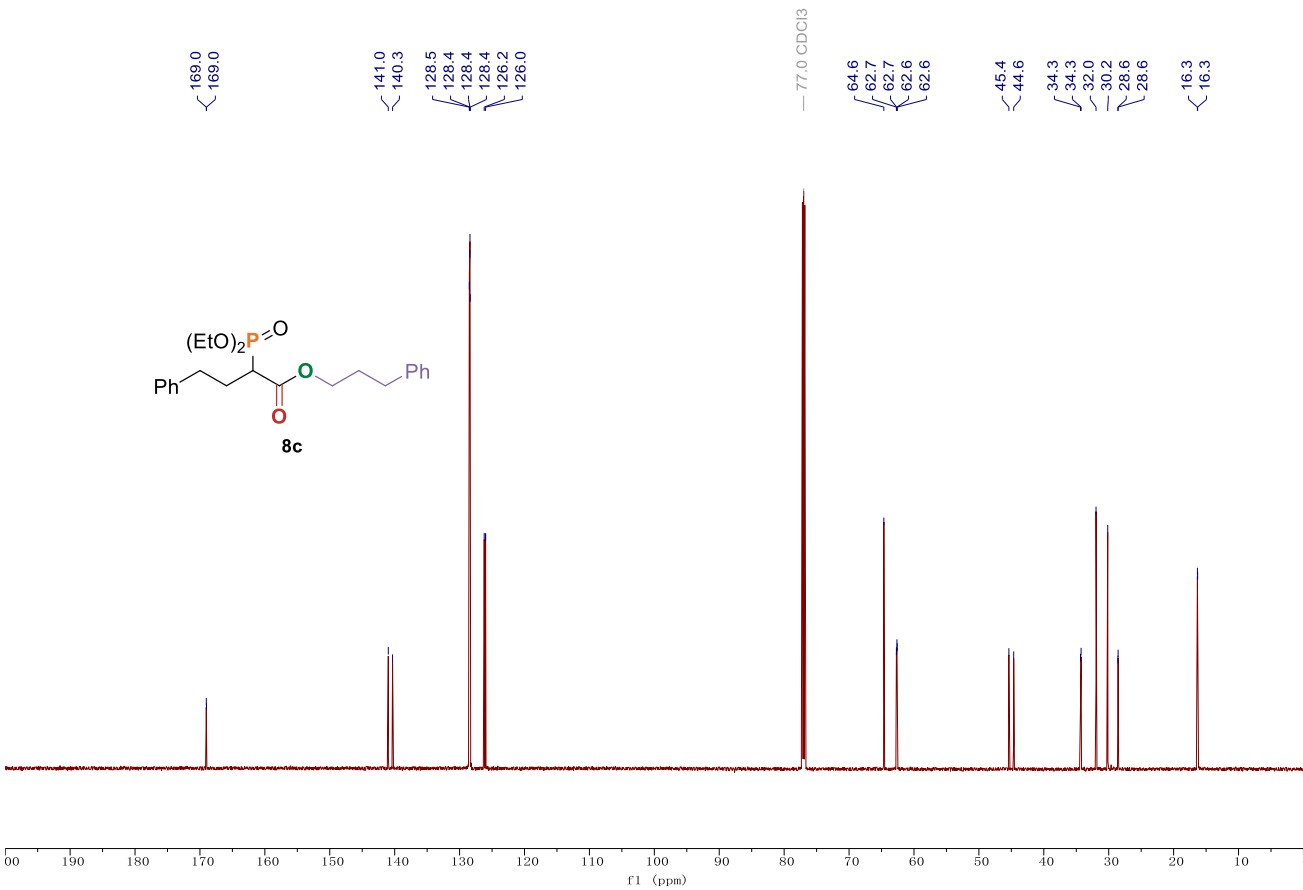

31P NMR CDCl3 161.97MHz

22.63

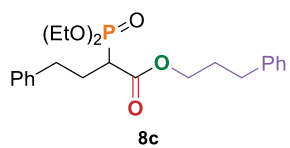

1H NMR CDCl3 400.13MHz

7.30 7.28 7.26 7.22 7.20 7.18 7.17 7.16 5.85 5.82 5.81 5.78 5.17 5.16 5.12 5.12 5.11 5.11 5.09 5.08 4.23 4.23 4.22 4.21 4.20 4.19 4.17 4.16 4.15 4.15 4.14 4.13 4.13 4.12 4.12 4.11 4.11 4.10 4.10 4.09 4.09 4.08 4.08 3.01 3.00 2.98 2.97 2.95 2.94 2.92 2.91 2.73 2.60 2.59 2.59 2.57 2.46 2.45 2.44 2.44 2.44 2.43 2.42 2.42 2.41 2.41 1.33 1.30 1.28

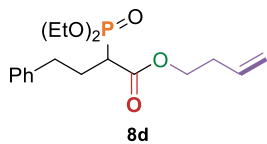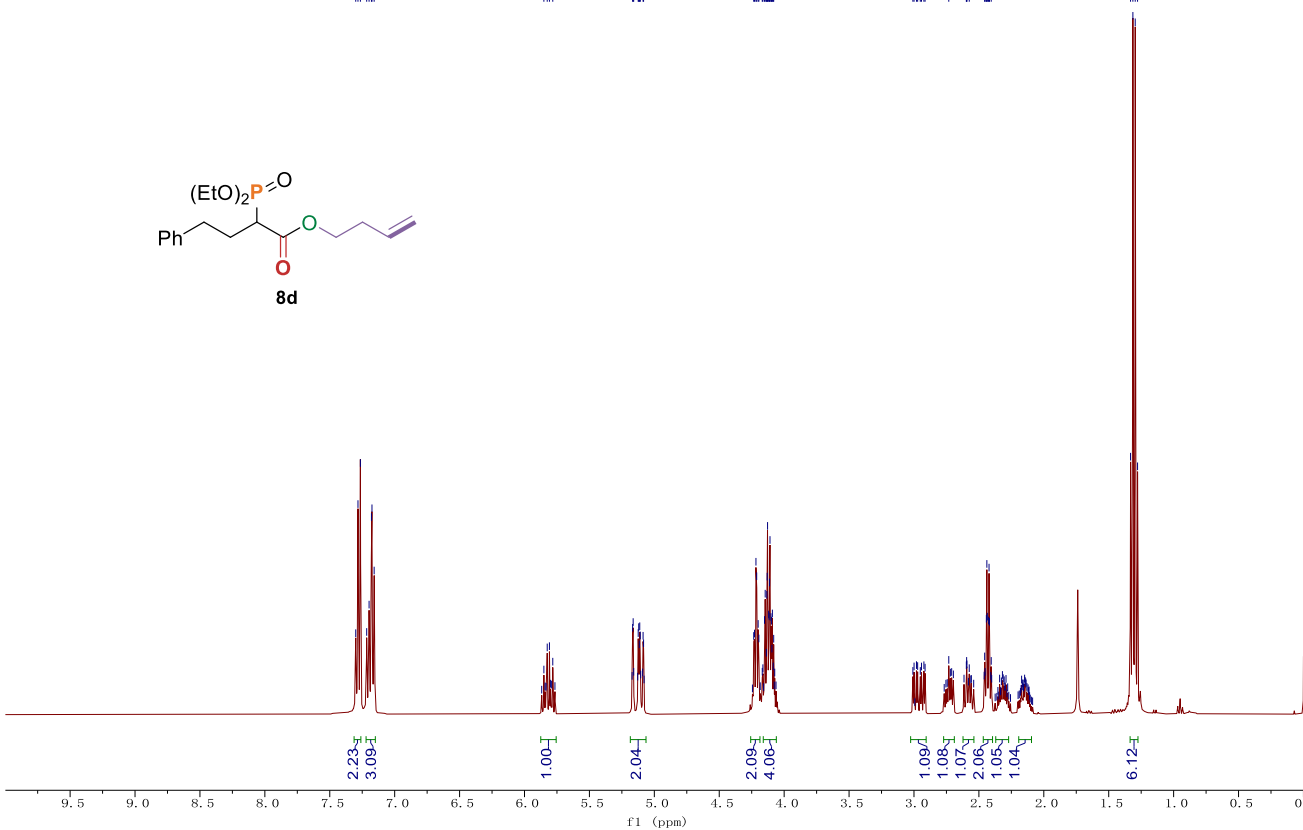

13C NMR CDCl3 100.62MHz

169.1 169.0 140.4 133.8 128.5 128.4 126.2 117.4 77.0 CDCl3 64.5 62.8 62.7 62.6 45.7 44.4 34.4 34.2 32.9 28.6 28.6 16.4 16.3

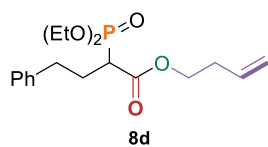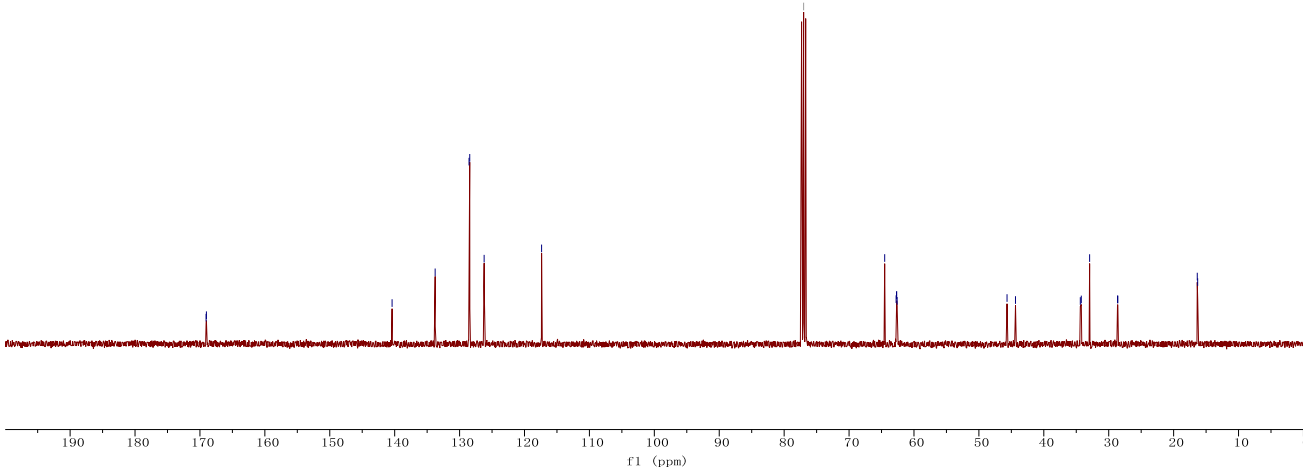

31P NMR CDCl3 161.97MHz

— 22.46

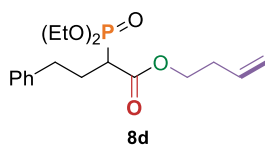



1H NMR CDCl3 400.13MHz

4.23  
4.21  
4.20  
4.20  
4.19  
4.19  
4.18  
4.17  
4.17  
4.16  
4.16  
4.15  
4.14  
4.14  
4.12  
3.34  
3.33  
3.31  
3.31  
3.28  
3.27  
3.25  
3.24  
3.02  
3.01  
2.99  
2.97  
2.94  
2.93  
2.92  
2.64  
2.63  
2.59  
2.58  
2.55  
2.54  
1.67  
1.66  
1.65  
1.63  
1.62  
1.37  
1.35  
1.34  
1.32  
1.31  
1.29  
1.27  
1.25  
0.87  
0.85

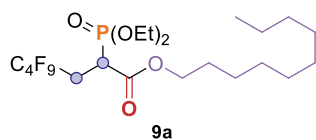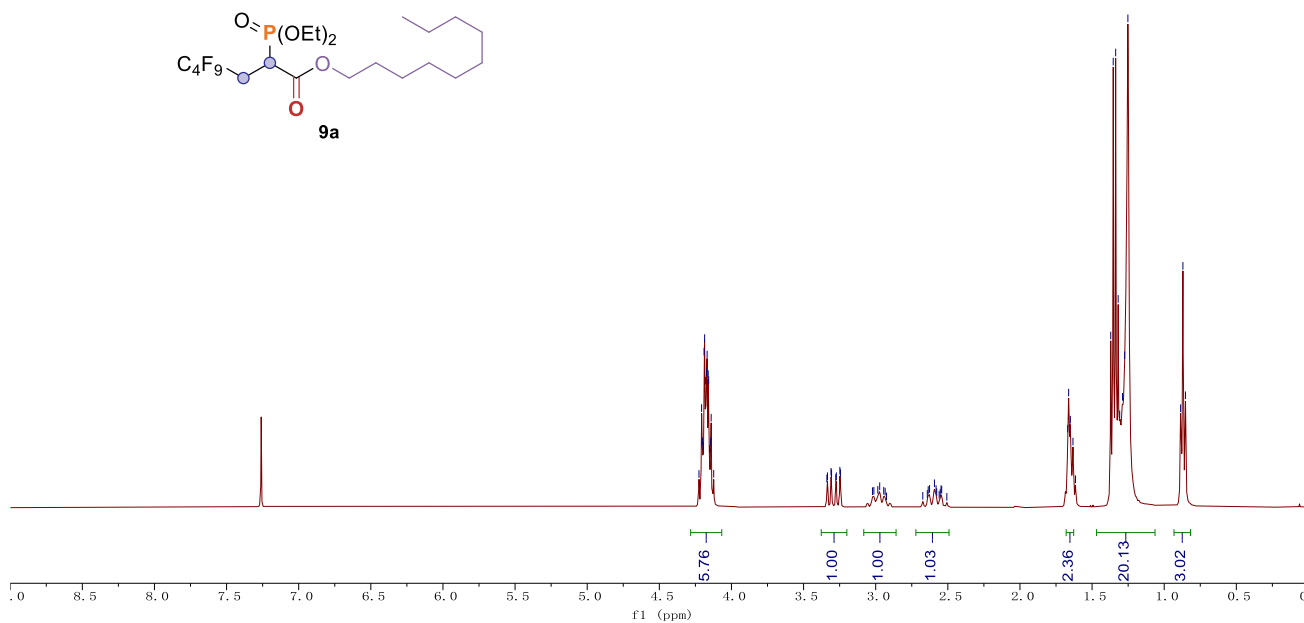

13C NMR CDCl3 176.08MHz

167.6  
167.6

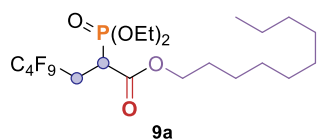

77.0 CDCl3

66.4  
63.6  
63.6  
63.3  
63.3  
38.4  
37.7  
31.8  
29.5  
29.5  
29.3  
29.1  
28.9  
28.8  
28.7  
28.4  
25.7  
22.6  
16.3  
16.2  
14.1

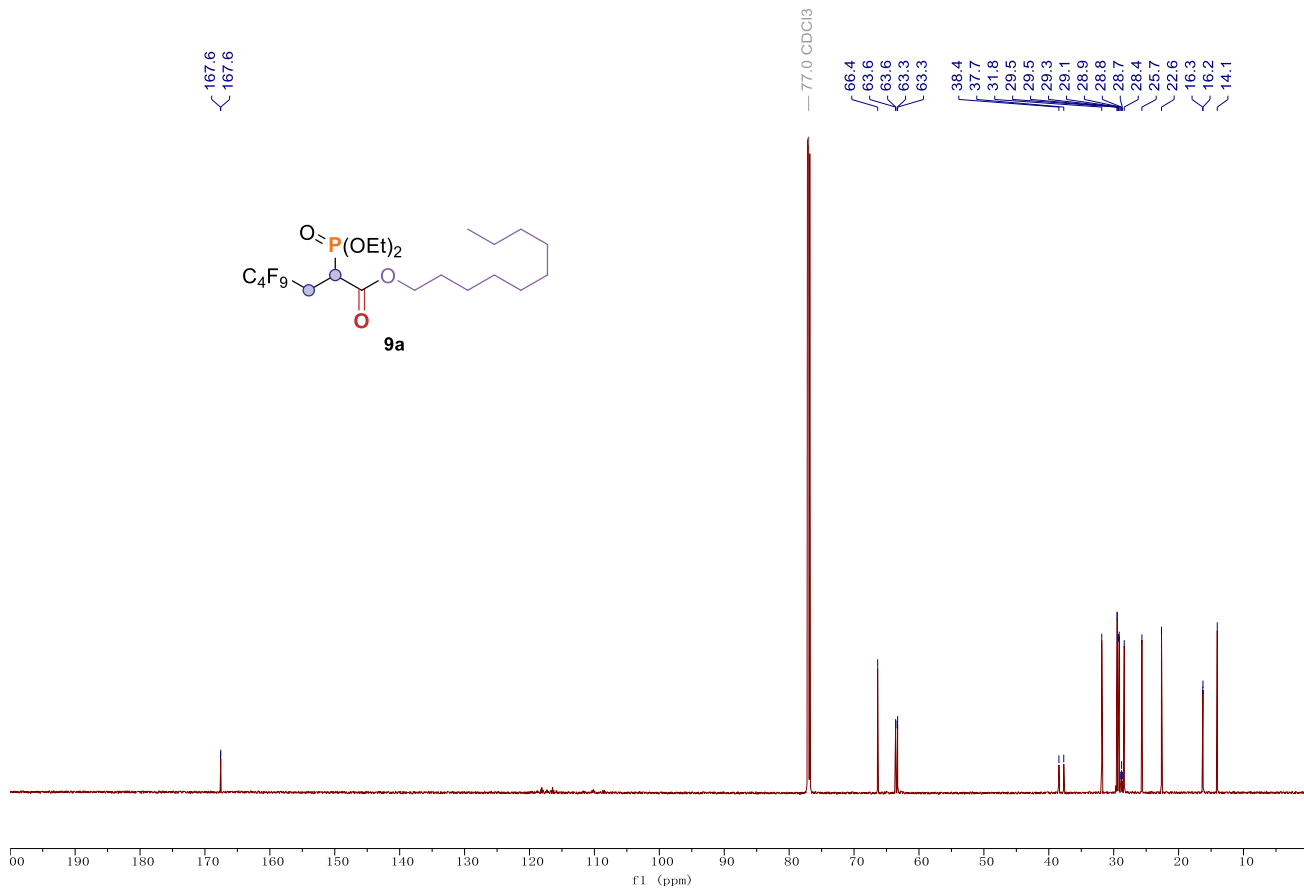

19F NMR CDCl3 376.46MHz

-81.00  
-81.01  
-81.03  
-81.04  
-81.06  
-81.07  
-114.46  
-114.47  
-114.49  
-114.50  
-114.54  
-124.30  
-124.31  
-124.32  
-124.33  
-124.35  
-124.36  
-124.37  
-124.38  
-124.40  
-125.93  
-125.94  
-125.96  
-125.97  
-125.98  
-125.99  
-126.01  
-126.02

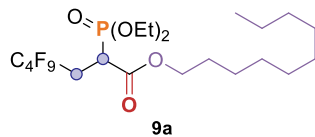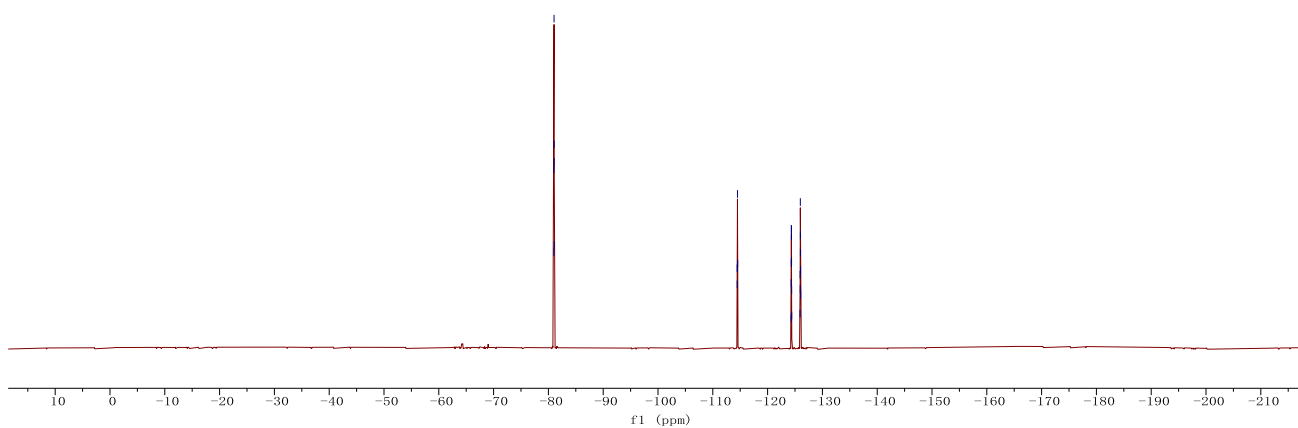

31P NMR CDCl3 161.97MHz

19.95

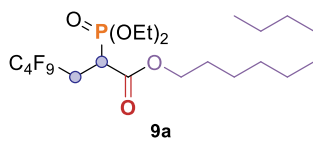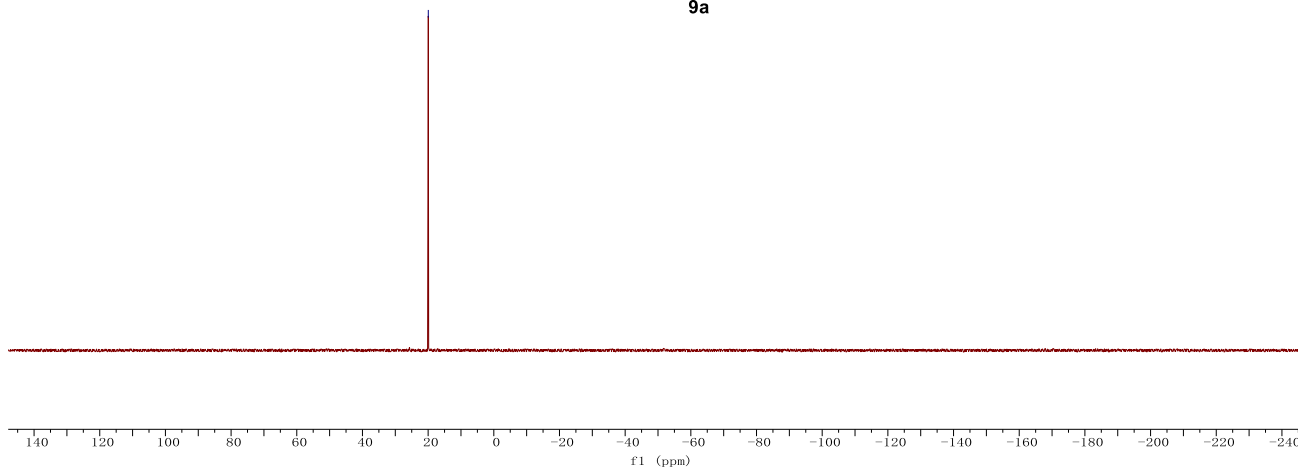

1H NMR CDCl3 400.13MHz

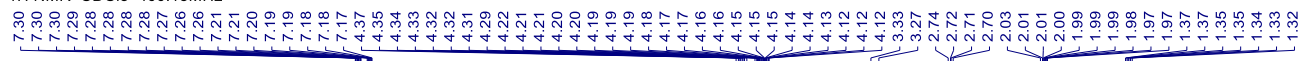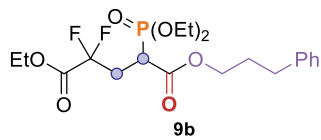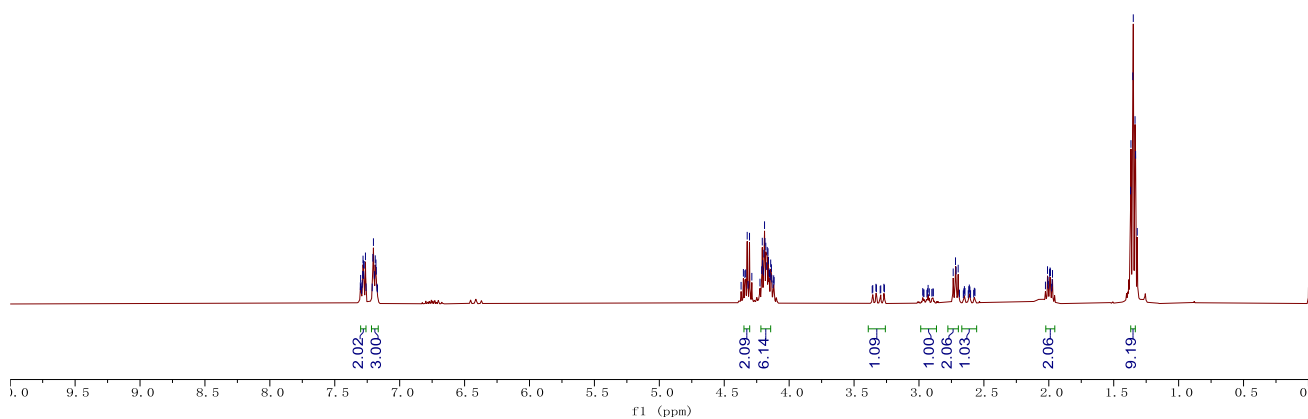

1H NMR CDCl3 100.62MHz

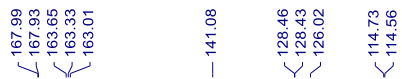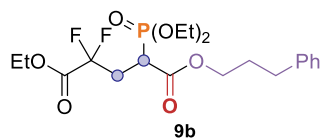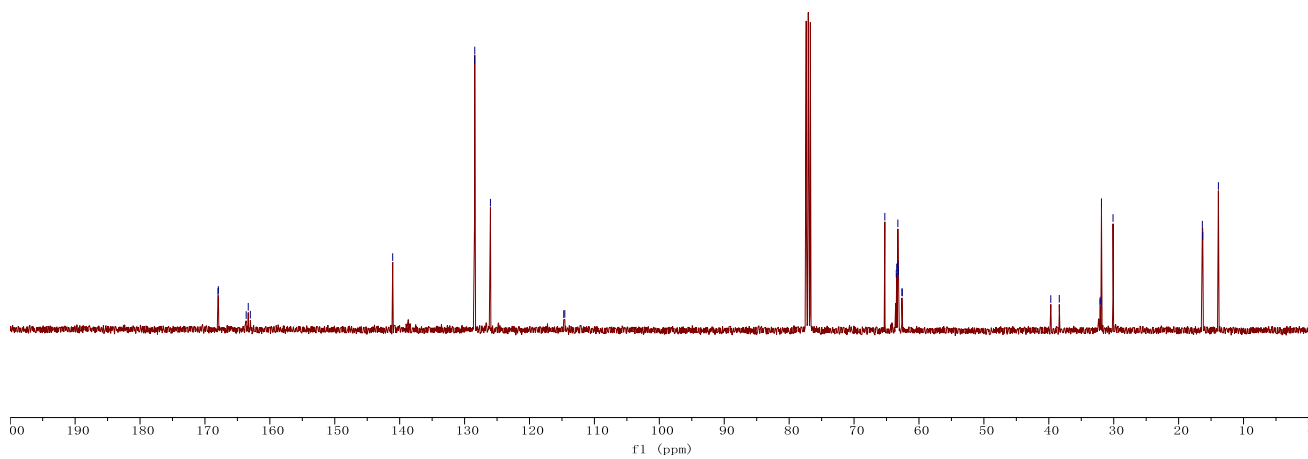

19F NMR CDCl3 376.46MHz

-104.13  
-106.22  
-106.36  
-106.45  
-106.47  
-106.48  
-106.63  
-107.33

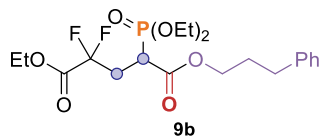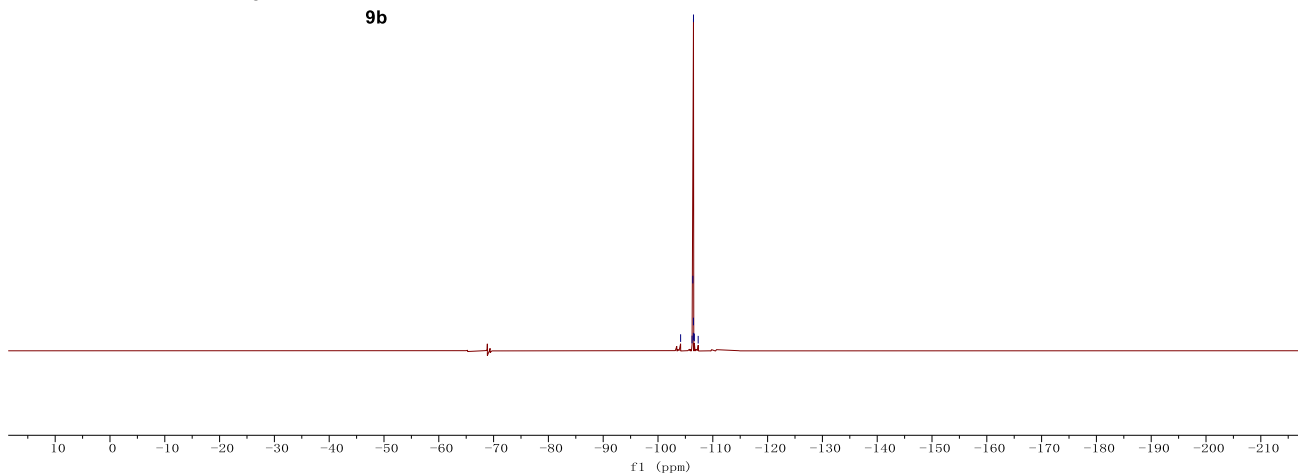

31P NMR CDCl3 161.97MHz

20.57

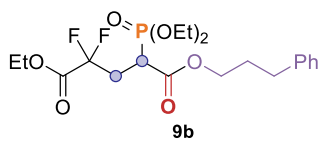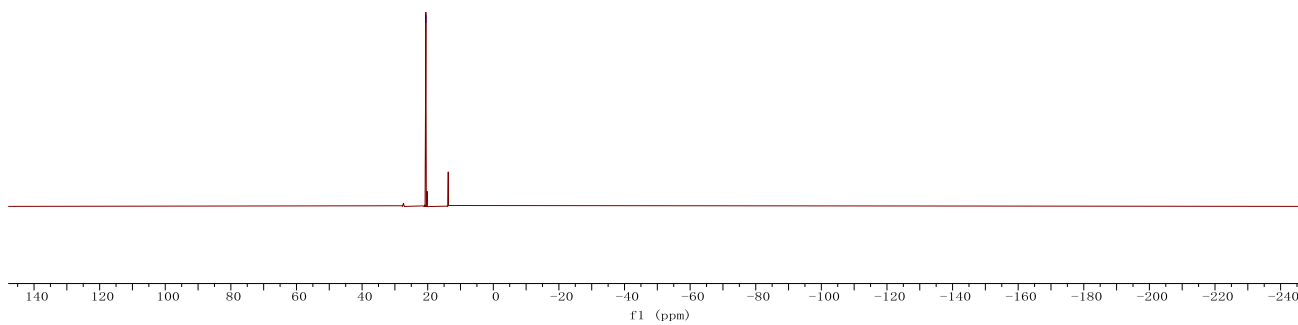

1H NMR CDCl3 400.13MHz

4.23  
4.22  
4.21  
4.20  
4.20  
4.18  
4.18  
4.16  
4.14  
3.00  
2.94  
1.37  
1.36  
1.34  
1.31  
1.29  
1.28

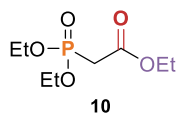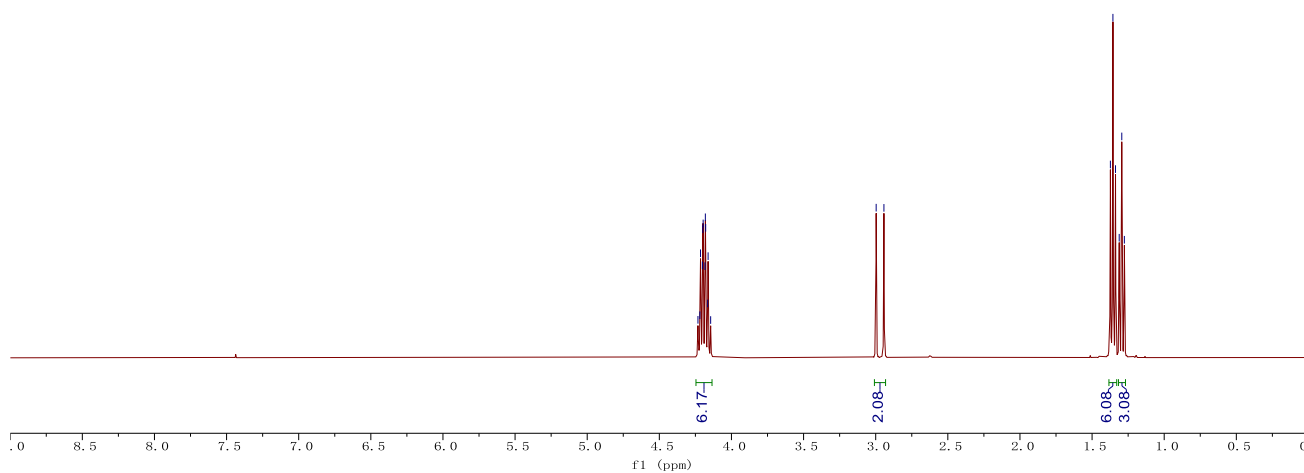

13C NMR CDCl3 100.62MHz

165.4  
165.3

77.0 CDCl3

62.3  
62.2  
61.1

34.6  
33.3

15.9  
15.9  
13.7

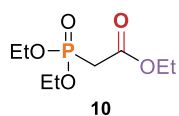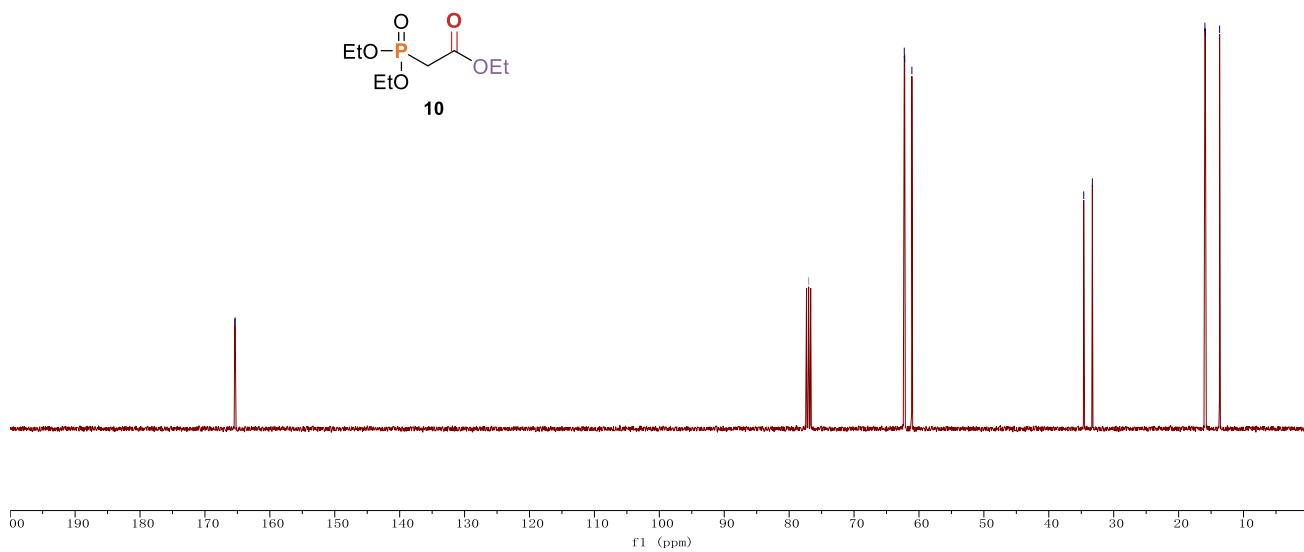

31P NMR CDCl3 161.97MHz

19.65

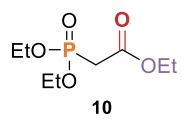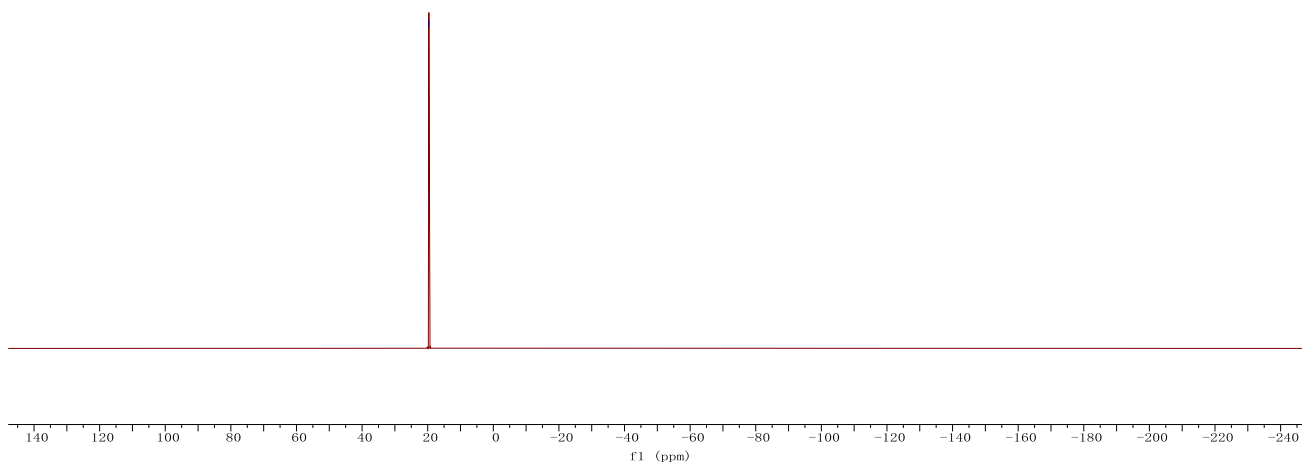

1H NMR CDCl3 400.13MHz

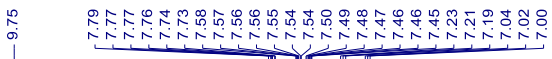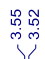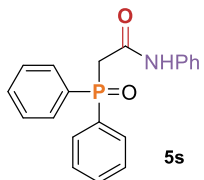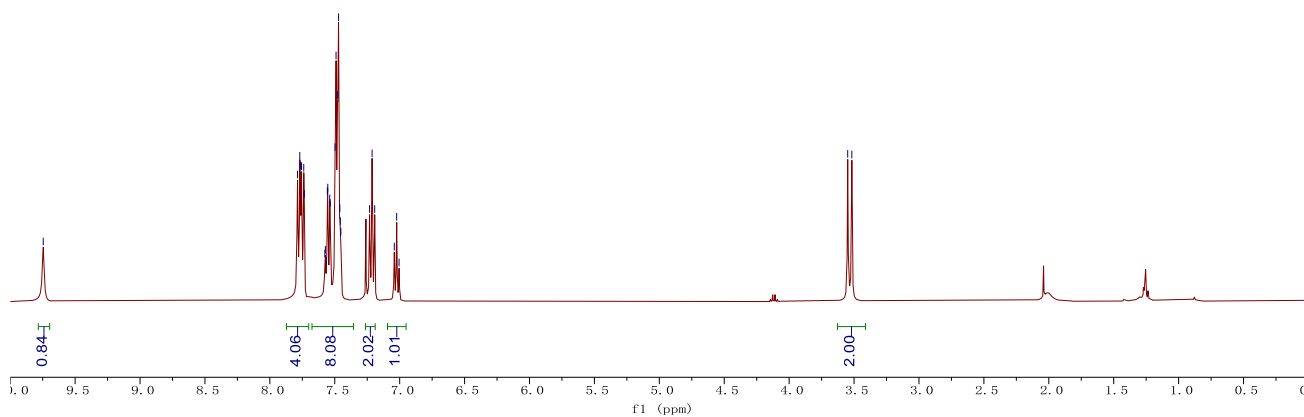

13C NMR CDCl3 176.08MHz

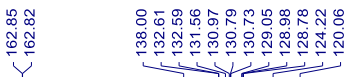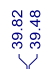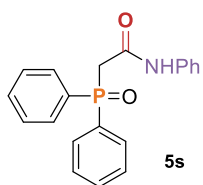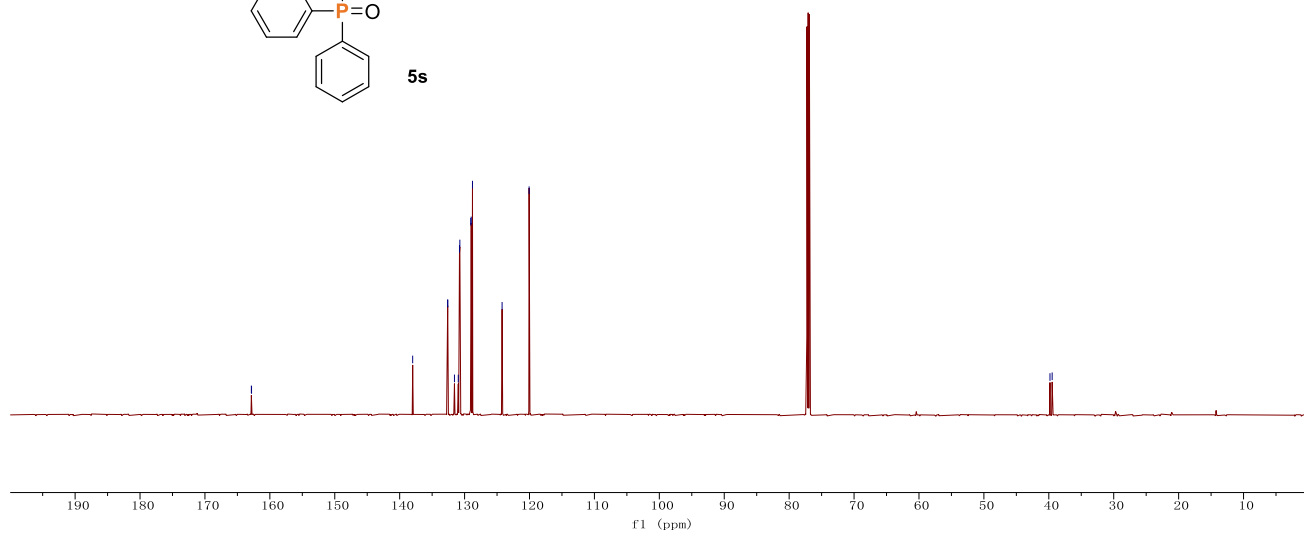

31P NMR CDCl3 161.97MHz

30.13

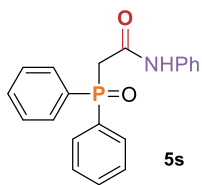



1H NMR CDCl3 400.13MHz

7.50  
7.50  
7.49  
7.49  
7.48  
7.48  
7.47  
7.46  
7.39  
7.38  
7.38  
7.37  
7.37  
7.37  
7.36  
7.35  
7.33  
7.31  
7.28  
7.26  
7.24  
7.08  
7.06  
7.05

— 3.17

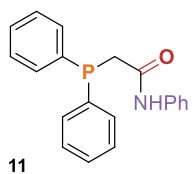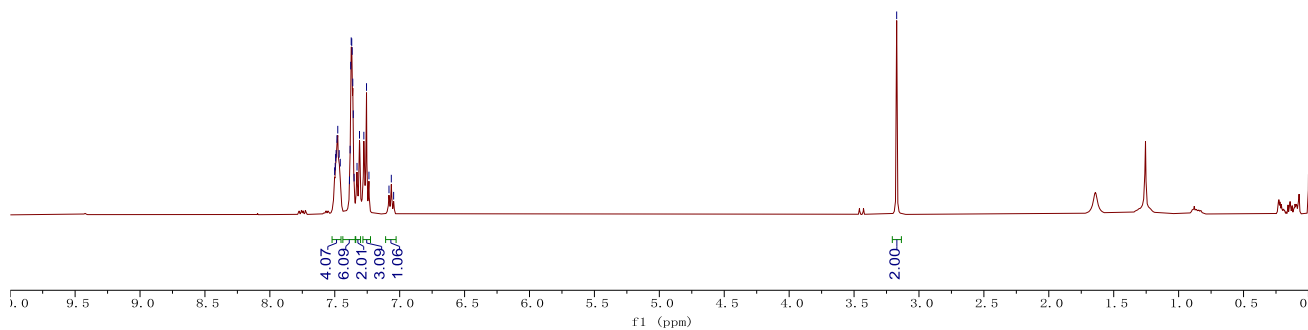

13C NMR CDCl3 100.62MHz

167.5  
167.4

137.7  
136.8  
136.7  
132.8  
132.6  
130.8  
130.7  
128.9  
128.9  
128.8  
124.3  
119.8

38.8  
38.6

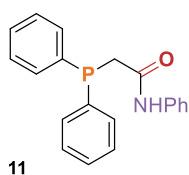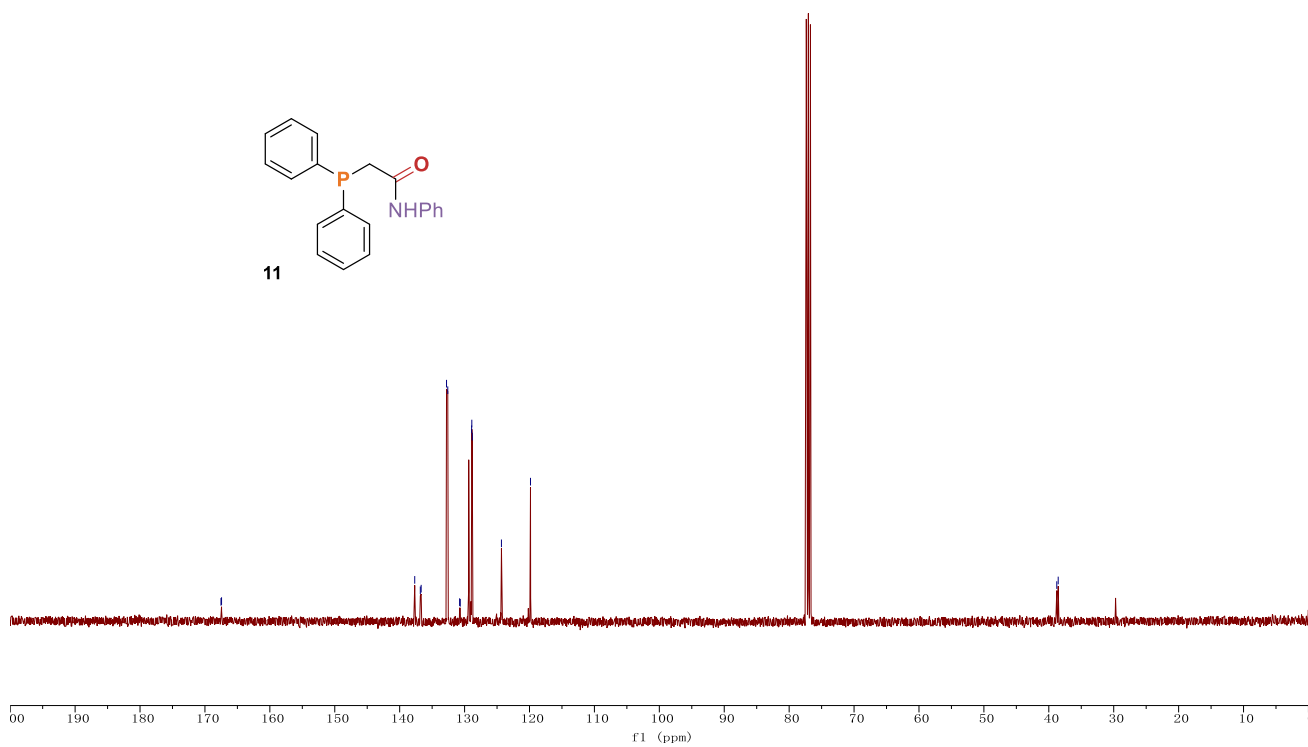

31P NMR CDCl3 161.97MHz

-17.08

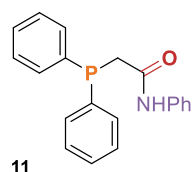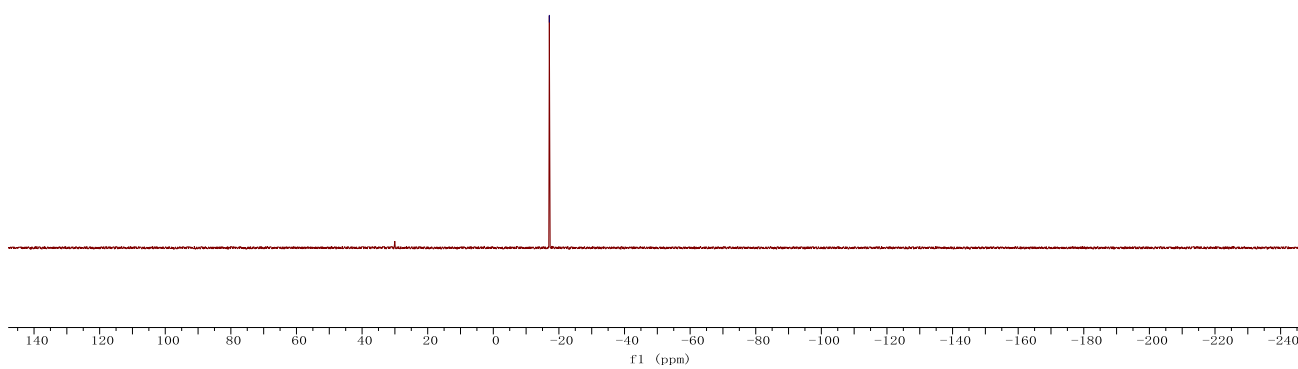

Supplement: d4qo00167b1.pdf [file d4qo00167b1.pdf]
